# Supplementary material for: Solid-state fermentation of green lentils by Lactiplantibacillus plantarum leads to formation of distinct peptides that are absorbable and enhances DPP-IV inhibitory activity in an intestinal Caco-2 cell model
Source: Royal Society of Chemistry journal article supplement (doi:10.1039/d4fo03326d), 2024-01-01

Supplementary Table 1. Physico-chemical properties of identified peptides identified in this study and their leading razor protein.

| Identifying number | Sequence  | Length (n° amino acids) | Net Charge | Hydrophobicity index | Boman Index (kcal/mol) | Mass (Da) | Leading razor protein                                |
|--------------------|-----------|-------------------------|------------|----------------------|------------------------|-----------|------------------------------------------------------|
| 1                  | DLDIFVNSV | 9                       | -2.00      | 0.91                 | 0.73                   | 1020.5    | Allergen Len c 1.0101                                |
| 2                  | EDEDEDEE  | 9                       | -8.99      | -3.50                | 7.45                   | 1137.3    | Legumin (Minor small)                                |
| 3                  | EEDEEEKEQ | 9                       | -5.99      | -3.54                | 6.74                   | 1163.4    | Convicilin                                           |
| 4                  | EQSPGQWRP | 9                       | 0.00       | -2.26                | 3.66                   | 1083.5    | Convicilin                                           |
| 5                  | EVDRLLTNQ | 9                       | -1.00      | -0.82                | 3.48                   | 1086.6    | Allergen Len c 1.0101                                |
| 6                  | FLPQYTDAD | 9                       | -2.00      | -0.63                | 1.78                   | 1068.5    | Allergen Len c 1.0102                                |
| 7                  | FNLEEGDIM | 9                       | -3.00      | -0.16                | 1.43                   | 1066.5    | p54 protein                                          |
| 8                  | GINAENNER | 9                       | -1.00      | -1.79                | 4.53                   | 1015.5    | Convicilin                                           |
| 9                  | GINAENNQR | 9                       | 0.00       | -1.79                | 4.39                   | 1014.5    | Beta-lathyrin 1                                      |
| 10                 | GVNAENNQR | 9                       | 0.00       | -1.82                | 4.49                   | 1000.5    | Cvc protein                                          |
| 11                 | GVSSESEPF | 9                       | -2.00      | -0.49                | 1.76                   | 937.4     | Vicilin 47k                                          |
| 12                 | HLPSFSPSP | 9                       | 0.09       | -0.42                | 0.77                   | 967.5     | Legumin B                                            |
| 13                 | KEDEDEDEE | 9                       | -6.99      | -3.54                | 7.31                   | 1136.4    | Legumin (Minor small)                                |
| 14                 | KSLPSEFEP | 9                       | -1.00      | -1.01                | 2.01                   | 1032.5    | Convicilin                                           |
| 15                 | LEEQENEPH | 9                       | -3.90      | -2.44                | 4.35                   | 1123.5    | Convicilin                                           |
| 16                 | LFENLQNYR | 9                       | 0.00       | -1.04                | 3.10                   | 1195.6    | Convicilin                                           |
| 17                 | LIETWNPNN | 9                       | -1.00      | -0.99                | 1.90                   | 1099.5    | N-terminal incomplete legumin A1 pre-pro-polypeptide |
| 18                 | LPQFTDADF | 9                       | -2.00      | -0.18                | 1.43                   | 1052.5    | Allergen Len c 1.0101                                |
| 19                 | LPSFSPSPQ | 9                       | 0.00       | -0.46                | 0.87                   | 958.5     | Legumin B                                            |
| 20                 | LTFPGSAQE | 9                       | -1.00      | -0.23                | 0.85                   | 948.5     | Convicilin                                           |
| 21                 | NEGGLLLPH | 9                       | -0.91      | -0.13                | 0.16                   | 948.5     | Convicilin                                           |
| 22                 | NTDYEEIEK | 9                       | -3.00      | -2.10                | 4.35                   | 1139.5    | Allergen Len c 1.0102                                |
| 23                 | PHMPSSSSN | 9                       | 0.09       | -1.24                | 2.51                   | 942.4     | p54 protein                                          |

|    |            |    |       |       |       |        |                                                  |
|----|------------|----|-------|-------|-------|--------|--------------------------------------------------|
| 24 | PSFSPSPQL  | 9  | 0.00  | -0.46 | 0.87  | 958.5  | Legumin B                                        |
| 25 | SDLFENLQN  | 9  | -2.00 | -0.88 | 2.77  | 1078.5 | Convicilin                                       |
| 26 | SDQENPFIF  | 9  | -2.00 | -0.70 | 2.25  | 1095.5 | Allergen Len c 1.0101                            |
| 27 | SKIFENLQN  | 9  | 0.00  | -0.84 | 2.42  | 1091.6 | Allergen Len c 1.0101                            |
| 28 | SLPSEFEPF  | 9  | -2.00 | -0.27 | 1.06  | 1051.5 | Convicilin                                       |
| 29 | SVSSESEPF  | 9  | -2.00 | -0.53 | 2.24  | 967.4  | Allergen Len c 1.0101                            |
| 30 | TEYEEIEKV  | 9  | -3.00 | -1.24 | 2.95  | 1138.5 | Allergen Len c 1.0101                            |
| 31 | VFEDNDFET  | 9  | -4.00 | -0.93 | 3.36  | 1114.4 | p54 protein                                      |
| 32 | VNGVAPGPI  | 9  | 0.00  | 0.80  | -1.12 | 822.5  | UPI0001AFF95                                     |
| 33 | VNPDDEEDL  | 9  | -5.00 | -1.62 | 4.16  | 1044.4 | Convicilin                                       |
| 34 | AFNTDYEEIE | 10 | -4.00 | -1.04 | 2.88  | 1229.5 | Allergen Len c 1.0102                            |
| 35 | AFNTEYEEIE | 10 | -4.00 | -1.04 | 2.69  | 1243.5 | Allergen Len c 1.0101                            |
| 36 | ASSNLDLLGF | 10 | -1.00 | 0.70  | 0.17  | 1035.5 | Vicilin                                          |
| 37 | DDEEEQEEET | 10 | -7.99 | -3.22 | 6.64  | 1251.4 | Allergen Len c 1.0102                            |
| 38 | DEEEGQEEET | 10 | -6.99 | -2.91 | 5.68  | 1193.4 | Allergen Len c 1.0101                            |
| 39 | EITPEKNPQL | 10 | -1.00 | -1.35 | 2.41  | 1167.6 | Allergen Len c 1.0101                            |
| 40 | EQIEELSKNA | 10 | -2.00 | -1.21 | 2.99  | 1159.6 | Allergen Len c 1.0101                            |
| 41 | EQSPGQWRPS | 10 | 0.00  | -2.11 | 3.63  | 1170.5 | Convicilin                                       |
| 42 | ETWNPNHPEL | 10 | -1.91 | -1.82 | 2.69  | 1235.6 | Legumin B                                        |
| 43 | EVDRLLTNQK | 10 | 0.00  | -1.13 | 3.69  | 1214.7 | Allergen Len c 1.0101                            |
| 44 | FEITPEKNPQ | 10 | -1.00 | -1.45 | 2.60  | 1201.6 | Allergen Len c 1.0101                            |
| 45 | FLPQFTDADF | 10 | -2.00 | 0.12  | 0.99  | 1199.5 | Allergen Len c 1.0101                            |
| 46 | FLPQQTDAF  | 10 | -2.00 | -0.51 | 1.84  | 1180.5 | Vicilin                                          |
| 47 | FNTDYEEIEK | 10 | -3.00 | -1.61 | 3.62  | 1286.6 | Allergen Len c 1.0102                            |
| 48 | GFGVNAENNQ | 10 | -1.00 | -0.95 | 2.16  | 1048.5 | Cvc protein                                      |
| 49 | HLPSFSPSPQ | 10 | 0.09  | -0.73 | 1.25  | 1095.5 | Legumin B                                        |
| 50 | IESEGGLIET | 10 | -3.00 | 0.00  | 0.98  | 1046.5 | N-terminal incomplete legumin A1 pre-pro-peptide |
| 51 | IKEGSLLLPN | 10 | 0.00  | 0.22  | 0.18  | 1082.6 | Allergen Len c 1.0101                            |

|    |              |    |       |       |       |        |                                        |
|----|--------------|----|-------|-------|-------|--------|----------------------------------------|
| 52 | INEGGLLLPH   | 10 | -0.91 | 0.33  | -0.35 | 1061.6 | Convicilin                             |
| 53 | KEDEDEDEEE   | 10 | -7.99 | -3.54 | 7.26  | 1265.4 | Legumin (Minor small)                  |
| 54 | KGVSSESEPF   | 10 | -1.00 | -0.83 | 2.14  | 1065.5 | Vicilin 47k                            |
| 55 | KSLPSEFEPF   | 10 | -1.00 | -0.63 | 1.51  | 1179.6 | Convicilin                             |
| 56 | LHLPSFSPSP   | 10 | 0.09  | 0.00  | 0.20  | 1080.6 | Legumin B                              |
| 57 | LLSGTQNQPS   | 10 | 0.00  | -0.72 | 1.63  | 1043.5 | Allergen Len c 1.0101                  |
| 58 | LSPGDVFPVIP  | 10 | -1.00 | 1.16  | -0.97 | 1042.6 | Beta-lathyrin 1                        |
| 59 | LTETWNPNHPP  | 10 | -0.91 | -1.54 | 2.26  | 1207.6 | Legumin B                              |
| 60 | LVNPDDEEDL   | 10 | -5.00 | -1.08 | 3.25  | 1157.5 | Convicilin                             |
| 61 | NFLAGEEDNV   | 10 | -3.00 | -0.53 | 2.09  | 1106.5 | Allergen Len c 1.0101                  |
| 62 | NTDYEEIEKV   | 10 | -3.00 | -1.47 | 3.51  | 1238.6 | Allergen Len c 1.0102                  |
| 63 | NTEYEEIEKV   | 10 | -3.00 | -1.47 | 3.32  | 1252.6 | Allergen Len c 1.0101                  |
| 64 | SDLFENLQNY   | 10 | -2.00 | -0.92 | 2.51  | 1241.6 | Convicilin                             |
| 65 | SDQENPFIFK   | 10 | -1.00 | -1.02 | 2.58  | 1223.6 | Allergen Len c 1.0101                  |
| 66 | SKIFENLQNY   | 10 | 0.00  | -0.89 | 2.19  | 1254.6 | Allergen Len c 1.0101                  |
| 67 | TETWNPNHPE   | 10 | -1.91 | -2.27 | 3.44  | 1223.5 | Legumin B                              |
| 68 | VFEDNDFETK   | 10 | -3.00 | -1.23 | 3.58  | 1242.5 | p54 protein                            |
| 69 | YLVNPDDEED   | 10 | -5.00 | -1.59 | 3.76  | 1207.5 | Convicilin                             |
| 70 | YQHEGKEEET   | 10 | -2.91 | -2.70 | 4.48  | 1248.5 | Convicilin                             |
| 71 | AFNTDYEEIEK  | 11 | -3.00 | -1.30 | 3.12  | 1357.6 | Allergen Len c 1.0102                  |
| 72 | AFNTEYEEIEK  | 11 | -3.00 | -1.30 | 2.95  | 1371.6 | Allergen Len c 1.0101                  |
| 73 | DLDIFVNSVEI  | 11 | -3.00 | 0.84  | 0.77  | 1262.6 | Allergen Len c 1.0101                  |
| 74 | DLNFTPNEFDS  | 11 | -3.00 | -1.02 | 2.97  | 1297.5 | Lipoxygenase, EC 1.13.11.-             |
| 75 | EEDEDEDEKEE  | 11 | -8.99 | -3.54 | 7.22  | 1394.5 | Legumin A2 primary translation product |
| 76 | EEEEGEWRGSQ  | 11 | -3.99 | -2.55 | 4.88  | 1334.5 | Convicilin                             |
| 77 | EEETSSSESQR  | 11 | -3.99 | -2.60 | 6.12  | 1309.5 | Convicilin                             |
| 78 | EIKEGSLLLLPH | 11 | -0.91 | -0.09 | 0.60  | 1234.7 | Vicilin                                |
| 79 | EIKEGSLLLLPN | 11 | -1.00 | -0.12 | 0.78  | 1211.7 | Allergen Len c 1.0101                  |
| 80 | EINEGGLLLPH  | 11 | -1.91 | -0.02 | 0.31  | 1190.6 | Convicilin                             |

|            |              |    |       |       |       |        |                                                      |
|------------|--------------|----|-------|-------|-------|--------|------------------------------------------------------|
| <b>81</b>  | EQIEELSKNAK  | 11 | -1.00 | -1.45 | 3.22  | 1287.7 | Allergen Len c 1.0101                                |
| <b>82</b>  | FEITPEKNPQL  | 11 | -1.00 | -0.97 | 1.92  | 1314.7 | Allergen Len c 1.0101                                |
| <b>83</b>  | FLPQFTDADFI  | 11 | -2.00 | 0.52  | 0.45  | 1312.6 | Allergen Len c 1.0101                                |
| <b>84</b>  | FLPQQTDADFI  | 11 | -2.00 | -0.05 | 1.23  | 1293.6 | Vicilin                                              |
| <b>85</b>  | FLPQYTDADFI  | 11 | -2.00 | 0.15  | 0.73  | 1328.6 | Allergen Len c 1.0102                                |
| <b>86</b>  | FNTEYEEIEKV  | 11 | -3.00 | -1.08 | 2.75  | 1399.7 | Allergen Len c 1.0101                                |
| <b>87</b>  | GDTIKLPAGTI  | 11 | 0.00  | 0.31  | 0.09  | 1084.6 | Allergen Len c 1.0101                                |
| <b>88</b>  | GFGINAENNER  | 11 | -1.00 | -1.25 | 3.35  | 1219.6 | Convicilin                                           |
| <b>89</b>  | GFGINAENNQR  | 11 | 0.00  | -1.25 | 3.24  | 1218.6 | Beta-lathyrin 1                                      |
| <b>90</b>  | GLHLPSFSPSP  | 11 | 0.09  | -0.04 | 0.10  | 1137.6 | Legumin B                                            |
| <b>91</b>  | GLTETWNPNHPI | 11 | -0.91 | -1.44 | 1.97  | 1264.6 | Legumin B                                            |
| <b>92</b>  | KEDEDEDEEEE  | 11 | -8.99 | -3.54 | 7.22  | 1394.5 | Legumin (Minor small)                                |
| <b>93</b>  | LLEDQEQEPQH  | 11 | -3.91 | -1.97 | 3.69  | 1364.6 | Allergen Len c 1.0102                                |
| <b>94</b>  | LNIGSSSSPDI  | 11 | -1.00 | 0.05  | 1.21  | 1088.5 | N-terminal incomplete legumin A1 pre-pro-polypeptide |
| <b>95</b>  | LSPGDVLVIPA  | 11 | -1.00 | 1.31  | -1.22 | 1079.6 | Allergen Len c 1.0101                                |
| <b>96</b>  | LSPGDVVIIPA  | 11 | -1.00 | 1.37  | -1.22 | 1079.6 | Convicilin                                           |
| <b>97</b>  | LTETWNPNHPE  | 11 | -1.91 | -1.72 | 2.68  | 1336.6 | Legumin B                                            |
| <b>98</b>  | NASSDLNLIGF  | 11 | -1.00 | 0.38  | 0.76  | 1149.6 | Allergen Len c 1.0101                                |
| <b>99</b>  | NFLAGEEDNVI  | 11 | -3.00 | -0.07 | 1.46  | 1219.6 | Allergen Len c 1.0101                                |
| <b>100</b> | NILEAAFNTEY  | 11 | -2.00 | -0.12 | 1.20  | 1283.6 | Allergen Len c 1.0101                                |
| <b>101</b> | QEEETSTQVQR  | 11 | -2.00 | -2.14 | 5.13  | 1333.6 | Allergen Len c 1.0102                                |
| <b>102</b> | QEEKEEEEEEEK | 11 | -5.99 | -3.57 | 6.47  | 1434.6 | Legumin B                                            |
| <b>103</b> | SACCDTCLCTR  | 11 | -0.25 | 0.49  | 1.85  | 1174.4 | Bowman-Birk inhibitor                                |
| <b>104</b> | SDQDNPFIFES  | 11 | -3.00 | -0.96 | 2.94  | 1297.5 | Vicilin type C                                       |
| <b>105</b> | SFNTGYEEIEK  | 11 | -2.00 | -1.25 | 2.72  | 1315.6 | Vicilin                                              |
| <b>106</b> | SVSSESEPFNL  | 11 | -2.00 | -0.41 | 1.99  | 1194.5 | Allergen Len c 1.0101                                |
| <b>107</b> | TLFENENGHIR  | 11 | -0.91 | -1.06 | 3.21  | 1328.6 | Convicilin                                           |
| <b>108</b> | VLLLEEQENEPH | 11 | -3.90 | -1.27 | 2.75  | 1335.6 | Convicilin                                           |

|            |              |    |       |       |       |        |                                                      |
|------------|--------------|----|-------|-------|-------|--------|------------------------------------------------------|
| <b>109</b> | YLVNPDDEEDL  | 11 | -5.00 | -1.10 | 2.97  | 1320.6 | Convicilin                                           |
| <b>110</b> | AFNTDYEEIEKV | 12 | -3.00 | -0.84 | 2.53  | 1456.7 | Allergen Len c 1.0102                                |
| <b>111</b> | AFNTEYEEIEKV | 12 | -3.00 | -0.84 | 2.37  | 1470.7 | Allergen Len c 1.0101                                |
| <b>112</b> | DDEEEQEEETST | 12 | -7.99 | -2.81 | 6.03  | 1439.5 | Allergen Len c 1.0102                                |
| <b>113</b> | DLDIFVNSVEIK | 12 | -2.00 | 0.44  | 1.17  | 1390.7 | Allergen Len c 1.0101                                |
| <b>114</b> | EITPEKNPQLQD | 12 | -2.00 | -1.71 | 3.20  | 1410.7 | Allergen Len c 1.0101                                |
| <b>115</b> | FFEITPEKNPQL | 12 | -1.00 | -0.66 | 1.51  | 1461.8 | Allergen Len c 1.0101                                |
| <b>116</b> | FLTLFENENGHI | 12 | -1.91 | -0.05 | 1.04  | 1432.7 | Convicilin                                           |
| <b>117</b> | FNTEYEEIEKVL | 12 | -3.00 | -0.68 | 2.11  | 1512.7 | Allergen Len c 1.0101                                |
| <b>118</b> | FQTLYENENGHI | 12 | -1.91 | -1.00 | 2.17  | 1463.7 | Vicilin 47k                                          |
| <b>119</b> | GDTIKLPAGTIA | 12 | 0.00  | 0.43  | -0.07 | 1155.6 | Allergen Len c 1.0101                                |
| <b>120</b> | GFGINAENNERN | 12 | -1.00 | -1.43 | 3.63  | 1333.6 | Convicilin                                           |
| <b>121</b> | GLHLPSFSPSPQ | 12 | 0.09  | -0.33 | 0.55  | 1265.6 | Legumin B                                            |
| <b>122</b> | IAGDSIGEEVEK | 12 | -3.00 | -0.38 | 1.71  | 1245.6 | Phosphoglycerate kinase, EC 2.7.2.3                  |
| <b>123</b> | ISLTDTGSSNNQ | 12 | -1.00 | -0.83 | 2.68  | 1235.6 | N-terminal incomplete legumin A1 pre-pro-polypeptide |
| <b>124</b> | KEDEDEDEEEEE | 12 | -9.99 | -3.53 | 7.18  | 1523.5 | Legumin (Minor small)                                |
| <b>125</b> | KEEAWTLFEKHS | 12 | -0.91 | -1.29 | 2.51  | 1503.7 | TIR-similar-domain-containing protein TSDC           |
| <b>126</b> | LAGEEDNVISQI | 12 | -3.00 | 0.01  | 1.36  | 1286.6 | Allergen Len c 1.0101                                |
| <b>127</b> | LLSGTQNQPSFL | 12 | 0.00  | -0.05 | 0.70  | 1303.7 | Allergen Len c 1.0101                                |
| <b>128</b> | LTETWNPNHPEL | 12 | -1.91 | -1.26 | 2.04  | 1449.7 | Legumin B                                            |
| <b>129</b> | NEGKGDFELVGQ | 12 | -2.00 | -0.98 | 2.11  | 1291.6 | Allergen Len c 1.0101                                |
| <b>130</b> | NGLHLPSFSPSP | 12 | 0.09  | -0.33 | 0.65  | 1251.6 | Legumin B                                            |
| <b>131</b> | QTLYENENGHIR | 12 | -0.91 | -1.61 | 3.66  | 1472.7 | Vicilin 47k                                          |
| <b>132</b> | RQQSQEENVIVK | 12 | 0.00  | -1.44 | 3.98  | 1456.8 | Vicilin 47k                                          |
| <b>133</b> | SDQDNPFIFESK | 12 | -2.00 | -1.21 | 3.16  | 1425.6 | Vicilin type C                                       |
| <b>134</b> | SFNTGYEEIEKV | 12 | -2.00 | -0.80 | 2.15  | 1414.7 | Vicilin                                              |
| <b>135</b> | SVSSESEPFNLR | 12 | -1.00 | -0.75 | 3.07  | 1350.6 | Allergen Len c 1.0101                                |

|     |               |    |       |       |       |        |                       |
|-----|---------------|----|-------|-------|-------|--------|-----------------------|
| 136 | TIFLPQFTDADF  | 12 | -2.00 | 0.42  | 0.63  | 1413.7 | Allergen Len c 1.0101 |
| 137 | VLLEEQENEPHQ  | 12 | -3.90 | -1.46 | 2.98  | 1463.7 | Convicilin            |
| 138 | WMYNDQDTPVIA  | 12 | -2.00 | -0.51 | 1.41  | 1451.6 | Legumin A             |
| 139 | AFNTDYEEIEKVL | 13 | -3.00 | -0.48 | 1.95  | 1569.8 | Allergen Len c 1.0102 |
| 140 | AFNTEYEEIEKVL | 13 | -3.00 | -0.48 | 1.81  | 1583.8 | Allergen Len c 1.0101 |
| 141 | AGLTETWNPNHPE | 13 | -1.91 | -1.35 | 2.05  | 1464.7 | Legumin B             |
| 142 | AILTVLNSNDRNS | 13 | 0.00  | -0.21 | 2.49  | 1415.7 | Allergen Len c 1.0101 |
| 143 | AIVIVTVNEGKGY | 13 | 0.00  | 0.75  | -0.30 | 1361.8 | Allergen Len c 1.0102 |
| 144 | AKLSPGDVVFIPA | 13 | 0.00  | 0.87  | -0.60 | 1312.7 | Beta-lathyrin 1       |
| 145 | ALEPDHRVESEAG | 13 | -2.91 | -0.99 | 2.97  | 1408.7 | Legumin B             |
| 146 | AVLTVLNSNDRNS | 13 | 0.00  | -0.23 | 2.55  | 1401.7 | Allergen Len c 1.0102 |
| 147 | DDEEEQEEETSTQ | 13 | -7.99 | -2.86 | 5.99  | 1567.6 | Allergen Len c 1.0102 |
| 148 | DLAIPVNRPGQLQ | 13 | 0.00  | -0.31 | 1.52  | 1419.8 | Allergen Len c 1.0101 |
| 149 | EAAFNTDYEEIEK | 13 | -4.00 | -1.23 | 3.03  | 1557.7 | Allergen Len c 1.0102 |
| 150 | EAAFNTEYEEIEK | 13 | -3.99 | -1.23 | 2.88  | 1571.7 | Allergen Len c 1.0101 |
| 151 | EASFNTGYEEIEK | 13 | -3.00 | -1.19 | 2.68  | 1515.7 | Vicilin               |
| 152 | EEESEEQNEGNSV | 13 | -5.99 | -2.25 | 4.73  | 1478.6 | Legumin (Minor small) |
| 153 | EIKEGSLLLPNYN | 13 | -1.00 | -0.47 | 1.18  | 1488.8 | Allergen Len c 1.0101 |
| 154 | EITPEKNPQLQDL | 13 | -2.00 | -1.28 | 2.57  | 1523.8 | Allergen Len c 1.0101 |
| 155 | ELAFPGSAQEVDL | 13 | -2.00 | -0.53 | 2.28  | 1417.7 | Vicilin               |
| 156 | ELAFPGSSHEVDL | 13 | -1.91 | -0.71 | 2.62  | 1442.7 | Vicilin 47k           |
| 157 | EVDRLLTNQKQSH | 13 | 0.09  | -1.45 | 3.88  | 1566.8 | Allergen Len c 1.0101 |
| 158 | FEITPEKNPQLQD | 13 | -2.00 | -1.36 | 2.72  | 1557.8 | Allergen Len c 1.0101 |
| 159 | FFEITPEKNPQLQ | 13 | -1.00 | -0.88 | 1.82  | 1589.8 | Allergen Len c 1.0101 |
| 160 | FLPQQTDADFILV | 13 | -2.00 | 0.57  | 0.35  | 1505.8 | Vicilin               |
| 161 | FLTLFENENGHIR | 13 | -0.91 | -0.39 | 2.11  | 1588.8 | Convicilin            |
| 162 | FNTEYEEIEKVLL | 13 | -3.00 | -0.33 | 1.57  | 1625.8 | Allergen Len c 1.0101 |
| 163 | FQTLYENENGHIR | 13 | -0.91 | -1.27 | 3.15  | 1619.8 | Vicilin 47k           |
| 164 | GDTIKLPAGTIAY | 13 | 0.00  | 0.30  | -0.05 | 1318.7 | Allergen Len c 1.0101 |

|            |                |    |        |       |       |        |                                                      |
|------------|----------------|----|--------|-------|-------|--------|------------------------------------------------------|
| <b>165</b> | GFGINAENNERNF  | 13 | -1.00  | -1.11 | 3.12  | 1480.7 | Convicilin                                           |
| <b>166</b> | GLTETWNPNHPEL  | 13 | -1.91  | -1.19 | 1.81  | 1506.7 | Legumin B                                            |
| <b>167</b> | KEDEDEDEEEEE   | 13 | -10.98 | -3.53 | 7.15  | 1652.6 | Legumin (Minor small)                                |
| <b>168</b> | KGVSSESEPFNLR  | 13 | 0.00   | -0.96 | 2.93  | 1448.7 | Vicilin 47k                                          |
| <b>169</b> | LVNPDDEEDLRVV  | 13 | -4.00  | -0.53 | 3.03  | 1511.7 | Convicilin                                           |
| <b>170</b> | NFLAGEEDNVISQ  | 13 | -3.00  | -0.39 | 1.92  | 1434.7 | Allergen Len c 1.0101                                |
| <b>171</b> | NFLTGSDDNVISQ  | 13 | -2.00  | -0.38 | 2.14  | 1408.6 | Convicilin                                           |
| <b>172</b> | NGLHLPSFSPSPQ  | 13 | 0.09   | -0.57 | 1.02  | 1379.7 | Legumin B                                            |
| <b>173</b> | SKIFENLQNYRLL  | 13 | 1.00   | -0.45 | 2.08  | 1636.9 | Allergen Len c 1.0101                                |
| <b>174</b> | SRNPIYSNKFGKF  | 13 | 3.00   | -1.08 | 2.65  | 1556.8 | Allergen Len c 1.0101                                |
| <b>175</b> | SRSDQDNPFIFES  | 13 | -2.00  | -1.22 | 3.90  | 1540.7 | Vicilin type C                                       |
| <b>176</b> | SVEIKEGSLLLPN  | 13 | -1.00  | 0.16  | 0.61  | 1397.8 | Allergen Len c 1.0101                                |
| <b>177</b> | SVEINEGGLLLPH  | 13 | -1.91  | 0.25  | 0.21  | 1376.7 | Convicilin                                           |
| <b>178</b> | TDTGSSNNQLDQM  | 13 | -2.00  | -1.44 | 3.50  | 1409.6 | N-terminal incomplete legumin A1 pre-pro-polypeptide |
| <b>179</b> | TIFLPQQTADDFI  | 13 | -2.00  | 0.25  | 0.86  | 1507.8 | Vicilin                                              |
| <b>180</b> | TLFLPQYTDADFI  | 13 | -2.00  | 0.36  | 0.44  | 1542.8 | Allergen Len c 1.0102                                |
| <b>181</b> | VNGVAPGPIWTPPL | 13 | 0.00   | 0.60  | -1.13 | 1319.7 | UPI0001AFFF95                                        |
| <b>182</b> | VSREQIEELSKNA  | 13 | -1.00  | -1.02 | 3.40  | 1501.8 | Allergen Len c 1.0101                                |
| <b>183</b> | YLGGNPETEFPET  | 13 | -3.00  | -1.08 | 1.74  | 1452.6 | Legumin J                                            |
| <b>184</b> | DTHKFCYKACHNSE | 14 | 0.06   | -1.28 | 2.95  | 1681.7 | Bowman-Birk inhibitor                                |
| <b>185</b> | ESCHSACDKVCAY  | 14 | -1.16  | 0.06  | 1.42  | 1517.5 | Bowman-Birk inhibitor                                |
| <b>186</b> | AFNTDYEEIEKVLL | 14 | -3.00  | -0.18 | 1.46  | 1682.8 | Allergen Len c 1.0102                                |
| <b>187</b> | AFNTEYEEIEKVLL | 14 | -3.00  | -0.18 | 1.33  | 1696.9 | Allergen Len c 1.0101                                |
| <b>188</b> | AGEEDNVISQIQRP | 14 | -2.00  | -0.95 | 2.98  | 1554.8 | Allergen Len c 1.0101                                |
| <b>189</b> | AGLTETWNPNHPEL | 14 | -1.91  | -0.98 | 1.56  | 1577.7 | Legumin B                                            |
| <b>190</b> | AILTVLKPDDRNSF | 14 | 0.00   | -0.08 | 1.92  | 1587.9 | Vicilin                                              |
| <b>191</b> | AILTVLNSNDRNSF | 14 | 0.00   | 0.01  | 2.10  | 1562.8 | Allergen Len c 1.0101                                |
| <b>192</b> | AILTVLSPNDRNSY | 14 | 0.00   | -0.15 | 1.84  | 1561.8 | Convicilin                                           |

|            |                |    |       |       |       |        |                       |
|------------|----------------|----|-------|-------|-------|--------|-----------------------|
| <b>193</b> | ALEPDHRVESEAGL | 14 | -2.91 | -0.65 | 2.41  | 1521.7 | Legumin B             |
| <b>194</b> | AVLTVLNSNDRNSF | 14 | 0.00  | -0.01 | 2.16  | 1548.8 | Allergen Len c 1.0102 |
| <b>195</b> | DDEEEQEEETSTQV | 14 | -7.99 | -2.36 | 5.28  | 1666.6 | Allergen Len c 1.0102 |
| <b>196</b> | DEEEGQEEETTKQV | 14 | -5.99 | -2.36 | 4.74  | 1649.7 | Allergen Len c 1.0101 |
| <b>197</b> | DLAIPVNNPGQLES | 14 | -2.00 | -0.27 | 1.16  | 1465.7 | Allergen Len c 1.0102 |
| <b>198</b> | DTSNIANQLDSTPR | 14 | -1.00 | -1.18 | 3.68  | 1530.7 | Storage protein       |
| <b>199</b> | EAAFNTDYEEIEKV | 14 | -4.00 | -0.84 | 2.52  | 1656.8 | Allergen Len c 1.0102 |
| <b>200</b> | EAAFNTEYEEIEKV | 14 | -3.99 | -0.84 | 2.39  | 1670.8 | Allergen Len c 1.0101 |
| <b>201</b> | EASFNTGYEEIEKV | 14 | -3.00 | -0.81 | 2.20  | 1614.7 | Vicilin               |
| <b>202</b> | EEEGQEEETTKQVQ | 14 | -4.99 | -2.36 | 4.51  | 1662.7 | Allergen Len c 1.0101 |
| <b>203</b> | EIKEGSLLLPHYNS | 14 | -0.91 | -0.47 | 1.20  | 1598.8 | Vicilin               |
| <b>204</b> | EIKEGSLLLPNYNS | 14 | -1.00 | -0.49 | 1.34  | 1575.8 | Allergen Len c 1.0101 |
| <b>205</b> | EINEGGLLLPHYNS | 14 | -1.91 | -0.41 | 0.97  | 1554.8 | Convicilin            |
| <b>206</b> | EITPEKNPQLQDL  | 14 | -3.00 | -1.44 | 3.01  | 1638.8 | Allergen Len c 1.0101 |
| <b>207</b> | ELAFPGSAQEVDRL | 14 | -2.00 | -0.22 | 1.77  | 1530.8 | Vicilin               |
| <b>208</b> | ELAFPGSSHEVDRL | 14 | -1.91 | -0.39 | 2.08  | 1555.8 | Vicilin 47k           |
| <b>209</b> | FDKRSDFENLQNY  | 14 | -1.00 | -1.31 | 3.66  | 1787.8 | Convicilin            |
| <b>210</b> | FEITPEKNPQLQDL | 14 | -2.00 | -0.99 | 2.17  | 1670.9 | Allergen Len c 1.0101 |
| <b>211</b> | FELVGQRNENQQEQ | 14 | -2.00 | -1.83 | 4.14  | 1717.8 | Allergen Len c 1.0101 |
| <b>212</b> | FFEITPEKNPQLQD | 14 | -2.00 | -1.06 | 2.31  | 1704.8 | Allergen Len c 1.0101 |
| <b>213</b> | FNRAEDLATAMEAR | 14 | -1.00 | -0.57 | 3.14  | 1593.8 | UPI0000010B06         |
| <b>214</b> | GDTIKLPAGTIAYL | 14 | 0.00  | 0.55  | -0.40 | 1431.8 | Allergen Len c 1.0101 |
| <b>215</b> | GDTIKLPAGTIGYL | 14 | 0.00  | 0.39  | -0.34 | 1417.8 | Vicilin               |
| <b>216</b> | GFGINAENNERNFL | 14 | -1.00 | -0.76 | 2.54  | 1593.8 | Convicilin            |
| <b>217</b> | GNLELVGFKNEQQE | 14 | -2.00 | -1.04 | 2.26  | 1603.8 | Convicilin            |
| <b>218</b> | GTKPEYGSTNTGSG | 14 | 0.00  | -1.36 | 2.14  | 1354.6 | Dehydrin a            |
| <b>219</b> | IAPVDTKPQTGGGY | 14 | 0.00  | -0.54 | 0.82  | 1402.7 | Lectin                |
| <b>220</b> | KEDEEKVVEEEEGE | 14 | -6.99 | -2.24 | 4.66  | 1676.7 | Convicilin            |
| <b>221</b> | LVNEGKGNLELVGF | 14 | -1.00 | 0.25  | 0.27  | 1487.8 | Convicilin            |



|            |                 |    |       |       |      |        |                                                      |
|------------|-----------------|----|-------|-------|------|--------|------------------------------------------------------|
| <b>222</b> | NFLAGEEDNVISQI  | 14 | -3.00 | -0.04 | 1.43 | 1547.7 | Allergen Len c 1.0101                                |
| <b>223</b> | NLLGFGINAENNER  | 14 | -1.00 | -0.69 | 2.41 | 1559.8 | Convicilin                                           |
| <b>224</b> | SFLLSGTQNPQPSFL | 14 | 0.00  | 0.10  | 0.63 | 1537.8 | Allergen Len c 1.0101                                |
| <b>225</b> | SLNTKYDTIEKVLL  | 14 | 0.00  | -0.12 | 1.30 | 1635.9 | Convicilin                                           |
| <b>226</b> | SRQEEDEDEDEKEE  | 14 | -7.99 | -3.41 | 7.37 | 1765.7 | Legumin A2 primary translation product               |
| <b>227</b> | SRSQDQNPFFIFESK | 14 | -1.00 | -1.41 | 4.02 | 1668.8 | Vicilin type C                                       |
| <b>228</b> | SVEINEGGLLLPHY  | 14 | -1.91 | 0.14  | 0.20 | 1539.8 | Convicilin                                           |
| <b>229</b> | TVNEGKGFELVGQ   | 14 | -2.00 | -0.59 | 1.70 | 1491.7 | Allergen Len c 1.0101                                |
| <b>230</b> | VLDLAIPVNRPGQL  | 14 | 0.00  | 0.54  | 0.38 | 1503.9 | Allergen Len c 1.0101                                |
| <b>231</b> | YLVNPDDEEDLRVV  | 14 | -4.00 | -0.59 | 2.82 | 1674.8 | Convicilin                                           |
| <b>232</b> | ALGDTTNGCISTGPH | 15 | -0.97 | -0.22 | 1.03 | 1442.6 | Superoxide dismutase, EC 1.15.1.1                    |
| <b>233</b> | DDVKSACCDTCLCTR | 15 | -1.25 | -0.09 | 2.62 | 1631.6 | Bowman-Birk inhibitor                                |
| <b>234</b> | GDDVKSACCDTCLCT | 15 | -2.25 | 0.19  | 1.56 | 1532.6 | Bowman-Birk inhibitor                                |
| <b>235</b> | AGEEDNVISQIQRPV | 15 | -2.00 | -0.61 | 2.51 | 1653.8 | Allergen Len c 1.0101                                |
| <b>236</b> | ASSNLNLLGFGINAK | 15 | 1.00  | 0.37  | 0.27 | 1517.8 | Convicilin                                           |
| <b>237</b> | DALEPDNRIESEGGL | 15 | -4.00 | -0.99 | 2.96 | 1613.8 | N-terminal incomplete legumin A1 pre-pro-polypeptide |
| <b>238</b> | DEEEGQEEETTKQVQ | 15 | -5.99 | -2.43 | 4.79 | 1777.7 | Allergen Len c 1.0101                                |
| <b>239</b> | DEEEQEEETSTQVQR | 15 | -5.99 | -2.50 | 5.71 | 1835.8 | Allergen Len c 1.0102                                |
| <b>240</b> | DLAIPVNNPGQLESF | 15 | -2.00 | -0.07 | 0.88 | 1612.8 | Allergen Len c 1.0102                                |
| <b>241</b> | DLAIPVNRPGQLQSF | 15 | 0.00  | -0.13 | 1.35 | 1653.9 | Allergen Len c 1.0101                                |
| <b>242</b> | LCESNADCTNKGSGK | 15 | -0.12 | -0.95 | 2.54 | 1525.7 | Insecticidal lentil peptide                          |
| <b>243</b> | EAAFNTDYEEIEKVL | 15 | -4.00 | -0.53 | 2.03 | 1769.8 | Allergen Len c 1.0102                                |
| <b>244</b> | EAAFNTEYEEIEKVL | 15 | -3.99 | -0.53 | 1.90 | 1783.9 | Allergen Len c 1.0101                                |
| <b>245</b> | EASFNTGYEEIEKVL | 15 | -3.00 | -0.50 | 1.73 | 1727.8 | Vicilin                                              |
| <b>246</b> | EASLNTKYDTIEKVL | 15 | -1.00 | -0.48 | 1.88 | 1722.9 | Convicilin                                           |
| <b>247</b> | EEEGQEEETTKQVQR | 15 | -3.99 | -2.50 | 5.21 | 1818.8 | Allergen Len c 1.0101                                |
| <b>248</b> | EITPEKNPQLQDLDI | 15 | -3.00 | -1.05 | 2.48 | 1751.9 | Allergen Len c 1.0101                                |
| <b>249</b> | FFEITPEKNPQLQDL | 15 | -2.00 | -0.74 | 1.83 | 1817.9 | Allergen Len c 1.0101                                |

|            |                  |    |       |       |       |        |                                                      |
|------------|------------------|----|-------|-------|-------|--------|------------------------------------------------------|
| <b>250</b> | HAIVKVSREQIEELR  | 15 | 0.09  | -0.53 | 2.98  | 1806   | Convicilin                                           |
| <b>251</b> | IESEGGLIETWNPNN  | 15 | -3.00 | -0.87 | 1.82  | 1671.8 | N-terminal incomplete legumin A1 pre-pro-polypeptide |
| <b>252</b> | KEDEEKVVEEEGEW   | 15 | -6.99 | -2.15 | 4.20  | 1862.8 | Convicilin                                           |
| <b>253</b> | LAGEEDNVISQIQRP  | 15 | -2.00 | -0.63 | 2.46  | 1667.8 | Allergen Len c 1.0101                                |
| <b>254</b> | LSPGDV FVIPAGHPV | 15 | -0.91 | 0.83  | -0.79 | 1503.8 | Beta-lathyrin 1                                      |
| <b>255</b> | LSPGDV FVVPAGHPV | 15 | -0.91 | 0.81  | -0.73 | 1489.8 | Allergen Len c 1.0102                                |
| <b>256</b> | LSPGDV LVIPAGHPV | 15 | -0.91 | 0.89  | -0.92 | 1469.8 | Allergen Len c 1.0101                                |
| <b>257</b> | LSPGDV VVIPAGHPV | 15 | -0.91 | 0.94  | -0.92 | 1469.8 | Convicilin                                           |
| <b>258</b> | LVNPDDEEDLRVVDF  | 15 | -5.00 | -0.51 | 3.01  | 1773.8 | Convicilin                                           |
| <b>259</b> | NLERGDTIKLPAGTI  | 15 | 0.00  | -0.29 | 1.63  | 1596.9 | Allergen Len c 1.0101                                |
| <b>260</b> | RPSHGKEEDEEEKEQ  | 15 | -3.90 | -3.09 | 5.88  | 1825.8 | Convicilin                                           |
| <b>261</b> | SNRFQTLYENENGHI  | 15 | -0.91 | -1.39 | 3.40  | 1820.8 | Vicilin 47k                                          |
| <b>262</b> | SRSDDNPFIFESKR   | 15 | 0.00  | -1.62 | 4.74  | 1824.9 | Vicilin type C                                       |
| <b>263</b> | SVEINEGGLLLPHYN  | 15 | -1.91 | -0.11 | 0.63  | 1653.8 | Convicilin                                           |
| <b>264</b> | TGGTVITDDLGLELK  | 15 | -2.00 | 0.16  | 0.73  | 1530.8 | UPI00000109F0                                        |
| <b>265</b> | TGSDDNVISQIENPV  | 15 | -3.00 | -0.53 | 2.24  | 1586.7 | Convicilin                                           |
| <b>266</b> | TIFLPQQTADAFILV  | 15 | -2.00 | 0.75  | 0.14  | 1719.9 | Vicilin                                              |
| <b>267</b> | TLFLPQYTDADFILV  | 15 | -2.00 | 0.85  | -0.22 | 1754.9 | Allergen Len c 1.0102                                |
| <b>268</b> | VNSVEIKEGSLLLPN  | 15 | -1.00 | 0.19  | 0.70  | 1610.9 | Allergen Len c 1.0101                                |
| <b>269</b> | VSSVEINEGGLLLPH  | 15 | -1.91 | 0.44  | 0.14  | 1562.8 | Convicilin                                           |
| <b>270</b> | GDDVKSACCDTCLCTR | 16 | -1.25 | -0.11 | 2.40  | 1688.7 | Bowman-Birk inhibitor                                |
| <b>271</b> | AFPGSAQEVDRLLENQ | 16 | -2.00 | -0.63 | 2.31  | 1772.9 | Vicilin                                              |
| <b>272</b> | AGEEDNVISQIQRPVK | 16 | -1.00 | -0.81 | 2.70  | 1781.9 | Allergen Len c 1.0101                                |
| <b>273</b> | DEEEGQEEETTKQVQR | 16 | -4.99 | -2.56 | 5.43  | 1933.9 | Allergen Len c 1.0101                                |
| <b>274</b> | DLAIPVNNPGQLESFL | 16 | -2.00 | 0.18  | 0.52  | 1725.9 | Allergen Len c 1.0102                                |
| <b>275</b> | DTIEKVLLEEENEPH  | 16 | -4.90 | -1.32 | 3.06  | 1921.9 | Convicilin                                           |
| <b>276</b> | EAAFNTDYEEIEKVLL | 16 | -4.00 | -0.26 | 1.59  | 1882.9 | Allergen Len c 1.0102                                |
| <b>277</b> | EAAFNTEYEEIEKVLL | 16 | -3.99 | -0.26 | 1.47  | 1896.9 | Allergen Len c 1.0101                                |

|            |                   |    |       |       |       |        |                                                      |
|------------|-------------------|----|-------|-------|-------|--------|------------------------------------------------------|
| <b>278</b> | EASLNTKYDTIEKVLL  | 16 | -1.00 | -0.21 | 1.45  | 1836   | Convicilin                                           |
| <b>279</b> | EITPEKNPQLQDLDF   | 16 | -3.00 | -0.81 | 2.14  | 1899   | Allergen Len c 1.0101                                |
| <b>280</b> | FEITPEKNPQLQDLDF  | 16 | -3.00 | -0.81 | 2.14  | 1899   | Allergen Len c 1.0101                                |
| <b>281</b> | FFEITPEKNPQLQDLDF | 16 | -3.00 | -0.91 | 2.26  | 1932.9 | Allergen Len c 1.0101                                |
| <b>282</b> | FFEVTPEKKYPQLQDL  | 16 | -1.00 | -0.82 | 1.71  | 1981   | Convicilin                                           |
| <b>283</b> | IESEGGLIETWNPNNR  | 16 | -2.00 | -1.09 | 2.64  | 1827.9 | N-terminal incomplete legumin A1 pre-pro-polypeptide |
| <b>284</b> | LAGEEDNVISQIQRPV  | 16 | -2.00 | -0.33 | 2.05  | 1766.9 | Allergen Len c 1.0101                                |
| <b>285</b> | LSGTQNPQSFSLGFSK  | 16 | 1.00  | -0.47 | 1.36  | 1696.8 | Allergen Len c 1.0101                                |
| <b>286</b> | LSPGDVFPAGHPVA    | 16 | -0.91 | 0.89  | -0.85 | 1574.8 | Beta-lathyrin 1                                      |
| <b>287</b> | LSPGDVFPVFPAGHPVA | 16 | -0.91 | 0.87  | -0.80 | 1560.8 | Allergen Len c 1.0102                                |
| <b>288</b> | LSPGDVLPAGHPVA    | 16 | -0.91 | 0.95  | -0.98 | 1540.9 | Allergen Len c 1.0101                                |
| <b>289</b> | LSPGDVFPAGHPVS    | 16 | -0.91 | 0.83  | -0.65 | 1556.9 | Convicilin                                           |
| <b>290</b> | LTDTGSSNNQLDQMPR  | 16 | -1.00 | -1.31 | 3.47  | 1775.8 | N-terminal incomplete legumin A1 pre-pro-polypeptide |
| <b>291</b> | NASSDLNLIGFGINAK  | 16 | 0.00  | 0.17  | 0.80  | 1632.8 | Allergen Len c 1.0101                                |
| <b>292</b> | NILEAAFNTYEYEEIEK | 16 | -3.99 | -0.70 | 2.14  | 1911.9 | Allergen Len c 1.0101                                |
| <b>293</b> | NLERGDTIKLPAGTIA  | 16 | 0.00  | -0.16 | 1.41  | 1667.9 | Allergen Len c 1.0101                                |
| <b>294</b> | SILEAAFNTDYEEIEK  | 16 | -4.00 | -0.53 | 2.06  | 1870.9 | Allergen Len c 1.0102                                |
| <b>295</b> | SKIFENLQNYRLLLEYK | 16 | 1.00  | -0.91 | 2.47  | 2057.1 | Allergen Len c 1.0101                                |
| <b>296</b> | SKPHTIFLPQFTDADF  | 16 | -0.91 | -0.28 | 1.32  | 1862.9 | Allergen Len c 1.0101                                |
| <b>297</b> | SLTDTGSSNNQLDQMP  | 16 | -2.00 | -1.08 | 2.75  | 1706.7 | N-terminal incomplete legumin A1 pre-pro-polypeptide |
| <b>298</b> | SNKFLTLFENENGHIR  | 16 | 0.09  | -0.83 | 2.69  | 1918   | Convicilin                                           |
| <b>299</b> | SNRFQTLYENENGHIR  | 16 | 0.09  | -1.58 | 4.12  | 1976.9 | Vicilin 47k                                          |
| <b>300</b> | SPGDVLPAGHPVAI    | 16 | -0.91 | 0.99  | -0.98 | 1540.9 | Allergen Len c 1.0101                                |
| <b>301</b> | SVEIKEGSLLLPNYNS  | 16 | -1.00 | -0.22 | 1.13  | 1761.9 | Allergen Len c 1.0101                                |
| <b>302</b> | SVEINEGGLLLPHYNS  | 16 | -1.91 | -0.15 | 0.81  | 1740.9 | Convicilin                                           |
| <b>303</b> | SVLEASLNTKYDTIEK  | 16 | -1.00 | -0.50 | 1.97  | 1809.9 | Convicilin                                           |

|            |                    |    |       |       |       |        |                       |
|------------|--------------------|----|-------|-------|-------|--------|-----------------------|
| <b>304</b> | TGSDDNVISQIENPVK   | 16 | -2.00 | -0.74 | 2.45  | 1714.8 | Convicilin            |
| <b>305</b> | AAVDTLPPVVNESEEPT  | 17 | -4.00 | -0.26 | 1.39  | 1766.9 | Histone H1            |
| <b>306</b> | AFPGSAQEVDRLLENQK  | 17 | -1.00 | -0.82 | 2.50  | 1901   | Vicilin               |
| <b>307</b> | AKLSPGDVFPAGHPV    | 17 | 0.09  | 0.61  | -0.48 | 1702.9 | Beta-lathyrin 1       |
| <b>308</b> | DDEEEQEEETSTQVQRY  | 17 | -6.99 | -2.49 | 5.56  | 2113.9 | Allergen Len c 1.0102 |
| <b>309</b> | DEEEGQEEETTKVQRY   | 17 | -4.99 | -2.49 | 5.12  | 2096.9 | Allergen Len c 1.0101 |
| <b>310</b> | DLSAPDLDNSGGGSIK   | 17 | -2.00 | -0.56 | 1.66  | 1601.8 | FAX3                  |
| <b>311</b> | EEESEEQNEGNSVLSGF  | 17 | -5.99 | -1.41 | 3.30  | 1882.8 | Legumin (Minor small) |
| <b>312</b> | EITPEKNPQLQDLDFV   | 17 | -3.00 | -0.51 | 1.78  | 1998   | Allergen Len c 1.0101 |
| <b>313</b> | FEITPEKNPQLQDLDF   | 17 | -3.00 | -0.59 | 1.84  | 2046   | Allergen Len c 1.0101 |
| <b>314</b> | FEVTPEKKYPQLQDLDL  | 17 | -2.00 | -0.92 | 2.01  | 2062.1 | Convicilin            |
| <b>315</b> | FFEITPEKNPQLQDLDI  | 17 | -3.00 | -0.59 | 1.84  | 2046   | Allergen Len c 1.0101 |
| <b>316</b> | GKFFEITPEKNPQLQDL  | 17 | -1.00 | -0.91 | 1.89  | 2003   | Allergen Len c 1.0101 |
| <b>317</b> | LAFPGSAQEVDRLLENQ  | 17 | -2.00 | -0.37 | 1.88  | 1886   | Vicilin               |
| <b>318</b> | LLSGTQNQPSFLSGFSK  | 17 | 1.00  | -0.22 | 0.99  | 1809.9 | Allergen Len c 1.0101 |
| <b>319</b> | NGDDVKSACCDTCLCTR  | 17 | -1.25 | -0.31 | 2.65  | 1802.7 | Bowman-Birk inhibitor |
| <b>320</b> | LSPGDVFPVAPAGHPVAI | 17 | -0.91 | 1.08  | -1.04 | 1673.9 | Allergen Len c 1.0102 |
| <b>321</b> | LSPGDVLPVAPAGHPVAI | 17 | -0.91 | 1.16  | -1.21 | 1653.9 | Allergen Len c 1.0101 |
| <b>322</b> | LSPGDVVIIPAGHPVAI  | 17 | -0.91 | 1.20  | -1.21 | 1653.9 | Convicilin            |
| <b>323</b> | LSPGDVVIIPAGHPVSI  | 17 | -0.91 | 1.05  | -0.90 | 1669.9 | Convicilin            |
| <b>324</b> | NFLAGEEDNVISQIQRP  | 17 | -2.00 | -0.60 | 2.38  | 1929   | Allergen Len c 1.0101 |
| <b>325</b> | NILEAAFNTYEYEEIEKV | 17 | -3.99 | -0.41 | 1.78  | 2011   | Allergen Len c 1.0101 |
| <b>326</b> | NLLGFGINAENNERNFL  | 17 | -1.00 | -0.38 | 1.91  | 1934   | Convicilin            |
| <b>327</b> | QWRPSHGKEEDEEKEQ   | 17 | -3.90 | -2.98 | 5.38  | 2139.9 | Convicilin            |
| <b>328</b> | SILEAAFNTDYEEIEKV  | 17 | -4.00 | -0.25 | 1.70  | 1970   | Allergen Len c 1.0102 |
| <b>329</b> | SVLEASLNTKYDTIEKV  | 17 | -1.00 | -0.22 | 1.62  | 1909   | Convicilin            |
| <b>330</b> | TEYEEIEKVLLEEQEQK  | 17 | -4.99 | -1.47 | 3.16  | 2136   | Allergen Len c 1.0101 |
| <b>331</b> | TFFIAPVDTKPQTGGGY  | 17 | 0.00  | -0.15 | 0.48  | 1797.9 | Lectin                |
| <b>332</b> | TGSDDNVISQIENPVKE  | 17 | -3.00 | -0.90 | 2.70  | 1843.9 | Convicilin            |

|            |                     |    |       |       |       |        |                                                      |
|------------|---------------------|----|-------|-------|-------|--------|------------------------------------------------------|
| <b>333</b> | VLDLAIPVNRPGQLQSF   | 17 | 0.00  | 0.35  | 0.66  | 1866   | Allergen Len c 1.0101                                |
| <b>334</b> | VNSVEIKEGSLLLPNYN   | 17 | -1.00 | -0.12 | 1.02  | 1888   | Allergen Len c 1.0101                                |
| <b>335</b> | YQHEGKEEETSSESQER   | 17 | -3.90 | -2.61 | 5.24  | 2051.9 | Convicilin                                           |
| <b>336</b> | AGEEDNVISQIQRPVKEL  | 18 | -2.00 | -0.71 | 2.51  | 2024.1 | Allergen Len c 1.0101                                |
| <b>337</b> | DALEPDNRIESEGLIET   | 18 | -4.99 | -0.81 | 2.71  | 1956.9 | N-terminal incomplete legumin A1 pre-pro-polypeptide |
| <b>338</b> | DVIVKVSREQIEELSKNA  | 18 | -1.00 | -0.43 | 2.53  | 2056.1 | Allergen Len c 1.0101                                |
| <b>339</b> | EITPEKNPQLQDLDFVN   | 18 | -3.00 | -0.68 | 2.05  | 2112.1 | Allergen Len c 1.0101                                |
| <b>340</b> | FEITPEKNPQLQDLDFV   | 18 | -3.00 | -0.33 | 1.51  | 2145.1 | Allergen Len c 1.0101                                |
| <b>341</b> | FFEITPEKNPQLQDLDF   | 18 | -3.00 | -0.41 | 1.57  | 2193.1 | Allergen Len c 1.0101                                |
| <b>342</b> | FFEVTPEKKYPQLQDLDL  | 18 | -2.00 | -0.71 | 1.73  | 2209.1 | Convicilin                                           |
| <b>343</b> | FGKFFEITPEKNPQLQDL  | 18 | -1.00 | -0.70 | 1.62  | 2150.1 | Allergen Len c 1.0101                                |
| <b>344</b> | FLPQYTDADFILVLSGK   | 18 | -1.00 | 0.69  | -0.10 | 2025.1 | Allergen Len c 1.0102                                |
| <b>345</b> | ISLTDTGSSNNQLDQMPR  | 18 | -1.00 | -0.96 | 3.00  | 1975.9 | N-terminal incomplete legumin A1 pre-pro-polypeptide |
| <b>346</b> | LAFPGSAQEVDRLLENQK  | 18 | -1.00 | -0.57 | 2.09  | 2014   | Vicilin                                              |
| <b>347</b> | LSPGDVLVIPAGHPVAIN  | 18 | -0.91 | 0.90  | -0.77 | 1768   | Allergen Len c 1.0101                                |
| <b>348</b> | LSPGDVVIIPAGHPVVIS  | 18 | -0.91 | 0.94  | -0.66 | 1757   | Convicilin                                           |
| <b>349</b> | NEDVIVKVSREQIEELSK  | 18 | -2.00 | -0.72 | 3.00  | 2114.1 | Allergen Len c 1.0101                                |
| <b>350</b> | NFLAGEEDNVISQIQRPV  | 18 | -2.00 | -0.33 | 2.03  | 2028   | Allergen Len c 1.0101                                |
| <b>351</b> | NFLTGSDDNVISQIENPV  | 18 | -3.00 | -0.27 | 1.80  | 1960.9 | Convicilin                                           |
| <b>352</b> | NILEAAFNTYEYEEIEKVL | 18 | -3.99 | -0.18 | 1.40  | 2124.1 | Allergen Len c 1.0101                                |
| <b>353</b> | NLERGDTIKLPAGTIAYL  | 18 | 0.00  | 0.00  | 0.99  | 1944.1 | Allergen Len c 1.0101                                |
| <b>354</b> | NSFNLERGDTIKLPAGTI  | 18 | 0.00  | -0.32 | 1.75  | 1945   | Allergen Len c 1.0101                                |
| <b>355</b> | NTEYEEIEKVLLEEQQK   | 18 | -4.99 | -1.58 | 3.36  | 2250.1 | Allergen Len c 1.0101                                |
| <b>356</b> | SATTGAEFAAHEVHSWSF  | 18 | -1.82 | -0.08 | 0.99  | 1933.9 | Lectin                                               |
| <b>357</b> | SILEAAFNTDYEEIEKVL  | 18 | -4.00 | -0.03 | 1.33  | 2083   | Allergen Len c 1.0102                                |
| <b>358</b> | SNRFQTLYENENGHIRLL  | 18 | 0.09  | -0.98 | 3.12  | 2203.1 | Vicilin 47k                                          |
| <b>359</b> | SVLEASLNTKYDTIEKVL  | 18 | -1.00 | 0.00  | 1.26  | 2022.1 | Convicilin                                           |

|            |                      |    |       |       |       |        |                                                      |
|------------|----------------------|----|-------|-------|-------|--------|------------------------------------------------------|
| <b>360</b> | TGSDDNVISQIENPVKEL   | 18 | -3.00 | -0.64 | 2.28  | 1957   | Convicilin                                           |
| <b>361</b> | VESEAGLTETWNPNHPEL   | 18 | -3.90 | -0.96 | 1.93  | 2021.9 | Legumin B                                            |
| <b>362</b> | VLDLAIPVNRPGQLQSFL   | 18 | 0.00  | 0.54  | 0.35  | 1979.1 | Allergen Len c 1.0101                                |
| <b>363</b> | VNSVEIKEGSLLLPHYNS   | 18 | -0.91 | -0.14 | 1.04  | 1998   | Vicilin                                              |
| <b>364</b> | VNSVEIKEGSLLLPNYNS   | 18 | -1.00 | -0.16 | 1.15  | 1975   | Allergen Len c 1.0101                                |
| <b>365</b> | VSSVEINEGGLLLPHYNS   | 18 | -1.91 | 0.06  | 0.68  | 1927   | Convicilin                                           |
| <b>366</b> | AFNTEYEEIEKVLLEESEQ  | 19 | -5.99 | -1.05 | 2.63  | 2340.1 | Allergen Len c 1.0101                                |
| <b>367</b> | AFPGSAQEVDRLLLENQKQS | 19 | -1.00 | -0.96 | 2.71  | 2116.1 | Vicilin                                              |
| <b>368</b> | AKLSPGDVFPVAGHPVAI   | 19 | 0.09  | 0.86  | -0.73 | 1873   | Allergen Len c 1.0102                                |
| <b>369</b> | ARLSPGDVLVIPAGHPVAI  | 19 | 0.09  | 0.89  | -0.39 | 1881.1 | Allergen Len c 1.0101                                |
| <b>370</b> | EITPEKNPQLQDLDFVNS   | 19 | -3.00 | -0.68 | 2.12  | 2199.1 | Allergen Len c 1.0101                                |
| <b>371</b> | FEITPEKNPQLQDLDFVN   | 19 | -3.00 | -0.49 | 1.78  | 2259.1 | Allergen Len c 1.0101                                |
| <b>372</b> | FFEVTPEKKYPQLQDLDLL  | 19 | -2.00 | -0.47 | 1.38  | 2322.2 | Convicilin                                           |
| <b>373</b> | FNTEYEEIEKVLLEESEQK  | 19 | -4.99 | -1.35 | 3.02  | 2397.2 | Allergen Len c 1.0101                                |
| <b>374</b> | LAGEEDNVISQIQRPVKEL  | 19 | -2.00 | -0.47 | 2.12  | 2137.1 | Allergen Len c 1.0101                                |
| <b>375</b> | LDALEPDNRIESEGLIET   | 19 | -4.99 | -0.56 | 2.31  | 2070   | N-terminal incomplete legumin A1 pre-pro-polypeptide |
| <b>376</b> | LGGNPETEFPETQEEQQGR  | 19 | -3.99 | -1.85 | 3.51  | 2145   | Legumin J                                            |
| <b>377</b> | LSPGDVVIIPAGHPVSISA  | 19 | -0.91 | 0.99  | -0.72 | 1828   | Convicilin                                           |
| <b>378</b> | LVDMVQLLVLMNGASVLDMH | 19 | -1.91 | 1.11  | -0.42 | 2084   | Potassium channel                                    |
| <b>379</b> | NASSDLNLIGFGINAKNNQ  | 19 | 0.00  | -0.41 | 1.67  | 1989   | Allergen Len c 1.0101                                |
| <b>380</b> | NFLAGEEDNVISQIQRPVK  | 19 | -1.00 | -0.52 | 2.21  | 2156.1 | Allergen Len c 1.0101                                |
| <b>381</b> | NFLTGSDDNVISQIENPVK  | 19 | -2.00 | -0.46 | 1.99  | 2089   | Convicilin                                           |
| <b>382</b> | NILEAAFNTEYEEIEKVLL  | 19 | -3.99 | 0.03  | 1.07  | 2237.1 | Allergen Len c 1.0101                                |
| <b>383</b> | NNPGQLESFLLSGTQNQPS  | 19 | -1.00 | -0.92 | 1.92  | 2030   | Allergen Len c 1.0102                                |
| <b>384</b> | NRPGEPQSFLLSGNQNQPS  | 19 | 0.00  | -1.40 | 2.83  | 2069   | Vicilin                                              |
| <b>385</b> | NRPGQLQSFLLSGTQNQPS  | 19 | 1.00  | -0.97 | 2.29  | 2071   | Allergen Len c 1.0101                                |
| <b>386</b> | NTEYEEIEKVLLEESEQKS  | 19 | -4.99 | -1.54 | 3.36  | 2337.1 | Allergen Len c 1.0101                                |
| <b>387</b> | RSDQENPFIFKSNRFQTLY  | 19 | 1.00  | -1.18 | 3.47  | 2389.2 | Vicilin 47k                                          |

|     |                       |    |       |       |       |        |                       |
|-----|-----------------------|----|-------|-------|-------|--------|-----------------------|
| 388 | SILEAAFNTDYEEIEKVLL   | 19 | -4.00 | 0.17  | 1.00  | 2196.1 | Allergen Len c 1.0102 |
| 389 | SVLEASLNTKYDTIEKVLL   | 19 | -1.00 | 0.20  | 0.93  | 2135.2 | Convicilin            |
| 390 | VNSVEIKEGSLLLPNYNSR   | 19 | 0.00  | -0.38 | 1.88  | 2131.1 | Allergen Len c 1.0101 |
| 391 | VSSVEINEGGLLLPHYNSR   | 19 | -0.91 | -0.18 | 1.43  | 2083.1 | Convicilin            |
| 392 | AAVDLPPVNESESEPTAKP   | 20 | -3.00 | -0.41 | 1.37  | 2063   | Histone H1            |
| 393 | AFNTEYEEIEKVLLEESEQK  | 20 | -4.99 | -1.20 | 2.78  | 2468.2 | Allergen Len c 1.0101 |
| 394 | AIVIVTVNEGKGFELVGQR   | 20 | -1.00 | 0.32  | 0.95  | 2143.2 | Allergen Len c 1.0101 |
| 395 | DLAIPVNNPGQLESFLLSGT  | 20 | -2.00 | 0.24  | 0.42  | 2084.1 | Allergen Len c 1.0102 |
| 396 | EITPEKNPQLQDLDFVNSV   | 20 | -3.00 | -0.44 | 1.81  | 2298.2 | Allergen Len c 1.0101 |
| 397 | FEITPEKNPQLQDLDFVNS   | 20 | -3.00 | -0.51 | 1.86  | 2346.2 | Allergen Len c 1.0101 |
| 398 | FFEITPEKNPQLQDLDFVNS  | 20 | -3.00 | -0.33 | 1.54  | 2406.2 | Allergen Len c 1.0101 |
| 399 | GDAMVNILSGEAEITIEGTI  | 20 | -4.00 | 0.53  | 0.35  | 2032   | UPI00019F5083         |
| 400 | LSPGDVVIIPAGHPVSISAS  | 20 | -0.91 | 0.90  | -0.52 | 1915   | Convicilin            |
| 401 | LVNEGKGNLELVGFKNEQQE  | 20 | -2.00 | -0.90 | 2.04  | 2244.1 | Convicilin            |
| 402 | NEDVIVKVSREQIEELSKNA  | 20 | -2.00 | -0.74 | 2.95  | 2299.2 | Allergen Len c 1.0101 |
| 403 | NEGKGFELVGQRNENQQEQ   | 20 | -2.99 | -2.04 | 4.19  | 2318.1 | Allergen Len c 1.0101 |
| 404 | NFLAGEEDNVISQIQRPVKE  | 20 | -2.00 | -0.67 | 2.44  | 2285.2 | Allergen Len c 1.0101 |
| 405 | RSDQENPFIFKSNRFQTLYE  | 20 | 0.00  | -1.30 | 3.64  | 2518.2 | Vicilin 47k           |
| 406 | SRSDQENPFIFKSNRFQTLY  | 20 | 1.00  | -1.16 | 3.47  | 2476.2 | Vicilin 47k           |
| 407 | TLNEVVPLKDVVPEWVRIGF  | 20 | -1.00 | 0.42  | 0.54  | 2309.3 | Lectin                |
| 408 | AFNTEYEEIEKVLLEESEQKS | 21 | -4.99 | -1.18 | 2.81  | 2555.2 | Allergen Len c 1.0101 |
| 409 | DIFVNSVEIKEGSLLLPNYNS | 21 | -2.00 | 0.05  | 1.03  | 2350.2 | Allergen Len c 1.0101 |
| 410 | EAAFNTEYEEIEKVLLEESEQ | 21 | -6.99 | -1.03 | 2.62  | 2540.2 | Allergen Len c 1.0101 |
| 411 | EQSPGQWRPSHGKEEDEEEKE | 21 | -4.90 | -2.71 | 4.80  | 2510.1 | Convicilin            |
| 412 | FEITPEKNPQLQDLDFVNSV  | 21 | -3.00 | -0.29 | 1.58  | 2445.2 | Allergen Len c 1.0101 |
| 413 | FFEITPEKNPQLQDLDFVNS  | 21 | -3.00 | -0.35 | 1.63  | 2493.2 | Allergen Len c 1.0101 |
| 414 | NEDVIVKVSREQIEELSKNAK | 21 | -1.00 | -0.89 | 3.07  | 2427.3 | Allergen Len c 1.0101 |
| 415 | NFLAGEEDNVISQIQRPVKEL | 21 | -2.00 | -0.46 | 2.09  | 2398.2 | Allergen Len c 1.0101 |
| 416 | NFLTGSDDNVISQIENPVKEL | 21 | -3.00 | -0.40 | 1.89  | 2331.2 | Convicilin            |

|     |                             |    |       |       |       |        |                       |
|-----|-----------------------------|----|-------|-------|-------|--------|-----------------------|
| 417 | NNPGQLESFLLSGTQNQPSFL       | 21 | -1.00 | -0.51 | 1.36  | 2290.1 | Allergen Len c 1.0102 |
| 418 | VTSYTLNEVVPLKDVVPEWVR       | 21 | -1.00 | 0.13  | 1.03  | 2442.3 | Lectin                |
| 419 | AFNTDYEEIEKVLLEDQEQEPQ      | 22 | -6.99 | -1.30 | 3.01  | 2666.2 | Allergen Len c 1.0102 |
| 420 | ASSNLNLLGFGINAENNERNFL      | 22 | -1.00 | -0.27 | 1.78  | 2406.2 | Convicilin            |
| 421 | DIFVNSVEIKEGSLLLPNYNSR      | 22 | -1.00 | -0.16 | 1.66  | 2506.3 | Allergen Len c 1.0101 |
| 422 | EAAFNTYEYEEIEKVLLEEQEQK     | 22 | -5.99 | -1.16 | 2.76  | 2668.3 | Allergen Len c 1.0101 |
| 423 | EITPEKNPQLQDLDFVNSVEI       | 22 | -4.00 | -0.35 | 1.73  | 2540.3 | Allergen Len c 1.0101 |
| 424 | EQSPGQWRPSHGKEEDEEEKEQ      | 22 | -4.90 | -2.75 | 4.83  | 2638.2 | Convicilin            |
| 425 | FFEITPEKNPQLQDLDFVNSV       | 22 | -3.00 | -0.15 | 1.37  | 2592.3 | Allergen Len c 1.0101 |
| 426 | KELAFPGSAQEVDRLLLENQKQS     | 22 | -1.00 | -1.00 | 2.68  | 2486.3 | Vicilin               |
| 427 | SGFSKNILEAAFNTYEYEEIEKV     | 22 | -2.99 | -0.46 | 1.76  | 2517.2 | Allergen Len c 1.0101 |
| 428 | SLNTKYDTIEKVLLEEQENEPH      | 22 | -3.90 | -1.25 | 2.83  | 2628.3 | Convicilin            |
| 429 | TVNEGKGFELVGQRNENQQEQ       | 22 | -2.99 | -1.70 | 3.74  | 2518.2 | Allergen Len c 1.0101 |
| 430 | DLDIFVNSVEIKEGSLLLPNYNS     | 23 | -3.00 | 0.06  | 1.10  | 2578.3 | Allergen Len c 1.0101 |
| 431 | EAAFNTYEYEEIEKVLLEEQEQKS    | 23 | -5.99 | -1.15 | 2.78  | 2755.3 | Allergen Len c 1.0101 |
| 432 | EITPEKNPQLQDLDFVNSVEIK      | 23 | -3.00 | -0.51 | 1.90  | 2668.4 | Allergen Len c 1.0101 |
| 433 | FEITPEKNPQLQDLDFVNSVEI      | 23 | -4.00 | -0.22 | 1.53  | 2687.4 | Allergen Len c 1.0101 |
| 434 | LSPGDVVIIPAGHPVSIASSNL      | 23 | -0.91 | 0.76  | -0.23 | 2229.2 | Convicilin            |
| 435 | SLNTKYDTIEKVLLEEQENEPHQ     | 23 | -3.90 | -1.35 | 2.95  | 2756.4 | Convicilin            |
| 436 | EAAFNTDYEEIEKVLLEDQEQEPQ    | 24 | -7.99 | -1.26 | 2.97  | 2866.3 | Allergen Len c 1.0102 |
| 437 | EASLNTKYDTIEKVLLEEQENEPH    | 24 | -4.90 | -1.22 | 2.80  | 2828.4 | Convicilin            |
| 438 | FEITPEKNPQLQDLDFVNSVEIK     | 24 | -3.00 | -0.37 | 1.69  | 2815.5 | Allergen Len c 1.0101 |
| 439 | LSPGDVVIIPAGHPVSIASSNLN     | 24 | -0.91 | 0.58  | 0.06  | 2343.2 | Convicilin            |
| 440 | LVNEGKGNLELVGFKNEQQEREDN    | 24 | -2.99 | -1.37 | 3.24  | 2758.4 | Convicilin            |
| 441 | NILEAAFNTYEYEEIEKVLLEEQEQ   | 24 | -6.99 | -0.70 | 2.16  | 2880.4 | Allergen Len c 1.0101 |
| 442 | SKPHTIFLPQFTDADFILVVLVLSGK  | 24 | 0.09  | 0.45  | 0.26  | 2672.5 | Allergen Len c 1.0101 |
| 443 | SKPHTIFLPQQTADADFILVVLVLSGK | 24 | 0.09  | 0.19  | 0.62  | 2653.4 | Vicilin               |
| 444 | VTSYTLNEVVPLKDVVPEWVRIGF    | 24 | -1.00 | 0.40  | 0.54  | 2759.5 | Lectin                |
| 445 | AIVVLLVNEGKGNLELVGFKNEQQE   | 25 | -2.00 | 0.02  | 0.84  | 2739.5 | Convicilin            |



|            |                            |    |       |       |      |        |                       |
|------------|----------------------------|----|-------|-------|------|--------|-----------------------|
| <b>446</b> | DLAIPVNNPGQLESFLLSGTQNQPS  | 25 | -2.00 | -0.33 | 1.18 | 2638.3 | Allergen Len c 1.0102 |
| <b>447</b> | EASLNTKYDTIEKVLLEEQENEPHQ  | 25 | -4.90 | -1.31 | 2.91 | 2956.4 | Convicilin            |
| <b>448</b> | FFEITPEKNPQLQDLDFVNSVEIK   | 25 | -3.00 | -0.24 | 1.51 | 2962.5 | Allergen Len c 1.0101 |
| <b>449</b> | FGKFFEITPEKNPQLQDLDFVNSV   | 25 | -2.00 | -0.19 | 1.27 | 2924.5 | Allergen Len c 1.0101 |
| <b>450</b> | KSKPHTIFLPQFTDADFILVVLGK   | 25 | 1.09  | 0.28  | 0.47 | 2800.6 | Allergen Len c 1.0101 |
| <b>451</b> | NILEAAFNTYEYEEIEKVLLEEQEQK | 25 | -5.99 | -0.83 | 2.30 | 3008.5 | Allergen Len c 1.0101 |
| <b>452</b> | SILEAAFNTDYEEIEKVLLEDQEQE  | 25 | -7.99 | -0.71 | 2.37 | 2954.4 | Allergen Len c 1.0102 |
| <b>453</b> | TETTSFSITKFSPDQKNLIFQGDGY  | 25 | -1.00 | -0.66 | 1.92 | 2823.4 | Lectin                |

***Peptides identified only in basolateral fluids***

| <b>Identifying number</b> | <b>Sequence</b> | <b>Length</b> | <b>Net Charge</b> | <b>Hydrophobicity index</b> | <b>Boman Index</b> | <b>Mass</b> | <b>Leading razor protein</b> |
|---------------------------|-----------------|---------------|-------------------|-----------------------------|--------------------|-------------|------------------------------|
| <b>1</b>                  | EKIPGTEQS       | 9             | -1.00             | -1.49                       | 2.76               | 987.5       | Dehydrin a                   |
| <b>2</b>                  | ETWNPNHPE       | 9             | -1.91             | -2.44                       | 3.53               | 1122.5      | Legumin B                    |
| <b>3</b>                  | LANRDDNED       | 9             | -3.00             | -2.21                       | 6.05               | 1060.4      | Allergen Len c 1.0101        |
| <b>4</b>                  | NTNYEEIEK       | 9             | -2.00             | -2.10                       | 4.12               | 1138.5      | Beta-lathyrin 1              |
| <b>5</b>                  | VNEGKGDPE       | 9             | -2.00             | -1.30                       | 2.85               | 993.4       | Allergen Len c 1.0101        |
| <b>6</b>                  | EEVKVEVEDD      | 10            | -4.99             | -1.23                       | 3.81               | 1189.5      | Heat shock protein           |
| <b>7</b>                  | LANRDDNEDL      | 10            | -3.00             | -1.61                       | 4.95               | 1173.5      | Allergen Len c 1.0101        |
| <b>8</b>                  | LEDQEQEPQH      | 10            | -3.91             | -2.55                       | 4.55               | 1251.5      | Allergen Len c 1.0102        |
| <b>9</b>                  | NAAWDPSNKE      | 10            | -1.00             | -1.76                       | 3.18               | 1130.5      | Lectin                       |
| <b>10</b>                 | QVEEQTEEKD      | 10            | -3.99             | -2.49                       | 5.11               | 1233.5      | Convicilin                   |
| <b>11</b>                 | SFNTGYEEIE      | 10            | -3.00             | -0.99                       | 2.43               | 1187.5      | Vicilin                      |
| <b>12</b>                 | EDNDFETKIDT     | 11            | -4.00             | -1.73                       | 4.47               | 1325.6      | p54 protein                  |
| <b>13</b>                 | EVESSDTIDNV     | 11            | -4.00             | -0.63                       | 3.10               | 1206.5      | Polyubiquitin                |
| <b>14</b>                 | FNTDYEEIEKV     | 11            | -3.00             | -1.08                       | 2.92               | 1385.6      | Allergen Len c 1.0102        |
| <b>15</b>                 | GTKPEYGSTNT     | 11            | 0.00              | -1.59                       | 2.58               | 1153.5      | Dehydrin a                   |
| <b>16</b>                 | LTGSDDNVISQ     | 11            | -2.00             | -0.38                       | 2.20               | 1147.5      | Convicilin                   |
| <b>17</b>                 | QTLYENENGHI     | 11            | -1.91             | -1.35                       | 2.64               | 1316.6      | Vicilin 47k                  |
| <b>18</b>                 | ALEPDHRVESEA    | 12            | -2.91             | -1.04                       | 3.30               | 1351.6      | Legumin B                    |

|           |                 |    |       |       |      |        |                                                      |
|-----------|-----------------|----|-------|-------|------|--------|------------------------------------------------------|
| <b>19</b> | DALEPDNRIESE    | 12 | -4.00 | -1.48 | 4.27 | 1386.6 | N-terminal incomplete legumin A1 pre-pro-polypeptide |
| <b>20</b> | EGSLLLPNYNSR    | 12 | 0.00  | -0.71 | 2.19 | 1361.7 | Allergen Len c 1.0101                                |
| <b>21</b> | FLTGSDDNVISQ    | 12 | -2.00 | -0.12 | 1.77 | 1294.6 | Convicilin                                           |
| <b>22</b> | KVLLEDQEQEPQ    | 12 | -3.00 | -1.52 | 3.12 | 1454.7 | Allergen Len c 1.0102                                |
| <b>23</b> | NDDEGSEPRVPG    | 12 | -3.00 | -1.88 | 4.18 | 1270.5 | Convicilin                                           |
| <b>24</b> | TVLSPNDRNSYN    | 12 | 0.00  | -1.31 | 3.68 | 1378.6 | Convicilin                                           |
| <b>25</b> | YNAAWDPSNKER    | 12 | 0.00  | -1.95 | 3.91 | 1449.7 | Lectin                                               |
| <b>26</b> | GKFFEITPEKNPQ   | 13 | 0.00  | -1.23 | 2.13 | 1533.8 | Allergen Len c 1.0101                                |
| <b>27</b> | LEPDNRIESEGGL   | 13 | -3.00 | -1.01 | 2.88 | 1427.7 | N-terminal incomplete legumin A1 pre-pro-polypeptide |
| <b>28</b> | NALEPDHRVESEA   | 13 | -2.91 | -1.23 | 3.55 | 1465.7 | Legumin B                                            |
| <b>29</b> | NIGSSSSPDIYNP   | 13 | -1.00 | -0.74 | 1.92 | 1349.6 | N-terminal incomplete legumin A1 pre-pro-polypeptide |
| <b>30</b> | REESDEEEEEQEEE  | 13 | -8.99 | -3.37 | 7.22 | 1665.6 | Beta-lathyrin 1                                      |
| <b>31</b> | SVSSESEPFNLRS   | 13 | -1.00 | -0.75 | 3.10 | 1437.7 | Allergen Len c 1.0101                                |
| <b>32</b> | VFEDNDFETKIDT   | 13 | -4.00 | -0.92 | 3.25 | 1571.7 | p54 protein                                          |
| <b>33</b> | VVEEEEGEWRSQ    | 13 | -3.99 | -1.51 | 3.51 | 1532.7 | Convicilin                                           |
| <b>34</b> | YLVNPDDEEDLRV   | 13 | -4.00 | -0.95 | 3.35 | 1575.7 | Convicilin                                           |
| <b>35</b> | YQHEGKEETSSE    | 13 | -3.90 | -2.47 | 4.49 | 1551.6 | Convicilin                                           |
| <b>36</b> | ALEPDNRIESEGGL  | 14 | -3.00 | -0.81 | 2.55 | 1498.7 | N-terminal incomplete legumin A1 pre-pro-polypeptide |
| <b>37</b> | DALEPDNRIESEGG  | 14 | -4.00 | -1.33 | 3.52 | 1500.7 | N-terminal incomplete legumin A1 pre-pro-polypeptide |
| <b>38</b> | KVVEEEEGEWRSQ   | 14 | -2.99 | -1.68 | 3.66 | 1660.8 | Convicilin                                           |
| <b>39</b> | LVNPDDEEDLRVVD  | 14 | -5.00 | -0.74 | 3.44 | 1626.8 | Convicilin                                           |
| <b>40</b> | NLERGDTIKLPAGT  | 14 | 0.00  | -0.63 | 2.10 | 1483.8 | Allergen Len c 1.0101                                |
| <b>41</b> | LDALEPDNRIESEGG | 15 | -4.00 | -0.99 | 2.96 | 1613.8 | N-terminal incomplete legumin A1 pre-pro-polypeptide |
| <b>42</b> | NDDEGSEPRVPGQRE | 15 | -3.00 | -2.27 | 5.16 | 1683.7 | Convicilin                                           |

|           |                     |    |       |       |      |        |                                                      |
|-----------|---------------------|----|-------|-------|------|--------|------------------------------------------------------|
| <b>43</b> | SLTDTGSSNNQLDQM     | 15 | -2.00 | -1.05 | 2.93 | 1609.7 | N-terminal incomplete legumin A1 pre-pro-polypeptide |
| <b>44</b> | DALEPDNRIESEGLI     | 16 | -4.00 | -0.64 | 2.47 | 1726.8 | N-terminal incomplete legumin A1 pre-pro-polypeptide |
| <b>45</b> | ENDDEEEQEETSTQVQ    | 17 | -8.99 | -2.56 | 5.46 | 2037.8 | Allergen Len c 1.0102                                |
| <b>46</b> | HAGDLGNINVGDDGTVS   | 17 | -2.91 | -0.31 | 1.56 | 1639.7 | Superoxide dismutase, EC 1.15.1.1                    |
| <b>47</b> | KEDEEKVVEEEEGEWRGS  | 18 | -5.99 | -2.11 | 4.46 | 2163   | Convicilin                                           |
| <b>48</b> | KEDEEKVVEEEEGEWRGSQ | 19 | -5.99 | -2.18 | 4.52 | 2291   | Convicilin                                           |

Supplementary Figure 1. Parental proteins of peptides in the bioaccessible (A) and basolateral fraction (B) of unfermented and fermented samples. UNF= unfermented; SSFt48= solid-state fermented with *L. plantarum* for 48 h, SSFt72= solid-state fermented for 72 h. Peptides were included in the category only if identified in at least 2/3 biological replicates.

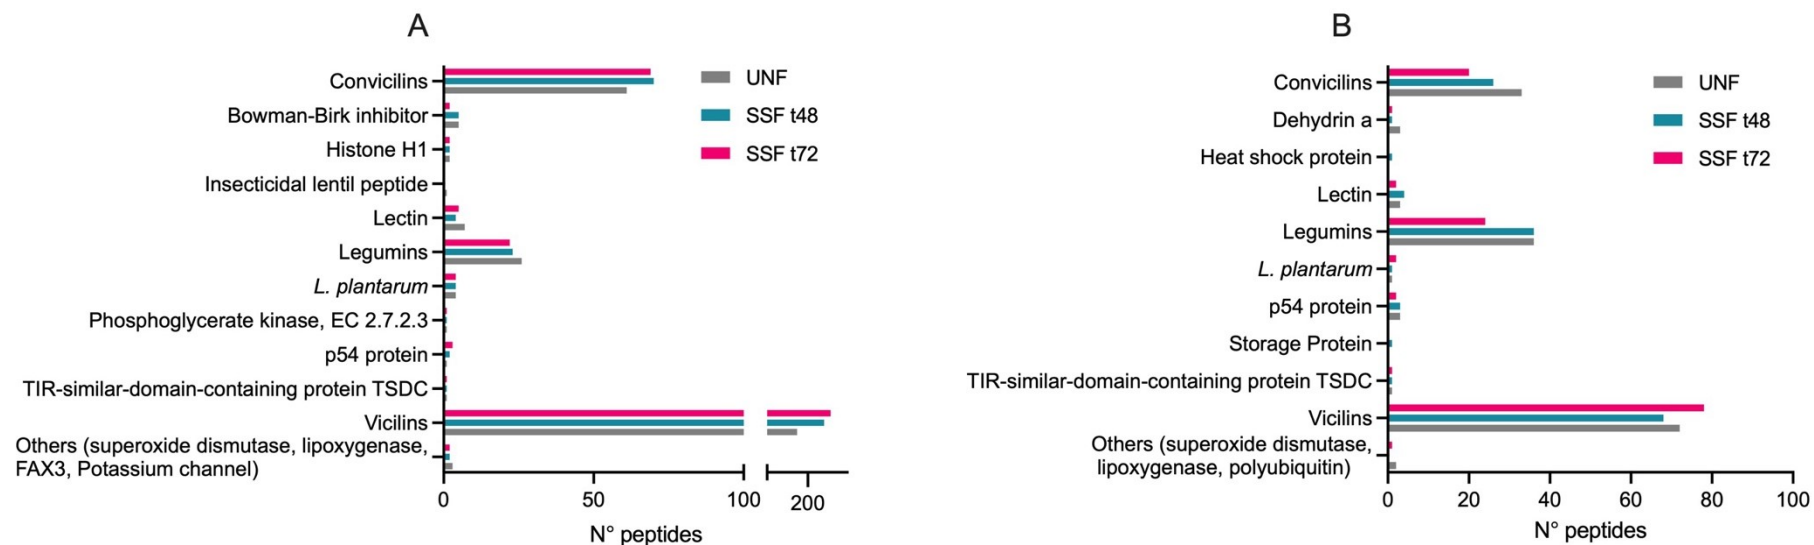



Supplementary Figure 2. Concentration of total phenolic content (A, B) and peptides content (C, D) in the apical (AP) and basolateral (BL) fluids after incubation with 100 mg/mL and 500 mg/mL of digest. A: TPC, 100mg/mL digest. B: TPC, 500 mg/mL digest. C: peptides content in digest and AP fluids. D: peptide content in BL fluids. Results are shown as mean values  $\pm$  SD of three independent replicates.

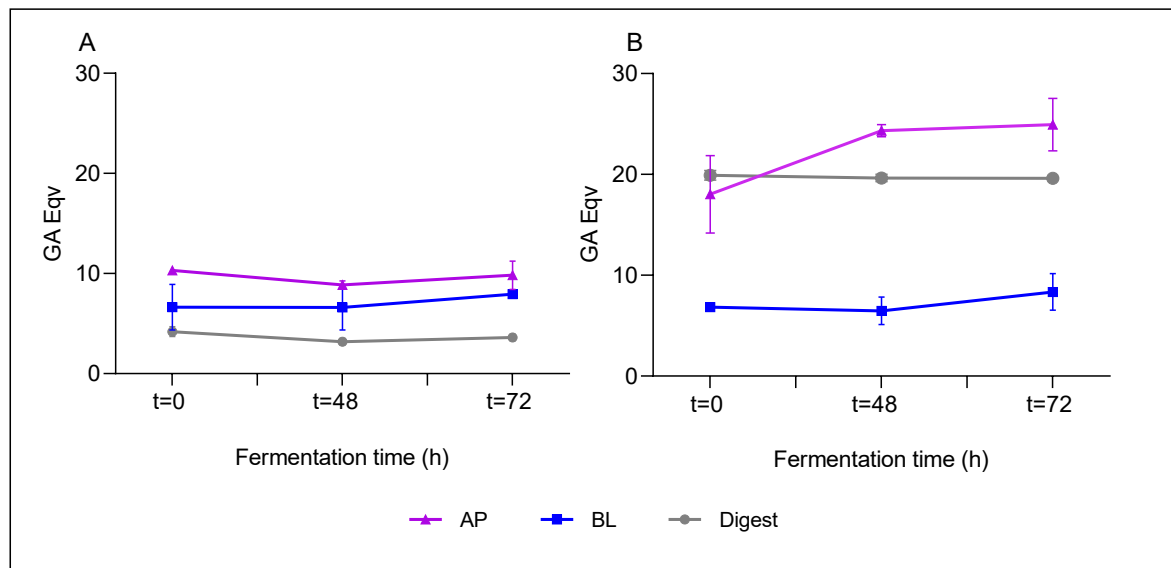

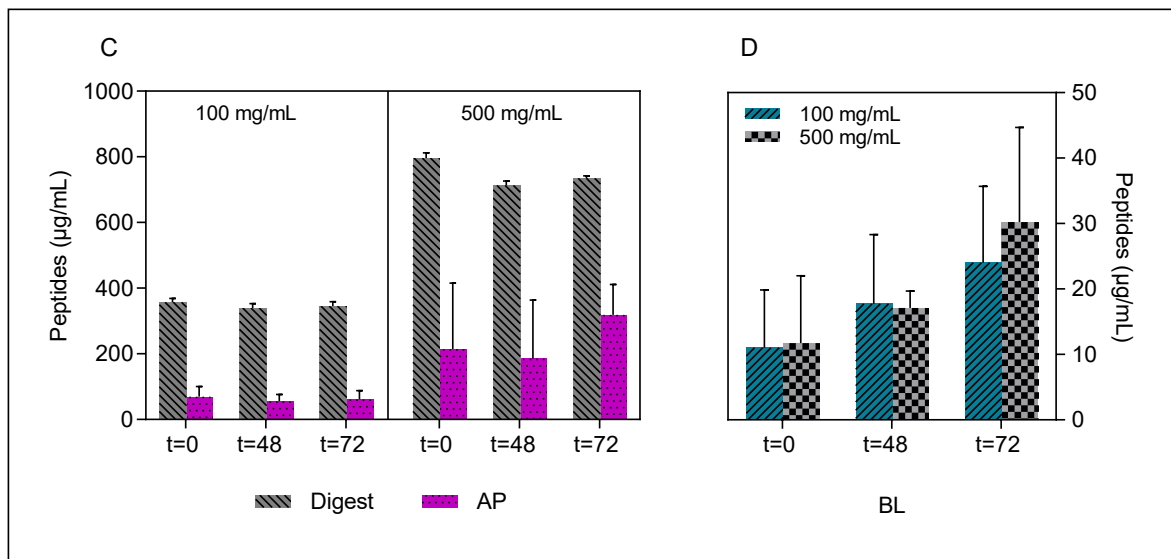

Supplementary Table 2. Content of peptides in apical (AP) and basolateral (BL) fluids after 2 hours incubation with green lentil digest pre-fermented for 0, 48, 72 hours. Values are expressed as percentage relative to the initial content present in the digest.

| Location | Concentration Digest | t= 0 h | t= 48 h | t=72h  |
|----------|----------------------|--------|---------|--------|
| AP       | 100                  | 79.9 % | 74.5 %  | 67.6 % |
|          | 500                  | 48.3 % | 48.3 %  | 62.4 % |
| BL       | 100                  | 7.3 %  | 10.9 %  | 17.2 % |
|          | 500                  | 1.6 %  | 2.7 %   | 4.9 %  |

Supplementary Figure 3. Representation of the facilitated (Na-dependent) model of dietary glucose absorption in the small intestine. Intestinal glucose transport is a concentration-dependent process mediated by two transporters, the sodium-dependent glucose transporter (SGLT1) on the apical side and the sodium-independent glucose transporter 2 (GLUT2) on the basolateral side. Before a meal and with low level of luminal glucose, SGLT1 is the major regulator of glucose transport in the enterocytes. GLUT2 is primarily located at the basolateral membrane and balances glucose between blood and enterocytes. After meal consumption, when there is high glucose concentration at the apical side of epithelial cells, the amount of apical GLUT2 is greatly increased and it becomes the major regulator of intestinal glucose absorption. Figure created with Biorender and adapted from Kellett and Brot-Laroche.<sup>10</sup>

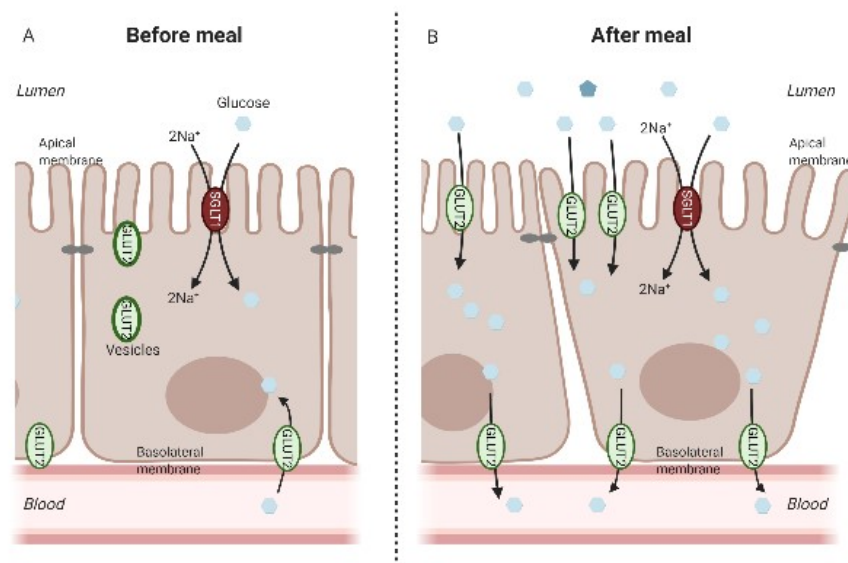

Supplement: d4fo03326d6.pdf [file d4fo03326d6.pdf]
