# Supplementary material for: Solid-state fermentation of green lentils by Lactiplantibacillus plantarum leads to formation of distinct peptides that are absorbable and enhances DPP-IV inhibitory activity in an intestinal Caco-2 cell model
Source: Royal Society of Chemistry journal article supplement (doi:10.1039/d4fo03326d), 2024-01-01
Supplement: d4fo03326d1.xlsx [file d4fo03326d1.xlsx]

## Sheet: GLU TRANSPORT
STANDARD CURVE
			X= (Y-0.0238)/0.0478
					[500 mg/ mL]								[100 mg/ mL]					STANDARDS
RESULTS					GLU content (mg/dL)								GLU content (mg/dL)																Amount of Glucose added (mg/dL)	360.312
Sample	ID	Incubation time	AP / BL	Dilution	Plate D	Plate C	Plate E	Plate I	AVG				Plate G	Plate H	Plate N						Repl.1 (Plate O)	Repl.2 (Plate O)	Repl.3 (Plate P)	Repl.4 (Plate P)	AVG	STD			TOT Glucose (AP +BL)				GLU Uptake
	FLUIDS					248.221																							Repl.1	Repl.2	Repl.3	Repl.4	Repl.1	Repl.2	Repl.3	Repl.4
A1+B1	DMEM	2 h	AP	25	235.883	246.024	246.076	246.547	243.633				283.472	276.15	285.668			SITAGLIPTIN	2h	AP	275.051	269.978	266.892	266.003	269.481	3.53807		Sitagliptin (2h)	285.48	281.717	277.459	280.861	74.8319	78.5955	82.8528	79.4509
C1+D1	GL_t0	2 h	AP	25	225.177	239.356	264.408	220.24	237.295				272.698	273.299	287.054				24h	AP	33.9948	27.75	27.5199	26.0816	28.8366	3.04595		Sitagliptin (24h)	206.462	188.136	156.729	179.59	153.85	172.176	203.583	180.722
A2+B2	GL_t48	2 h	AP	25	226.374	247.855	265.428	252.065	247.93				267.468	265.872	285.616				2h	BL	10.4289	11.7385	11.8964	11.4561	11.38	0.571329
C2+D2	GL_t72	2 h	AP	25	243.77	250.11	264.146	255.098	253.281				271.338	264.905	282.373				24h	BL	172.468	160.386	129.209	153.508	153.893	15.7846		Phloretin (2h)	272.403	278.218	262.715	267.155	87.9093	82.0944	97.5965	93.1572
																												Phloretin (24h)	204.914	226.933	206.546	203.073	155.398	133.379	153.766	157.239
																		PHLORETIN	2h	AP	261.95	267.311	251.202	255.098	258.89	6.19988
	DMEM	24 h	AP	5				4.97803	4.97803				20.522	4.47071	21.3326				24h	AP	33.4979	38.2992	34.5126	34.319	35.1572	1.8536
C4+D4	GL_t0	24 h	AP	5	12.0701	15.6475		8.80126	12.1729				18.2887	4.55962	27.2584				2h	BL	10.4529	10.9069	11.5136	12.0565	11.2325	0.606571
A5+B5	GL_t48	24 h	AP	5	14.3243	15.4174		11.9393	13.8937				16.3745	5.29707	25.8672				24h	BL	171.416	188.634	172.033	168.754	175.209	7.84794
C5+D5	GL_t72	24 h	AP	5	22.7552	14.0157		10.7782	15.8497				18.3776	5.29707	27.023
	FLUIDS					18.273			18.273
A1+B1	DMEM	2 h	BL	5	18.9174	16.6109	14.8964	14.1538	16.1446				14.2856	14.318	13.681
C1+D1	GL_t0	2 h	BL		17.8441	17.1914	14.7678	14.0638	15.9668				14.8797	15.4487	12.1695
A2+B2	GL_t48	2 h	BL		17.4927	19.2385	14.5324	14.4017	16.4163				14.6956	15.1077	12.1224
C2+D2	GL_t72	2 h	BL		16.3337	18.2751	15.7458	14.4163	16.1927				14.8002	15.181	13.1695					BL						AP
																				GL_t0	GL_t48	GL_t72	Phloretin	DMEM		GL_t0	GL_t48	GL_t72	Phloretin	DMEM
																			2 h	17.8441	17.4927	16.3337	10.4529	18.9174	2 h	225.177	226.374	243.77	261.95	235.883
	DMEM	24 h	BL	5				16.3431	16.3431				26.7929	16.6831	31.1914				2 h	17.1914	19.2385	18.2751	10.9069	16.6109	2 h	239.356	247.855	250.11	267.311	246.024
C4+D4	GL_t0	24 h	BL	5	35.8253	27.1224	26.5157	20.9247	27.597				28.5816	16.2908	34.6172				2 h	14.7678	14.5324	15.7458	11.5136	14.8964	2 h	264.408	265.428	264.146	251.202	246.076
A5+B5	GL_t48	24 h	BL	5	33.9006	26.228	22.5774	24.6172	26.8308				27.7605	18.477	33.1109				2 h	14.0638	14.4017	14.4163	12.0565	14.1538	2 h	220.24	252.065	255.098	255.098	246.547
C5+D5	GL_t72	24 h	BL	5	29.7793	26.568	18.8431	22.8128	24.5008				28.9843	18.0533	33.8379				24 h	35.8253	33.9006	29.7793	204.914	16.3431	24 h	12.0701	14.3243	22.7552	33.4979	4.97803
																			24 h	27.1224	26.228	26.568	226.933	26.7929	24 h	15.6475	15.4174	14.0157	38.2992	20.522
																			24 h	26.5157	22.5774	18.8431	206.546	16.6831	24 h				34.5126	4.47071
																			24 h	23.61	24.6172	22.8128	203.073	31.1914	24 h	8.80126	11.9393	10.7782	34.319	21.3326
		*Plates M (500), N(100), O(100), standards to run!!
GLUCOSE TRANSPORT (%)
					% ↓ Glucose transport		% ↓ Glucose transport		% ↓ Glucose transport		% ↓ Glucose transport	AVG
GL_t0	24 h	BL	5	35.8253		27.1224		26.5157		20.9247
GL_t48	24 h	BL	5	33.9006	5.37242	26.228	3.29747	22.5774	14.8527	24.6172	0	5.88064
GL_t72	24 h	BL	5	29.7793	16.8764	26.568	2.04405	18.8431	28.9361	22.8128	0	11.9641
GLUCOSE UPTAKE (%)
Amount of Glucose added (mg/dL)	360.312
			AVG Glucose Content	Sum Glucose (in AP + BL)	Glucose Uptake
FLUIDS			248.221	266.494	93.8183
DMEM	2 h	AP	243.633	259.777	100.535
GL_t0	2 h	AP	237.295	253.262	107.05
GL_t48	2 h	AP	247.93	264.347	95.9652
GL_t72	2 h	AP	253.281	269.474	90.8381			Glucose Uptake
CH_t0	2 h	AP	256.891	272.022	88.2904				mg/dL		%
CH_t3	2 h	AP	254.656	271.03	89.282				2 h	24 h	2 h	24 h
DMEM	24 h	AP	4.97803	21.3211	338.991			DMEM	100.535	338.991	27.9022	94.0826
GL_t0	24 h	AP	12.1729	39.77	320.542			GL_t0	107.05	320.542	29.7104	88.9624
GL_t48	24 h	AP	13.8937	40.7245	319.588			GL_t48	95.9652	319.588	26.6339	88.6974
GL_t72	24 h	AP	15.8497	40.3505	319.961			GL_t72	90.8381	319.961	25.211	88.8012
CH_t0	24 h	AP	21.16	48.3373	311.975			CH_t0	88.2904	311.975	24.5039	86.5846
CH_t3	24 h	AP	19.4733	46.0126	314.299			CH_t3	89.282	314.299	24.7791	87.2298
								Phloretin	90.1894	142.103	25.0309	39.4388
FLUIDS			18.273
DMEM	2 h	BL	16.1446
GL_t0	2 h	BL	15.9668
GL_t48	2 h	BL	16.4163
GL_t72	2 h	BL	16.1927
CH_t0	2 h	BL	15.1311
CH_t3	2 h	BL	16.3745
DMEM	24 h	BL	16.3431
GL_t0	24 h	BL	27.597
GL_t48	24 h	BL	26.8308
GL_t72	24 h	BL	24.5008
CH_t0	24 h	BL	27.1773
CH_t3	24 h	BL	26.5392
Phloretin	261.95	2hr	AP	Tot Glucose			Glucose Uptake	AVG
Phloretin	267.311	2hr	AP	2hr	AP+BL	272.403	87.9093	90.1894
Phloretin	251.202	2hr	AP			278.218	82.0944
Phloretin	255.098	2hr	AP			262.715	97.5965
Phloretin	33.4979	24 hr	AP			267.155	93.1572
Phloretin	38.2992	24 hr	AP	24hr	AP+BL	204.914	155.398	149.945
Phloretin	34.5126	24 hr	AP			226.933	133.379
Phloretin	34.319	24 hr	AP			206.546	153.766
Phloretin	10.4529	2hr	BL			203.073	157.239
Phloretin	10.9069	2hr	BL
Phloretin	11.5136	2hr	BL
Phloretin	12.0565	2hr	BL
Phloretin	171.416	24 hr	BL
Phloretin	188.634	24 hr	BL
Phloretin	172.033	24 hr	BL
Phloretin	168.754	24 hr	BL

## Sheet: Plate C (500)
Application: Tecan i-control				Tecan i-control , 1.11.1.0
Device: infinite 200Pro				Serial number: 1110007777				Serial number of connected stacker:
Firmware: V_3.37_07/12_Infinite (Jul 20 2012/13.56.47)				MAI, V_3.37_07/12_Infinite (Jul 20 2012/13.56.47)
Date:	24/8/20
Time:	3:32:28 PM
System				D0149128
User				WUR\dist002
Plate				Greiner 96 Flat Bottom Transparent Polystyrene Cat. No.: 655101/655161/655192 [GRE96ft.pdfx]
Plate-ID (Stacker)
Label: Label1
Mode				Absorbance
Wavelength				510	nm
Bandwidth				9	nm
Number of Flashes				25
Settle Time				0	ms
Start Time:	24/8/20 3:32:28 PM
	Temperature: 25.4 °C
<>	1	2	3	4	5	6	7	8	9	10	11	12
A	0.4736	0.4691	0.1523	0.152	0.2608	0.2673	0.569	0.5707	0.062	0.063	0.7646	0.7669
B	0.4815	0.4696	0.1383	0.1392	0.2545	0.2565	0.5829	0.5851	0.0623	0.063	0.7927	0.8015
C	0.4367	0.4805	0.8169	0.8187	0.2571	0.2604	0.5778	0.5756	0.0722	0.0736	0.184	0.1824
D	0.481	0.4687	0.8844	0.9101	0.0501	0.0523	0.5717	0.5801	0.055	0.0567	0.1807	0.1793
E	2.0969	2.0407	0.8378	0.8533	0.0447	0.0474	0.5865	0.588	0.8043	0.8043	0.2066	0.2035
F	0.0555	0.0527	0.9433	0.9435	0.0448	0.0449	0.5697	0.5633	0.853	0.8581	0.2028	0.2
G	0.0487	0.0513	0.8939	0.9008	0.0452	0.0457	0.0907	0.0522	0.8444	0.86	0.2253	0.2223
H	0.1548	0.1539	0.0501	0.0493	0.0448	0.0449	0.0555	0.0545	0.8315	0.8423	0.1706	0.1732
End Time:	24/8/20 3:33:44 PM
				Hours	Dilution	Abs		Corrected by dilution		AVG	GLU content
A1+B1	DMEM	500	AP	2	25	0.4736	0.4691	11.84	11.7275	11.7837	246.024
C1+D1	FLUIDS	500	AP	2	25	0.4815	0.4696	12.0375	11.74	11.8887	248.221
A2+B2	GL_t0	500	AP	2	25	0.4367	0.4805	10.9175	12.0125	11.465	239.356
C2+D2	GL_t48	500	AP	2	25	0.481	0.4687	12.025	11.7175	11.8712	247.855
A3+B3	GL_t72	500	AP	2	25	2.0969	2.0407	52.4225	51.0175	51.72	1081.51
A5	GL_t0	500	AP	24	5	0.1548	0.1539	0.774	0.7695	0.77175	15.6475
C5+D5	GL_t48	500	AP	24	5	0.1523	0.152	0.7615	0.76	0.76075	15.4174
A6+B6	GL_t72	500	AP	24	5	0.1383	0.1392	0.6915	0.696	0.69375	14.0157
A1+B1	DMEM	500	BL	2		0.8169	0.8187			0.8178	16.6109
C1+D1	FLUIDS	500	BL	2		0.8844	0.9101			0.89725	18.273
A2+B2	GL_t0	500	BL	2		0.8378	0.8533			0.84555	17.1914
C2+D2	GL_t48	500	BL	2		0.9433	0.9435			0.9434	19.2385
A3+B3	GL_t72	500	BL	2		0.8939	0.9008			0.89735	18.2751
A5	GL_t0	500	BL	24	5	0.2608	0.2673	1.304	1.3365	1.32025	27.1224
C5+D5	GL_t48	500	BL	24	5	0.2545	0.2565	1.2725	1.2825	1.2775	26.228
A6+B6	GL_t72	500	BL	24	5	0.2571	0.2604	1.2855	1.302	1.29375	26.568

## Sheet: Plate E (500)
Application: Tecan i-control				Tecan i-control , 1.11.1.0
Device: infinite 200Pro				Serial number: 1110007777				Serial number of connected stacker:
Firmware: V_3.37_07/12_Infinite (Jul 20 2012/13.56.47)				MAI, V_3.37_07/12_Infinite (Jul 20 2012/13.56.47)
Date:	23/8/20
Time:	11:57:17 AM
System				D0149128
User				WUR\dist002
Plate				Greiner 96 Flat Bottom Transparent Polystyrene Cat. No.: 655101/655161/655192 [GRE96ft.pdfx]
Plate-ID (Stacker)
Label: Label1
Mode				Absorbance
Wavelength				510	nm
Bandwidth				9	nm
Number of Flashes				25
Settle Time				0	ms
Start Time:	23/8/20 11:57:17 AM
	Temperature: 22 °C
<>	1	2	3	4	5	6	7	8	9	10	11	12
A	1.0643	1.0537	0.4099	0.4105	0.4755	0.4674	0.7305	0.7412	0.0474	0.0481	0.0479	0.0474
B	1.1012	1.0991	0.4004	0.4057	0.5086	0.5044	0.7317	0.7277	0.1334	0.1339	0.255	0.2615
C	1.0425	1.0843	0.3611	0.349	0.5117	0.5052	0.7152	0.7217	0.0866	0.0864	0.2186	0.2226
D	1.1474	1.1749	0.3856	0.3858	0.5114	0.5006	0.7722	0.7807	0.0622	0.0615	0.1823	0.1875
E	0.9982	1.0512	0.3837	0.4176	0.5311	0.5238	0.6731	0.718	0.0464	0.0462	0.0459	0.0458
F	1.0234	1.0242	0.0427	0.0461	0.5397	0.5338	0.8113	0.8196	0.0483	0.0464	0.0467	0.0467
G	0.0471	0.0458	0.0473	0.0473	0.0477	0.0462	0.0468	0.0478	0.0471	0.0463	0.0461	0.0471
H	0.0472	0.0466	0.0465	0.0465	0.0466	0.0463	0.0462	0.047	0.0463	0.0486	0.0472	0.0469
End Time:	23/8/20 11:58:34 AM
		Hours		Dilution	Abs		Corrected by dilution		AVG	GLU content
A1+B1	DMEM	2	AP	25	0.4755	0.4674	11.8875	11.685	11.7863	246.076
C1+D1	GL_t0	2	AP	25	0.5086	0.5044	12.715	12.61	12.6625	264.408
A2+B2	GL_t48	2	AP	25	0.5117	0.5052	12.7925	12.63	12.7113	265.428
D2	GL_t72	2	AP	25	0.5114	0.5006	12.785	12.515	12.65	264.146
A3+B3	CH_t0	2	AP	25	0.5311	0.5238	13.2775	13.095	13.1862	275.365
C3+D3	CH_t3	2	AP	25	0.5397	0.5338	13.4925	13.345	13.4187	280.229
C4+D4	GL_t0	24	AP	5	0.1334	0.1339	TO REPEAT! (old enzyme)
A5+B5	GL_t48	24	AP	5	0.0866	0.0864	TO REPEAT! (old enzyme)
D6	GL_t72	24	AP	5	0.0622	0.0615	TO REPEAT! (old enzyme)
A1+B1	DMEM	2	BL		0.7305	0.7412			0.73585	14.8964
C1+D1	GL_t0	2	BL		0.7317	0.7277			0.7297	14.7678
A2+B2	GL_t48	2	BL		0.7152	0.7217			0.71845	14.5324
D2	GL_t72	2	BL		0.7722	0.7807			0.77645	15.7458
A3+B3	CH_t0	2	BL		0.6731	0.718			0.69555	14.0533
C3+D3	CH_t3	2	BL		0.8113	0.8196			0.81545	16.5617
C4+D4	GL_t0	24	BL	5	0.255	0.2615	1.275	1.3075	1.29125	26.5157
A5+B5	GL_t48	24	BL	5	0.2186	0.2226	1.093	1.113	1.103	22.5774
D6	GL_t72	24	BL	5	0.1823	0.1875	0.9115	0.9375	0.9245	18.8431

## Sheet: Plate I (500)
Application: Tecan i-control				Tecan i-control , 1.11.1.0
Device: infinite 200Pro				Serial number: 1110007777				Serial number of connected stacker:
Firmware: V_3.37_07/12_Infinite (Jul 20 2012/13.56.47)				MAI, V_3.37_07/12_Infinite (Jul 20 2012/13.56.47)
Date:	24/8/20
Time:	4:33:24 PM
System				D0149128
User				WUR\dist002
Plate				Greiner 96 Flat Bottom Transparent Polystyrene Cat. No.: 655101/655161/655192 [GRE96ft.pdfx]
Plate-ID (Stacker)
Label: Label1
Mode				Absorbance
Wavelength				510	nm
Bandwidth				9	nm
Number of Flashes				25
Settle Time				0	ms
Start Time:	24/8/20 4:33:24 PM
	Temperature: 25.1 °C
<>	1	2	3	4	5	6	7	8	9	10	11	12
A	0.0473	0.0471	0.5161	0.4286	0.7015	0.6992	0.052	0.0527	0.1604	0.1616	0.0472	0.0474
B	0.0464	0.0461	0.3437	0.5004	0.6969	0.6952	0.0881	0.0897	0.2041	0.2055	0.047	0.0466
C	0.0464	0.0464	0.4733	0.4925	0.6896	0.7348	0.1181	0.1197	0.2384	0.2418	0.0461	0.046
D	0.0454	0.046	0.4925	0.4849	0.7123	0.7135	0.1088	0.1068	0.2224	0.2233	0.0457	0.0457
E	0.0457	0.046	0.5186	0.498	0.6967	0.6953	0.1053	0.1041	0.2166	0.2212	0.0452	0.0451
F	0.0368	0.0452	0.51	0.4992	0.7339	0.7192	0.0861	0.0849	0.1898	0.1921	0.0453	0.0455
G	0.0456	0.0449	0.0487	0.0455	0.0465	0.0453	0.0455	0.0468	0.0467	0.046	0.0453	0.0463
H	0.0464	0.0458	0.0476	0.0448	0.0452	0.0452	0.0455	0.0477	0.0452	0.0467	0.0452	0.0482
End Time:	24/8/20 4:34:41 PM
					Dilution	Abs		Corrected by dilution		AVG	GLU content
A1+B1	DMEM	500	2	AP	25	0.5161	0.4286	12.9025	10.715	11.8088	246.547
C1+D1	GL_t0	500	2	AP	25	0.3437	0.5004	8.5925	12.51	10.5512	220.24
A2+B2	GL_t48	500	2	AP	25	0.4733	0.4925	11.8325	12.3125	12.0725	252.065
C2+D2	GL_t72	500	2	AP	25	0.4925	0.4849	12.3125	12.1225	12.2175	255.098
A3+B3	CH_t0	500	2	AP	25	0.5186	0.498	12.965	12.45	12.7075	265.349
C3+D3	CH_t3	500	2	AP	25	0.51	0.4992	12.75	12.48	12.615	263.414
A4	DMEM	500	24	AP	5	0.052	0.0527	0.26	0.2635	0.26175	4.97803
C4+D4	GL_t0	500	24	AP	5	0.0881	0.0897	0.4405	0.4485	0.4445	8.80126
A5+B5	GL_t48	500	24	AP	5	0.1181	0.1197	0.5905	0.5985	0.5945	11.9393
C5+D5	GL_t72	500	24	AP	5	0.1088	0.1068	0.544	0.534	0.539	10.7782
A6+B6	CH_t0	500	24	AP	5	0.1053	0.1041	0.5265	0.5205	0.5235	10.454
C6+D6	CH_t3	500	24	AP	5	0.0861	0.0849	0.4305	0.4245	0.4275	8.44561
A1+B1	DMEM	500	2	BL		0.7015	0.6992			0.70035	14.1538
C1+D1	GL_t0	500	2	BL		0.6969	0.6952			0.69605	14.0638
A2+B2	GL_t48	500	2	BL		0.6896	0.7348			0.7122	14.4017
C2+D2	GL_t72	500	2	BL		0.7123	0.7135			0.7129	14.4163
A3+B3	CH_t0	500	2	BL		0.6967	0.6953			0.696	14.0628
C3+D3	CH_t3	500	2	BL		0.7339	0.7192			0.72655	14.7019
A4	DMEM	500	24	BL	5	0.1604	0.1616	0.802	0.808	0.805	16.3431
C4+D4	GL_t0	500	24	BL	5	0.2041	0.2055	1.0205	1.0275	1.024	20.9247
A5+B5	GL_t48	500	24	BL	5	0.2384	0.2418	1.192	1.209	1.2005	24.6172
C5+D5	GL_t72	500	24	BL	5	0.2224	0.2233	1.112	1.1165	1.11425	22.8128
A6+B6	CH_t0	500	24	BL	5	0.2166	0.2212	1.083	1.106	1.0945	22.3996
C6+D6	CH_t3	500	24	BL	5	0.1898	0.1921	0.949	0.9605	0.95475	19.4759

## Sheet: Plate G (100)
Application: Tecan i-control				Tecan i-control , 1.11.1.0
Device: infinite 200Pro				Serial number: 1110007777				Serial number of connected stacker:
Firmware: V_3.37_07/12_Infinite (Jul 20 2012/13.56.47)				MAI, V_3.37_07/12_Infinite (Jul 20 2012/13.56.47)
Date:	24/8/20
Time:	2:42:55 PM
System				D0149128
User				WUR\dist002
Plate				Greiner 96 Flat Bottom Transparent Polystyrene Cat. No.: 655101/655161/655192 [GRE96ft.pdfx]
Plate-ID (Stacker)
Label: Label1
Mode				Absorbance
Wavelength				510	nm
Bandwidth				9	nm
Number of Flashes				25
Settle Time				0	ms
Start Time:	24/8/20 2:42:55 PM
	Temperature: 25.1 °C
<>	1	2	3	4	5	6	7	8	9	10	11	12
A	0.5513	0.5346	0.7037	0.7096	0.2017	0.2002	0.2351	0.2867	0.0469	0.0471	0.0477	0.0475
B	0.5256	0.5191	0.735	0.7351	0.1804	0.1788	0.2769	0.2791	0.047	0.0475	0.047	0.0468
C	0.5115	0.5132	0.7331	0.7194	0.1623	0.1603	0.2673	0.273	0.047	0.0466	0.0464	0.0463
D	0.5298	0.5097	0.7309	0.7316	0.1802	0.1807	0.281	0.2827	0.0468	0.0464	0.0461	0.0461
E	0.527	0.5149	0.7028	0.702	0.186	0.1858	0.2763	0.2779	0.0464	0.0461	0.0459	0.0458
F	0.5353	0.5231	0.7324	0.735	0.204	0.2042	0.2934	0.2948	0.0468	0.0465	0.046	0.0463
G	0.0461	0.0458	0.0471	0.0472	0.0476	0.046	0.0465	0.0472	0.0471	0.0458	0.0459	0.0468
H	0.0476	0.0464	0.0461	0.0465	0.0463	0.0459	0.0459	0.0467	0.0459	0.0473	0.0468	0.0468
End Time:	24/8/20 2:44:12 PM
				Dilution	Hours	Abs		Corrected by dilution		AVG	GLU content
A1	DMEM	100	AP	25	2	0.5513	0.5346	13.7825	13.365	13.5738	283.472
C1+D1	GL_t0	100	AP	25	2	0.5256	0.5191	13.14	12.9775	13.0588	272.698
A2+B2	GL_t48	100	AP	25	2	0.5115	0.5132	12.7875	12.83	12.8087	267.468
C2+D2	GL_t72	100	AP	25	2	0.5298	0.5097	13.245	12.7425	12.9937	271.338
A3+B3	CH_t0	100	AP	25	2	0.527	0.5149	13.175	12.8725	13.0238	271.965
C3+D3	CH_t3	100	AP	25	2	0.5353	0.5231	13.3825	13.0775	13.23	276.28
A4+B4	DMEM	100	AP	5	24	0.2017	0.2002	1.0085	1.001	1.00475	20.522
C4+D4	GL_t0	100	AP	5	24	0.1804	0.1788	0.902	0.894	0.898	18.2887
A5+B5	GL_t48	100	AP	5	24	0.1623	0.1603	0.8115	0.8015	0.8065	16.3745
C5+D5	GL_t72	100	AP	5	24	0.1802	0.1807	0.901	0.9035	0.90225	18.3776
A6+B6	CH_t0	100	AP	5	24	0.186	0.1858	0.93	0.929	0.9295	18.9477
C6+D6	CH_t3	100	AP	5	24	0.204	0.2042	1.02	1.021	1.0205	20.8515
A1	DMEM	100	BL	25	2	0.7037	0.7096			0.70665	14.2856
C1+D1	GL_t0	100	BL	25	2	0.735	0.7351			0.73505	14.8797
A2+B2	GL_t48	100	BL	25	2	0.7331	0.7194			0.72625	14.6956
C2+D2	GL_t72	100	BL	25	2	0.7309	0.7316			0.73125	14.8002
A3+B3	CH_t0	100	BL	25	2	0.7028	0.702			0.7024	14.1967
C3+D3	CH_t3	100	BL	25	2	0.7324	0.735			0.7337	14.8515
A4+B4	DMEM	100	BL	5	24	0.2351	0.2867	1.1755	1.4335	1.3045	26.7929
C4+D4	GL_t0	100	BL	5	24	0.2769	0.2791	1.3845	1.3955	1.39	28.5816
A5+B5	GL_t48	100	BL	5	24	0.2673	0.273	1.3365	1.365	1.35075	27.7605
C5+D5	GL_t72	100	BL	5	24	0.281	0.2827	1.405	1.4135	1.40925	28.9843
A6+B6	CH_t0	100	BL	5	24	0.2763	0.2779	1.3815	1.3895	1.3855	28.4874
C6+D6	CH_t3	100	BL	5	24	0.2934	0.2948	1.467	1.474	1.4705	30.2657

## Sheet: Plate H (100)
Application: Tecan i-control				Tecan i-control , 1.11.1.0
Device: infinite 200Pro				Serial number: 1110007777				Serial number of connected stacker:
Firmware: V_3.37_07/12_Infinite (Jul 20 2012/13.56.47)				MAI, V_3.37_07/12_Infinite (Jul 20 2012/13.56.47)
Date:	24/8/20
Time:	12:59:16 PM
System				D0149128
User				WUR\dist002
Plate				Greiner 96 Flat Bottom Transparent Polystyrene Cat. No.: 655101/655161/655192 [GRE96ft.pdfx]
Plate-ID (Stacker)
Label: Label1
Mode				Absorbance
Wavelength				510	nm
Bandwidth				9	nm
Number of Flashes				25
Settle Time				0	ms
Start Time:	24/8/20 12:59:16 PM
	Temperature: 24.1 °C
<>	1	2	3	4	5	6	7	8	9	10	11	12
A	0.0464	0.047	0.0456	0.0458	0.0458	0.0472	0.5291	0.5288	0.055	0.0558	0.7258	0.7424
B	0.0457	0.0459	0.0458	0.0454	0.0457	0.0458	0.5246	0.5224	0.0556	0.0552	0.7084	0.7395
C	0.0464	0.0456	0.0468	0.0454	0.0453	0.0462	0.5133	0.5053	0.0636	0.0634	0.1629	0.1656
D	0.0453	0.0454	0.0452	0.0451	0.0451	0.0471	0.5075	0.5074	0.0488	0.0491	0.1602	0.1608
E	0.0457	0.0479	0.0451	0.0449	0.0452	0.0458	0.5195	0.515	0.7079	0.7085	0.1813	0.1815
F	0.0475	0.0472	0.045	0.0451	0.0449	0.0452	0.5017	0.4978	0.7595	0.765	0.178	0.1767
G	0.0468	0.0456	0.0454	0.0449	0.0453	0.0455	0.0486	0.0464	0.7485	0.7434	0.1971	0.1955
H	0.0451	0.045	0.0449	0.0461	0.045	0.0451	0.0474	0.0493	0.7454	0.7535	0.1518	0.1561
Plate H (24.2)
End Time:	24/8/20 1:00:32 PM
		Conc (mg/mL)		Hours	Dilution	Abs		Corrected by dilution		AVG	GLU content
A1+B1	DMEM	500	AP	2	25	0.5291	0.5288	13.2275	13.22	13.2238	276.15
C1+D1	GL_t0	500	AP	2	25	0.5246	0.5224	13.115	13.06	13.0875	273.299
A2+B2	GL_t48	500	AP	2	25	0.5133	0.5053	12.8325	12.6325	12.7325	265.872
C2+D2	GL_t72	500	AP	2	25	0.5075	0.5074	12.6875	12.685	12.6862	264.905
A3+B3	CH_t0	500	AP	2	25	0.5195	0.515	12.9875	12.875	12.9313	270.03
C3	CH_t3	500	AP	2	25	0.5017	0.4978	12.5425	12.445	12.4937	260.878
A4+B4	DMEM	500	AP	24	5	0.0486	0.0464	0.243	0.232	0.2375	4.47071
C4+D4	GL_t0	500	AP	24	5	0.0474	0.0493	0.237	0.2465	0.24175	4.55962
A5+B5	GL_t48	500	AP	24	5	0.055	0.0558	0.275	0.279	0.277	5.29707
C5+D5	GL_t72	500	AP	24	5	0.0556	0.0552	0.278	0.276	0.277	5.29707
A6+B6	CH_t0	500	AP	24	5	0.0636	0.0634	0.318	0.317	0.3175	6.14435
C6+D6	CH_t3	500	AP	24	5	0.0488	0.0491	0.244	0.2455	0.24475	4.62238
A1+B1	DMEM	500	BL	2		0.7079	0.7085			0.7082	14.318
C1+D1	GL_t0	500	BL	2		0.7595	0.765			0.76225	15.4487
A2+B2	GL_t48	500	BL	2		0.7485	0.7434			0.74595	15.1077
C2+D2	GL_t72	500	BL	2		0.7454	0.7535			0.74945	15.181
A3+B3	CH_t0	500	BL	2		0.7258	0.7424			0.7341	14.8598
C3	CH_t3	500	BL	2		0.7084	0.7395			0.72395	14.6475
A4+B4	DMEM	500	BL	24	5	0.1629	0.1656	0.8145	0.828	0.82125	16.6831
C4+D4	GL_t0	500	BL	24	5	0.1602	0.1608	0.801	0.804	0.8025	16.2908
A5+B5	GL_t48	500	BL	24	5	0.1813	0.1815	0.9065	0.9075	0.907	18.477
C5+D5	GL_t72	500	BL	24	5	0.178	0.1767	0.89	0.8835	0.88675	18.0533
A6+B6	CH_t0	500	BL	24	5	0.1971	0.1955	0.9855	0.9775	0.9815	20.0356
C6+D6	CH_t3	500	BL	24	5	0.1518	0.1561	0.759	0.7805	0.76975	15.6056

## Sheet: Plate O + P (std)
Application: Tecan i-control				Tecan i-control , 1.11.1.0
Device: infinite 200Pro				Serial number: 1110007777				Serial number of connected stacker:
Firmware: V_3.37_07/12_Infinite (Jul 20 2012/13.56.47)				MAI, V_3.37_07/12_Infinite (Jul 20 2012/13.56.47)
Date:	29/9/20
Time:	7:42:03 PM
System				D0149128
User				WUR\dist002
Plate				Greiner 96 Flat Bottom Transparent Polystyrene Cat. No.: 655101/655161/655192 [GRE96ft.pdfx]
Plate-ID (Stacker)
Label: Label1
Mode				Absorbance
Wavelength				510	nm
Bandwidth				9	nm
Number of Flashes				25
Settle Time				0	ms
Start Time:	29/9/20 7:42:03 PM
	Temperature: 23.8 °C
<>	1	2	3	4	5	6	7	8	9	10	11	12		Plate P (B1, B4)
A	0.049	0.0557	0.5318	0.5219	0.5279	0.5167	0.3295	0.33	1.6463	1.6608	0.0518	0.0497		0.507	0.5121
B	0.0477	0.0457	0.5235	0.5108	0.5848	0.585	0.268	0.2721	1.5077	1.5684	0.0472	0.0475		0.6344	0.5084
C	0.0478	0.0457	0.4995	0.5041	0.5199	0.527	0.3266	0.3234	1.6455	1.6415	0.0459	0.047		0.2561	0.2521
D	0.0473	0.0491	0.5089	0.5152	0.5459	0.5444	0.3638	0.378	1.8488	1.7674	0.0495	0.0475		1.4753	1.4693
E	0.0483	0.0463	0.5121	0.5104	0.5911	0.5938	0.2674	0.2683	1.1122	1.3678	0.046	0.0463
F	0.0503	0.0497	0.0524	0.0498	0.0522	0.0542	0.0545	0.054	0.0523	0.0576	0.0596	0.0631
G	0.0518	0.0471	0.4812	0.4813	0.5659	0.5824	0.3351	0.3343	1.6087	1.6901	0.0486	0.047
H	0.0602	0.0462	0.4883	0.4891	0.5967	0.6035	0.3334	0.3323	1.6327	1.6034	0.0466	0.0467
PLATE 29.09.4: Plate O + P standards
End Time:	29/9/20 7:43:20 PM
	Plate O			Abs		Dilution	Corrected by dilution		AVG	GLU content
A1	sitagliptin	AP	2	0.5318	0.5219	25	13.295	13.0475	13.1712	275.051
B1	sitagliptin	AP	2	0.5235	0.5108	25	13.0875	12.77	12.9288	269.978
C1	phloretin	AP	2	0.4995	0.5041	25	12.4875	12.6025	12.545	261.95
D1	phloretin	AP	2	0.5089	0.5152	25	12.7225	12.88	12.8013	267.311
A6	sitagliptin	AP	24	0.3295	0.33	5	1.6475	1.65	1.64875	33.9948
B6	sitagliptin	AP	24	0.268	0.2721	5	1.34	1.3605	1.35025	27.75
C6	phloretin	AP	24	0.3266	0.3234	5	1.633	1.617	1.625	33.4979
D6	phloretin	AP	24	0.3638	0.378	5	1.819	1.89	1.8545	38.2992
A1	sitagliptin	BL	2	0.5279	0.5167				0.5223	10.4289
B1	sitagliptin	BL	2	0.5848	0.585				0.5849	11.7385
C1	phloretin	BL	2	0.5199	0.527				0.52345	10.4529
D1	phloretin	BL	2	0.5459	0.5444				0.54515	10.9069
A6	sitagliptin	BL	24	1.6463	1.6608	5	8.2315	8.304	8.26775	172.468
B6	sitagliptin	BL	24	1.5077	1.5684	5	7.5385	7.842	7.69025	160.386
C6	phloretin	BL	24	1.6455	1.6415	5	8.2275	8.2075	8.2175	171.416
D6	phloretin	BL	24	1.8488	1.7674	5	9.244	8.837	9.0405	188.634
	Plate P
A1	sitagliptin	AP	2	0.5121	0.5104	25	12.8025	12.76	12.7812	266.892
B1	sitagliptin	AP	2	0.507	0.5121	25	12.675	12.8025	12.7388	266.003
C1	phloretin	AP	2	0.4812	0.4813	25	12.03	12.0325	12.0313	251.202
D1	phloretin	AP	2	0.4883	0.4891	25	12.2075	12.2275	12.2175	255.098
A6	sitagliptin	AP	24	0.2674	0.2683	5	1.337	1.3415	1.33925	27.5199
B6	sitagliptin	AP	24	0.2561	0.2521	5	1.2805	1.2605	1.2705	26.0816
C6	phloretin	AP	24	0.3351	0.3343	5	1.6755	1.6715	1.6735	34.5126
D6	phloretin	AP	24	0.3334	0.3323	5	1.667	1.6615	1.66425	34.319
A1	sitagliptin	BL	2	0.5911	0.5938				0.59245	11.8964
B1	sitagliptin	BL	2	0.6344	0.5084				0.5714	11.4561
C1	phloretin	BL	2	0.5659	0.5824				0.57415	11.5136
D1	phloretin	BL	2	0.5967	0.6035				0.6001	12.0565
A6	sitagliptin	BL	24	1.1122	1.3678	5	5.561	6.839	6.2	129.209
B6	sitagliptin	BL	24	1.4753	1.4693	5	7.3765	7.3465	7.3615	153.508
C6	phloretin	BL	24	1.6087	1.6901	5	8.0435	8.4505	8.247	172.033
D6	phloretin	BL	24	1.6327	1.6034	5	8.1635	8.017	8.09025	168.754

## Sheet: Plate N
Application: Tecan i-control				Tecan i-control , 1.11.1.0
Device: infinite 200Pro				Serial number: 1110007777				Serial number of connected stacker:
Firmware: V_3.37_07/12_Infinite (Jul 20 2012/13.56.47)				MAI, V_3.37_07/12_Infinite (Jul 20 2012/13.56.47)
Date:	29/9/20
Time:	6:48:17 PM
System				D0149128
User				WUR\dist002
Plate				Greiner 96 Flat Bottom Transparent Polystyrene Cat. No.: 655101/655161/655192 [GRE96ft.pdfx]
Plate-ID (Stacker)
Label: Label1
Mode				Absorbance
Wavelength				510	nm
Bandwidth				9	nm
Number of Flashes				25
Settle Time				0	ms
Start Time:	29/9/20 6:48:17 PM
	Temperature: 23.3 °C
<>	1	2	3	4	5	6	7	8	9	10	11	12
A	0.0464	0.0473	0.5492	0.5451	0.6828	0.6727	0.2082	0.2092	0.3032	0.3027	0.0469	0.0464
B	0.0461	0.0462	0.5492	0.5504	0.6054	0.6056	0.2672	0.2635	0.3339	0.3375	0.0462	0.0463
C	0.0461	0.0459	0.548	0.5461	0.5969	0.6096	0.244	0.2601	0.3187	0.3239	0.0461	0.047
D	0.0459	0.0457	0.5409	0.5408	0.6563	0.6503	0.2621	0.2641	0.3263	0.3302	0.0467	0.0462
E	0.0461	0.0462	0.5128	0.5177	0.5774	0.5609	0.268	0.2662	0.3104	0.3111	0.0467	0.0463
F	0.049	0.0477	0.512	0.5031	0.6272	0.6197	0.2358	0.2313	0.3065	0.3115	0.0465	0.0465
G	0.0474	0.047	0.046	0.046	0.0456	0.046	0.0459	0.0459	0.0472	0.046	0.0461	0.0456
H	0.0468	0.0468	0.0477	0.0465	0.0556	0.0457	0.0456	0.0456	0.0457	0.0459	0.0474	0.0461
29.09.2: Plate N, GLU content
End Time:	29/9/20 6:49:34 PM
		Conc (mg/mL)		Hours	Dilution	Abs		Corrected by dilution		AVG	GLU content
A1+B1	DMEM	100	AP	2	25	0.5492	0.5451	13.73	13.6275	13.6787	285.668
C1+D1	GL_t0	100	AP	2	25	0.5492	0.5504	13.73	13.76	13.745	287.054
A2+B2	GL_t48	100	AP	2	25	0.548	0.5461	13.7	13.6525	13.6762	285.616
C2+D2	GL_t72	100	AP	2	25	0.5409	0.5408	13.5225	13.52	13.5212	282.373
A3+B3	CH_t0	100	AP	2	25	0.5128	0.5177	12.82	12.9425	12.8812	268.984
C3+D3	CH_t3	100	AP	2	25	0.512	0.5031	12.8	12.5775	12.6888	264.957
A4+B4	DMEM	100	AP	24	5	0.2082	0.2092	1.041	1.046	1.0435	21.3326
C4+D4	GL_t0	100	AP	24	5	0.2672	0.2635	1.336	1.3175	1.32675	27.2584
A5+B5	GL_t48	100	AP	24	5	0.244	0.2601	1.22	1.3005	1.26025	25.8672
C5+D5	GL_t72	100	AP	24	5	0.2621	0.2641	1.3105	1.3205	1.3155	27.023
A6+B6	CH_t0	100	AP	24	5	0.268	0.2662	1.34	1.331	1.3355	27.4414
C6+D6	CH_t3	100	AP	24	5	0.2358	0.2313	1.179	1.1565	1.16775	23.932
A1+B1	DMEM	100	BL	2		0.6828	0.6727			0.67775	13.681
C1+D1	GL_t0	100	BL	2		0.6054	0.6056			0.6055	12.1695
A2+B2	GL_t48	100	BL	2		0.5969	0.6096			0.60325	12.1224
C2+D2	GL_t72	100	BL	2		0.6563	0.6503			0.6533	13.1695
A3+B3	CH_t0	100	BL	2		0.5774	0.5609			0.56915	11.409
C3+D3	CH_t3	100	BL	2		0.6272	0.6197			0.62345	12.545
A4+B4	DMEM	100	BL	24	5	0.3032	0.3027	1.516	1.5135	1.51475	31.1914
C4+D4	GL_t0	100	BL	24	5	0.3339	0.3375	1.6695	1.6875	1.6785	34.6172
A5+B5	GL_t48	100	BL	24	5	0.3187	0.3239	1.5935	1.6195	1.6065	33.1109
C5+D5	GL_t72	100	BL	24	5	0.3263	0.3302	1.6315	1.651	1.64125	33.8379
A6+B6	CH_t0	100	BL	24	5	0.3104	0.3111	1.552	1.5555	1.55375	32.0073
C6+D6	CH_t3	100	BL	24	5	0.3065	0.3115	1.5325	1.5575	1.545	31.8243

## Sheet: Plate O (+ std plate P)
Application: Tecan i-control				Tecan i-control , 1.11.1.0
Device: infinite 200Pro				Serial number: 1110007777				Serial number of connected stacker:
Firmware: V_3.37_07/12_Infinite (Jul 20 2012/13.56.47)				MAI, V_3.37_07/12_Infinite (Jul 20 2012/13.56.47)
Date:	29/9/20
Time:	8:27:27 PM
System				D0149128
User				WUR\dist002
Plate				Greiner 96 Flat Bottom Transparent Polystyrene Cat. No.: 655101/655161/655192 [GRE96ft.pdfx]
Plate-ID (Stacker)
Label: Label1
Mode				Absorbance
Wavelength				510	nm
Bandwidth				9	nm
Number of Flashes				25
Settle Time				0	ms
Start Time:	29/9/20 8:27:27 PM
	Temperature: 23.7 °C
<>	1	2	3	4	5	6	7	8	9	10	11	12
A	0.507	0.5121	0.5355	0.5318	0.5262	0.5186	0.332	0.3332	0.3623	0.3524	0.0475	0.0468
B	0.6344	0.5084	0.5173	0.5108	0.5873	0.4858	0.3546	0.3489	0.3742	0.3818	0.0466	0.0467
C	0.2561	0.2521	0.5287	0.5289	0.5515	0.5577	0.2728	0.2737	0.3136	0.3154	0.0458	0.0457
D	1.4753	1.4693	0.5227	0.5537	0.5811	0.5657	0.2973	0.2967	0.3286	0.3304	0.0457	0.0456
E	0.0453	0.0453	0.5227	0.5181	0.5477	0.5509	0.2761	0.2764	0.309	0.3103	0.0454	0.0461
F	0.0451	0.0456	0.5391	0.5522	0.6684	0.6692	0.0341	0.0353	0.035	0.035	0.0453	0.0455
G	0.0453	0.0459	0.0466	0.0453	0.0447	0.0455	0.0452	0.0447	0.0455	0.0453	0.046	0.0448
H	0.0455	0.0482	0.0447	0.0449	0.0475	0.0467	0.0454	0.0445	0.0473	0.0458	0.0467	0.0463
29.09.3: Glu content Plate O + STD plate P
End Time:	29/9/20 8:28:44 PM
