# Supplementary material for: Solid-state fermentation of green lentils by Lactiplantibacillus plantarum leads to formation of distinct peptides that are absorbable and enhances DPP-IV inhibitory activity in an intestinal Caco-2 cell model
Source: Royal Society of Chemistry journal article supplement (doi:10.1039/d4fo03326d), 2024-01-01
Supplement: d4fo03326d2.xlsx [file d4fo03326d2.xlsx]

## Sheet: 100 mg.mL
In situ DPP-IV Activity
100 mg/mL
						x= (y+0.0025)/0.0002
	Sample	Incubation Time (h)	Net Values			DPP-IV Activity								Prot content (25X)	DPP-IV Activity (Adj. to prot content)			AVG	STD	↓	% ↓ (compared to untreated)
Plate N	DMEM	2	0.203267	0.217967	0.196067	1028.83	1102.33	992.833						1.0212	1007.47	1079.44	972.218	1019.71	44.6225					Grouped
	GL_T0	2	0.316033	0.342633	0.277033	1592.67	1725.67	1397.67						1.25869	1265.33	1371	1110.41	1248.91	107.016	-229.203	-22.4773			2 hours
	GL_T48	2	0.204233	0.197233	0.193833	1033.67	998.667	981.667						1.14334	904.075	873.463	858.594	878.711	18.9346	141	13.8275				Plate N	Plate O	Plate H	P36	P38
	GL_T72	2	0.2199	0.1971	0.2091	1112	998	1058						1.49618	743.224	667.031	707.133	705.796	31.1204	313.915	30.7847			GL_T0	0	0.938605	12.9235	0	0
	DMEM	24	0.261933	0.292433	0.283933	1322.17	1474.67	1432.17						1.03138	1281.94	1429.8	1388.59	1366.77	62.3034					GL_T48	13.8275	36.1628	22.8207	40.5726	25.9794
	GL_T0	24	0.3342	0.2873	0.3009	1683.5	1449	1517						1.35369	1243.64	1070.41	1120.64	1144.9	72.7708	221.878	16.2337			GL_T72	30.7847	20.2981	19.3395	51.2698	25.0971
	GL_T48	24	0.159867	0.173767	0.181167	811.833	881.333	918.333						1.05852	766.948	832.606	867.56	822.371	41.7072	544.402	39.8312
	GL_T72	24	0.227233	0.226033	0.226633	1148.67	1142.67	1145.67						0.966921	1187.96	1181.76	1184.86	1184.86	2.53327	181.913	13.3097
																		1559
Plate O	GL_T0	2	0.315067	0.322367	0.310767	1587.83	1624.33	1566.33						1.03138	1539.52	1574.91	1518.67	1544.37	23.2124	14.6329	0.938605			24 hours
	GL_T48	2	0.166633	0.167333	0.167033	845.667	849.167	847.667						0.851569	993.069	997.179	995.417	995.222	1.68365	563.778	36.1628				Plate N	Plate O	Plate H	P36	P38
	GL_T72	2	0.2402	0.2375	0.2382	1213.5	1200	1203.5						0.970314	1250.63	1236.71	1240.32	1242.55	5.89535	316.447	20.2981			GL_T0	16.2337	0	21.3291	1.23963	0
	GL_T0	24	0.247967	0.261067	0.241467	1252.33	1317.83	1219.83						0.442183	2832.16	2980.29	2758.66	2857.04	92.1733	-1298.04	-83.261			GL_T48	39.8312	35.8033	32.6452	17.1587	12.0414
	GL_T48	24	0.1998	0.1974	0.1924	1011.5	999.5	974.5						0.994345	1017.25	1005.18	980.042	1000.83	15.5005	558.174	35.8033			GL_T72	13.3097	27.3288	33.7428	48.7596	24.6644
	GL_T72	24	0.267867	0.292767	0.273167	1351.83	1476.33	1378.33						1.23763	1092.28	1192.87	1113.69	1132.94	43.2665	426.056	27.3288
Plate H	DMEM	2	0.468333	0.448833	0.411633	2354.17	2256.67	2070.67						1.42776	1648.85	1580.56	1450.29	1559.9	82.3688
	GL_T0	2	0.429667	0.365367	0.408767	2160.83	1839.33	2056.33						1.48629	1453.85	1237.54	1383.54	1358.31	90.0926	201.593	12.9235
	GL_T48	2	0.376167	0.379567	0.372167	1893.33	1910.33	1873.33						1.57181	1204.55	1215.37	1191.83	1203.92	9.62058	355.981	22.8207
	GL_T72	2	0.3606	0.3264	0.3442	1815.5	1644.5	1733.5						1.37588	1319.52	1195.23	1259.92	1258.22	50.7528	301.677	19.3395
	DMEM	24	0.3863	0.3609	0.3675	1944	1817	1850						1.189	1634.98	1528.17	1555.93	1573.03	45.2515
	GL_T0	24	0.373633	0.347233	0.369233	1880.67	1748.67	1858.67						1.47823	1272.24	1182.95	1257.36	1237.52	39.0621	335.512	21.3291
	GL_T48	24	0.2805	0.2872	0.2778	1415	1448.5	1401.5						1.34182	1054.54	1079.51	1044.48	1059.51	14.725	513.518	32.6452
	GL_T72	24	0.288067	0.315367	0.260167	1452.83	1589.33	1313.33						1.39299	1042.96	1140.95	942.817	1042.24	80.8899	530.784	33.7428
P36	Caco-2 control	2	1.25075	1.24005	1.26045	6266.25	6212.75	6314.75						0.138633	45200.2	44814.3	45550	45188.1	300.489
Diluted (25X)	cell control	2	0.121567	0.101067	0.0935667	620.333	517.833	480.333						0.188295	3294.47	2750.11	2550.96	2865.18	314.254
	GL_T0	2	0.156067	0.170467	0.155167	792.833	864.833	788.333						0.26138	3033.26	3308.72	3016.05	3119.34	134.096	-254.162	-8.87071
	GL_T48	2	0.145733	0.154633	0.139833	741.167	785.667	711.667						0.438224	1691.29	1792.84	1623.98	1702.7	69.4086	1162.48	40.5726
	GL_T72	2	0.1403	0.1367	0.1706	714	696	865.5						0.543257	1314.3	1281.16	1593.17	1396.21	139.927	1468.97	51.2698
Diluted (25X)	cell control	24	0.132467	0.137567	0.133867	674.833	700.333	681.833						0.340826	1980	2054.81	2000.53	2011.78	31.5629
	GL_T0	24	0.1545	0.1495	0.1559	785	760	792						0.268731	2921.14	2828.11	2947.19	2898.81	51.1128	1986.84	24.9387	1.23963
	GL_T0	24	0.0824333	0.0821333	0.0839333	424.667	423.167	432.167						0.396947	1069.83	1066.05	1088.73	1074.87	9.91816
	GL_T48	24	0.1468	0.1468	0.1506	746.5	746.5	765.5						0.316228	2360.64	2360.64	2420.72	2380.66	28.3235	1666.59	345.195	17.1587
	GL_T48	24	0.137667	0.122167	0.143967	700.833	623.333	732.333						0.719678	973.816	866.129	1017.59	952.51	63.6408
	GL_T72	24	0.0688	0.0596	0.0586	356.5	310.5	305.5						0.350862	1016.07	884.963	870.712	923.914	65.4218	1030.84	980.938	48.7596
	GL_T72	24	0.142067	0.125167	0.144767	722.833	638.333	736.333						0.614504	1176.29	1038.78	1198.26	1137.77	70.5728
P38	cell control	2	0.9307	0.9048	0.9005	4666	4536.5	4515						0.0671	69538	67608	67287.6	68144.6	993.957
	GL_T0_100	2	1.01027	1.03347	1.02477	5063.83	5179.83	5136.33						0.0623	81281.4	83143.4	82445.2	82290	768.016	-14145.4	-20.758
	GL_T48_100	2	1.0738	1.0325	0.9399	5381.5	5175	4712						0.1009	53335	51288.4	46699.7	50441	2774.32	17703.5	25.9794
	GL_T72_100	2	0.7303	0.7195	0.7171	3664	3610	3598						0.071	51605.6	50845.1	50676.1	51042.3	404.301	17102.3	25.0971
	cell control	24	1.19903	1.14033	1.10583	6007.67	5714.17	5541.67						0.0849333	70733.9	67278.3	65247.3	67753.1	2264.95
	GL_T0_100	24	1.08117	1.06437	1.12377	5418.33	5334.33	5631.33						0.0778333	69614.6	68535.3	72351.2	70167	1606.05	-2413.88	-35.6276
	GL_T48_100	24	0.816333	0.828533	0.845733	4094.17	4155.17	4241.17						0.0622	65822.6	66803.3	68186	66937.3	969.471	815.841	12.0414
	GL_T72_100	24	0.7303	0.7195	0.7171	3664	3610	3598						0.071	51605.6	50845.1	50676.1	51042.3	404.301	16710.9	24.6644

## Sheet: 200 mgmL
In situ DPP-IV Activity
200 mg/mL
						x= (y+0.0025)/0.0002
	Sample	Incubation Time (h)	Net Values			DPP-IV Activity									Prot content (25X)	DPP-IV Activity (Adj. to prot content)			AVG	STD	↓	% ↓ (compared to untreated)
P 36	DMEM	2	0.0537333	0.0512333	0.0503333	281.167	268.667	264.167							0.1	2811.67	2686.67	2641.67	2713.33	71.9183
	Fluids_200		0.0891	0.0805	0.0996	458	415	510.5							0.203887	2246.34	2035.44	2503.83	2261.87	191.537	451.465	16.6387
	GL_T0	2	0.0664667	0.0649667	0.0651667	344.833	337.333	338.333							0.16212	2127.02	2080.76	2086.93	2098.23	20.5094	615.099	22.6695			Grouped
	GL_T48	2	0.0812333	0.0824333	0.0808333	418.667	424.667	416.667							0.246183	1700.63	1725	1692.51	1706.05	13.8082	1007.29	37.1236			2 hours
	GL_T72	2	0.0745333	0.0661333	0.0659333	385.167	343.167	342.167							0.234803	1640.38	1461.51	1457.25	1519.71	85.3431	1193.62	43.991				P 36	P38	P40
	DMEM	24	0.0649333	0.0676333	0.0677333	337.167	350.667	351.167							0.155652	2166.16	2252.89	2256.11	2225.05	41.6637					GL_T0	22.6695	5.1108	6.07106
	Fluids_200		0.0888333	0.0834333	0.0835333	456.667	429.667	430.167							0.222856	2049.16	1928.01	1930.25	1969.14	56.5914	255.915	11.5015
	GL_T0	24	0.133567	0.135267	0.133967	680.333	688.833	682.333							0.352479	1930.14	1954.25	1935.81	1940.07	10.2945	284.988	12.8081			GL_T48	37.1236	23.9436	47.2479
	GL_T48	24	0.0523333	0.0515333	0.0591333	274.167	270.167	308.167							0.23272	1178.1	1160.91	1324.2	1221.07	73.2595	1003.99	45.1219			GL_T72	43.991	22.9096	44.8918
	GL_T72	24	0.0874	0.0876	0.0871	449.5	450.5	448							0.350093	1283.94	1286.8	1279.66	1283.47	2.93468	941.586	42.3175				16.6387	14.4802	5.04916
																									Grouped
																									24 hours
																										P 36	P38	P40
																									GL_T0	12.8081	28.8974	25.1307
																									GL_T48	45.1219	28.6464	37.6363
																									GL_T72	42.3175	41.0423	47.5486
																									fluids	11.5015	22.1907
P 38	DMEM	2	0.9307	0.9048	0.9005	4666	4536.5	4515							0.0671	69538	67608	67287.6	68144.6	993.957
	Fluids_200		0.704433	0.707933	0.684333	3534.67	3552.17	3434.17							0.060178	58736.8	59027.6	57066.8	58277.1	864.006	9867.49	14.4802
	GL_T0	2	0.90001	0.9008	0.9049	4512.55	4516.5	4537							0.0699333	64526.5	64582.9	64876.1	64661.8	153.248	3482.73	5.1108
	GL_T48	2	0.726733	0.730133	0.726933	3646.17	3663.17	3647.17							0.0704667	51743.1	51984.4	51757.3	51828.3	110.532	16316.3	23.9436
	GL_T72	2	0.732733	0.756933	0.736533	3676.17	3797.17	3695.17							0.0708667	51874.4	53581.8	52142.5	52532.9	749.73	15611.6	22.9096
	DMEM	24	1.19903	1.14033	1.10583	6007.67	5714.17	5541.67							0.0749333	80173.5	76256.7	73954.6	76794.9	2567.21
	Fluids_200		0.4858	0.514	0.4669	2441.5	2582.5	2347							0.142494	17134.1	18123.6	16470.9	17242.9	679.084	59552.1	22.1907
	GL_T0	24	0.729633	0.730433	0.734033	3660.67	3664.67	3682.67							0.0672	54474.2	54533.7	54801.6	54603.2	142.388	22191.8	28.8974
	GL_T48	24	0.7868	0.7664	0.8021	3946.5	3844.5	4023							0.0718667	54914.2	53494.9	55978.7	54795.9	1017.44	21999	28.6464
	GL_T72	24	0.615033	0.673833	0.701233	3087.67	3381.67	3518.67							0.0735333	41990	45988.2	47851.3	45276.5	2445.21	31518.4	41.0423
Plate 40	DMEM	2	1.2634	1.2604	1.2848	6329.5	6314.5	6436.5							0.0750333	84355.8	84155.9	85781.9	84764.5	723.972
	Fluids_200		1.2437	1.2182	1.2007	6231	6103.5	6016							0.076	81986.8	80309.2	79157.9	80484.6	1161.56	4279.9	5.04916
	GL_T0	2	1.15153	1.14033	1.10193	5770.17	5714.17	5522.17							0.0712	81041.7	80255.1	77558.5	79618.4	1491.56	5146.11	6.07106
	GL_T48	2	0.631367	0.627867	0.616667	3169.33	3151.83	3095.83							0.0702	45147.2	44897.9	44100.2	44715.1	446.56	40049.4	47.2479
	GL_T72	2	0.675433	0.664733	0.668433	3389.67	3336.17	3354.67							0.0719333	47122.3	46378.6	46635.8	46712.2	308.408	38052.3	44.8918
	DMEM	24	0.376567	0.378567	0.373567	1895.33	1905.33	1880.33							0.268637	7055.36	7092.59	6999.53	7049.16	38.2449
	GL_T0	24	0.543833	0.548533	0.530933	2731.67	2755.17	2667.17							0.515001	5304.19	5349.82	5178.95	5277.66	72.2384	1771.5	25.1307
	GL_T48	24	0.543033	0.563133	0.581833	2727.67	2828.17	2921.67							0.642802	4243.4	4399.75	4545.21	4396.12	123.238	2653.04	37.6363
	GL_T72	24	0.5938	0.5695	0.59	2981.5	2860	2962.5							0.793715	3756.39	3603.31	3732.45	3697.38	67.2334	3351.78	47.5486

## Sheet: 500 mgmL
In situ DPP-IV Activity
500 mg/mL
						x= (y+0.0025)/0.0002
	Sample	Incubation Time (h)	Net Values			DPP-IV Activity									Prot content (25X)	DPP-IV Activity (Adj. to prot content)			AVG	STD	↓	% ↓ (compared to untreated)
Plate D	DMEM	2	0.5535	0.55	0.5291	2780	2762.5	2658							1.31849	2108.47	2095.2	2015.94	2073.2	40.8516
	GL_T0	2	0.405733	0.386433	0.395833	2041.17	1944.67	1991.67							1.36048	1500.33	1429.4	1463.95	1464.56	28.9607	608.643	29.3576
	GL_T48	2	0.4239	0.4084	0.4101	2132	2054.5	2063							1.30942	1628.21	1569.02	1575.51	1590.91	26.5037	482.291	23.2631
	GL_T72	2	0.4745	0.4553	0.4136	2385	2289	2080.5							1.3821	1725.63	1656.17	1505.31	1629.04	91.9673	444.166	21.4241			Grouped
	DMEM	24	0.469833	0.487933	0.542933	2361.67	2452.17	2727.17							1.20958	1952.46	2027.28	2254.63	2078.12	128.492					2 hours							23.1773
	GL_T0	24	0.257533	0.262733	0.246733	1300.17	1326.17	1246.17							0.907277	1433.04	1461.7	1373.52	1422.75	36.7253	655.369	31.5366				Plate D	Plate E	Plate I
	GL_T48	24	0.459433	0.420933	0.415233	2309.67	2117.17	2088.67							1.18066	1956.25	1793.2	1769.06	1839.51	83.1355	238.619	11.4824			GL_T0	29.3576	32.4699	13.8847
	GL_T72	24	0.377767	0.388367	0.338467	1901.33	1954.33	1704.83							1.11941	1698.51	1745.85	1522.97	1655.78	95.8777	422.348	20.3235			GL_T48	23.2631	23.2849	14.2569				#DIV/0!
Plate E	DMEM	2	0.5193	0.4994	0.5195	2609	2509.5	2610							1.50636	1731.99	1665.94	1732.65	1710.19	31.2954					GL_T72	21.4241	36.4771	23.4141
	GL_T0	2	0.418167	0.397767	0.435667	2103.33	2001.33	2190.83							1.81705	1157.56	1101.42	1205.71	1154.89	42.6177	555.297	32.4699
	GL_T48	2	0.472033	0.465333	0.494633	2372.67	2339.17	2485.67							1.82867	1297.48	1279.16	1359.28	1311.97	34.2736	398.217	23.2849
	GL_T72	2	0.385333	0.415933	0.429633	1939.17	2092.17	2160.67							1.89992	1020.66	1101.19	1137.24	1086.36	48.7361	623.828	36.4771
	DMEM	24	0.479633	0.468633	0.472633	2410.67	2355.67	2375.67							1.42494	1691.77	1653.17	1667.21	1670.72	15.9518					24 hours
	GL_T0	24	0.3036	0.2721	0.2742	1530.5	1373	1383.5							1.35369	1130.61	1014.26	1022.02	1055.63	53.1136	615.085	36.8156				Plate D	Plate E	Plate I
	GL_T48	24	0.402967	0.548567	0.459167	2027.33	2755.33	2308.33							2.1408	946.999	1287.06	1078.26	1104.11	140.027	566.612	33.9143			GL_T0	31.5366	36.8156	13.8876
	GL_T72	24	0.331433	0.257533	0.263333	1669.67	1300.17	1329.17							1.08567	1537.92	1197.58	1224.29	1319.93	154.529	350.791	20.9964			GL_T48	11.4824	33.9143	27.7236
Plate I	DMEM	2	0.279067	0.278767	0.263867	1407.83	1406.33	1331.83							0.888168	1585.1	1583.41	1499.53	1556.01	39.9457					GL_T72	20.3235	20.9964	12.8033
	GL_T0	2	0.284667	0.272867	0.278967	1435.83	1376.83	1407.33							1.04978	1367.75	1311.55	1340.6	1339.96	22.9489	216.048	13.8847
	GL_T48	2	0.280667	0.255167	0.280867	1415.83	1288.33	1416.83							1.0296	1375.13	1251.29	1376.1	1334.17	58.6063	221.839	14.2569
	GL_T72	2	0.252667	0.255667	0.255967	1275.83	1290.83	1292.33							1.07942	1181.96	1195.85	1197.24	1191.69	6.90168	364.326	23.4141
	DMEM	24	0.258967	0.297067	0.282367	1307.33	1497.83	1424.33							0.943707	1385.32	1587.18	1509.3	1493.93	83.1236
	GL_T0	24	0.247233	0.233233	0.244733	1248.67	1178.67	1236.17							0.949245	1315.43	1241.69	1302.26	1286.46	32.1121	207.471	13.8876
	GL_T48	24	0.2096	0.2189	0.219	1060.5	1107	1107.5							1.01103	1048.93	1094.93	1095.42	1079.76	21.7988	414.171	27.7236
	GL_T72	24	0.234733	0.227433	0.216433	1186.17	1149.67	1094.67							0.87782	1351.26	1309.68	1247.03	1302.66	42.8429	191.273	12.8033

## Sheet: STD curve DPP-IV (7.81-3000UmL)
Application: Tecan i-control				Tecan i-control , 1.11.1.0
Device: infinite 200Pro				Serial number: 1110007777				Serial number of connected stacker:
Firmware: V_3.37_07/12_Infinite (Jul 20 2012/13.56.47)				MAI, V_3.37_07/12_Infinite (Jul 20 2012/13.56.47)
Date:	27/5/20
Time:	2:31:00 PM
System				D0149128
User				WUR\dist002
Plate				Costar 96 U Bottom Transparent Polystyrene Cat. No.: 3359/3365 [COS96rt.pdfx]
Plate-ID (Stacker)
Label: Label1
Mode				Absorbance
Wavelength				405	nm
Bandwidth				9	nm
Number of Flashes				25
Settle Time				0	ms
Start Time:	27/5/20 2:31:01 PM
	Temperature: 25.4 °C
<>	1	2	3	4	5	6	7	8	9	10	11	12
A	0.5747	0.5887	0.585	0.2098	0.2128	0.2083	0.1114	0.1096	0.1072	0.0723	0.0748	0.0746
B	0.0602	0.0612	0.06	0.0561	0.0557	0.0553	0.0536	0.053	0.0557	0.0549	0.055	0.0552
C	0.0451	0.0437	0.0432	0.0433	0.0451	0.0432	0.0433	0.0471	0.0428	0.043	0.0431	0.043	*empty
D	0.0449	0.0435	0.0428	0.0422	0.0425	0.0439	0.0427	0.043	0.0434	0.0421	0.0424	0.0434
E	0.0459	0.0427	0.043	0.0438	0.0422	0.0433	0.055	0.0549	0.0544	0.0545	0.0546	0.0544
F	0.0536	0.0546	0.0535	0.0514	0.0559	0.053	0.0525	0.0543	0.0521	0.0546	0.0548	0.0557
G	0.0412	0.0431	0.0457	0.0416	0.0421	0.0422	0.0411	0.0412	0.0412	0.0545	0.0543	0.0543
H	0.0542	0.0552	0.0585	0.0566	0.0557	0.0545	0.0541	0.0543	0.0544	0.055	0.0544	0.055
End Time:	27/5/20 2:32:18 PM
	Abs			Blank			Avg Blank	Net value
3000	0.5747	0.5887	0.585	0.0449	0.0435	0.0428	0.0437333	0.530967	0.544967	0.541267	0.539067
1000	0.2098	0.2128	0.2083	0.0422	0.0425	0.0439	0.0428667	0.166933	0.169933	0.165433	0.167433
500	0.1114	0.1096	0.1072	0.0427	0.043	0.0434	0.0430333	0.0683667	0.0665667	0.0641667	0.0663667
250	0.0723	0.0748	0.0746	0.0421	0.0424	0.0434	0.0426333	0.0296667	0.0321667	0.0319667	0.0312667
125	0.0602	0.0612	0.06	0.0459	0.0427	0.043	0.0438667	0.0163333	0.0173333	0.0161333	0.0166
62.5	0.0561	0.0557	0.0553	0.0438	0.0422	0.0433	0.0431	0.013	0.0126	0.0122	0.0126
31.25	0.0536	0.0546	0.0535	0.0412	0.0431	0.0457	0.0433333	0.0102667	0.0112667	0.0101667	0.0105667
16	0.0514	0.0559	0.053	0.0416	0.0421	0.0422	0.0419667	0.00943333	0.0139333	0.0110333	0.0114667
7.81	0.0525	0.0543	0.0521	0.0411	0.0412	0.0412	0.0411667	0.0113333	0.0131333	0.0109333	0.0118
