# Supplementary material for: Solid-state fermentation of green lentils by Lactiplantibacillus plantarum leads to formation of distinct peptides that are absorbable and enhances DPP-IV inhibitory activity in an intestinal Caco-2 cell model
Source: Royal Society of Chemistry journal article supplement (doi:10.1039/d4fo03326d), 2024-01-01
Supplement: d4fo03326d3.xlsx [file d4fo03326d3.xlsx]

## Sheet: imputed_raw
	sequence	lfq_intensity_a4	lfq_intensity_a5	lfq_intensity_a6	lfq_intensity_b1	lfq_intensity_b2	lfq_intensity_b3	lfq_intensity_b4	lfq_intensity_b5	lfq_intensity_b6	lfq_intensity_g1	lfq_intensity_g2	lfq_intensity_g3	lfq_intensity_k1	lfq_intensity_k2	lfq_intensity_k3	lfq_intensity_p1	lfq_intensity_p2	lfq_intensity_p3
X1	ALGDTTNGCISTGPH	50425.4	43849.8	46820.9	44725	51521.8	46307.9	52621.2	52455.6	48361.5	76418.8	75808.1	67691.2	76419.1	73048.5	76329.1	266310	275890	76509
X2	DDVKSACCDTCLCTR	13644.6	13237.4	13607.5	13856.3	19590.4	14302.8	12049.4	18307.6	14902.9	68610	250000	67189	46368	19605.5	19648.2	19642	19452.5	19139.1
X3	DTHKFCYKACHNSE	192729	182492	182817	184028	149567	165284	199025	198369	194930	540710	199298	198643	199440	198835	199036	578640	670040	303970
X4	ESCHSACDKCVCAY	23286.6	20998.7	22304.3	23548.5	35906.3	20329.2	22175.1	28425	22933.5	42207	306600	39433.3	34575.1	35731.1	36696.5	32426.2	41937	34153.4
X5	GDDVKSACCDTCLCT	34292.4	19243.1	34823.4	19204.1	34590.1	35115.8	25265.9	30392.5	27246.8	35435	35351	1597000	851580	906560	647590	17386000	11037000	6659100
X6	GDDVKSACCDTCLCTR	704076	700706	670226	773604	781056	470778	599451	776116	703527	1677300	6500100	833910	1661300	1788800	782760	9011200	19898000	10439000
X7	AAVDTLPPVVNESEEPT	27236.1	28549	27776	30418.8	27723.3	28580.4	26247.4	31891.7	29323.6	63898	31894	41393	52501	31913	31829.2	38867	42567	57696
X8	AAVDTLPPVVNESEEPTAKP	13966.1	13110.9	15293.3	15174	15333.3	15262	22133	14218	13764	15384	43832	43423	56816	39386	27551	86421	85414	15365.4
X9	AFNTDYEEIE	215160	186680	118304	104667	118590	322450	118557	118670	347740	190580	118264	318880	226160	253600	209250	501650	436000	350880
X10	AFNTDYEEIEK	6269500	5762200	8654900	9.5463e+06	361260	10319000	8802800	9.6051e+06	9.1043e+06	14303.5	13163.8	7068300	5501500	5800000	3616700	14378	14093.8	13390.9
X11	AFNTDYEEIEKV	1073300	1043900	1275600	2899400	234210	2346400	3383600	6853.46	20892.3	2301800	23700	23698.1	1944300	912130	2070800	640080	814480	761160
X12	AFNTDYEEIEKVL	37202.3	35647.1	37742.7	37555	37750.1	37050.8	35014.2	68666	37909	91069	37778.7	75483	73987	74326	86125	71626	53868	90415
X13	AFNTDYEEIEKVLL	14130	12781.1	14229.8	13768.4	14303.3	14299.6	14340.6	14370	15600	91075	14263.2	104940	115750	131550	139230	88179	75345	82386
X14	AFNTDYEEIEKVLLEDQEQEPQ	32452.2	30283.9	30171.1	35065.4	36339.2	31899	32027.1	33187	31738.1	80854	36914.1	39457	66224	39943	108280	36918	45962	41818
X15	AFNTEYEEIE	42603.2	40935.9	45566.6	35185.9	41186.1	40047.4	46022	32597.2	43076.2	138330	45762.7	207410	45931.3	45564.5	45540.9	432950	423240	283140
X16	AFNTEYEEIEK	13812000	14614000	19586000	227850	1691500	21911000	19929000	20068000	15933000	13800000	2090000	8758000	6068800	6098500	5359400	10402000	33482.7	34941
X17	AFNTEYEEIEKV	2864100	2290900	2539900	5763800	338260	4745200	6065400	2201600	1912200	3254200	116180	2002000	2012500	1589900	2795400	823260	753290	1056100
X18	AFNTEYEEIEKVL	98805.5	89086.7	89933	98498.4	99660.3	97685.1	94282.9	198060	113460	233040	98678.3	141470	183110	186130	272020	102380	100040	129680
X19	AFNTEYEEIEKVLL	33347	28439.8	31231.6	31167.3	31293	31124.1	30841.8	31276.9	28041.9	215170	31258.7	253770	199960	169110	304750	135760	149260	141550
X20	AFNTEYEEIEKVLLEEQEQ	14108.9	12685.4	15073.2	13341.1	15550.1	15595.3	14943.2	12612.6	13377.5	17256.7	16843.4	55124	17258.6	44191	41828	16765.9	17230.2	17267
X21	AFNTEYEEIEKVLLEEQEQK	119810	99474.8	95354.7	113477	104421	110398	98028.8	105050	119534	281360	119856	301580	257250	218340	300460	119940	306360	203720
X22	AFNTEYEEIEKVLLEEQEQKS	19924.6	17151.8	14943.2	19787.2	17658.7	18155.7	14260.6	29969	19829.5	25302	19906	19931	52977	34849	19900.2	19928.3	40231	22910
X23	AFPGSAQEVDRLLENQ	23764.3	22816.8	25594.6	23138.3	27951.3	24036.6	27281.6	27928.9	26697.2	37314	27979.8	28003	32314	38107	42184	91740	58540	39865
X24	AFPGSAQEVDRLLENQK	6517.56	6578.12	8492.63	6779.15	7506.64	5914.73	7563.94	8660.69	7620.8	9701.86	9759	9740.82	9709.19	9736.43	9684.74	67598	59963	37172
X25	AFPGSAQEVDRLLENQKQS	25034.4	26364.6	32627.7	25122.7	37070.6	25602.3	30634.7	37593.2	31987.4	37193.9	37469.9	37924	37814.8	64098	38819.1	176530	81160	89160
X26	AGEEDNVISQIQRP	52532.5	49244.3	54562.7	55039.7	54574.5	1162500	296980	55252	151970	107000	721370	1339800	321800	447970	524530	54303.7	54592.2	66071
X27	AGEEDNVISQIQRPV	436870	451930	511430	835750	333730	1328100	1372600	662800	641990	1765400	278560	1520200	1847200	1297800	2143000	1001300	821370	878890
X28	AGEEDNVISQIQRPVK	20467.2	20898	20117.4	20779.6	1063100	47322	19642.2	20894.6	18723.3	294610	5986800	214690	420560	299820	308300	20598.7	20404.3	20890.1
X29	AGEEDNVISQIQRPVKEL	36610	36121	35570.1	35978.1	112640	49647	36517.4	810100	318410	764360	164730	579160	1134100	927990	1090500	637540	494800	657090
X30	AGLTETWNPNHPE	2470100	2156300	2244000	1655300	37126.1	37235.2	879250	37071.1	36846.4	204870	34476.9	37726.7	37761	37583.6	37490.2	772500	806890	379280
X31	AGLTETWNPNHPEL	80469.4	1423700	80989.9	2205900	1692800	80419.3	1469200	758770	630300	42663.5	79774.6	65608.1	81195	72538.4	78586.6	77317.7	77958.3	80922.4
X32	AILTVLKPDDRNSF	18760.7	19717.6	19272.8	24475.3	22596.4	21397.3	18503.8	23127.6	20093.4	61080	24564	24668.7	72603	24538.6	50057	24037.4	24251.7	23566.2
X33	AILTVLNSNDRNS	72589.7	69316.8	58293.6	96506.7	82817.3	62999.7	58423.4	64878.5	62867.2	83644.1	95743.2	96525	124950	108700	92031	96942	271870	376860
X34	AILTVLNSNDRNSF	180041	150428	150908	187823	188651	168308	148521	188663	141015	188680	371190	423510	671610	340870	557030	209020	429250	429620
X35	AILTVLSPNDRNSY	31312.8	24153.1	26008.2	31533.3	31579.4	31576.5	25042.7	31560.2	24556	89219	102280	143130	192100	99022	204880	31631	66599	92664
X36	AIVIVTVNEGKGDFELVGQR	34052.6	31279	35616	34323.9	42009.5	37893.7	33181.6	37869.1	38939.8	42523	47570	90705	41994.5	114550	42664.1	45118	42494.2	44621
X37	AIVIVTVNEGKGY	26094.5	22355.5	25977.5	24123.5	22486.2	23374.7	26053.1	24250.6	17315.3	244090	26106.8	162100	123020	26127	345820	283470	243920	167910
X38	AIVVLLVNEGKGNLELVGFKNEQQE	13375.4	13575.2	13679.9	14421.4	15244.1	13780	13341.4	15321.3	16655.2	21631	17171.1	25719	18632	35804	17216	17124.1	20506.2	31676
X39	AKLSPGDVFVIPA	279444	270840	294821	275788	302658	302088	267284	308434	312475	853760	312564	770160	459070	649560	448110	337280	312950	494010
X40	AKLSPGDVFVIPAGHPV	33177.3	28821.7	30491.1	29246.1	41617.4	30225.1	30571.3	41488.8	36626	112040	42628.6	57782	43460.6	128570	113090	39255.8	42662	63572
X41	AKLSPGDVFVVPAGHPVAI	19282.7	15426	16624.7	19242.5	17434.9	18000.2	16115	66726	19278.6	328510	19290	197130	378850	205570	513480	107560	183230	116390
X42	ALEPDHRVESEA	634371	2681500	1478100	3367600	631641	636060	1958000	598095	634579	514624	635886	537445	494075	567272	506325	499456	495614	544559
X43	ALEPDHRVESEAG	3829000	62066	61067.2	2484300	4127400	398630	1515500	52482.7	61800.8	61965.5	7954700	61580.4	60870.4	59998.7	56995.8	18448.8	59661	59372.2
X44	ALEPDHRVESEAGL	162410	174910	154580	151040	14767000	94221	205660	88898.5	93445.6	92434.2	18886000	94182.7	76843.9	79151.7	93951.2	91971.3	83211.8	76167.7
X45	ALEPDNRIESEGGL	1.13703e+06	1.1566e+06	1.11541e+06	2203900	2671100	1.14225e+06	1142400	1.05647e+06	982923	1.02572e+06	1.13707e+06	1.14233e+06	1.14076e+06	1.06678e+06	1.14137e+06	906879	1.10213e+06	1.13847e+06
X46	ARLSPGDVLVIPAGHPVAI	26423	20805.1	25277.9	24215.2	24660.1	24755.9	26182.7	26049.6	22738.7	127220	26349	81670	163450	102040	281870	122780	217320	57890
X47	ASSNLDLLGF	16620	15667.5	16416.8	15836.6	16883.4	16870.7	15587.3	16887.5	15758.3	34153	29430	26041	24692	29870	27155	21206	19273	16905
X48	ASSNLNLLGFGINAENNERNFL	8914.23	8728.44	9409.51	8662.85	11840.9	9031.44	8892.52	11868.1	10928.4	11901.6	28570	20819	11782.3	11895	11839.3	11643.9	11358.6	11003.2
X49	ASSNLNLLGFGINAK	45682.1	40471.5	38020.9	41744.4	45674.8	37831.8	38847.9	45607.3	43579.7	109660	167470	66601	50878	52616	82247	45696	80688	68831
X50	AVLTVLNSNDRNS	14093.6	12009.1	13735.1	11872.5	14663.8	12808.9	15140	14663.3	13447.7	24420.2	23783.1	24484	24457.4	22923.5	24030.7	134980	113840	24480.5
X51	AVLTVLNSNDRNSF	17191.7	11781.5	9826.4	12735.5	17220	15159.5	11539.5	16744.6	11655.3	58260	152560	17145.3	102810	17195.3	98812	15931.8	17106.5	14955.1
X52	DALEPDNRIESE	97474	4262200	3361600	3109200	96366	417190	1622800	93539.1	97392.2	93370.2	88801.8	97226.7	83949	97231.7	68448.7	83110.3	63188.4	90110
X53	DALEPDNRIESEGG	10275000	8859100	6373900	879105	413873	426950	2332100	4694900	962420	338577	425370	409745	255987	360162	375049	396901	296033	369168
X54	DALEPDNRIESEGGL	42593000	40568000	9.1833e+06	3.9251e+07	54900000	4378200	17512.4	29942000	7.745e+06	157490	7.8583e+06	419780	19312	93749	204890	149650	233740	128570
X55	DALEPDNRIESEGGLI	91550	60158	57300	85411	865070	33608	56906	191720	32990.6	25101.4	33428.7	31639.7	33301.5	29138.5	32552.1	31039.3	21793.3	32567.3
X56	DALEPDNRIESEGGLIET	10746000	6660700	9.1204e+06	7154100	250500	2049600	5537300	1441100	677220	96590	125260	76754	41865	42280	23939	170000	246370	133110
X57	DDEEEQEEET	27575	27585	82703	27248.5	26684.2	24456.1	27453.6	27359.7	27536.4	63078	26783.4	266110	197160	80024	253150	253150	232250	27626.3
X58	DDEEEQEEETST	1005200	1163000	75038.3	966530	153810	1015600	75081.6	73826.9	63390	88857	75956	74739.7	75246.8	126000	140620	71775.1	108840	161790
X59	DDEEEQEEETSTQ	32155.4	32122.5	110340	158610	219550	213760	205460	24397.6	32630.9	32786	113890	32611	31312.2	52261	77451	32775.8	32375	36483
X60	DDEEEQEEETSTQV	357030	65225.4	185640	212640	65799.6	438400	225900	540990	127480	99554	66288	290260	89592	156440	217750	157790	157120	189210
X61	DDEEEQEEETSTQVQRY	171310	172620	251430	326790	476800	348100	269160	107810	107293	175100	229670	271240	200580	283070	259570	354120	340110	342190
X62	DEEEGQEEET	66767	538400	757440	432020	37262.1	37343	37225.9	37296.8	22091.6	82051	36530	127110	165720	145290	74562	136610	193060	216100
X63	DEEEGQEEETTKQV	270180	914910	452760	596370	269897	341280	350240	1570000	707560	457500	270144	635230	516650	657040	708060	645340	594070	703060
X64	DEEEGQEEETTKQVQ	5948900	1643000	1626000	2071500	1914300	3983500	3930500	9.3606e+06	4128800	4568800	237250	7352500	4883800	8.2456e+06	7062000	4058600	4379300	5044600
X65	DEEEGQEEETTKQVQR	270560	70538	135420	258180	1282100	380850	204120	81909	67556	988180	5164000	1503000	1413900	1815700	1337600	68029.1	1134500	1050600
X66	DEEEGQEEETTKQVQRY	1003300	1399800	2028900	311530	3691600	2434800	2587200	73684.1	76639.5	77122.5	464660	1157300	177870	782180	691050	150890	78056	320900
X67	DEEEQEEETSTQVQR	38357.8	34676.5	36431.8	38431.7	220910	29758.6	35943.8	38023.8	32718.4	38442.9	600910	51579	37589.8	39761	38565	38574	43038	51651
X68	DIFVNSVEIKEGSLLLPNYNS	21748.1	18765.9	22876.2	19269.5	24520.2	23761	23228	26029	25202.2	84974	25928	95942	25970.6	98960	96756	25133	25439.1	25887.4
X69	DIFVNSVEIKEGSLLLPNYNSR	9661.72	9574.75	11026.3	9765.65	11361	11091	9838.29	10676.1	11282.5	23855	14670.9	39020	14931.7	17218	14894.6	14920.1	14956	14955.3
X70	DLAIPVNNPGQLES	42849	33714	30245	44782	1214900	114300	75865	30104	30143.1	393100	3066100	28232.4	30180.1	29847.3	241100	28469.7	27902.1	28945.3
X71	DLAIPVNNPGQLESF	16411.5	15432.2	15978.8	14955.9	457130	16131.9	16220	16430	13905.6	41771	171420	31046	38040	20593	37998	51494	37242	44178
X72	DLAIPVNNPGQLESFL	11936.9	9449.26	10550.6	10216.4	14331	12187.3	11450.3	12867	10192.8	74480	95283	38750	80100	46923	49067	66509	57245	12856.3
X73	DLAIPVNNPGQLESFLLSGT	1737.29	1971.17	1945.48	2145.67	2084.74	2010.04	1729.52	1986.83	1835.25	3800.9	2131.83	5099.3	3982.4	2137.02	2151	2140.24	2144.45	4940.3
X74	DLAIPVNNPGQLESFLLSGTQNQPS	13548.8	13189.1	14097.2	13574.1	13456.2	14052.9	13932.6	14112	12406.2	63522	14111.6	40222	108400	56040	49057	117810	99958	92979
X75	DLAIPVNRPGQLQ	121581	121528	106392	119723	121140	109411	88646.5	512400	121730	121249	121076	120691	645420	122859	553130	121558	121088	111258
X76	DLAIPVNRPGQLQSF	27717	27402.7	27500	23207	260260	27616.6	26809.4	27554.7	27516.4	616170	672490	545840	553190	456050	362490	476500	480810	621500
X77	DLDIFVNSV	14959.4	14083.2	14601.8	15918.6	15906.8	15861.1	14529.4	30740	15926	68190	15890.4	48201	64588	54831	53364	32476	22979	28007
X78	DLDIFVNSVEI	7055.64	7044.62	6978.51	39915	6775.3	216220	7052.8	2985.2	6464.7	67090	6831.09	161370	69804	62081	110240	7056.16	7110.3	8422.3
X79	DLDIFVNSVEIK	23817.5	23761.7	19759.8	23531.8	94739	166430	23814.6	109930	74863	112630	217380	89618	89143	88560	91856	23850	29615	40282
X80	DLDIFVNSVEIKEGSLLLPNYNS	47126.5	41239	44634.2	43493.9	47177.3	46790.3	42826.7	43122.5	43526.1	69370	47163.6	82992	86035	65415	122570	47954	54884	47179
X81	DLNFTPNEFDS	181150	10334.3	5436.97	4386.14	9293.87	9161.74	9278.9	110510	134520	9341.72	181000	14924	6420.5	9190.64	9379.7	7238.28	9336.67	7733.84
X82	DLSAPDLDNSGGGGSIK	16355.3	16946.4	105330	16448	16936.9	16551.6	16985.2	16408	15554.2	19886	14610.1	17234.8	28987	21327	17159	110130	116150	166000
X83	LCESNADCTNKGSGK	60474.3	55536.4	57391.1	58074.1	71467.1	51041.9	53039	61866.1	56870.2	77958.4	239870	72514.1	67977.3	70934.2	66177	72896	113480	72808.1
X84	DTIEKVLLEEQENEPH	5105.2	5562.58	7337.02	5452.14	7453.43	4754.33	5236.09	8239.49	5474.58	8336.3	8256.21	8294.67	29635	8228	8314.12	170620	68801	85378
X85	DTSNIANQLDSTPR	64131.9	57446.9	57534.5	70389.2	1528000	70803	70567.8	62870.6	46260.5	60725	96562	70499.1	69494.8	57399.7	69266.9	50008	41645.4	48298.5
X86	DVIVKVSREQIEELSKNA	101768	97812.8	109903	102044	109786	94971.7	103458	110603	104601	110649	110257	111030	110979	147830	154400	245630	244950	238560
X87	EAAFNTDYEEIEK	76076.7	76176.3	76654	74285.5	749580	53572	73018.9	353110	178760	77088	1487500	86486	68304.6	76489.8	74111.7	75885.4	85055	85519
X88	EAAFNTDYEEIEKV	103760	47659	28101	53072	28060.7	98810	62854	479630	337810	263520	27656.4	255910	640570	376280	603360	283670	285860	268890
X89	EAAFNTDYEEIEKVL	11036.4	11032.4	10685.8	10566.4	11056.1	10946	11106.9	127090	103590	70668	11111	72250	57338	90818	103790	61975	56017	93299
X90	EAAFNTDYEEIEKVLL	19591	8536.28	8500.68	7725.71	26037	8719.3	9396.6	8651.3	8321.43	90390	51152	137860	94093	140170	149780	115640	86178	120640
X91	EAAFNTDYEEIEKVLLEDQEQEPQ	27950.5	26090.5	29441.6	26170.9	29440.6	27422.1	28222.5	24868.4	25325.8	29455	29450.6	84548	33146	52424	61559	46441	45929	52911
X92	EAAFNTEYEEIEK	23699.6	17807.8	19759.2	21155.3	40377.2	14268.5	17176.1	23928.1	18578.9	44835	1933100	40647	33090.1	36265.1	31494.8	40143.6	139070	39484.7
X93	EAAFNTEYEEIEKV	174280	62937	73327	89646	213080	197780	116120	900880	533110	503960	25928	621440	1207400	1028100	1126800	663890	586620	733600
X94	EAAFNTEYEEIEKVL	52952	12511.1	12531.6	11791.9	73953	12484.1	11448.6	21268	12593	170660	26913	220310	160200	224040	257180	103170	86536	120320
X95	EAAFNTEYEEIEKVLL	51905	22220	22412	22035	40895	25777	20528.9	21784.8	19583.2	256400	77377	353820	260400	399500	422400	205130	201050	266800
X96	EAAFNTEYEEIEKVLLEEQEQ	14279.1	13894.6	14007.3	14524.6	15084.6	14490.2	13403.4	15077.5	13218.9	15104.3	15047.1	22915	23120	29889	25314	15105	15097.4	20945
X97	EAAFNTEYEEIEKVLLEEQEQK	76698.9	74280.2	81560.1	77767.9	81455.3	81863.6	78951.1	79638.1	78140.8	149040	81957	373130	156010	227060	234010	136470	135050	219020
X98	EAAFNTEYEEIEKVLLEEQEQKS	22210.3	20443.8	22993.1	23242.4	21691.8	22875.2	21792.9	21399.2	20130.7	23050	23007.5	41826	39490	33744	25375	30132	39936	35044
X99	EASFNTGYEEIEK	254530	160346	150547	157042	1284400	126316	136461	564230	218820	160497	2329000	254240	192810	160990	156218	159170	160058	160290
X100	EASFNTGYEEIEKV	107560	62713	52717	100300	95379	193300	106230	372010	137770	386120	36928	230520	260640	290440	300120	107290	75051	101380
X101	EASFNTGYEEIEKVL	9037.97	8100.85	8118.46	9499.36	10057.7	8739.47	8294.22	28796	10300	21563	10281.3	12598.2	20389	19495	22520	10240.9	9659.83	10292.5
X102	EASLNTKYDTIEKVL	18354.1	16550.9	19427	18987.3	23806.8	21553.9	17864.1	20050.4	20351.3	23605.4	23638.3	54934	23228.3	68177	23720.7	27433	23851	23571
X103	EASLNTKYDTIEKVLL	25179.6	26471.8	30248	23393.9	21881.7	24718.9	24055.5	28490.3	30301.9	113080	30454.8	152590	30425.9	163280	30460	113930	116200	193500
X104	EASLNTKYDTIEKVLLEEQENEPH	106620	112599	108754	121587	123855	104456	105499	108812	101668	123900	123854	176160	166770	181680	154420	167660	190720	374910
X105	EASLNTKYDTIEKVLLEEQENEPHQ	13374.7	11974.8	12040.8	12366.8	14334.1	12565	12062.1	16223.7	14960.7	32368	16177.7	18074	18005.3	41952	24553	15565.2	18026.5	19502
X106	EDEDEDEEE	27595.2	25028.9	24114	25784.4	24874.5	25252.4	25052.8	25288.1	25402.1	30206.7	28465.8	27633.8	30237	30119.2	29979.6	35606	49533	30290.4
X107	EDNDFETKIDT	1397600	849050	368929	837500	146505	149100	641720	725610	193410	128643	146900	140521	110449	148275	145975	107570	111829	124441
X108	EEDEDEDEKEE	141018	140786	124570	145425	121284	131306	134143	103770	120876	145390	134958	287970	145660	207180	216010	145493	237790	358380
X109	EEDEEEKEQ	45011.2	43321.6	38525.7	49861.1	44272.2	40935.5	40335.2	39608.4	41680	46594.7	49048.7	49902	49819.7	49804.1	48436.9	49851.6	89986	91377
X110	EEEEGEWRGSQ	391340	468890	48455.6	114030	42375.3	47922.2	97356	47351.1	34986.4	47433.8	48605	48328.8	34161.1	42896.5	44132.7	34434	29783.8	38913
X111	EEEGQEEETTKQVQ	243020	128670	66577.4	68302	214070	325560	329740	66581.3	689600	207550	66530.3	286130	188670	445320	384240	227420	197980	66976
X112	EEEGQEEETTKQVQR	34117.8	34027.3	41118.5	36496.5	70554	35330	39423	46478.8	40381.6	46546	292160	73058	46422.2	73412	46441.7	61750	46502.1	46542.7
X113	EEESEEQNEGNSV	564070	407140	95656	231360	456550	93968.6	219440	94333.7	89122.2	95476.8	1812900	95645.9	69280.6	88607.8	94873.7	65956.3	73920.6	83560.6
X114	EEESEEQNEGNSVLSGF	6411.9	8100.52	7792.98	8589.19	163260	5225.93	6259.34	8602.16	5660.85	8621.8	70762	21636	43748	26959	19815	78836	53936	1062100
X115	EEETSSESQER	16684.8	14760.3	16116.3	17174.9	27823.1	15245.5	16806.5	22438.8	17313.4	34010	311630	33608	29612.5	30107.2	35346	24443.5	27745	26815.4
X116	EEVKVEVEDD	102403	106956	102859	114370	104796	137990	114211	102433	105639	107095	103678	110764	110614	108567	109952	116505	108021	108354
X117	EGSLLLPNYNSR	31073.1	29747.8	30118.3	32750	2871100	83230	47600	26585.9	22505.9	22608	32293.1	32635.4	32300.1	22979.8	32398.7	23294.9	15110.2	18538.1
X118	EIKEGSLLLPH	560090	549041	506986	596952	575797	541244	499218	590642	529165	596825	597224	597430	825110	724040	597303	596879	792140	924350
X119	EIKEGSLLLPHYNS	144948	141465	136898	147468	142712	147020	134022	154824	137748	157661	147342	159360	200190	157708	157740	148824	155107	151216
X120	EIKEGSLLLPN	8.8577e+06	9236.2	8196000	4967.52	318550	4163100	8932.97	3242400	2285200	3131600	19519	2201000	2445600	2402600	2984500	6.4787e+06	4964900	4153900
X121	EIKEGSLLLPNYN	6658.23	7019.6	9395.49	7914.69	9323.06	6945.22	9456.76	8565.52	9487.92	173750	107760	268900	9539.3	306740	371730	9528.61	9534.61	128480
X122	EIKEGSLLLPNYNS	1472500	734050	846140	1150000	196120	1621900	994800	105618	105890	3307900	108150	3476700	3903900	4142100	8011900	1672400	1842600	1745900
X123	EINEGGLLLPH	1568300	1533400	1527600	1394100	89363	1147400	1039000	635060	518300	1328300	602460	691390	1249200	709710	589880	82889.4	866360	1150000
X124	EINEGGLLLPHYNS	59113.3	63060	80369.3	66117.7	87399.5	66619.6	74527.3	87259.3	68118.1	136560	87520	141060	152920	225210	238330	283170	105570	247940
X125	EITPEKNPQL	2763100	3096000	2795700	4830200	17346000	4628800	7.2495e+06	6663300	5538700	1668700	23016000	1425500	1871200	806820	413480	1680100	1397300	1159800
X126	EITPEKNPQLQD	3564100	2736000	1468200	2002400	11400000	634480	1652200	1743500	2181000	36156.4	14869000	36569.6	36596	34936.6	34873.2	36354.5	36177.1	36430.2
X127	EITPEKNPQLQDL	339530	225160	271600	388930	3691100	174250	87663	1442200	325540	85460.4	15087000	552860	803110	635740	567740	884340	612860	895120
X128	EITPEKNPQLQDLD	50578	46795.2	46538.9	48575	1150300	44498.5	51065.7	50995.1	43543.1	51516	1289600	51445.2	50086	43490.2	51474.5	50877.5	45026.8	43594.9
X129	EITPEKNPQLQDLDI	251740	136270	172260	301730	1672800	235500	251130	532580	266800	126567	2546200	373700	659330	412770	924450	352220	249820	310880
X130	EITPEKNPQLQDLDIF	182040	180462	169930	178760	2248900	181339	182493	182758	165873	275800	4232700	218590	419580	225770	382880	266950	183480	185040
X131	EITPEKNPQLQDLDIFV	26356.2	27660.2	26599.5	27515.6	27805.4	22588	21066.5	169090	27813	44312	29350	53995	71528	54693	49304	110790	82754	88481
X132	EITPEKNPQLQDLDIFVN	68413.6	62835.3	63491	69261.4	69303.3	64501.3	54219.5	616320	91743	469740	69378	322640	412450	341310	322550	303080	210470	255620
X133	EITPEKNPQLQDLDIFVNS	9295	12606.3	12765.5	10781.7	11953.9	9220.67	11186	42021	12864.3	33436	12824.9	12955	12887.3	15854	12901	52199	12864	27101
X134	EITPEKNPQLQDLDIFVNSV	45377	40757.6	46368.9	45793.7	44313.1	46244.5	41276.7	220600	46528	512210	46525.1	344860	497020	481090	445370	597140	371380	323850
X135	EITPEKNPQLQDLDIFVNSVEI	4872.72	4331.49	4519.6	4918.27	5979.53	4824.64	5572.16	5383.9	4770.15	6007.18	25539	6053.37	6041.65	6073.9	8566.9	5246.42	5556.72	5443.9
X136	EITPEKNPQLQDLDIFVNSVEIK	40518	36715.6	40276.1	40997.1	44187.6	42479.6	37975	51021	42171.2	166540	254640	93157	111040	135990	84659	63390	61184	44211
X137	EKIPGTEQS	228410	2655500	4632500	2086300	229107	229876	1413200	231550	1173200	193675	131744	154697	150242	229774	179635	224007	183411	217686
X138	ELAFPGSAQEVDR	70538	67849	122910	101090	2086400	135600	67682.5	64466.5	57930.2	239910	11168000	246150	191300	160990	274330	66567.5	77558	150100
X139	ELAFPGSAQEVDRL	23844.3	20770	23478.4	21553.6	485590	21443.3	23147.5	24530.9	21226.7	24838	369300	58355	24617.3	24268.4	24802.2	22284	20528.6	24315.6
X140	ELAFPGSSHEVDR	8903.7	5828.07	7139.97	5880.45	13375.4	9453.59	9565.92	9885.11	8799.14	698150	14617000	246260	14054.7	14315	286790	13014.5	14458	13959.9
X141	ELAFPGSSHEVDRL	9094.6	9257.56	9426.73	9406.71	8807.84	9098.55	9291.3	16928.5	11335.8	114290	17435.5	19843.1	20674.4	20665.1	20399.3	25012	20689	22377
X142	ENDDEEEQEEETSTQVQ	77305.4	1578500	2323100	609920	76984.6	457700	348810	77446	76015	68466.1	57831.7	70692.5	77138	77401.2	60937.3	77367.9	56163.1	73556.5
X143	EQIEELSKNA	951050	275320	504080	395630	196260	1299500	401230	28229.2	2101800	2305900	26995.9	2823200	2281500	365540	1201400	28267	102240	27490.5
X144	EQIEELSKNAK	430655	392807	427853	416920	494356	432034	461049	460628	445976	498828	1589900	946090	495330	849150	721550	509290	609730	499010
X145	EQSPGQWRP	551320	438590	1171300	1515700	221050	1655300	1260000	218415	220524	220842	211889	1485200	1325900	1469900	380970	1907500	2148200	1350000
X146	EQSPGQWRPS	141130	70468	49718.4	76745	57106.6	72934.2	54154.1	73124	75661.9	186690	76139.1	76188.8	161850	240470	145370	76520.8	661810	76380.7
X147	EQSPGQWRPSHGKEEDEEEKE	61980.4	47702.7	31512.5	61981	41040.6	43341.7	39573.5	34574.8	42421.8	62121	52460.3	61165.5	61850.6	62064.4	61904.7	61769.4	437610	198800
X148	EQSPGQWRPSHGKEEDEEEKEQ	256356	250170	258615	251030	270090	254813	267772	269272	260918	296455	296331	288474	296085	293174	296423	453820	406530	296490
X149	ETWNPNHPE	1.22124e+06	1561500	1.56042e+06	4719400	1.56143e+06	4781500	5047400	1.32126e+06	1.56137e+06	1.34704e+06	1.29765e+06	1.55947e+06	1.49142e+06	1.43914e+06	1.53445e+06	1.36644e+06	1.40005e+06	1.26169e+06
X150	ETWNPNHPEL	2536900	2454500	4083300	7982700	3839300	6916200	10050000	4995800	8250200	18525.1	18893.8	1213600	18618.7	940900	18762.4	18614.7	18466.9	18973
X151	EVDRLLTNQ	202004	202504	189180	215732	216438	205620	177316	343800	222723	406670	237254	237810	513510	300040	236601	235887	236340	234729
X152	EVDRLLTNQK	563713	587774	611621	594641	619178	592876	553852	622681	603899	1310700	926380	1056300	1242300	1144500	620690	1051200	905580	1118300
X153	EVDRLLTNQKQSH	33594.7	33474.2	33131.5	36295.3	35025.5	35125.5	31196.3	44319.1	36180.6	84220	44241	44378.5	82095	44437	44393.8	43764	44365.3	40811.3
X154	EVESSDTIDNV	563830	485890	463300	241170	164693	164208	164800	164361	131756	159232	161017	160052	155182	154679	144349	164195	155385	164388
X155	FDKRSDLFENLQNY	39178.2	35676.8	32078.1	36847.2	35907	33054.9	28760.8	39186.3	23641.7	39183.7	31460.7	39261.4	188600	38975.2	181910	39273	39078	39069.7
X156	FEITPEKNPQ	11055000	13441000	15249000	29999000	906940	899038	24311000	893009	902569	19434000	3946800	11186000	1262900	10522000	2557700	15788000	18666000	13995000
X157	FEITPEKNPQL	24766.2	23794.7	23366.6	21940.1	4387600	25791	25133.1	20558.9	21208.3	25340.2	3.6472e+06	25011.6	24798.8	19538.1	28872	22993.1	18355.2	18983.5
X158	FEITPEKNPQLQD	240310	236540	117570	212370	1850800	112340	241770	252550	88803	117950	3483600	92265	88804.7	122930	89076	1049500	567870	708990
X159	FEITPEKNPQLQDL	62595	39173	28787	26776	997380	29344	39299	26542.1	25869.1	629730	1284900	500490	737820	887490	325460	466180	478910	647020
X160	FEITPEKNPQLQDLDI	19009.7	17325.2	16048	18906.8	204020	18063.3	18631.1	81740	18274.3	110670	2283200	19213	40299	27664	53262	60264	52689	33494
X161	FEITPEKNPQLQDLDIF	30234.7	26534	29434.7	29697.1	30184.7	30238.2	30046.3	30239	22443.8	341310	1394900	417280	451310	446400	544720	651530	515850	357600
X162	FEITPEKNPQLQDLDIFV	127778	129043	153448	132877	153064	99551.2	133095	152525	111663	154040	781650	168240	185230	195420	216860	1399500	1444900	871110
X163	FEITPEKNPQLQDLDIFVN	20030.3	17079	19882.4	18984.3	18930.9	20061.3	19338.8	20078	18759.7	213520	19870	141320	144230	158390	192680	105510	193630	138540
X164	FEITPEKNPQLQDLDIFVNS	79624.3	86790.7	103099	84465	103134	65427.2	88482.7	102994	77570.1	130930	533070	148200	103320	166130	140760	889990	664170	647290
X165	FEITPEKNPQLQDLDIFVNSV	270951	230470	242843	238438	245622	261954	239782	239807	270560	478830	270598	566650	375510	567270	520150	271040	428480	273490
X166	FEITPEKNPQLQDLDIFVNSVEI	10889.6	10550	10931.3	10595.1	11153.8	10869	10830.8	10928.1	10884.5	14027	11698.4	14691	11908.3	11912	16104	11900.2	11859.6	11908.9
X167	FEITPEKNPQLQDLDIFVNSVEIK	114053	104937	112120	109839	106503	114062	102797	112396	114076	340430	114100	392300	287080	433450	272340	184880	258400	299720
X168	FELVGQRNENQQEQ	38896.6	39129	38418.2	44878.4	43031	41896.3	36744.1	56554.6	43838.1	132470	55897	56607	143330	62478	56541.4	55526.7	58243	51984.8
X169	FEVTPEKKYPQLQDLDL	7890.53	4757.74	6425.44	5026.71	10478.3	5195.69	10259.4	8830.08	4411.79	10540	590000	8900.72	24950	10377.6	64160	829600	564870	10537.8
X170	FFEITPEKNPQL	607440	351470	186844	242760	523660	874490	195270	193378	185836	2015500	707930	2411300	2169400	2251000	3086800	190518	194320	190296
X171	FFEITPEKNPQLQ	998880	645940	768950	523350	420910	2157900	313201	301773	296548	3524400	4686300	2896300	1349600	2201100	3146400	314390	341910	326190
X172	FFEITPEKNPQLQD	25672.5	28439.8	29855.3	28980.8	34510.8	16770.2	22103.6	179690	34587.8	81705	162430	47853	43730	45012	58845	34658	38637	46864
X173	FFEITPEKNPQLQDL	110875	77195	83648.3	101371	193830	134820	69486.1	134213	84468.7	7966500	6697300	1024500	1288700	1107500	1206000	168540	344140	390000
X174	FFEITPEKNPQLQDLD	19419.1	23322.2	21780	21819.7	23139.6	14284.2	13995.9	114150	23367.1	38154	40371	29014	57253	23405	26579	23267	23480	26261
X175	FFEITPEKNPQLQDLDI	62413.8	62462.4	62287.5	61220.3	62334.7	43960	58089.5	570010	139570	112740	555180	174260	100860	163900	236320	62480	96341	100660
X176	FFEITPEKNPQLQDLDIF	22194	10415.1	14004.9	14788.1	21548.3	21582	21795	22037.2	14226.6	21998.9	984840	342110	310380	273580	448570	103020	165000	22140.1
X177	FFEITPEKNPQLQDLDIFVN	20605.7	17665.5	20567.4	20705.9	18607.9	20424.4	20455	20706.7	20380.8	470140	20795	416810	391550	368380	450990	105660	221120	173460
X178	FFEITPEKNPQLQDLDIFVNS	8336.81	7248.79	7344.53	8371.67	7479.43	8372.71	8212.76	8352.62	8308.8	138250	8382.8	111810	88593	101990	97490	21558	58798	86407
X179	FFEITPEKNPQLQDLDIFVNSV	46631	17915	15452	8037.42	8252.15	8351.6	6464.07	8236.86	5832.04	1973700	13386	1192800	1946600	1383000	796150	505420	674510	314810
X180	FFEITPEKNPQLQDLDIFVNSVEIK	18622	14370.4	16006.6	18164.4	18279.9	18605.9	15646.7	18378.7	14820.4	780040	172980	682340	426650	838410	552360	107580	175580	232470
X181	FFEVTPEKKYPQLQDL	53366.8	53036.3	52749.6	55978.2	58001.7	54484.2	50028.6	72655	60523.2	117060	65078.1	71899	112850	100410	68544	63519.9	65007.9	65252
X182	FFEVTPEKKYPQLQDLDL	31167.7	27401.4	23751.5	31077.5	27619.6	27797.4	26784.5	33835	30922.6	52282	31313.9	165460	68252	103070	174770	31354	111410	111450
X183	FFEVTPEKKYPQLQDLDLL	22422.3	20099.9	21370.1	21516	22057.2	22211.1	21764.6	18630.1	19308	27194	23258.7	88121	32724	57534	84540	23250	39504	42984
X184	FGKFFEITPEKNPQLQDL	2947.15	2980.99	3073.92	3221.51	3052.97	3140.84	2728.92	9370.42	4717.41	360180	11653	14947	17786	25595	14892.3	14747.3	14425	14321.5
X185	FGKFFEITPEKNPQLQDLDIFVNSV	35109.7	27447.2	29780.5	28577.4	33865.7	31087.8	30525.2	29649.9	31276.3	89063	34844.6	90615	38107.2	100060	115980	35367	65429	45662
X186	FLPQFTDADF	6288.66	7161.1	8126.09	6989.63	7440.48	9100.83	5357.39	21437	28221	161880	9340.2	244800	237030	140280	9316.16	7033.29	9332.8	9330.7
X187	FLPQFTDADFI	9311.43	11088	9526.8	20065	9285.86	9450.94	17096	11486	8869.88	95702	9385.37	65838	122850	48920	88197	41707	29900	31458
X188	FLPQQTDADF	14235.6	11244.3	14308	13021.9	9316.11	14101	12571.2	13991.9	57178	171050	23974	175240	280900	145500	13959.2	14116.3	100820	14237.9
X189	FLPQQTDADFI	8244.16	7749.72	8726.26	8578.33	8178.38	9302.24	7068.08	10714.4	9089.38	91036	10805	49042	29720	27001	24124	10802.8	10769.6	22634
X190	FLPQQTDADFILV	10188.1	10116	9165.89	10030.6	10189.1	10098.9	7532.29	32237	10219	10192.3	10152.5	22094	50783	21206	26625	10187.3	10569	10183.9
X191	FLPQYTDAD	71132.8	70436.3	69702.4	71155	65853	70222.8	68786.9	67326.9	71313.8	93937	71232.6	88574	71289.7	84884	71346	72938	90775	93472
X192	FLPQYTDADFI	27750.4	28550.2	30122.5	29875.9	29802.9	31567.2	27260.7	34602	28735.7	75155	33665	50240	96541	40006	39688	56269	38279	36192
X193	FLPQYTDADFILVVLSGK	8072.21	8372.07	9709.73	8243.94	9120.48	8688.73	8350.16	9728.36	8205.72	11886	10491.2	14024	18877	10266	9739.8	34383	19377	15954
X194	FLTGSDDNVISQ	82214.6	101427	101603	343620	1462100	101730	280040	101031	79620.8	78638.7	100863	96339.1	99602.9	90288.4	101583	61801.6	63008.7	75060.7
X195	FLTLFENENGHI	14771.1	14635.7	15755	15058.3	14976.7	15588.9	15050.5	14158.8	14346.8	23279	15754.9	35002	19192	24170	28825	15766	16316.6	22665
X196	FLTLFENENGHIR	24968.8	23317.9	23595.4	24577.5	29940.1	23304.2	22526.1	30071.9	24286.7	30104.1	28650.7	30125	45914	67977	59496	29931.4	29987.9	52998
X197	FNLEEGDIM	9770.53	6782.3	11911.6	7269.99	9856.31	11586.1	9888.13	40503	11988.3	240450	12002	141380	15114	51729	79536	79307	18125	50895
X198	FNRAEDLATAMEAR	43087	13557.1	13667.3	13371.3	58922	12925.9	13609.7	6668.74	12660	317410	13857	542730	13782.8	483260	744070	13782.9	451950	387520
X199	FNTDYEEIEK	190687	238418	239787	239093	216017	212957	165406	2499700	3082200	1382900	239830	237780	1302700	239188	237587	1303500	1170000	1828500
X200	FNTDYEEIEKV	134730	130510	168750	493030	64595	359170	561750	64276.8	64560	63992.7	63307.3	65126.3	64257.6	62215	63664.6	55425.2	63633.8	56202.4
X201	FNTEYEEIEKV	376350	407720	315360	654970	17153.5	648960	943280	785750	187250	16645.9	17154	17143.2	17063.1	17132.5	17061.8	17079.4	17081.8	12317.1
X202	FNTEYEEIEKVL	14595.4	12846.9	13030.2	13645.2	13328.1	14496.4	12959.2	25129	16264.6	52607	16120.2	26953	25065	22596	36910	16219.9	16289	16259.2
X203	FNTEYEEIEKVLL	6667.85	6161.99	6701.48	6559.71	6686.73	6669.45	6713.08	6718.9	5893.77	25385	6698.65	38800	27599	28496	47785	19589	17984	28755
X204	FNTEYEEIEKVLLEEQEQK	22446.4	22341.8	22299	22191.9	22425.3	22065.5	22318.4	22809	22548.2	24962	22787.7	22811	22808	22809.5	24834	22800.7	22804.4	23782
X205	FQTLYENENGHI	1219500	600220	868470	558460	246650	907760	500820	239746	244434	3053400	239918	2420900	1011100	2161400	2623000	246613	610800	979260
X206	FQTLYENENGHIR	106799	76087.4	92936.1	109782	291550	113304	99960.3	114285	86438.6	272630	3069300	542240	421450	461540	580890	114410	225950	322530
X207	GDAMVNILSGEAEITIEGTI	16269.2	10080.2	7947.08	16246.1	13327.7	14489.7	7516.36	92380	36621	603110	81862	16422	275020	16361.3	15293.9	16378.7	148250	16268.1
X208	GDTIKLPAGTI	1.81441e+06	1.78246e+06	1.8135e+06	1.9706e+06	1.89793e+06	2.01158e+06	1.70435e+06	1.94096e+06	1.73511e+06	2.25773e+06	1.9517e+06	3095300	3392800	2258100	2.25688e+06	2.12009e+06	2.1691e+06	2.2579e+06
X209	GDTIKLPAGTIA	15832.1	15064.8	16340.3	15626.9	5183	15791.1	47217	15033.7	16088.9	1640200	16723	16544.8	16637.1	13624.1	16098.2	1952900	1274000	17951.7
X210	GDTIKLPAGTIAY	7344.75	7710.22	6627.9	7471.18	2175700	7189.48	8110.6	8744.61	6455.32	8479.96	847670	8385.06	249770	8863.9	96859	144610	8469.83	8583.88
X211	GDTIKLPAGTIAYL	61944.5	53207.4	57134.7	60784.3	123490	61657.6	56896.9	61882.8	55688.3	130220	274700	130070	116670	94667	125410	61974	83980	88193
X212	GDTIKLPAGTIGYL	42298.4	35669.7	42415.2	41022	188510	41394.3	40501.3	42488.6	39970.5	112220	363530	93208	42597	87774	42205.6	42245.2	40526.2	48932
X213	GFGINAENNER	337770	11466.4	11402.3	11564.8	6906800	11478.3	10995.2	2075000	11402.1	11604	68641	1659300	103430	1624500	2210100	1420700	1105000	2147500
X214	GFGINAENNERN	84809.6	96227.5	94784.9	101000	171067	138807	174710	172392	2121100	172439	86422.9	175360	152611	195220	274180	169621	117695	103969
X215	GFGINAENNERNF	237917	255548	256059	250766	278084	241044	245225	283921	252864	364120	283286	289945	293220	283922	283853	373110	284150	475810
X216	GFGINAENNERNFL	144160	77811	48394	66927	140980	212690	49426.9	49605	48223.6	377470	108780	866690	543140	838780	1136700	226770	281610	272370
X217	GFGINAENNQR	17782.4	10570.3	10007.5	19914.2	3649100	6772.66	13354.1	20289.3	20706.1	67435	5431000	20797	20795.7	1037000	20174.8	184810	571400	754290
X218	GFGVNAENNQ	178033	168694	187685	169367	186506	187740	182938	186932	178178	388540	187694	825720	437940	600740	672710	560300	381040	604900
X219	GINAENNER	307874	283384	286268	311168	22741000	301546	305730	309569	259398	309752	10611000	595960	359530	308349	320674	317020	261838	272546
X220	GINAENNQR	148875	134426	147356	151366	247837	134248	147122	199962	156571	295479	2529100	315150	249963	268557	269572	227558	258155	233652
X221	GKFFEITPEKNPQ	58734	75188	59063.8	56007.7	52214.3	54803.2	55707.6	51142	51050.7	50986.4	52507.1	50561.3	50626.7	50155	49976.7	51155.3	49113.5	50727.6
X222	GKFFEITPEKNPQLQDL	14744.5	15998.7	18432.9	15216.6	27018.2	16160.3	18487.3	26024	19843.5	28429.4	24081.5	26335.2	27634.1	27069	26443.1	118730	35847.6	34512
X223	GLHLPSFSPSP	1863300	1722500	694610	365800	175920	1132600	175129	415780	172236	615840	172746	912670	730640	816160	174337	1233900	1541600	680890
X224	GLHLPSFSPSPQ	5104500	3367300	2391600	2583200	8046.11	3108200	2431200	1658800	1988400	594170	905120	7909.75	8076.4	8046.99	7330.21	8104.3	1833100	7963.17
X225	GLTETWNPNHP	26479	28421	44185.8	29068.9	33806.5	21706.9	31171.5	41652.4	33613	45296	44389.9	45068.1	44910.9	45227.5	45154.3	749010	579270	614740
X226	GLTETWNPNHPEL	4143400	3031800	4987900	3691700	736020	3447000	3416100	1051900	1174600	377361	377795	588090	907420	380850	581780	500530	572560	393100
X227	GNLELVGFKNEQQE	34408.9	33170.9	34839.3	33074.1	37219.7	32774.3	35291.5	34546.2	33574.1	49058	36740.1	45857	37228	41722	72576	37208.3	36719.4	43337
X228	GTKPEYGSTNT	495719	2929700	2994800	827580	428556	465386	480820	434719	375873	364630	322890	356053	366587	370183	310126	435364	353035	414485
X229	GTKPEYGSTNTGSG	6923200	4550500	3279700	260130	299720	259333	492570	255869	233594	247892	345150	228289	165150	217260	189269	258661	178416	252785
X230	GVNAENNQR	44383.1	41380.6	40004.3	42348.2	1254700	38909.6	44666.5	44281.4	36108.7	44792	1471700	43932.9	57843	41389.7	59997	44572.8	38393.8	41692.1
X231	GVSSESEPF	30825.7	31410.3	37187.9	30165.2	37326.2	33018.6	37402.9	37432.9	37561	83599	137220	97862	37544.1	93566	56299	119830	72858	90779
X232	HAGDLGNINVGDDGTVS	475150	153000	407120	54896.2	62799	62761	59536.7	62701.6	44182.3	59576.7	59749.2	55025.5	50566.5	50927.1	48063	62658.7	52548.8	60953
X233	HAIVKVSREQIEELR	31039	29226.1	29866	30623.3	30775.3	22803	18691.5	31035.9	19739.3	30979.1	30870.1	30927.4	240890	30898.3	30937.3	310840	312470	502820
X234	HLPSFSPSP	2377400	2136500	1784900	2106200	547220	2753700	1634300	22248.3	22273.5	1817300	1645300	1347400	1150900	1191800	22008.2	22287	21223.8	21912.8
X235	HLPSFSPSPQ	8.2257e+06	6773500	21546.7	9.4298e+06	21961.6	7085100	21627.2	21722.6	21684	2875400	4833800	21940	21657.3	21628.3	21967	5947.47	21797.4	18891.9
X236	IAGDSIGEEVEK	16668.5	13635.7	10056.3	17692.4	20889	12312.9	8426.27	20841.8	9988.53	312230	398210	118120	319080	20907.8	21046	97155	108310	125770
X237	IAPVDTKPQTGGGY	39418.8	38063.8	34029.2	32477.8	14634000	24446.6	40773	38411.6	27328.7	40196.4	3.8775e+07	40786.5	40796	40685.9	40550	140660	106480	56198
X238	IESEGGLIET	139858	148512	1357000	149522	142009	2104000	870240	384490	1158900	573390	149630	769310	522740	673860	149154	1367700	1146000	1091800
X239	IESEGGLIETWNPNN	312550	164290	6815.15	260030	38299	429240	266360	202440	311880	6807.71	149780	6839.2	5884.79	6673.27	6835.96	3414.43	6812.64	5142.28
X240	IESEGGLIETWNPNNR	36904	22782	18805.4	22657	342390	13143.8	22553.1	21907.5	15560.3	22773.8	6.6019e+06	22422.7	18047.2	20742.1	22625.1	18990	22693	22090.1
X241	IKEGSLLLPN	3134900	4269400	5485.22	5646.15	5491.13	240630	4309.7	5452.62	5539.45	3081.01	4951.34	4995.94	3282.33	2826.51	5681.9	5444.06	3130.82	5544.01
X242	INEGGLLLPH	10493000	8.7646e+06	6146400	7344200	1484500	2897400	6780900	2824500	2510800	363211	3156200	367057	366062	367714	364855	367830	384570	362883
X243	ISLTDTGSSNNQ	863570	632060	34763.9	221240	507490	80542	34908	186740	37908	33877.8	241200	31908.8	32410	30745.3	34605.9	24137.8	26944.7	34579.6
X244	ISLTDTGSSNNQLDQMPR	575650	353540	116410	88309.7	720930	89455	88108.5	253010	176520	88031.8	1154700	89170.4	70443.9	80811.9	77466.1	80805.6	80251.2	89328.9
X245	KEDEDEDEE	7616.17	8536.24	8840.95	8830.85	8901.6	93483	171670	2754.12	8950.6	53300	29346	82602	8928	59677	39574	8883.09	8879.37	58400
X246	KEDEDEDEEE	11802.7	17067.6	7080.67	63950	16935.5	1431200	17207	17233.5	17367	51082	37507	187810	165950	77486	82764	255960	89541	142480
X247	KEDEDEDEEEE	4906.41	13798.5	13197.8	13964.5	13396.4	1764800	347900	5164.1	13765.8	17160	8630.97	15114	13811.7	12226.9	13826.4	445170	13749.7	14057
X248	KEDEDEDEEEEE	14642.8	14805.4	31269	14884.2	14710.3	13293.7	14925.4	12135.2	12305.3	17827	14587	55660	26512	22290	14911	112370	165580	182260
X249	KEDEDEDEEEEEE	174111	173515	175717	173441	181433	174692	177270	179681	177197	184540	183523	182094	184558	183189	184229	215090	199170	184570
X250	KEDEEKVVEEEEGE	553250	401280	707690	338340	193061	216750	220540	489340	193697	167000	193706	193634	192448	173996	184579	193449	182727	193990
X251	KEDEEKVVEEEEGEW	1416900	1043000	1641600	1632400	210960	1180700	1123900	23645.7	23616.7	23654	217600	23484.7	21905.1	19584.5	23118.6	23024	23640.9	17341.8
X252	KEDEEKVVEEEEGEWRGS	1075700	672710	660660	44843.2	44742	41717.8	45277	45508	28769.2	43673.2	44795.6	42813.8	35762.8	34926.2	32356.3	45039.7	29254.8	44561.2
X253	KEDEEKVVEEEEGEWRGSQ	2448000	1752900	1112000	802070	272360	144610	475780	1084400	242380	139950	144489	130949	119780	130678	134151	144155	142052	144412
X254	KEEAWTLFEKHS	569810	650070	379540	752910	335210	584460	520010	526290	329950	3010200	7.3055e+06	3620200	3427600	3455800	3026000	3451500	4221800	4051800
X255	KELAFPGSAQEVDRLLENQKQS	18583	17117.3	18023.5	16735	20142.6	19067.6	17273.7	22575.8	24412.3	57838	25110.7	40373	25214.5	79087	25391.9	25207.1	25468.3	25471
X256	KGVSSESEPF	34833	10138000	10905000	17529000	9831400	33572.7	15824000	34369.9	15187000	34681.8	32531.3	14612	17461.5	61985	36818	33205	20920.7	24906.5
X257	KGVSSESEPFNLR	15398.3	13800.5	15036	15871.6	27541.6	13442.6	15054.3	21419.3	15869.5	38515	454790	31722.7	27736.7	28425.5	30415.2	24732.3	29926	26288.7
X258	KSKPHTIFLPQFTDADFILVVLSGK	16763.6	16730.3	17693.8	16643.6	20090	16874.6	17911.9	19166.7	18035	20103.3	20134	20019.7	20132.6	20061.9	20045.5	37164	26578	22866
X259	KSLPSEFEP	240375	249259	319218	267463	269277	216021	257753	303532	274147	321190	319029	321018	320508	321533	317184	1319800	1388200	1490300
X260	KSLPSEFEPF	1.16647e+06	1.1661e+06	1.16349e+06	1.1705e+06	1.16587e+06	1.16413e+06	1.15889e+06	1.24108e+06	1.19499e+06	1512100	1268200	1.25991e+06	1.26757e+06	1.26766e+06	1.26819e+06	1.26772e+06	1.26539e+06	1.264e+06
X261	KVLLEDQEQEPQ	261280	248370	160230	159657	152457	159792	152555	160104	146698	159923	158871	159073	159358	149460	152360	159621	147407	157625
X262	KVVEEEEGEWRGSQ	221300	202370	199480	196918	197271	196274	191516	196487	189320	194744	195054	194104	198713	192622	193067	197862	196163	193038
X263	LAFPGSAQEVDRLLENQ	24836.5	21554.7	23685.8	23410.1	23192.9	26331	22725	26563	26459.7	78032	26476.8	59614	48867	39050	63272	26426.1	26964	26528.7
X264	LAFPGSAQEVDRLLENQK	34304.7	30607.4	28862.1	34513	34456.3	31401.7	27695.4	75069	34663.4	123920	34723	70638	251490	91303	387240	42436	56095	68667
X265	LAGEEDNVISQI	18532.5	15997.7	18102.7	18474.6	375720	25753	25285	30445	18307	41704	18452.9	50666	68645	46262	51282	18535.1	18248.3	18572
X266	LAGEEDNVISQIQRP	23911.9	24494.3	27388.5	24429.6	27816.3	28363.4	24424.8	26169.6	28401.4	63118	33835	104970	43976	39283	38034	36227.5	35120.3	37816.5
X267	LAGEEDNVISQIQRPV	20547	17903.5	32190	34831	20676	136200	92036	20459.5	20571.7	168720	59771	148140	498640	171490	119930	111340	213390	166030
X268	LAGEEDNVISQIQRPVKEL	38630.9	43654.3	47713.7	41777.6	49250.7	39467.1	43706.7	55333	43627.7	49095.2	49212.4	48721.8	63417	49265.8	49274	154650	79891	104770
X269	LANRDDNED	18363.4	25863.5	25080.1	23189.9	41922.6	31118.7	51408.5	85707	3040000	49756.9	18655.7	44674	37368.5	50649.3	75474.6	63113.7	27354.6	27074.9
X270	LANRDDNEDL	1.3766e+06	4065600	4985900	4864200	1.50637e+06	1.50159e+06	4501800	1506700	12583000	1.49692e+06	922932	1.11401e+06	1.17104e+06	1.50083e+06	1.50021e+06	1.45574e+06	1.23284e+06	1.16491e+06
X271	LDALEPDNRIESEGG	152020	174180	147650	133570	98070.8	98213.7	98285	97942.9	88170.8	95534.1	95312	96916.2	96591.8	95980.7	93298.7	97708.9	95765.4	98187.9
X272	LDALEPDNRIESEGGLIET	19446.1	18329.1	20703.9	18432.8	21920.3	14130.6	17641.9	18026.2	16474.3	21931.4	155320	21989	21759.7	21942.2	21970.4	87215	121620	47851
X273	LEDQEQEPQH	1.31678e+06	3161700	2438500	1.32053e+06	1.32428e+06	2632500	2485100	1.12787e+06	1325300	1.24255e+06	1.1651e+06	1.24997e+06	1.27871e+06	1.19557e+06	1.18468e+06	1.31463e+06	928273	1.13525e+06
X274	LEEQENEPH	215823	1849900	3739100	2232200	218180	2858900	2572300	2059500	2922000	1397600	216843	1595800	2044400	1638600	1558700	2688400	2627800	1796900
X275	LEPDNRIESEGGL	1971200	3223100	1844100	3038900	3846000	169770	1700500	169138	169762	141764	169766	159809	112888	160648	166500	151925	157140	169341
X276	LFENLQNYR	204323	176416	187044	181935	241923	193285	199545	219062	226359	255482	223285	256577	256980	569160	501500	239490	256412	256013
X277	LGGNPETEFPETQEEQQGR	56912	54788	53946.4	54590	629850	40309.9	52911.4	50825	44130.2	54270.4	2964000	54632.3	51506.5	48857.9	54082.8	53720.8	53378.4	53991.1
X278	LHLPSFSPSP	26642.6	25092.3	28015.3	27973	31942.5	29934.4	26583.4	28010.3	29789	33361.4	33246.7	59376	33504	65529	33463.7	33464.3	32143.5	32921.4
X279	LIETWNPNN	773700	644270	573250	504660	309022	344750	484170	309587	303330	309116	304173	304187	280003	306097	298615	309374	307414	309660
X280	LLEDQEQEPQH	2157300	2195200	1498100	2949200	80968.1	3915200	2343400	2708700	2316300	558310	83405	701320	529930	908930	765830	316580	285920	84397
X281	LLSGTQNQPS	3315400	4214200	3787100	5157300	1812900	5351800	4600400	3655700	3139900	14348.2	1405500	14459	1334000	1526600	14392.7	14185.4	14053.3	14176.7
X282	LLSGTQNQPSFL	33836	26489	26377.1	33962	2321400	153710	54216	57133	26064.1	217630	1069700	302200	302760	276220	352050	263420	224760	370350
X283	LLSGTQNQPSFLSGFSK	84228.4	80172.6	88570.5	87608.3	88781.3	77189.2	85533.4	89040.8	75082	89107	232610	137920	150350	141400	125310	252800	275670	204960
X284	LNIGSSSSPDI	21175.1	43128.4	42510.2	2213800	184150	4075000	1724500	42878.5	2207600	42361.9	44281	57645	45046	42694.7	966930	29072.6	42837.5	22195.4
X285	LPQFTDADF	4120.81	4169.14	4257.4	4395.69	4379.76	4143.45	3974.9	7205.71	5219.51	42138	7957.46	9180.9	9146.18	11966	9138.38	9144.18	9155.02	14475
X286	LPSFSPSPQ	518123	456588	477596	478784	473027	489402	486213	396805	449290	517985	518760	1299600	518037	1069600	1165700	517340	894190	740440
X287	NGDDVKSACCDTCLCTR	31457.7	29659.4	30305	30821.9	35978.4	27435	28375.8	31213.4	29490.7	36125	98212	36104	33981.2	34918	33403.8	37408	53642	36113.9
X288	LSGTQNQPSFLSGFSK	7110.44	6022.22	7856.4	6991.46	11823.7	8645.38	6857.22	9596.41	9093.32	29553	82370	82188	11839.9	97531	12239.8	11938	11557.9	11852.6
X289	LSPGDVFVIP	106130	97453	7159.65	7194.14	6984.38	6998.05	5605.03	16751	7190.81	12014	12546	10228	12035	6851.25	7013.75	7086.36	4579.98	7255.1
X290	LSPGDVFVIPAGHPV	53411.1	40578.7	42291.9	48943.5	45108.5	44747.7	34451.7	790240	54207.6	1083700	54100	620620	517390	523640	700300	397690	402970	390200
X291	LSPGDVFVIPAGHPVA	22733.4	22673.1	20401.1	22739.5	14456.7	22240	22553.3	680790	331320	300540	22756	106280	82233	100210	112310	86606	78640	98981
X292	LSPGDVFVVPAGHPV	48933.5	45383.9	47532.5	49033.6	45817.3	47996.8	49076.8	49103.7	46107.9	199570	49111	135170	192210	147060	162790	118420	140360	96253
X293	LSPGDVFVVPAGHPVA	40584	37089.1	40377.6	40168.2	40579.2	40559	39943.1	273130	94272	229760	116070	286630	331680	402900	252280	303080	260870	248300
X294	LSPGDVFVVPAGHPVAI	83735.5	66947.3	79832.7	81739.7	74368.9	80921	62936.3	762400	83971.4	1437700	84567	1543200	1089200	1619700	1592200	878980	909190	709510
X295	LSPGDVLVIPA	156257	154920	156354	156312	198180	156224	144975	269220	167660	231850	242220	238640	270970	231410	226040	184850	171800	156370
X296	LSPGDVLVIPAGHPV	86608.7	83267.4	78069.6	86342.1	86291.6	87099.6	79404.2	87026	87222	715500	604040	573500	357210	522890	385150	248790	448670	458920
X297	LSPGDVLVIPAGHPVA	105310	79889	83713.2	83727.4	84551	84189.8	83983.8	1070100	363640	580780	804180	553350	488820	667800	646410	472240	460190	314170
X298	LSPGDVLVIPAGHPVAI	52284.6	43218	45877.7	51949.2	52293.7	50322.5	44171.9	239480	52303	1059000	926900	884660	798670	1028000	1017600	579200	720120	461560
X299	LSPGDVLVIPAGHPVAIN	21279.6	20801.3	21119.4	22776	25691.1	21522.1	24361.7	32376	24489	114520	443970	35479	32781	38405	50353	32020	25701	46564
X300	LSPGDVVIIPA	62794.5	55790.5	54550.1	63159.1	101450	62326.6	54868.4	93938	63221	413650	944980	169520	283140	139980	203560	106700	99861	185960
X301	LSPGDVVIIPAGHPV	103480	68009	63215.5	63004.8	118870	96804	51623.7	447070	65027	930500	1409600	2203700	2736200	62897.2	2649400	1920100	1994300	2255700
X302	LSPGDVVIIPAGHPVAI	449.133	338.442	366.952	355.589	542.97	437.956	406.294	570.2	917.385	940.162	574.527	951.997	702.568	6531.1	953.02	752.402	952.361	661.059
X303	LSPGDVVIIPAGHPVS	62587	15347.2	12138	15811.1	123010	42728	15977	16114.8	11719	148760	1018600	16346.7	298430	16105.2	391830	15463.7	16351	13572.8
X304	LSPGDVVIIPAGHPVSI	26068.6	23291.4	21302.6	26351.3	25905.9	24632.9	21840.1	148160	26408	544640	1710000	666920	535310	407960	625860	482820	584840	536270
X305	LSPGDVVIIPAGHPVSIS	31105.5	26913.6	33256.6	29479.5	33019.2	21840.7	32410	53219	32929.4	188800	508680	221280	33335	237420	73000	268350	250880	274520
X306	LSPGDVVIIPAGHPVSISA	7187.27	6953.82	6893.01	7314.4	9380.11	6824.42	6932.77	9358.63	7990.74	9424.2	19171	9386.5	9382.1	14386	9361.75	8787.98	9562	12275
X307	LSPGDVVIIPAGHPVSISAS	14252	13785.5	12954	17084.4	16920.5	12838.4	12805.8	13373.4	13040.6	17753	31194	20644	17057.5	19952	17112	17095	32529	38264
X308	LSPGDVVIIPAGHPVSISASSNL	141053	131963	141209	137045	141276	133798	139191	139391	138865	141410	152310	217800	166330	286940	259080	237650	256270	267590
X309	LSPGDVVIIPAGHPVSISASSNLN	9675.64	10418.2	11242.3	9955.19	11249.1	10021.1	10847.2	11016.7	10125.6	11264.1	11142.5	15330	10909.3	13979	12780	19540	11274	19196
X310	LTDTGSSNNQLDQMPR	373380	291610	300250	16533.8	114570	144240	178670	317110	218520	17028	313040	132050	15479.7	164240	16339.8	224810	203540	149680
X311	LTETWNPNHP	215226	214244	257980	216186	232930	194323	239921	257780	242371	327950	300060	297910	258070	323230	261780	1467200	1398400	894820
X312	LTETWNPNHPE	4284700	4090200	4138900	3382300	706780	3183300	2594000	3560000	4535600	2044900	217310	2117800	2927900	2567200	1628800	5219100	5286300	2975400
X313	LTETWNPNHPEL	696792	2823300	3303300	708888	3035400	3666300	4365300	917400	1393800	697881	692177	708770	1224300	673062	819290	707514	325919	482624
X314	LTFPGSAQE	8575800	5916700	6473700	136262	2440900	138204	144290	142888	119723	2353000	3009500	2253100	1933500	2117200	1655500	4964200	145590	2683100
X315	LTGSDDNVISQ	1250400	1297700	95428.8	96684.9	93796.1	430280	96331	93441	93763.4	76786	95743.7	90182.2	73315.8	70769.8	92502.9	94636.5	70262.4	94427
X316	LVDMVQLLVMNGASVLDMH	35232.5	30655.9	34985.6	32652.3	35269	34935.9	35196.6	35306	32262.6	177670	53452	231030	156390	214320	263890	147010	135080	129260
X317	LVNEGKGNLELVGF	10145	8435.63	10140.2	8998.19	10075.6	10094.3	9826.16	10117.4	8124.13	177990	10144.1	345790	209750	298580	231930	195550	114810	212520
X318	LVNEGKGNLELVGFKNEQQE	9578.71	9703.76	13857.9	5878.76	10873	14785.4	9275.44	16190.3	16060.6	188290	16669.6	219520	16386.9	251450	16995.3	89955	16689	16628.9
X319	LVNEGKGNLELVGFKNEQQEREDN	55208.8	49698.4	43895.1	44079.9	64709.2	62055.2	65294.1	65693.8	246060	65555.2	53992.8	65479.5	65723	286130	65219.6	57776.6	65383.7	41755.1
X320	LVNPDDEEDL	7226900	5540600	6400300	7081300	2971500	8.6695e+06	8139400	7435.86	26259	3713900	26069.7	4711500	26169.4	4125900	3956800	26038.6	2874900	2373300
X321	LVNPDDEEDLRVV	902467	865518	828818	932875	883604	936009	805057	963957	826180	1.01483e+06	931292	1125000	1472800	1.01204e+06	1013900	950909	985006	975107
X322	LVNPDDEEDLRVVD	180190	175740	123910	165210	638970	59649	76039	59629.4	47476.1	57340.1	59564.1	59067.3	58127.4	51961.1	57733.2	55580.2	53717.2	59217.5
X323	LVNPDDEEDLRVVDF	34093.6	33642.4	39086.3	35238.6	785880	26830.2	37636.2	39102.3	28059.2	117520	2835500	102660	39132	91632	40896	148820	53417	221030
X324	NAAWDPSNKE	33803.2	1106600	33866	1636200	33471.3	1595800	1484600	33771.3	1357800	28430.4	33818	24537.7	33291.5	20475.8	33781.7	33435.6	33469.5	19783
X325	NALEPDHRVESEA	1313800	857860	1325200	1349600	18470.8	558460	835290	18481	18466.1	15872.3	17375.6	18401	17937.5	13784.3	15004	14258.6	18450.5	13587.7
X326	NASSDLNLIGF	30514.2	29927.7	30225	29876.1	97065	30624.5	30252.7	30667	30266	50704	66523	59133	49645	56158	53315	34469	33389	40485
X327	NASSDLNLIGFGINAK	14340.7	11049.1	14378.1	11222.2	9893.86	14321	14150.3	14908	14700	200470	14792.2	55000	40406	60401	59683	66790	69320	14995.8
X328	NASSDLNLIGFGINAKNNQ	12518.6	11190.5	9471.71	12541.7	10478.1	10779.3	10477.7	9882.52	11059.5	12517.3	11788.3	12599	12407.8	12506.5	12569	12595.4	27814	19276
X329	NDDEGSEPRVPG	144643	1655800	1449800	990430	142165	144960	142510	215310	120106	103109	106373	113185	118961	120235	96033.8	144826	132024	143767
X330	NDDEGSEPRVPGQRE	425491	1690700	940700	426120	326069	408221	424099	296344	304147	288913	286298	273331	278837	272013	251424	309477	243219	287068
X331	NEDVIVKVSREQIEELSK	45832	44607.2	48326.5	43845.7	54014.1	46588.6	48744.2	53078.3	53753.6	53971.2	52301.3	54025	54022.9	79515	61365	78023	59635	53875
X332	NEDVIVKVSREQIEELSKNA	27088	14408.8	16809.9	15588	17378.6	12863.1	14817	13973	17340.1	651970	17394.2	722140	17411	852670	809350	94762	1330800	1511800
X333	NEDVIVKVSREQIEELSKNAK	164801	150231	132455	175542	155573	171955	122157	217509	136971	237997	176326	237728	602310	228441	238070	185475	213963	194576
X334	NEGGLLLPH	3555300	3780600	247270	225900	207529	245994	148558	243586	193598	502100	241594	433410	539570	248490	247963	594560	247347	643040
X335	NEGKGDFELVGQ	369013	346029	367487	352440	358759	385712	352737	389944	389655	734000	389801	619280	497430	522240	586160	411560	390090	394760
X336	NEGKGDFELVGQRNENQQEQ	44775.5	42437.3	46033.6	44049	48681.9	47742.7	45313.3	43870.7	45125.7	50309.7	50305.3	86111	50500	85770	66638	50388.4	50442.9	50414.6
X337	NFLAGEEDNV	754850	633090	568640	548420	104090	524510	482750	103268	635480	151380	83424.2	198000	142510	196660	136070	85151.8	102884	89625.7
X338	NFLAGEEDNVI	9598.17	6479.55	12615.9	7863.93	12402	12109.8	12369.4	8289.66	8573.78	12702.9	12724	187030	116920	148090	129140	88631	83737	12722.5
X339	NFLAGEEDNVISQ	1138900	971180	1003600	1101900	1485200	1173600	1218000	433772	444143	599110	1526600	496840	498920	569290	800340	485580	481060	447150
X340	NFLAGEEDNVISQI	80413.6	73823.9	74859.8	78227.9	683340	80484.9	80342.1	171240	88232	227250	1612000	196760	122300	193350	198880	89136	80630	84577
X341	NFLAGEEDNVISQIQRP	64185.2	57570.9	62287.9	66248.5	107932	56983.1	62490.7	87235.1	66036.7	158090	1437900	124484	111318	112028	119649	98623.8	116047	105597
X342	NFLAGEEDNVISQIQRPV	134340	105590	64168.8	61820.6	58060.3	64745.7	58223.9	550740	205050	846070	65387	908200	775190	778520	866200	696720	762320	481190
X343	NFLAGEEDNVISQIQRPVK	255776	176916	191405	232473	258113	181585	205126	373910	256631	2130600	13532000	1652400	486600	2780300	2167200	258720	1413700	1064100
X344	NFLAGEEDNVISQIQRPVKE	43267.5	36235.5	38858.7	38716.9	43359.6	30305.2	37977.9	165660	52333	186630	160650	142700	43449	179050	96478	143030	175260	154970
X345	NFLAGEEDNVISQIQRPVKEL	225354	189015	201493	216595	226007	215231	180883	1167300	226060	2254100	564260	1991300	1807200	2224800	2145900	1084200	1320800	1184300
X346	NFLTGSDDNVISQ	233900	67173.9	157570	153330	770830	122090	136260	65265.3	64265	139270	327180	118500	65184.6	113680	67085.3	67458	67204	120200
X347	NFLTGSDDNVISQIENPV	11973.9	10123.8	10331.5	11413	14494.6	12707.6	10277.5	14622	11946	41038	134810	33890	40970	17011	34611	14586.1	14606.4	14593.8
X348	NFLTGSDDNVISQIENPVK	8963.97	6569.71	7561.52	8958.72	20683.7	7407.3	7419.27	18827.4	10511.5	20599	1133000	33728	39415	21950	35260	20358.9	20483.8	17018.3
X349	NFLTGSDDNVISQIENPVKEL	89917.4	78593.7	81877.8	84378.9	89660.8	89745.8	84082.7	89935	81177.8	262800	559850	272890	302520	211100	340500	204040	216720	159760
X350	NGLHLPSFSPSP	388320	319110	71291.7	72812	313760	274090	72213.9	71665.2	160740	70801.9	72124.9	90076	177650	99151	143430	272630	289400	101710
X351	NGLHLPSFSPSPQ	1425700	938920	560860	771670	97948.9	731960	634500	662620	690920	99121	799380	192950	273060	197520	177080	275170	373480	188420
X352	NIGSSSSPDIYNP	94017	175930	230650	167000	113220	93985.6	100903	93525.8	80522.8	88635.1	92543.9	89140.3	91625.3	92969.5	82091.5	93730.6	88672.3	93957.3
X353	NILEAAFNTEY	9942.22	9973.65	9823.21	10150	10537.3	10017.2	9669.84	11260.6	10358.1	14861	11256	11307	14690	13463	11310	11059	11305	11128.9
X354	NILEAAFNTEYEEIEK	93346	90273.5	92865.2	83318.1	150160	77378.5	80865.3	277280	130080	106310	228790	181750	108410	124060	152470	104270	102880	93347
X355	NILEAAFNTEYEEIEKV	108040	40696	26764	3246.03	3291.9	3263.67	2275.6	228520	3186.38	1017100	42119	937740	936280	1104400	1193200	912000	842540	877600
X356	NILEAAFNTEYEEIEKVL	18911	16767.1	17798.4	18821.9	18904.1	18840.2	17782.6	18845.4	15274.1	207460	80369	318540	302300	319900	402010	118020	195350	231000
X357	NILEAAFNTEYEEIEKVLL	85515.9	83250.7	97749	95583.1	93815.9	99609.9	85281.9	89637.8	69720.6	100332	100870	358450	320210	100661	255030	164020	168940	188890
X358	NILEAAFNTEYEEIEKVLLEEQEQ	11268	10169.6	11259.6	10751.6	11077.5	11090.7	9921.24	11198.3	8901.63	50883	11243.3	122560	99272	47015	76622	67777	41049	53187
X359	NILEAAFNTEYEEIEKVLLEEQEQK	542287	485441	522854	517430	578729	576577	535588	562065	506742	578631	994370	1467400	1011700	1235300	1420500	579530	728360	724100
X360	NLERGDTIKLPAGT	3094300	2951600	2613000	1962600	1162200	1147800	22824	22758.8	21824.1	9408.48	22605.1	22628.6	11050.3	11773.2	7383.88	22390.5	17765.3	17477.3
X361	NLERGDTIKLPAGTI	8608.2	31158.5	1205900	1498300	376370	31138.3	1382200	31122.8	30475.8	752940	31251	521100	3227200	706190	260060	994260	1365400	532110
X362	NLERGDTIKLPAGTIA	292914	323756	345574	310560	349594	294754	278987	363282	315833	636960	365390	368513	1183500	367257	368560	2248300	1214500	1744100
X363	NLERGDTIKLPAGTIAYL	358701	384840	401178	446984	452377	341093	359505	451181	419484	1307400	1967500	1175600	512940	1080900	452680	827850	961960	2584800
X364	NLLGFGINAENNER	50366.4	37816.4	40071.6	50501.1	413170	48177.9	49921	49024.5	37981.1	51609.1	49654.3	76946	133130	76748	110320	50542.9	85993	50597
X365	NLLGFGINAENNERNFL	9275.43	9160.86	12169.4	8611.34	11270.3	9723.92	10398.8	9481.99	10304.8	13384	10977.2	33461	12278.2	12308.5	21769	27538	18912	12309
X366	NNPGQLESFLLSGTQNQPS	42817.6	45822.3	47544.9	44135.4	47454.2	43540.8	43711	69606	47567	86706	47534	56196	79276	68323	79701	92541	47534.7	85514
X367	NNPGQLESFLLSGTQNQPSFL	12457.5	11426.9	11670.9	11581.9	12246.4	12203.9	11908	13245.7	11784.3	20479	13279	13281	26268	14409	15685	29583	29014	13187.7
X368	NRPGEPQSFLLSGNQNQPS	31118	30006.6	30499.1	30178.4	32595.5	30498.3	30935.4	31670.4	31297.8	32837.2	31916.6	32882.3	32889	40343	41846	32325	32886.7	32853.7
X369	NRPGQLQSFLLSGTQNQPS	11475.7	8053.71	7143.49	9750.63	8975.47	8899.28	7859.31	7367.73	7059.61	11501.5	9702.94	12105	33445	11577.3	39989	11466.2	41749	11533
X370	NSFNLERGDTIKLPAGTI	97665.7	86862.6	92798.3	91227.6	139016	91640.5	96485.1	100277	86128.9	139745	102136	135257	139800	139295	371380	107402	109020	126826
X371	NTDYEEIEK	23905.6	3396600	5659800	5080300	2839200	9.4982e+06	5069800	23395.6	7928200	8814900	25900	31655	8126800	29694	9.3326e+06	23956.1	24399.6	30151
X372	NTDYEEIEKV	228540	298380	228146	225705	438960	149013	150954	1142600	227420	227249	227621	464390	458720	359310	226458	379120	307810	364660
X373	NTEYEEIEKV	492490	686690	488643	2368800	924540	2158000	3207500	396100	485043	491336	477714	831680	674430	636500	480846	466896	440615	427595
X374	NTEYEEIEKVLLEEQEQK	91636.2	90196.5	107641	93095.4	543920	104138	96771.4	98969.8	107836	277060	107850	441160	137730	352590	198610	163280	108920	324980
X375	NTEYEEIEKVLLEEQEQKS	10491.8	10110.6	9846.45	11992.8	12337	10494.4	9587.92	12044	15032.2	54268	31273	49159	15050.3	78255	15038.6	15057	34807	73890
X376	NTNYEEIEK	22025.4	39285	23186.9	115170	30038.4	1567900	114573	21734	34049.9	38839.4	24669.4	62638	62477.9	47020.7	56836.3	128130	46028.9	49042.5
X377	PHMPSSSSN	42648.2	30977.7	36771.4	43857.5	4727300	45315.3	44999.5	34401.1	22977.2	44738.8	45307.3	85141	45193.6	45433	65165	31576.4	25744.4	38607.1
X378	PSFSPSPQL	29119.7	32117	31383.1	31459.5	5233600	32156	48174	679150	1143100	27506.2	535020	31327.2	30188.3	31978.7	31785.2	32045.7	18531.4	24291.4
X379	QEEETSTQVQR	21459.1	20133.6	20019.9	20346.1	398730	18921.2	21416.9	20667.3	17806.2	21325.1	362090	21492	21066.7	18977	21399	21428.8	19289.7	18821.6
X380	QEEKEEEEEEK	39451	38226.9	44706.7	39489.1	40260.6	37219.7	36123.9	39858.1	34086.9	45125	44739.6	78482	118300	45232	46961	203490	203760	158360
X381	QTLYENENGHI	9.93513e+06	1.0141e+07	1.0125e+07	1.01037e+07	1.03414e+07	1.02106e+07	1.05041e+07	10706000	12794000	1.04343e+07	9.94312e+06	1.03802e+07	1.03061e+07	1.04592e+07	1.06635e+07	1.05483e+07	1.01488e+07	1.01285e+07
X382	QTLYENENGHIR	69270.4	41408.9	40035.6	51277.4	56460.7	39048.1	33081.1	68513.5	55667.6	515420	4910100	113500	71120.9	149210	71141	70258.3	1013300	71064.9
X383	QVEEQTEEKD	254060	1305900	1405100	253963	253692	254590	831160	1638100	1467800	246939	243868	251563	179234	236603	252523	254152	170778	204310
X384	QWRPSHGKEEDEEEKEQ	31077.4	39942	43320.2	37376.2	67426.5	32953.9	37533.5	55273.9	36882.9	73999.5	67751.9	73965.2	71422.9	73111.9	64325.2	223930	74148	395770
X385	REESDEEEEQEEE	156659	352360	354750	181911	145958	150440	157150	150502	143045	130667	126893	128611	130424	129532	121400	143674	127066	137691
X386	SACCDTCLCTR	42042.6	36420.7	64210.7	31132.6	46913.1	31229	41615.7	39837.4	38216.5	63681.9	63032.3	381730	64050.5	63630.8	64283	1841900	1145200	616820
X387	RPSHGKEEDEEEKEQ	6445.19	5718.07	5500.4	5869.94	5067.88	4907.72	6182.87	6725.56	6393.19	15496	6729.82	7766.8	10128	6741.6	17319	35855	60341	29748
X388	RQQSQEENVIVK	53005.9	57152.1	50698.3	60840.3	774490	64476.3	59802.8	64786	60057.5	140280	65480	65448.7	187490	65355.2	70159.4	64958.8	65446.9	47841.7
X389	RSDQENPFIFKSNRFQTLY	311243	282027	299396	312537	313459	312369	293267	312528	301916	1036800	313520	517570	1015400	1381900	694010	762840	1165300	929240
X390	RSDQENPFIFKSNRFQTLYE	94178	82462.4	85151.8	98207.4	98165.4	74850.6	81737.2	98302	83111.6	98309	150750	136470	141220	246320	138000	292230	575770	553530
X391	SATTGAEFAAHEVHSWSF	5788.95	4107.27	4891.84	4264.59	6034.09	4775.48	6553.29	6364.85	5259.54	16160	16139.3	12733	16481	15647.7	16176.7	382180	417810	16374.4
X392	SDLFENLQN	91700	73731	95516	44969	723820	59473	42129	38693.5	39345.2	175610	40827	159310	40750	40681	40055.5	147980	113230	241650
X393	SDLFENLQNY	30165.1	23451.2	27921.3	28441.4	314830	30693.6	31336.9	27674.8	21316.4	31062.6	31480	98702	31347.9	77947	86875	31090.9	25583.4	43968
X394	SDQDNPFIFES	43838.4	47244.9	49353.2	48174	50594.1	50565.9	48310.6	50690	74870	91753	50624	116660	50600.4	118710	50673.8	50483.4	50650.9	88988
X395	SDQDNPFIFESK	189970	127230	153760	138430	962420	308450	170660	17842.2	14489.8	17491.5	36004	1417400	1708900	1543600	1483900	16787	17788.1	17989
X396	SDQENPFIF	18797.1	16135.6	17635.9	18111.8	375840	20444.8	19483.1	20266.1	16117.7	41220	63717	52938	35412	26660.3	43226	20421.9	18705.9	20587
X397	SDQENPFIFK	176627	171488	179308	177324	208315	173803	176319	202453	182028	208134	380810	246430	208360	264990	207600	207703	207434	206834
X398	SFLLSGTQNQPSFL	12482.5	12223.1	13057.4	12210.1	13040.2	13168	12691.4	12700.9	12954.3	18030	13987.7	21836	13999.1	18139	17528	13931.6	14001	13962.3
X399	SFNTGYEEIE	717390	654530	532720	536250	274958	560970	267050	266920	227958	266260	255989	266544	256905	253208	243366	265502	266163	262387
X400	SFNTGYEEIEK	9.6362e+06	7490900	9.7783e+06	8139300	1102600	878740	8266700	7647700	8284100	882760	1611000	853557	2213900	2983300	2733100	3988400	2906700	4590000
X401	SFNTGYEEIEKV	1043800	959120	1213900	2126500	158260	1745200	2436500	45475.5	44211.7	1888600	45754	1315700	1845500	43399.7	1630800	826830	655080	809880
X402	SGFSKNILEAAFNTEYEEIEKV	42887.7	39071.7	43756.2	38926.7	43791.8	39829.3	42291.5	37911.1	41248.2	56291	43769.9	105170	43794	83763	92244	73630	89475	86941
X403	SILEAAFNTDYEEIEK	66434.2	66378	65295.3	64177.4	284650	58145.6	66184.7	190450	132820	83457	392160	88641	68475	84297	104080	112210	66542	82384
X404	SILEAAFNTDYEEIEKV	171530	165773	169347	171385	171094	160688	152629	619640	235260	503400	171479	419500	455820	413200	516930	541920	473710	592790
X405	SILEAAFNTDYEEIEKVL	23751	6454.6	6454.43	5183.4	6279.73	6443.43	3910.03	6413.77	3662.85	299830	70425	371810	418370	396930	501390	488000	306130	399130
X406	SILEAAFNTDYEEIEKVLL	54773	46238.5	54638.2	51457.4	54748.2	54612.6	50799.7	54515.4	45333.6	139150	142680	434870	305040	353430	367290	173150	194730	209910
X407	SILEAAFNTDYEEIEKVLLEDQEQE	1911.09	1367.82	1231.87	1753.97	1788.47	1431.44	1407.3	1495	1620.97	1905.67	1731.56	1911.4	1906.21	4807.2	5310.1	1907.92	6492.7	3449.7
X408	SKIFENLQN	33783	28925	1122100	32472.9	32872.3	33086.2	1039900	33189.7	33210.1	33632.6	23953.4	657590	521350	844230	33672.9	1090900	855850	1423600
X409	SKIFENLQNY	616168	629661	644514	617020	603768	625579	650053	784641	667952	1461100	748205	785070	783274	784149	784676	1020300	836490	784636
X410	SKIFENLQNYRLL	13813.6	12729.3	12838.5	13431.4	15305.6	11863.9	11788	14685.7	13290.2	21379	50856	17199	17551	15348	15249.2	15323.1	25882	16235
X411	SKIFENLQNYRLLEYK	27576.1	26477.9	28413.1	26190.7	30554.3	30577.5	26098.8	29009.4	30707.2	72958	55609	76633	30667	76044	30625.5	30638.3	29554	30712
X412	SKPHTIFLPQFTDADF	23012.9	23248.1	24023.3	24387.6	25085.3	21985	20154.8	25140.9	21223.4	69996	30204	34368	61656	34610	46823	36392	25123	31719
X413	SKPHTIFLPQFTDADFILVVLSGK	9406.79	9487.17	9448.44	9670.32	9969.76	10146.9	8615.5	10164	9538.26	23209	15065	20108	25630	17719	10172	10151.9	10178.1	10092.4
X414	SKPHTIFLPQQTDADFILVVLSGK	11992.4	11787	13174	14723.3	15124.5	15820.5	11628.2	12860.1	11641.8	16281.9	13184.9	35026	30076	21900	16210	16204.2	16083	16193.7
X415	SLNTKYDTIEKVLL	119565	118538	118649	118876	123548	118722	118683	123044	121273	129640	123929	124840	126098	141350	134290	124041	124832	132010
X416	SLNTKYDTIEKVLLEEQENEPH	185516	152330	152193	156252	163771	160064	157426	181993	185340	199160	185466	209010	185624	412530	185540	236040	336480	219280
X417	SLNTKYDTIEKVLLEEQENEPHQ	35572.9	20310.9	22526.7	23614.3	23242.2	27614.1	23988.4	15546	25012.9	35789	31775	222800	35755.7	180700	147590	35757.1	265200	35630.8
X418	SLPSEFEPF	1493400	1068500	1105800	1500100	1121.71	2012800	1413500	1445400	1771000	1134.75	1138.61	958950	1131.06	1143.2	799260	1125.83	1052.75	1102.65
X419	SLTDTGSSNNQLDQM	175390	95364	75706	73478.8	75742	72844.2	62195.2	75602.3	59661.4	68719.1	74951.6	68038.3	75693.5	63789.1	65531.1	74815.7	71049.5	64964.4
X420	SLTDTGSSNNQLDQMP	27519.5	27610.2	23880.6	22038.8	27802.1	23793.5	26172.5	194840	163290	27670	51340	44858	25781.4	27803	27719.2	27682.5	25574.1	25685.8
X421	SNKFLTLFENENGHIR	87262.6	95577.2	100699	92550.7	117017	87671.5	88322.4	117227	84530.6	142310	135810	117250	283310	133300	159330	332340	171620	295050
X422	SNRFQTLYENENGHI	55493	46132.4	49047.3	54473.1	51577.7	51857.7	49397.4	247150	270160	673370	52533.9	591870	731330	1341400	2459400	55298.6	162290	342960
X423	SNRFQTLYENENGHIR	387362	354096	376388	363292	382586	395708	367363	452018	416804	1076200	452670	728840	539820	772310	804100	450689	452118	450301
X424	SNRFQTLYENENGHIRLL	16726.9	16353	17958.8	16478.7	17595.6	17603	17018.2	16870	16971.4	22152	18576	37236	22172.9	22179	28258	22124.5	21942.1	22138.7
X425	SPGDVLVIPAGHPVAI	3765.51	3466.28	3685.5	3846.46	6079.08	3418.53	3798.22	5499.04	4332.52	6102.56	42444	6104.1	5452.08	8732.7	5968.44	5279.26	6073.26	6085.35
X426	SRNPIYSNKFGKF	21808.6	19964.4	18837.8	21827.2	21886.9	16382.2	21890	21847.6	11055.1	21752.8	16394.2	21838.1	507220	21630.8	602670	292290	352850	385710
X427	SRQEEDEDEDEKEE	11239000	702000	769000	574720	117689	346990	117540	117910	36580	111752	85120.6	115375	117899	89744.3	83455.6	874430	508850	117253
X428	SRSDQDNPFIFES	13392	9293.08	10253.4	10942.2	16259.6	16197.3	8973.8	16203.7	7113.29	16279	16239.9	184910	283190	243710	321020	13734.3	16291	16199.3
X429	SRSDQDNPFIFESK	55883.2	47367.5	42421.6	61431	59607.2	31799.4	36749.3	2004200	60091	61301.5	2216200	271350	1205400	1737200	461340	416750	375860	475890
X430	SRSDQDNPFIFESKR	13599.7	17045.1	19246.4	15645.8	22899.6	14488.7	17001.1	24852.1	16054.3	27729.4	23880	27955.5	27112.8	27319.5	25503.3	93251	27875	98432
X431	SRSDQENPFIFKSNRFQTLY	62162.2	56661.1	54723.6	56482	58356.6	57412.1	55458.3	61558.8	62710.9	80595	63130	63393.2	63245.6	97367	63358.6	63207.3	79462	63435
X432	SVEIKEGSLLLPN	156090	142910	101640	85870	32060	75003	68364	31913.5	31649.1	31993.6	23933.5	31927.3	194780	31469.8	148010	31234.7	31740.4	31483.4
X433	SVEIKEGSLLLPNYNS	87655	27787.6	26268.3	28161.3	109130	28155.8	28124.5	571870	132060	283330	28208	599830	505100	647670	1132800	221570	403100	489210
X434	SVEINEGGLLLPH	2501600	1632900	671410	998830	178527	1170100	421620	1227500	707430	1434500	181240	1355800	2446000	1606200	1138400	1567700	1377500	2156900
X435	SVEINEGGLLLPHY	5866.24	5625.96	6335.13	6433.85	9517.75	5273.91	6406.25	7297.89	5547.19	9502.1	107440	9447.8	7805.01	9313.01	9384.53	8049.18	9497.65	10460
X436	SVEINEGGLLLPHYN	8469.94	7709.8	8271.62	8234.66	11774	7969.37	8831.23	9845.53	8875.42	11890.6	60558	17041	11079	11884.8	11909	10564.3	11509.2	10297.3
X437	SVEINEGGLLLPHYNS	63857	55049.2	63745.2	63331.1	63630.9	63623.3	58815.1	281070	99424	371960	63817.5	646750	580630	663850	747830	493140	694650	622550
X438	SVLEASLNTKYDTIEK	69286.9	61172.6	69754.6	64263.1	368490	65500.4	69897.7	69889.6	64708.5	133900	70105	83239	69866.4	168660	156820	93934	86678	101510
X439	SVLEASLNTKYDTIEKV	34912	24227.9	22241.6	23181.9	23123.9	23175	19507.9	23182.7	18871.3	23190.1	22873.1	23207.9	31326	21971.5	23258	23015	22930.7	21822.9
X440	SVLEASLNTKYDTIEKVL	79191.6	69520.9	72395.5	75097.3	69069.9	75526.8	78714.3	90457.6	80214.1	498010	90269.1	112010	151740	153530	251150	146520	169020	90477
X441	SVLEASLNTKYDTIEKVLL	76059.2	78926	86270.8	78120.2	86307	80980.1	84071.5	80297.3	80443	95434	86325.2	138180	87896	132460	117000	122950	86386	126140
X442	SVSSESEPF	1845400	1170200	36510.1	1554200	38916.8	39228	2017200	38328.3	33462.4	522170	940440	630990	36409.6	930230	764310	30172.2	38743.4	38694.4
X443	SVSSESEPFNL	164400	216190	222650	309320	74782	1170000	247900	188620	363340	9850.73	10912	10793.1	10700.3	90914	164700	10177	10113.7	6631.75
X444	SVSSESEPFNLR	274730	305410	472770	950750	1197900	1082800	330570	217867	220900	222052	222490	1117800	545780	829140	221512	402450	221561	222237
X445	SVSSESEPFNLRS	404040	283800	559980	46387.7	32011.5	32740	968480	32607.6	142110	31353.5	23164.1	20262.4	9200.12	32673	31924	32657.2	31478	32512.5
X446	TDTGSSNNQLDQM	800740	567120	288460	185940	2366900	462400	416060	184683	444660	183930	1566900	185734	181711	180630	183617	185023	173002	152866
X447	TETTSFSITKFSPDQKNLIFQGDGY	451760	470861	485208	439523	497057	368649	400691	495846	470238	1978700	1150500	566880	1086000	499070	558530	5463700	4314900	4229900
X448	TETWNPNHPE	129520	40087000	3.573e+07	40251000	128529	4.2613e+07	30650000	1011800	4.2887e+07	15728000	8655200	37945000	15980000	37877000	3.3119e+07	45974000	51939000	5.8295e+07
X449	TEYEEIEKV	61421.4	63511	64619.1	63864.1	81238	64910.5	65144	1000900	668960	1056500	113760	533320	577950	485330	506370	201480	137700	286250
X450	TEYEEIEKVLLEEQEQK	63372.3	50429.8	50318	59903.8	63041.1	57163.5	50568	53039.6	62892.4	294280	89856	363890	114980	365440	207640	63417	257500	333330
X451	TFFIAPVDTKPQTGGGY	116490	58512	17414.4	16792.4	113560	17417	14983.4	16857.4	13040.2	497350	647980	769950	1445600	685630	1301600	2938100	2341300	1864000
X452	TGGTVITDDLGLELK	30562.5	26232.7	27907.2	27267.1	27923.4	26819	28120.3	28158.6	24187.6	30726.8	30728	30556.2	86708	29191.7	54105	87463	105910	30711.5
X453	TGSDDNVISQIENPV	16532	22659	16139.4	16165.1	26481	28157	101280	8485.79	15828.3	155660	16336.2	97684	151180	143810	261960	61867	85089	122370
X454	TGSDDNVISQIENPVK	15787.7	14901.3	14816.6	14916.4	818050	17057	16605.8	16200.1	14658.3	72450	6353000	60300	93311	71483	48574	95713	100610	17035.6
X455	TGSDDNVISQIENPVKE	11115.8	10195.4	10322.5	10914.4	106560	10827.4	11079.5	11007.8	9389.64	21505	300660	11258	10864.6	11255.7	12642.3	11223.9	11149.6	11016.3
X456	TGSDDNVISQIENPVKEL	283876	262390	277187	283727	730050	281798	262262	819880	284010	608790	1553900	602620	640380	714410	701630	395110	366120	465770
X457	TIFLPQFTDADF	9565.4	9544.95	9531.91	9180.5	9555.45	9558.56	8692.67	9523.11	7579.45	60462	35834	31874	112420	36643	29395	102540	60849	67181
X458	TIFLPQQTDADFI	11582.7	12451.6	12843.5	12342.1	14906.2	12451.8	11485.9	14993.5	11956.7	19735	24809	15012	41410	14878.5	15007.3	56456	28774	20614
X459	TIFLPQQTDADFILV	14327	15907.1	19180.4	15364.3	20354.8	14642.5	14078.5	21775.3	14881.1	25543	23138	23133.4	89307	23002.2	23083.6	184220	76191	105110
X460	TLFENENGHIR	67425.5	70012.4	71050.7	74946	101824	66347.5	69315.9	83558.4	71029.6	175870	840790	101351	101830	95916.1	101631	93144.5	101732	96386.5
X461	TLFLPQYTDADFI	1758.04	2197.33	3277.77	1892.01	3382.44	2347.81	2180.66	4691.65	2381.17	9163.5	4767.01	4784.5	22036	4718.17	4805.9	40403	4768.21	4686.61
X462	TLFLPQYTDADFILV	1280.87	1237.41	1093.81	1693.7	1407.38	1602.36	936.512	2113.93	1217.94	9947.3	2269.16	3588	19691	2275.8	2709.4	2262.24	2269.42	2239.54
X463	TLNEVVPLKDVVPEWVRIGF	2547.8	3820.94	5167.67	2948.91	5852.79	3493.55	4569.29	6755.64	4064.58	31790	6812.3	28682	6645.35	22952	14437	103790	6812.06	92281
X464	TVLSPNDRNSYN	66886.9	541160	179950	65975.5	49882.3	59005.5	66917	36701.6	42262.4	39266	42624.5	33790.4	37491.1	34399.1	30906.3	41353.2	30043.2	38181.9
X465	TVNEGKGDFELVGQ	1152700	1045900	1171100	717730	712418	1164500	719572	1354600	720250	715049	717086	1187500	893750	910660	980510	719816	643711	719902
X466	TVNEGKGDFELVGQRNENQQEQ	99624.1	90042.5	93322.3	91955.2	110523	92313	96129.2	105425	98677.3	179310	109085	126594	126350	168520	273620	114969	120907	131710
X467	VESEAGLTETWNPNHPEL	15057.7	14933.1	15185.1	15328	18717	24371	46528	11162.6	15139.5	15285.5	134510	15321.1	10585.1	15302.9	15247.8	13094.5	12525.7	13735.9
X468	VFEDNDFET	1.25991e+06	1.28647e+06	1.52931e+06	1.07309e+06	1.54527e+06	1.49577e+06	1.49798e+06	1.548e+06	1.51572e+06	2632600	1.50327e+06	2985300	1552300	2393300	2121100	3602500	1.54962e+06	1.55085e+06
X469	VFEDNDFETK	314310	227720	291590	358690	611340	192070	516840	156085	171682	191425	7350100	191915	145789	180452	191897	142714	188357	189943
X470	VFEDNDFETKIDT	3247400	1276700	780620	1221500	56591	208930	1106100	1593200	355270	45940.9	56043.3	55046.4	39217.5	55018.9	56425.3	54459.2	55962.9	55029.4
X471	VLDLAIPVNRPGQL	19725.7	20455	22611.9	23371.6	46299.7	19053.4	18782.1	45721.6	27846.6	291730	10321000	81209	136560	57024	69154	82314	63338	46207
X472	VLDLAIPVNRPGQLQSF	15318.2	14415.7	14340.8	15796.4	18602.2	15459.7	14212.8	18613	15571.5	38879	93620	27891	37275	31944	26339	18631	22303	18501.3
X473	VLDLAIPVNRPGQLQSFL	14954.5	13401.6	13840	14832.9	16124.5	16027.6	13178.5	15730.3	14383.6	38041	26075	30969	42431	17940.9	37663	16212	16237.1	16245
X474	VLLEEQENEPH	19701.9	14110.1	22187.3	15203.1	25679	23319.8	22358.7	14444.3	16038.8	25830.6	24501.4	350780	25656.9	282840	410760	26058	25624.2	26004.5
X475	VLLEEQENEPHQ	364760	340280	449100	679820	198880	582500	483520	529850	711390	33830.9	33979	33741.4	30074.5	33819.6	33858.2	33720.6	33976.1	32093.4
X476	VNEGKGDFE	277585	651812	471334	2556100	470183	472160	2014900	351950	334436	376043	469538	387063	355191	376700	355214	251797	273057	319907
X477	VNGVAPGPI	36872.4	36635.4	43892.1	34590	41638	35530.3	40079.6	44148	43499.8	71633	44062.7	98951	43928.7	67539	58964	263850	224190	217310
X478	VNGVAPGPIWTPL	430510	415020	391570	354760	7797.84	267080	275270	222340	8094.12	19774	33729	23564	25485	13696	8185.1	21244	41223	26077
X479	VNPDDEEDL	103313	102681	131761	99059.9	226490	131458	121006	132215	118399	276850	132320	435850	311120	346900	297340	297340	131993	132129
X480	VNSVEIKEGSLLLPHYNS	34013.3	32686	33340.5	33268.1	37479.3	33180.8	33720.3	34097	32524.4	37867.9	34410.6	37362.5	37876	37873	50379	34654.3	35090.6	36495.3
X481	VNSVEIKEGSLLLPN	61663.1	65100.3	85672.6	67737.3	85681.5	67348.4	75325.4	85757.3	72632.7	85813.5	84791.3	95982	144030	137220	85823	153350	90736.9	112970
X482	VNSVEIKEGSLLLPNYN	21119.8	19027	19917	21739.8	25984.2	23650.4	21759.9	25555.2	21423.7	53898	225900	51018	53071	45992	78543	26016	26426.9	37550
X483	VNSVEIKEGSLLLPNYNS	128110	46377	46192	45608.5	328660	108740	44733.8	462950	223720	773290	162730	36372.3	701720	41937.6	46098.6	362470	551180	45554.8
X484	VNSVEIKEGSLLLPNYNSR	120342	111597	114245	119174	251690	119401	123777	119330	105172	123608	124059	123853	124170	127085	241000	117642	113982	123947
X485	VSREQIEELSKNA	76510.3	86755.4	87205.4	80737.1	88712.8	81624.7	88751.3	181680	251430	100120	88517	88757.7	88685.6	85104.3	88163	131500	88841	109500
X486	VSSVEINEGGLLLPH	23547.8	21233	23819.8	23568.2	24068	24040	21685.5	24061.3	16678.3	342700	499010	521930	815150	563590	532620	461500	281080	447550
X487	VSSVEINEGGLLLPHYNS	61658.9	55867	60815.2	61768.9	62359.9	62094	61880.8	62915	62466	102110	179390	167930	122410	162090	207140	94401	106450	139760
X488	VSSVEINEGGLLLPHYNSR	67842.3	60066.1	55683.2	69648	76450.5	59759.5	55184.2	76171.8	65736.1	76198.4	102870	78116	117820	156950	82647	76469	138850	141270
X489	VTSYTLNEVVPLKDVVPEWVR	5977.27	5863.11	4590.54	8595.43	7328.95	5124.17	4332.32	5485.3	4992.16	7731.62	8119.64	8660.71	17041	8749.8	7756.18	8965.37	32466	58202
X490	VTSYTLNEVVPLKDVVPEWVRIGF	508680	247360	432620	159730	61933	66365	70404	5776.9	20970	1861000	1022600	1258400	1589100	882620	888100	12482000	11747000	12194000
X491	VVEEEEGEWRGSQ	481710	455850	376570	424780	86499	86469.8	345170	278850	85928.6	77705.5	86242.7	74064	69048	77383.8	74976.5	77203.7	79732.8	84998.3
X492	WMYNDQDTPVIA	652000	272870	11148.4	11011.7	728660	10425.7	9721.18	401580	247770	6242.47	10976.7	11244	10185.1	6482.79	10610.8	10985.7	35121	11228.9
X493	YLGGNPETEFPET	227627	225442	237606	222973	211215	212252	201912	229886	220170	346370	238005	342150	384250	301310	238080	735830	828080	827870
X494	YLVNPDDEED	769120	596210	250079	438200	250700	524450	488480	233213	484780	327560	247019	416410	245298	244973	380420	247825	955490	739960
X495	YLVNPDDEEDL	406991	414689	431967	433790	407346	434166	403475	434307	413777	1046600	434460	1055500	977350	666000	715860	793460	836710	978160
X496	YLVNPDDEEDLRV	52141.5	63578	72968	132000	63534.2	74373.4	136220	59778.6	58585.8	61831.3	63511.8	63560.4	60241.4	63235.2	60732.5	52771.1	53789	58040.1
X497	YLVNPDDEEDLRVV	590380	422640	229650	720640	364200	741640	232740	375360	219000	639140	653400	519640	1719000	416820	299510	500900	558720	618760
X498	YNAAWDPSNKER	130400	109788	111273	231280	1814100	111590	169090	111005	82662.3	92932.4	111521	109714	108425	96776	110742	73356.5	71679	84330
X499	YQHEGKEEET	312338	1420700	311796	1997000	312913	2124700	312325	303260	310245	333090	277329	314110	811690	313077	350330	777200	679910	536660
X500	YQHEGKEEETSSE	310570	335350	164310	369410	163773	164271	274140	163674	136703	154413	164248	158210	129506	163115	164270	126082	135809	142604
X501	YQHEGKEEETSSESQER	1328400	696730	613870	769490	339210	538260	672850	13642.7	130350	13325.3	13704	13685.3	13658.7	12124.1	12210.9	12934.5	13657.2	13690.4

## Sheet: log2
	sequence	lfq_intensity_a4	lfq_intensity_a5	lfq_intensity_a6	lfq_intensity_b1	lfq_intensity_b2	lfq_intensity_b3	lfq_intensity_b4	lfq_intensity_b5	lfq_intensity_b6	lfq_intensity_g1	lfq_intensity_g2	lfq_intensity_g3	lfq_intensity_k1	lfq_intensity_k2	lfq_intensity_k3	lfq_intensity_p1	lfq_intensity_p2	lfq_intensity_p3
X1	ALGDTTNGCISTGPH	15.6219	15.4203	15.5149	15.4488	15.6529	15.499	15.6834	15.6788	15.5616	16.2216	16.2101	16.0467	16.2216	16.1566	16.2199	18.0227	18.0737	16.2233
X2	DDVKSACCDTCLCTR	13.736	13.6923	13.7321	13.7583	14.2579	13.804	13.5567	14.1602	13.8633	16.0661	17.9316	16.0359	15.5008	14.259	14.2621	14.2617	14.2477	14.2242
X3	DTHKFCYKACHNSE	17.5562	17.4775	17.48	17.4896	17.1904	17.3346	17.6026	17.5978	17.5726	19.0445	17.6046	17.5998	17.6056	17.6012	17.6027	19.1423	19.3539	18.2136
X4	ESCHSACDKCVCAY	14.5072	14.358	14.445	14.5233	15.132	14.3113	14.4367	14.7949	14.4852	15.3652	18.226	15.2671	15.0774	15.1249	15.1634	14.9849	15.3559	15.0597
X5	GDDVKSACCDTCLCT	15.0656	14.2321	15.0878	14.2291	15.0781	15.0998	14.6249	14.8914	14.7338	15.1129	15.1095	20.6069	19.6998	19.79	19.3047	24.0514	23.3958	22.6669
X6	GDDVKSACCDTCLCTR	19.4254	19.4184	19.3543	19.5612	19.5751	18.8447	19.1933	19.5659	19.4242	20.6777	22.632	19.6695	20.6639	20.7706	19.5782	23.1033	24.2461	23.3155
X7	AAVDTLPPVVNESEEPT	14.7332	14.8012	14.7616	14.8927	14.7588	14.8027	14.6799	14.9609	14.8398	15.9635	14.961	15.3371	15.6801	14.9619	14.9581	15.2463	15.3774	15.8162
X8	AAVDTLPPVVNESEEPTAKP	13.7696	13.6785	13.9006	13.8893	13.9044	13.8977	14.4339	13.7954	13.7486	13.9091	15.4197	15.4062	15.794	15.2654	14.7498	16.3991	16.3822	13.9074
X9	AFNTDYEEIE	17.7151	17.5102	16.8521	16.6754	16.8556	18.2987	16.8552	16.8566	18.4076	17.54	16.8517	18.2827	17.787	17.9522	17.6749	18.9363	18.734	18.4206
X10	AFNTDYEEIEK	22.5799	22.4582	23.0451	23.1865	18.4627	23.2988	23.0695	23.1954	23.1181	13.8041	13.6843	22.7529	22.3914	22.4676	21.7862	13.8116	13.7828	13.709
X11	AFNTDYEEIEKV	20.0336	19.9936	20.2827	21.4673	17.8374	21.162	21.6901	12.7426	14.3507	21.1343	14.5326	14.5325	20.8908	19.7989	20.9818	19.2879	19.6355	19.5378
X12	AFNTDYEEIEKVL	15.1831	15.1215	15.2039	15.1967	15.2042	15.1772	15.0957	16.0673	15.2103	16.4747	15.2053	16.2039	16.175	16.1816	16.3941	16.1282	15.7171	16.4643
X13	AFNTDYEEIEKVLL	13.7865	13.6417	13.7966	13.7491	13.8041	13.8037	13.8078	13.8108	13.9293	16.4748	13.8	16.6792	16.8207	17.0053	17.0871	16.4281	16.2012	16.3301
X14	AFNTDYEEIEKVLLEDQEQEPQ	14.986	14.8863	14.8809	15.0978	15.1492	14.9612	14.967	15.0183	14.9539	16.303	15.1719	15.268	16.0151	15.2857	16.7244	15.172	15.4882	15.3518
X15	AFNTEYEEIE	15.3787	15.3211	15.4757	15.1027	15.3299	15.2894	15.49	14.9925	15.3946	17.0778	15.4819	17.6621	15.4872	15.4756	15.4749	18.7238	18.6911	18.1112
X16	AFNTEYEEIEK	23.7194	23.8008	24.2233	17.7977	20.6899	24.3852	24.2484	24.2584	23.9255	23.7182	20.9951	23.0622	22.533	22.54	22.3536	23.3104	15.0311	15.0926
X17	AFNTEYEEIEKV	21.4497	21.1275	21.2763	22.4586	18.3678	22.178	22.5322	21.0701	20.8668	21.6339	16.826	20.933	20.9406	20.6005	21.4146	19.651	19.5228	20.0103
X18	AFNTEYEEIEKVL	16.5923	16.4429	16.4566	16.5878	16.6047	16.5759	16.5247	17.5956	16.7918	17.8302	16.5904	17.1101	17.4824	17.506	18.0534	16.6436	16.6102	16.9846
X19	AFNTEYEEIEKVLL	15.0253	14.7956	14.9307	14.9277	14.9336	14.9257	14.9126	14.9328	14.7753	17.7151	14.932	17.9532	17.6094	17.3676	18.2173	17.0507	17.1875	17.111
X20	AFNTEYEEIEKVLLEEQEQ	13.7843	13.6309	13.8797	13.7036	13.9246	13.9288	13.8672	13.6226	13.7075	14.0749	14.0399	15.7504	14.075	15.4315	15.3522	14.0332	14.0727	14.0757
X21	AFNTEYEEIEKVLLEEQEQK	16.8704	16.602	16.541	16.792	16.6721	16.7524	16.5809	16.6807	16.8671	18.1021	16.8709	18.2022	17.9728	17.7362	18.1968	16.872	18.2249	17.6362
X22	AFNTEYEEIEKVLLEEQEQKS	14.2823	14.0661	13.8672	14.2723	14.1081	14.1481	13.7998	14.8712	14.2754	14.627	14.2809	14.2827	15.6931	15.0888	14.2805	14.2825	15.296	14.4837
X23	AFPGSAQEVDRLLENQ	14.5365	14.4778	14.6436	14.498	14.7706	14.5529	14.7356	14.7695	14.7044	15.1874	14.7721	14.7733	14.9799	15.2178	15.3644	16.4853	15.8371	15.2828
X24	AFPGSAQEVDRLLENQK	12.6701	12.6835	13.052	12.7269	12.874	12.5301	12.8849	13.0803	12.8957	13.244	13.2525	13.2498	13.2451	13.2492	13.2415	16.0447	15.8718	15.1819
X25	AFPGSAQEVDRLLENQKQS	14.6116	14.6863	14.9938	14.6167	15.178	14.644	14.9029	15.1982	14.9652	15.1828	15.1934	15.2108	15.2067	15.968	15.2445	17.4296	16.3085	16.4441
X26	AGEEDNVISQIQRP	15.6809	15.5877	15.7356	15.7482	15.7359	20.1488	18.18	15.7537	17.2134	16.7073	19.4604	20.3536	18.2958	18.773	19.0007	15.7288	15.7364	16.0117
X27	AGEEDNVISQIQRPV	18.7368	18.7857	18.9642	19.6727	18.3483	20.3409	20.3885	19.3382	19.2922	20.7516	18.0876	20.5358	20.8169	20.3076	21.0312	19.9334	19.6477	19.7453
X28	AGEEDNVISQIQRPVK	14.321	14.3511	14.2962	14.3429	20.0198	15.5302	14.2617	14.3508	14.1925	18.1684	22.5134	17.7119	18.682	18.1937	18.234	14.3303	14.3166	14.3505
X29	AGEEDNVISQIQRPVKEL	15.16	15.1406	15.1184	15.1348	16.7814	15.5994	15.1563	19.6277	18.2805	19.5439	17.3297	19.1436	20.1131	19.8237	20.0566	19.2822	18.9165	19.3257
X30	AGLTETWNPNHPE	21.2361	21.0401	21.0976	20.6587	15.1801	15.1844	19.7459	15.178	15.1692	17.6443	15.0733	15.2033	15.2046	15.1978	15.1942	19.5592	19.622	18.5329
X31	AGLTETWNPNHPEL	16.2962	20.4412	16.3055	21.0729	20.691	16.2953	20.4866	19.5333	19.2657	15.3807	16.2836	16.0016	16.3091	16.1465	16.262	16.2385	16.2504	16.3043
X32	AILTVLKPDDRNSF	14.1954	14.2672	14.2343	14.579	14.4638	14.3851	14.1755	14.4973	14.2944	15.8984	14.5843	14.5904	16.1477	14.5828	15.6113	14.553	14.5658	14.5244
X33	AILTVLNSNDRNS	16.1475	16.0809	15.8311	16.5583	16.3376	15.9431	15.8343	15.9855	15.94	16.352	16.5469	16.5586	16.931	16.73	16.4898	16.5648	18.0526	18.5237
X34	AILTVLNSNDRNSF	17.458	17.1987	17.2033	17.519	17.5254	17.3607	17.1803	17.5255	17.1055	17.5256	18.5018	18.692	19.3573	18.3789	19.0874	17.6733	18.7115	18.7127
X35	AILTVLSPNDRNSY	14.9345	14.5599	14.6667	14.9446	14.9467	14.9466	14.6121	14.9458	14.5838	16.4451	16.6422	17.127	17.5515	16.5955	17.6444	14.9491	16.0232	16.4997
X36	AIVIVTVNEGKGDFELVGQR	15.0555	14.9329	15.1202	15.0669	15.3584	15.2097	15.0181	15.2087	15.249	15.376	15.5378	16.4689	15.3579	16.8056	15.3807	15.4614	15.375	15.4454
X37	AIVIVTVNEGKGY	14.6715	14.4483	14.665	14.5582	14.4568	14.5127	14.6692	14.5657	14.0798	17.8971	14.6721	17.3065	16.9085	14.6733	18.3997	18.1128	17.896	17.3573
X38	AIVVLLVNEGKGNLELVGFKNEQQE	13.7073	13.7287	13.7398	13.8159	13.896	13.7503	13.7036	13.9032	14.0237	14.4008	14.0677	14.6505	14.1855	15.1278	14.0715	14.0637	14.3238	14.9511
X39	AKLSPGDVFVIPA	18.0922	18.0471	18.1695	18.0732	18.2073	18.2046	18.028	18.2346	18.2534	19.7035	18.2538	19.5548	18.8084	19.3091	18.7735	18.3636	18.2556	18.9142
X40	AKLSPGDVFVIPAGHPV	15.0179	14.8149	14.8961	14.836	15.3449	14.8835	14.8999	15.3404	15.1606	16.7737	15.3795	15.8183	15.4074	16.9722	16.7871	15.2606	15.3807	15.9561
X41	AKLSPGDVFVVPAGHPVAI	14.235	13.9131	14.021	14.232	14.0897	14.1357	13.9761	16.026	14.2347	18.3256	14.2356	17.5888	18.5313	17.6493	18.9699	16.7148	17.4833	16.8286
X42	ALEPDHRVESEA	19.275	21.3546	20.4953	21.6833	19.2687	19.2788	20.9009	19.19	19.2754	18.9732	19.2784	19.0358	18.9144	19.1137	18.9497	18.93	18.9189	19.0547
X43	ALEPDHRVESEAG	21.8685	15.9215	15.8981	21.2444	21.9768	18.6047	20.5314	15.6796	15.9153	15.9192	22.9234	15.9102	15.8935	15.8726	15.7986	14.1712	15.8645	15.8575
X44	ALEPDHRVESEAGL	17.3093	17.4163	17.238	17.2046	23.8159	16.5238	17.6499	16.4399	16.5118	16.4961	24.1708	16.5232	16.2296	16.2723	16.5196	16.4889	16.3445	16.2169
X45	ALEPDNRIESEGGL	20.1168	20.1415	20.0891	21.0716	21.349	20.1234	20.1236	20.0108	19.9067	19.9682	20.1169	20.1235	20.1216	20.0248	20.1223	19.7906	20.0719	20.1187
X46	ARLSPGDVLVIPAGHPVAI	14.6895	14.3446	14.6256	14.5636	14.5899	14.5955	14.6763	14.669	14.4729	16.957	14.6855	16.3175	17.3185	16.6388	18.1047	16.9057	17.7295	15.821
X47	ASSNLDLLGF	14.0206	13.9355	14.0029	13.951	14.0433	14.0422	13.9281	14.0437	13.9438	15.0597	14.845	14.6685	14.5918	14.8664	14.7289	14.3722	14.2343	14.0452
X48	ASSNLNLLGFGINAENNERNFL	13.1219	13.0915	13.1999	13.0806	13.5315	13.1407	13.1184	13.5348	13.4158	13.5389	14.8022	14.3456	13.5243	13.5381	13.5313	13.5073	13.4715	13.4256
X49	ASSNLNLLGFGINAK	15.4793	15.3046	15.2145	15.3493	15.4791	15.2073	15.2455	15.477	15.4114	16.7427	17.3535	16.0233	15.6348	15.6832	16.3277	15.4798	16.3001	16.0708
X50	AVLTVLNSNDRNS	13.7828	13.5518	13.7456	13.5353	13.84	13.6449	13.8861	13.8399	13.7151	14.5758	14.5377	14.5796	14.578	14.4845	14.5526	17.0424	16.7966	14.5793
X51	AVLTVLNSNDRNSF	14.0694	13.5242	13.2624	13.6366	14.0718	13.8879	13.4943	14.0314	13.5087	15.8302	17.219	14.0655	16.6496	14.0697	16.5924	13.9596	14.0623	13.8683
X52	DALEPDNRIESE	16.5727	22.0232	21.6807	21.5681	16.5562	18.6703	20.6301	16.5133	16.5715	16.5107	16.4383	16.5691	16.3572	16.5691	16.0627	16.3427	15.9474	16.4594
X53	DALEPDNRIESEGG	23.2926	23.0787	22.6037	19.7457	18.6588	18.7037	21.1532	22.1627	19.8763	18.3691	18.6984	18.6444	17.9657	18.4583	18.5167	18.5984	18.1754	18.4939
X54	DALEPDNRIESEGGL	25.3441	25.2738	23.1306	25.2262	25.7103	22.0619	14.0961	24.8357	22.8848	17.2649	22.9058	18.6793	14.2372	16.5165	17.6445	17.1912	17.8345	16.9722
X55	DALEPDNRIESEGGLI	16.4823	15.8765	15.8062	16.3821	19.7225	15.0365	15.7963	17.5486	15.0098	14.6155	15.0288	14.9494	15.0233	14.8306	14.9905	14.9218	14.4116	14.9911
X56	DALEPDNRIESEGGLIET	23.3573	22.6672	23.1207	22.7703	17.9345	20.9669	22.4008	20.4587	19.3693	16.5596	16.9346	16.228	15.3535	15.3677	14.5471	17.3752	17.9105	17.0223
X57	DDEEEQEEET	14.7511	14.7516	16.3357	14.7339	14.7037	14.5779	14.7447	14.7398	14.7491	15.9448	14.7091	18.0217	17.589	16.2881	17.9496	17.9496	17.8253	14.7538
X58	DDEEEQEEETST	19.9391	20.1494	16.1953	19.8825	17.2308	19.9539	16.1962	16.1719	15.952	16.4392	16.2129	16.1896	16.1993	16.9431	17.1014	16.1312	16.7318	17.3038
X59	DDEEEQEEETSTQ	14.9728	14.9713	16.7516	17.2751	17.7442	17.7056	17.6485	14.5744	14.994	15.0008	16.7973	14.9931	14.9344	15.6734	16.241	15.0003	14.9826	15.1549
X60	DDEEEQEEETSTQV	18.4457	15.9931	17.5021	17.6981	16.0058	18.7419	17.7853	19.0452	16.9599	16.6032	16.0165	18.147	16.4511	17.2552	17.7323	17.2676	17.2615	17.5296
X61	DDEEEQEEETSTQVQRY	17.3862	17.3972	17.9398	18.318	18.863	18.4091	18.0381	16.7181	16.7112	17.4178	17.8092	18.0492	17.6138	18.1108	17.9858	18.4339	18.3756	18.3844
X62	DEEEGQEEET	16.0268	19.0383	19.5308	18.7207	15.1854	15.1886	15.184	15.1868	14.4312	16.3242	15.1568	16.9557	17.3384	17.1486	16.1862	17.0597	17.5587	17.7213
X63	DEEEGQEEETTKQV	18.0436	19.8033	18.7884	19.1858	18.0421	18.3806	18.418	20.5823	19.4325	18.8034	18.0434	19.2769	18.9788	19.3256	19.4335	19.2997	19.1803	19.4233
X64	DEEEGQEEETTKQVQ	22.5042	20.6479	20.6329	20.9822	20.8684	21.9256	21.9063	23.1582	21.9773	22.1234	17.856	22.8098	22.2196	22.9752	22.7516	21.9526	22.0623	22.2663
X65	DEEEGQEEETTKQVQR	18.0456	16.1061	17.0471	17.978	20.2901	18.5389	17.6391	16.3217	16.0438	19.9144	22.3001	20.5194	20.4312	20.7921	20.3512	16.0539	20.1136	20.0028
X66	DEEEGQEEETTKQVQRY	19.9363	20.4168	20.9523	18.249	21.8158	21.2154	21.303	16.1691	16.2258	16.2349	18.8258	20.1423	17.4405	19.5771	19.3984	17.2031	16.2522	18.2918
X67	DEEEQEEETSTQVQR	15.2272	15.0817	15.1529	15.23	17.7531	14.861	15.1335	15.2146	14.9978	15.2304	19.1968	15.6545	15.1981	15.2791	15.235	15.2353	15.3933	15.6565
X68	DIFVNSVEIKEGSLLLPNYNS	14.4086	14.1958	14.4816	14.234	14.5817	14.5363	14.5036	14.6678	14.6213	16.3747	14.6622	16.5499	14.6646	16.5946	16.5621	14.6173	14.6348	14.66
X69	DIFVNSVEIKEGSLLLPNYNSR	13.2381	13.225	13.4287	13.2535	13.4718	13.4371	13.2642	13.3821	13.4618	14.542	13.8407	15.2519	13.8661	14.0716	13.8625	13.865	13.8684	13.8684
X70	DLAIPVNNPGQLES	15.387	15.0411	14.8844	15.4506	20.2124	16.8025	16.2111	14.8777	14.8795	18.5845	21.548	14.7851	14.8813	14.8653	17.8793	14.7971	14.7681	14.821
X71	DLAIPVNNPGQLESF	14.0024	13.9137	13.9639	13.8684	18.8022	13.9776	13.9855	14.004	13.7634	15.3502	17.3872	14.9221	15.2152	14.3299	15.2136	15.6521	15.1846	15.431
X72	DLAIPVNNPGQLESFL	13.5431	13.206	13.365	13.3186	13.8069	13.5731	13.4831	13.6514	13.3153	16.1846	16.5399	15.2419	16.2895	15.518	15.5825	16.0213	15.8049	13.6502
X73	DLAIPVNNPGQLESFLLSGT	10.7626	10.9448	10.9259	11.0672	11.0257	10.973	10.7562	10.9563	10.8418	11.8921	11.0579	12.3161	11.9594	11.0614	11.0708	11.0636	11.0664	12.2704
X74	DLAIPVNNPGQLESFLLSGTQNQPS	13.7259	13.6871	13.7831	13.7286	13.716	13.7786	13.7662	13.7846	13.5988	15.955	13.7846	15.2957	16.726	15.7742	15.5822	16.8461	16.609	16.5046
X75	DLAIPVNRPGQLQ	16.8916	16.8909	16.699	16.8693	16.8863	16.7394	16.4358	18.9669	16.8933	16.8876	16.8856	16.881	19.2999	16.9066	19.0773	16.8913	16.8857	16.7635
X76	DLAIPVNRPGQLQSF	14.7585	14.742	14.7471	14.5023	17.9896	14.7532	14.7105	14.75	14.748	19.233	19.3592	19.0581	19.0774	18.7988	18.4676	18.8621	18.8751	19.2454
X77	DLDIFVNSV	13.8688	13.7817	13.8339	13.9584	13.9574	13.9532	13.8267	14.9078	13.9591	16.0573	13.9559	15.5568	15.979	15.7427	15.7036	14.9871	14.488	14.7735
X78	DLDIFVNSVEI	12.7846	12.7823	12.7687	15.2846	12.7261	17.7221	12.784	11.5436	12.6584	16.0338	12.7379	17.3	16.091	15.9219	16.7503	12.7847	12.7957	13.04
X79	DLDIFVNSVEIK	14.5397	14.5364	14.2703	14.5223	16.5317	17.3446	14.5396	16.7462	16.192	16.7812	17.7299	16.4515	16.4438	16.4344	16.4871	14.5417	14.854	15.2978
X80	DLDIFVNSVEIKEGSLLLPNYNS	15.5243	15.3317	15.4459	15.4085	15.5258	15.5139	15.3862	15.3962	15.4096	16.082	15.5254	16.3407	16.3926	15.9973	16.9032	15.5494	15.7441	15.5259
X81	DLNFTPNEFDS	17.4668	13.3352	12.4086	12.0987	13.1821	13.1614	13.1797	16.7538	17.0375	13.1895	17.4656	13.8653	12.6485	13.1659	13.1953	12.8214	13.1887	12.917
X82	DLSAPDLDNSGGGGSIK	13.9975	14.0487	16.6846	14.0056	14.0479	14.0147	14.052	14.0021	13.925	14.2795	13.8347	14.073	14.8231	14.3804	14.0667	16.7488	16.8256	17.3408
X83	LCESNADCTNKGSGK	15.884	15.7611	15.8085	15.8256	16.125	15.6394	15.6948	15.9169	15.7954	16.2504	17.8719	16.146	16.0528	16.1142	16.014	16.1536	16.7921	16.1518
X84	DTIEKVLLEEQENEPH	12.3178	12.4415	12.841	12.4126	12.8637	12.215	12.3543	13.0083	12.4185	13.0252	13.0113	13.018	14.855	13.0063	13.0213	17.3804	16.0701	16.3816
X85	DTSNIANQLDSTPR	15.9688	15.8099	15.8121	16.1031	20.5432	16.1115	16.1067	15.9401	15.4975	15.89	16.5592	16.1053	16.0846	15.8088	16.0799	15.6099	15.3459	15.5597
X86	DVIVKVSREQIEELSKNA	16.6349	16.5777	16.7459	16.6388	16.7443	16.5352	16.6587	16.755	16.6745	16.7556	16.7505	16.7606	16.7599	17.1736	17.2363	17.9061	17.9021	17.864
X87	EAAFNTDYEEIEK	16.2152	16.2171	16.2261	16.1808	19.5157	15.7092	16.156	18.4298	17.4477	16.2342	20.5045	16.4002	16.0597	16.223	16.1774	16.2115	16.3761	16.384
X88	EAAFNTDYEEIEKV	16.6629	15.5405	14.7783	15.6957	14.7763	16.5924	15.9397	18.8716	18.3659	18.0076	14.7553	17.9653	19.289	18.5214	19.2027	18.1139	18.1249	18.0367
X89	EAAFNTDYEEIEKVL	13.43	13.4295	13.3834	13.3672	13.4326	13.4181	13.4392	16.9555	16.6605	16.1088	13.4397	16.1407	15.8072	16.4707	16.6633	15.9194	15.7736	16.5096
X90	EAAFNTDYEEIEKVLL	14.2579	13.0594	13.0534	12.9155	14.6683	13.09	13.1979	13.0787	13.0226	16.4639	15.6425	17.0728	16.5218	17.0968	17.1925	16.8193	16.395	16.8803
X91	EAAFNTDYEEIEKVLLEDQEQEPQ	14.7706	14.6712	14.8456	14.6757	14.8455	14.7431	14.7846	14.602	14.6283	14.8462	14.846	16.3675	15.0165	15.6779	15.9097	15.5031	15.4871	15.6913
X92	EAAFNTEYEEIEK	14.5326	14.1202	14.2702	14.3687	15.3013	13.8005	14.0681	14.5464	14.1814	15.4523	20.8825	15.3109	15.0141	15.1463	14.9428	15.2929	17.0855	15.269
X93	EAAFNTEYEEIEKV	17.411	15.9416	16.1621	16.452	17.701	17.5935	16.8253	19.781	19.0241	18.9429	14.6622	19.2453	20.2035	19.9715	20.1038	19.3406	19.1621	19.4846
X94	EAAFNTEYEEIEKVL	15.6924	13.6109	13.6133	13.5255	16.1743	13.6078	13.4829	14.3764	13.6203	17.3808	14.716	17.7492	17.2895	17.7734	17.9724	16.6547	16.401	16.8765
X95	EAAFNTEYEEIEKVLL	15.6636	14.4396	14.452	14.4275	15.3196	14.6538	14.3254	14.411	14.2573	17.968	16.2396	18.4327	17.9904	18.6078	18.6883	17.6462	17.6172	18.0254
X96	EAAFNTEYEEIEKVLLEEQEQ	13.8016	13.7622	13.7739	13.8262	13.8808	13.8228	13.7103	13.8801	13.6903	13.8827	13.8772	14.484	14.4969	14.8673	14.6276	13.8827	13.882	14.3543
X97	EAAFNTEYEEIEKVLLEEQEQK	16.2269	16.1807	16.3156	16.2469	16.3137	16.3209	16.2687	16.2812	16.2538	17.1853	16.3226	18.5093	17.2513	17.7927	17.8362	17.0582	17.0431	17.7407
X98	EAAFNTEYEEIEKVLLEEQEQKS	14.4389	14.3194	14.4889	14.5045	14.4049	14.4815	14.4116	14.3853	14.2971	14.4925	14.4898	15.3521	15.2692	15.0423	14.6311	14.879	15.2854	15.0969
X99	EASFNTGYEEIEK	17.9575	17.2908	17.1998	17.2608	20.2927	16.9467	17.0581	19.1059	17.7394	17.2922	21.1513	17.9558	17.5568	17.2966	17.2532	17.2802	17.2882	17.2903
X100	EASFNTGYEEIEKV	16.7148	15.9365	15.686	16.614	16.5414	17.5605	16.6968	18.505	17.0719	18.5587	15.1724	17.8145	17.9917	18.1479	18.1952	16.7112	16.1956	16.6294
X101	EASFNTGYEEIEKVL	13.1418	12.9839	12.987	13.2136	13.296	13.0933	13.0179	14.8136	13.3304	14.3963	13.3277	13.6209	14.3155	14.2508	14.4589	13.3221	13.2378	13.3293
X102	EASLNTKYDTIEKVL	14.1638	14.0146	14.2458	14.2127	14.5391	14.3957	14.1248	14.2913	14.3128	14.5268	14.5288	15.7454	14.5036	16.057	14.5339	14.7436	14.5418	14.5247
X103	EASLNTKYDTIEKVLL	14.62	14.6922	14.8845	14.5138	14.4174	14.5933	14.5541	14.7982	14.8871	16.787	14.8944	17.2193	14.893	17.317	14.8946	16.7978	16.8263	17.562
X104	EASLNTKYDTIEKVLLEEQENEPH	16.7021	16.7808	16.7307	16.8916	16.9183	16.6725	16.6869	16.7315	16.6335	16.9188	16.9183	17.4265	17.3475	17.471	17.2365	17.3552	17.5411	18.5162
X105	EASLNTKYDTIEKVLLEEQENEPHQ	13.7072	13.5477	13.5556	13.5942	13.8072	13.6171	13.5582	13.9858	13.8689	14.9823	13.9817	14.1416	14.1361	15.3565	14.5836	13.926	14.1378	14.2513
X106	EDEDEDEEE	14.7521	14.6113	14.5576	14.6542	14.6024	14.6241	14.6127	14.6262	14.6327	14.8826	14.7969	14.7541	14.884	14.8784	14.8717	15.1198	15.5961	14.8866
X107	EDNDFETKIDT	20.4145	19.6955	18.493	19.6757	17.1606	17.1859	19.2916	19.4688	17.5613	16.973	17.1645	17.1004	16.753	17.1779	17.1554	16.7149	16.7709	16.9251
X108	EEDEDEDEKEE	17.1055	17.1031	16.9266	17.1499	16.888	17.0026	17.0334	16.663	16.8832	17.1496	17.0421	18.1356	17.1522	17.6605	17.7207	17.1506	17.8593	18.4511
X109	EEDEEEKEQ	15.458	15.4028	15.2335	15.6056	15.4341	15.3211	15.2998	15.2735	15.3471	15.5079	15.5819	15.6068	15.6044	15.604	15.5638	15.6054	16.4574	16.4795
X110	EEEEGEWRGSQ	18.5781	18.8389	15.5644	16.7991	15.3709	15.5484	16.571	15.5311	15.0945	15.5336	15.5688	15.5606	15.0601	15.3886	15.4296	15.0715	14.8622	15.248
X111	EEEGQEEETTKQVQ	17.8907	16.9733	16.0227	16.0596	17.7077	18.3126	18.331	16.0228	19.3954	17.6631	16.0217	18.1263	17.5255	18.7645	18.5516	17.795	17.595	16.0314
X112	EEEGQEEETTKQVQR	15.0582	15.0544	15.3275	15.1555	16.1064	15.1086	15.2667	15.5043	15.3014	15.5064	18.1564	16.1568	15.5025	16.1637	15.5031	15.9142	15.505	15.5063
X113	EEESEEQNEGNSV	19.1055	18.6352	16.5456	17.8198	18.8004	16.5199	17.7435	16.5255	16.4435	16.5429	20.7899	16.5454	16.0802	16.4351	16.5337	16.0092	16.1737	16.3505
X114	EEESEEQNEGNSVLSGF	12.6465	12.9838	12.928	13.0683	17.3168	12.3515	12.6118	13.0705	12.4668	13.0738	16.1107	14.4011	15.4169	14.7185	14.2743	16.2666	15.719	20.0185
X115	EEETSSESQER	14.0262	13.8494	13.9762	14.068	14.764	13.8961	14.0367	14.4537	14.0796	15.0537	18.2495	15.0365	14.8539	14.8778	15.1093	14.5772	14.7599	14.7108
X116	EEVKVEVEDD	16.6439	16.7067	16.6503	16.8033	16.6772	17.0742	16.8013	16.6443	16.6888	16.7085	16.6618	16.7571	16.7552	16.7282	16.7465	16.83	16.7209	16.7254
X117	EGSLLLPNYNSR	14.9234	14.8605	14.8784	14.9992	21.4532	16.3448	15.5387	14.6984	14.458	14.4645	14.9789	14.9941	14.9793	14.4881	14.9836	14.5077	13.8832	14.1782
X118	EIKEGSLLLPH	19.0953	19.0666	18.9516	19.1873	19.1352	19.0459	18.9293	19.1719	19.0134	19.1869	19.1879	19.1884	19.6542	19.4657	19.1881	19.1871	19.5954	19.8181
X119	EIKEGSLLLPHYNS	17.1452	17.1101	17.0627	17.17	17.1227	17.1657	17.0321	17.2403	17.0717	17.2665	17.1688	17.2819	17.611	17.2669	17.2672	17.1832	17.2429	17.2063
X120	EIKEGSLLLPN	23.0785	13.1731	22.9665	12.2783	18.2812	21.9892	13.1249	21.6286	21.1239	21.5785	14.2526	21.0697	21.2218	21.1962	21.5091	22.6273	22.2433	21.986
X121	EIKEGSLLLPNYN	12.7009	12.7772	13.1978	12.9503	13.1866	12.7618	13.2071	13.0643	13.2119	17.4067	16.7175	18.0367	13.2197	18.2267	18.5039	13.2181	13.219	16.9712
X122	EIKEGSLLLPNYNS	20.4898	19.4855	19.6905	20.1332	17.5814	20.6293	19.924	16.6885	16.6922	21.6575	16.7227	21.7293	21.8965	21.9819	22.9337	20.6735	20.8133	20.7355
X123	EINEGGLLLPH	20.5808	20.5483	20.5428	20.4109	16.4474	20.1299	19.9868	19.2765	18.9834	20.3411	19.2005	19.3991	20.2526	19.4369	19.1701	16.3389	19.7246	20.1332
X124	EINEGGLLLPHYNS	15.8512	15.9444	16.2944	16.0127	16.4153	16.0237	16.1855	16.413	16.0558	17.0592	16.4173	17.1059	17.2224	17.7809	17.8626	18.1113	16.6878	17.9196
X125	EITPEKNPQL	21.3979	21.562	21.4148	22.2037	24.0481	22.1422	22.7895	22.6678	22.4011	20.6703	24.4561	20.443	20.8355	19.6219	18.6575	20.6801	20.4142	20.1454
X126	EITPEKNPQLQD	21.7651	21.3836	20.4856	20.9333	23.4425	19.2752	20.656	20.7336	21.0566	15.142	23.8258	15.1584	15.1594	15.0924	15.0898	15.1498	15.1428	15.1528
X127	EITPEKNPQLQDL	18.3732	17.7806	18.0511	18.5692	21.8156	17.4108	16.4197	20.4598	18.3125	16.383	23.8468	19.0766	19.6152	19.2781	19.1149	19.7542	19.2252	19.7717
X128	EITPEKNPQLQDLD	15.6262	15.5141	15.5061	15.5679	20.1336	15.4415	15.6401	15.6381	15.4102	15.6527	20.2985	15.6507	15.6121	15.4084	15.6516	15.6347	15.4585	15.4119
X129	EITPEKNPQLQDLDI	17.9416	17.0561	17.3942	18.2029	20.6738	17.8454	17.9381	19.0226	18.0254	16.9495	21.2799	18.5115	19.3306	18.655	19.8182	18.4261	17.9305	18.246
X130	EITPEKNPQLQDLDIF	17.4739	17.4613	17.3746	17.4477	21.1008	17.4683	17.4775	17.4796	17.3397	18.0733	22.0131	17.7379	18.6786	17.7845	18.5465	18.0262	17.4853	17.4975
X131	EITPEKNPQLQDLDIFV	14.6859	14.7555	14.6991	14.748	14.7631	14.4633	14.3627	17.3674	14.7635	15.4354	14.8411	15.7205	16.1262	15.7391	15.5894	16.7575	16.3365	16.4331
X132	EITPEKNPQLQDLDIFVN	16.062	15.9393	15.9543	16.0798	16.0806	15.977	15.7265	19.2333	16.4853	18.8415	16.0822	18.2996	18.6539	18.3807	18.2992	18.2093	17.6833	17.9636
X133	EITPEKNPQLQDLDIFVNS	13.1822	13.6219	13.64	13.3963	13.5452	13.1707	13.4494	15.3588	13.6511	15.0291	13.6467	13.6612	13.6537	13.9526	13.6552	15.6717	13.6511	14.7261
X134	EITPEKNPQLQDLDIFVNSV	15.4697	15.3148	15.5009	15.4829	15.4354	15.497	15.333	17.7511	15.5058	18.9664	15.5057	18.3957	18.9229	18.8759	18.7646	19.1877	18.5025	18.305
X135	EITPEKNPQLQDLDIFVNSVEI	12.2505	12.0806	12.142	12.2639	12.5458	12.2362	12.444	12.3944	12.2198	12.5525	14.6404	12.5635	12.5607	12.5684	13.0646	12.3571	12.44	12.4104
X136	EITPEKNPQLQDLDIFVNSVEIK	15.3063	15.1641	15.2976	15.3232	15.4314	15.3745	15.2128	15.6388	15.364	17.3455	17.9581	16.5074	16.7607	17.0531	16.3694	15.952	15.9009	15.4321
X137	EKIPGTEQS	17.8013	21.3406	22.1434	20.9925	17.8057	17.8105	20.4305	17.821	20.162	17.5633	17.0074	17.2391	17.1969	17.8099	17.4547	17.7732	17.4847	17.7319
X138	ELAFPGSAQEVDR	16.1061	16.05	16.9072	16.6253	20.9926	17.049	16.0465	15.9763	15.822	17.8721	23.4129	17.9092	17.5455	17.2966	18.0656	16.0225	16.243	17.1956
X139	ELAFPGSAQEVDRL	14.5414	14.3422	14.519	14.3956	18.8894	14.3882	14.4986	14.5823	14.3736	14.6003	18.4944	15.8326	14.5874	14.5668	14.5982	14.4437	14.3253	14.5696
X140	ELAFPGSSHEVDR	13.1202	12.5088	12.8017	12.5217	13.7073	13.2066	13.2237	13.271	13.1031	19.4132	23.8011	17.9098	13.7788	13.8052	18.1296	13.6678	13.8196	13.769
X141	ELAFPGSSHEVDRL	13.1508	13.1764	13.2025	13.1995	13.1046	13.1514	13.1817	14.0472	13.4686	16.8023	14.0897	14.2763	14.3356	14.3349	14.3162	14.6103	14.3366	14.4497
X142	ENDDEEEQEEETSTQVQ	16.2383	20.5901	21.1476	19.2183	16.2323	18.804	18.4121	16.2409	16.214	16.0631	15.8196	16.1093	16.2352	16.2401	15.895	16.2394	15.7773	16.1666
X143	EQIEELSKNA	19.8592	18.0707	18.9433	18.5938	17.5824	20.3095	18.6141	14.7849	21.0032	21.1369	14.7205	21.4289	21.1216	18.4797	20.1963	14.7868	16.6416	14.7466
X144	EQIEELSKNAK	18.7162	18.5835	18.7068	18.6694	18.9152	18.7208	18.8146	18.8132	18.7666	18.9282	20.6005	19.8516	18.918	19.6957	19.4607	18.9581	19.2178	18.9287
X145	EQSPGQWRP	19.0725	18.7425	20.1597	20.5316	17.754	20.6587	20.265	17.7367	17.7506	17.7527	17.6929	20.5022	20.3385	20.4873	18.5393	20.8633	21.0347	20.3645
X146	EQSPGQWRPS	17.1067	16.1047	15.6015	16.2278	15.8014	16.1543	15.7248	16.1581	16.2073	17.5103	16.2164	16.2173	17.3043	17.8755	17.1494	16.2236	19.3361	16.2209
X147	EQSPGQWRPSHGKEEDEEEKE	15.9195	15.5418	14.9436	15.9195	15.3248	15.4035	15.2722	15.0774	15.3725	15.9228	15.6789	15.9004	15.9165	15.9215	15.9178	15.9146	18.7393	17.601
X148	EQSPGQWRPSHGKEEDEEEKEQ	17.9678	17.9325	17.9804	17.9375	18.0431	17.9591	18.0306	18.0387	17.9932	18.1775	18.1768	18.1381	18.1757	18.1614	18.1773	18.7918	18.633	18.1776
X149	ETWNPNHPE	20.2199	20.5745	20.5735	22.1702	20.5744	22.189	22.2671	20.3335	20.5744	20.3614	20.3075	20.5726	20.5083	20.4568	20.5493	20.382	20.417	20.2669
X150	ETWNPNHPEL	21.2746	21.227	21.9613	22.9284	21.8724	22.7215	23.2607	22.2523	22.976	14.1772	14.2056	20.2109	14.1845	19.8437	14.1956	14.1842	14.1727	14.2117
X151	EVDRLLTNQ	17.624	17.6276	17.5294	17.7189	17.7236	17.6496	17.436	18.3912	17.7649	18.6335	17.8561	17.8594	18.97	18.1948	17.8521	17.8477	17.8505	17.8406
X152	EVDRLLTNQK	19.1046	19.1649	19.2223	19.1817	19.24	19.1774	19.0791	19.2481	19.2039	20.3219	19.8212	20.0106	20.2446	20.1263	19.2435	20.0036	19.7885	20.0929
X153	EVDRLLTNQKQSH	15.0359	15.0308	15.0159	15.1475	15.0961	15.1002	14.9291	15.4356	15.1429	16.3619	15.4331	15.4376	16.325	15.4395	15.4381	15.4175	15.4371	15.3167
X154	EVESSDTIDNV	19.1049	18.8903	18.8216	17.8797	17.3294	17.3252	17.3304	17.3265	17.0075	17.2808	17.2969	17.2882	17.2436	17.2389	17.1392	17.3251	17.2455	17.3267
X155	FDKRSDLFENLQNY	15.2578	15.1227	14.9693	15.1693	15.132	15.0126	14.8118	15.2581	14.529	15.258	14.9413	15.2608	17.525	15.2503	17.4729	15.2613	15.2541	15.2538
X156	FEITPEKNPQ	23.3982	23.6801	23.8622	24.8384	19.7906	19.778	24.5351	19.7683	19.7837	24.2121	21.9123	23.4152	20.2683	23.3269	21.2864	23.9123	24.1539	23.7384
X157	FEITPEKNPQL	14.5961	14.5384	14.5122	14.4213	22.065	14.6546	14.6173	14.3275	14.3723	14.6291	21.7984	14.6103	14.598	14.254	14.8174	14.4889	14.1639	14.2125
X158	FEITPEKNPQLQD	17.8745	17.8517	16.8432	17.6962	20.8197	16.7775	17.8833	17.9462	16.4383	16.8478	21.7321	16.4935	16.4383	16.9075	16.4427	20.0013	19.1152	19.4354
X159	FEITPEKNPQLQDL	15.9338	15.2576	14.8131	14.7087	19.9278	14.8408	15.2622	14.696	14.6589	19.2644	20.2932	18.933	19.4929	19.7594	18.3121	18.8305	18.8694	19.3035
X160	FEITPEKNPQLQDLDI	14.2144	14.0806	13.9701	14.2066	17.6384	14.1408	14.1854	16.3188	14.1575	16.7559	21.1226	14.2298	15.2985	14.7557	15.7008	15.879	15.6852	15.0316
X161	FEITPEKNPQLQDLDIF	14.8839	14.6956	14.8452	14.858	14.8815	14.8841	14.8749	14.8841	14.454	18.3807	20.4117	18.6707	18.7838	18.768	19.0552	19.3135	18.9766	18.448
X162	FEITPEKNPQLQDLDIFV	16.9633	16.9775	17.2274	17.0197	17.2238	16.6032	17.0221	17.2187	16.7688	17.2329	19.5762	17.3602	17.499	17.5762	17.7264	20.4165	20.4625	19.7325
X163	FEITPEKNPQLQDLDIFVN	14.2899	14.0599	14.2792	14.2125	14.2085	14.2921	14.2392	14.2933	14.1953	17.704	14.2783	17.1086	17.138	17.2731	17.5558	16.687	17.5629	17.0799
X164	FEITPEKNPQLQDLDIFVNS	16.2809	16.4053	16.6537	16.3661	16.6542	15.9976	16.4331	16.6522	16.2432	16.9984	19.024	17.1772	16.6568	17.342	17.1029	19.7634	19.3412	19.3041
X165	FEITPEKNPQLQDLDIFVNSV	18.0477	17.8142	17.8897	17.8633	17.9061	17.999	17.8714	17.8715	18.0456	18.8692	18.0458	19.1121	18.5185	19.1137	18.9886	18.0481	18.7089	18.0611
X166	FEITPEKNPQLQDLDIFVNSVEI	13.4107	13.365	13.4162	13.3711	13.4453	13.4079	13.4029	13.4158	13.41	13.7759	13.514	13.8426	13.5397	13.5401	13.9751	13.5387	13.5338	13.5398
X167	FEITPEKNPQLQDLDIFVNSVEIK	16.7993	16.6792	16.7747	16.745	16.7005	16.7995	16.6494	16.7782	16.7996	18.377	16.7999	18.5816	18.1311	18.7255	18.055	17.4962	17.9792	18.1933
X168	FELVGQRNENQQEQ	15.2474	15.2559	15.2295	15.4537	15.3931	15.3545	15.1652	15.7874	15.4199	17.0153	15.7705	15.7887	17.129	15.9311	15.787	15.7609	15.8298	15.6658
X169	FEVTPEKKYPQLQDLDL	12.9459	12.2161	12.6496	12.2954	13.3551	12.3431	13.3247	13.1082	12.1071	13.3636	19.1704	13.1197	14.6068	13.3412	15.9694	19.6621	19.1076	13.3633
X170	FFEITPEKNPQL	19.2124	18.423	17.5115	17.8892	18.9983	19.7381	17.5751	17.5611	17.5037	20.9427	19.4332	21.2014	21.0489	21.1021	21.5577	17.5396	17.5681	17.5379
X171	FFEITPEKNPQLQ	19.93	19.301	19.5525	18.9974	18.6832	21.0412	18.2567	18.2031	18.1779	21.7489	22.16	21.4658	20.3641	21.0698	21.5853	18.2622	18.3833	18.3154
X172	FFEITPEKNPQLQD	14.6479	14.7956	14.8657	14.8228	15.0748	14.0336	14.432	17.4552	15.078	16.3181	17.3095	15.5463	15.4163	15.458	15.8446	15.0809	15.2377	15.5162
X173	FFEITPEKNPQLQDL	16.7586	16.2362	16.352	16.6293	17.5644	17.0407	16.0844	17.0342	16.3661	22.9255	22.6751	19.9665	20.2975	20.0789	20.2018	17.3627	18.3926	18.5731
X174	FFEITPEKNPQLQDLD	14.2452	14.5094	14.4107	14.4133	14.4981	13.8021	13.7727	16.8006	14.5122	15.2195	15.301	14.8245	15.8051	14.5145	14.698	14.506	14.5191	14.6806
X175	FFEITPEKNPQLQDLDI	15.9296	15.9307	15.9267	15.9017	15.9277	15.4239	15.826	19.1206	17.0906	16.7826	19.0826	17.4109	16.622	17.3225	17.8504	15.9311	16.5559	16.6191
X176	FFEITPEKNPQLQDLDIF	14.4379	13.3464	13.7736	13.8521	14.3953	14.3975	14.4117	14.4277	13.7963	14.4251	19.9095	18.3841	18.2437	18.0616	18.775	16.6526	17.3321	14.4344
X177	FFEITPEKNPQLQDLDIFVN	14.3308	14.1086	14.3281	14.3378	14.1836	14.318	14.3202	14.3378	14.3149	18.8427	14.3439	18.669	18.5788	18.4908	18.7827	16.6891	17.7545	17.4042
X178	FFEITPEKNPQLQDLDIFVNS	13.0253	12.8235	12.8425	13.0313	12.8687	13.0315	13.0037	13.028	13.0204	17.0769	13.0332	16.7707	16.4349	16.6381	16.573	14.3959	15.8435	16.3989
X179	FFEITPEKNPQLQDLDIFVNSV	15.509	14.1289	13.9155	12.9725	13.0106	13.0278	12.6582	13.0079	12.5098	20.9125	13.7084	20.1859	20.8925	20.3994	19.6027	18.9471	19.3635	18.2641
X180	FFEITPEKNPQLQDLDIFVNSVEIK	14.1847	13.8108	13.9664	14.1488	14.158	14.1835	13.9336	14.1657	13.8553	19.5732	17.4002	19.3801	18.7027	19.6773	19.0752	16.7151	17.4218	17.8267
X181	FFEVTPEKKYPQLQDL	15.7037	15.6947	15.6869	15.7726	15.8238	15.7336	15.6105	16.1488	15.8852	16.8369	15.9899	16.1337	16.784	16.6155	16.0647	15.9549	15.9883	15.9937
X182	FFEVTPEKKYPQLQDLDL	14.9278	14.742	14.5357	14.9236	14.7534	14.7627	14.7091	15.0462	14.9164	15.674	14.9345	17.3361	16.0586	16.6533	17.4151	14.9364	16.7655	16.766
X183	FFEVTPEKKYPQLQDLDLL	14.4526	14.2949	14.3833	14.3931	14.429	14.439	14.4097	14.1853	14.2369	14.731	14.5055	16.4272	14.9981	15.8121	16.3673	14.5049	15.2697	15.3915
X184	FGKFFEITPEKNPQLQDL	11.5251	11.5416	11.5859	11.6535	11.576	11.6169	11.4141	13.1939	12.2038	18.4584	13.5084	13.8676	14.1185	14.6436	13.8623	13.8482	13.8163	13.8059
X185	FGKFFEITPEKNPQLQDLDIFVNSV	15.0996	14.7444	14.8621	14.8026	15.0475	14.9241	14.8977	14.8557	14.9328	16.4425	15.0886	16.4675	15.2178	16.6105	16.8235	15.1101	15.9976	15.4787
X186	FLPQFTDADF	12.6185	12.806	12.9883	12.771	12.8612	13.1518	12.3873	14.3878	14.7845	17.3046	13.1892	17.9012	17.8547	17.0979	13.1855	12.78	13.1881	13.1878
X187	FLPQFTDADFI	13.1848	13.4367	13.2178	14.2924	13.1808	13.2062	14.0614	13.4876	13.1147	16.5463	13.1962	16.0066	16.9065	15.5781	16.4284	15.348	14.8679	14.9411
X188	FLPQQTDADF	13.7972	13.4569	13.8045	13.6687	13.1855	13.7835	13.6178	13.7723	15.8032	17.3841	14.5492	17.419	18.0997	17.1507	13.7689	13.7851	16.6214	13.7975
X189	FLPQQTDADFI	13.0092	12.9199	13.0911	13.0665	12.9976	13.1834	12.7871	13.3873	13.15	16.4741	13.3994	15.5817	14.8591	14.7207	14.5582	13.3991	13.3947	14.4662
X190	FLPQQTDADFILV	13.3146	13.3044	13.1621	13.2921	13.3147	13.3019	12.8789	14.9764	13.319	13.3152	13.3095	14.4314	15.6321	14.3722	14.7005	13.3145	13.3676	13.314
X191	FLPQYTDAD	16.1182	16.104	16.0889	16.1187	16.007	16.0997	16.0698	16.0389	16.1219	16.5194	16.1202	16.4346	16.1214	16.3732	16.1225	16.1544	16.47	16.5122
X192	FLPQYTDADFI	14.7602	14.8012	14.8786	14.8667	14.8632	14.9461	14.7345	15.0786	14.8106	16.1976	15.039	15.6165	16.5589	15.2879	15.2764	15.7801	15.2243	15.1434
X193	FLPQYTDADFILVVLSGK	12.9787	13.0314	13.2452	13.0091	13.1549	13.0849	13.0276	13.248	13.0024	13.537	13.3569	13.7756	14.2043	13.3256	13.2497	15.0694	14.2421	13.9616
X194	FLTGSDDNVISQ	16.3271	16.6301	16.6326	18.3905	20.4796	16.6344	18.0953	16.6244	16.2809	16.263	16.622	16.5558	16.6039	16.4623	16.6323	15.9154	15.9433	16.1958
X195	FLTLFENENGHI	13.8505	13.8372	13.9435	13.8783	13.8704	13.9282	13.8775	13.7894	13.8084	14.5067	13.9435	15.0951	14.2282	14.5609	14.815	13.9445	13.9941	14.4682
X196	FLTLFENENGHIR	14.6078	14.5091	14.5262	14.5851	14.8698	14.5083	14.4593	14.8761	14.5679	14.8777	14.8063	14.8787	15.4866	16.0528	15.8605	14.8694	14.8721	15.6937
X197	FNLEEGDIM	13.2542	12.7276	13.5401	12.8277	13.2668	13.5001	13.2715	15.3057	13.5493	17.8754	13.551	17.1092	13.8836	15.6587	16.2793	16.2752	14.1457	15.6352
X198	FNRAEDLATAMEAR	15.395	13.7268	13.7384	13.7069	15.8465	13.658	13.7323	12.7032	13.628	18.276	13.7583	19.0499	13.7506	18.8824	19.5051	13.7506	18.7858	18.5639
X199	FNTDYEEIEK	17.5408	17.8631	17.8714	17.8672	17.7208	17.7002	17.3357	21.2533	21.5555	20.3993	17.8717	17.8593	20.3131	17.8678	17.8581	20.314	20.1581	20.8022
X200	FNTDYEEIEKV	17.0397	16.9938	17.3645	18.9113	15.9791	18.4543	19.0996	15.972	15.9784	15.9656	15.9501	15.991	15.9716	15.925	15.9582	15.7583	15.9575	15.7783
X201	FNTEYEEIEKV	18.5217	18.6372	18.2666	19.3211	14.0662	19.3078	19.8473	19.5837	17.5146	14.0229	14.0663	14.0653	14.0586	14.0644	14.0585	14.06	14.0602	13.5884
X202	FNTEYEEIEKVL	13.8332	13.6491	13.6696	13.7361	13.7022	13.8234	13.6617	14.6171	13.9894	15.683	13.9766	14.7182	14.6134	14.4638	15.1717	13.9855	13.9916	13.989
X203	FNTEYEEIEKVLL	12.703	12.5892	12.7103	12.6794	12.7071	12.7034	12.7128	12.714	12.525	14.6317	12.7097	15.2438	14.7523	14.7985	15.5443	14.2578	14.1344	14.8115
X204	FNTEYEEIEKVLLEEQEQK	14.4542	14.4475	14.4447	14.4377	14.4528	14.4295	14.4459	14.4773	14.4607	14.6074	14.476	14.4774	14.4772	14.4773	14.6	14.4768	14.477	14.5376
X205	FQTLYENENGHI	20.2179	19.1951	19.7281	19.0911	17.9121	19.792	18.9339	17.8711	17.8991	21.542	17.8722	21.2071	19.9475	21.0435	21.3228	17.9119	19.2203	19.9013
X206	FQTLYENENGHIR	16.7045	16.2154	16.504	16.7443	18.1534	16.7898	16.6091	16.8023	16.3994	18.0566	21.5495	19.0486	18.685	18.8161	19.1479	16.8039	17.7856	18.2991
X207	GDAMVNILSGEAEITIEGTI	13.9899	13.2992	12.9562	13.9878	13.7021	13.8227	12.8758	16.4953	15.1604	19.2021	16.3209	14.0033	18.0692	13.998	13.9007	13.9995	17.1777	13.9898
X208	GDTIKLPAGTI	20.7911	20.7654	20.7903	20.9102	20.856	20.9399	20.7008	20.8883	20.7266	21.1064	20.8963	21.5616	21.694	21.1067	21.1059	21.0157	21.0487	21.1065
X209	GDTIKLPAGTIA	13.9506	13.8789	13.9961	13.9317	12.3396	13.9468	15.527	13.8759	13.9738	20.6454	14.0295	14.0141	14.0221	13.7339	13.9746	20.8972	20.2809	14.1318
X210	GDTIKLPAGTIAY	12.8425	12.9126	12.6943	12.8671	21.053	12.8117	12.9856	13.0942	12.6563	13.0498	19.6931	13.0336	17.9302	13.1137	16.5636	17.1418	13.0481	13.0674
X211	GDTIKLPAGTIAYL	15.9187	15.6993	15.8021	15.8914	16.914	15.912	15.7961	15.9173	15.7651	16.9906	18.0675	16.9889	16.8321	16.5306	16.9363	15.9194	16.3578	16.4284
X212	GDTIKLPAGTIGYL	15.3683	15.1224	15.3723	15.3241	17.5243	15.3371	15.3057	15.3748	15.2866	16.776	18.4717	16.5082	15.3785	16.4215	15.3651	15.3665	15.3066	15.5785
X213	GFGINAENNER	18.3657	13.4851	13.477	13.4975	22.7196	13.4866	13.4246	20.9847	13.477	13.5023	16.0668	20.6621	16.6583	20.6316	21.0757	20.4382	20.0756	21.0342
X214	GFGINAENNERN	16.3719	16.5542	16.5324	16.624	17.3842	17.0827	17.4146	17.3953	21.0164	17.3957	16.3991	17.42	17.2195	17.5747	18.0648	17.372	16.8447	16.6658
X215	GFGINAENNERNF	17.8601	17.9632	17.9661	17.936	18.0852	17.8789	17.9037	18.1151	17.948	18.4741	18.1119	18.1454	18.1616	18.1151	18.1148	18.5092	18.1163	18.86
X216	GFGINAENNERNFL	17.1373	16.2477	15.5625	16.0303	17.1051	17.6984	15.593	15.5982	15.5575	18.526	16.7311	19.7252	19.051	19.6779	20.1164	17.7909	18.1033	18.0552
X217	GFGINAENNQR	14.1182	13.3677	13.2888	14.2815	21.7991	12.7255	13.705	14.3084	14.3378	16.0412	22.3728	14.3441	14.344	19.984	14.3003	17.4957	19.1241	19.5248
X218	GFGVNAENNQ	17.4418	17.3641	17.518	17.3698	17.5089	17.5184	17.481	17.5122	17.443	18.5677	17.518	19.6553	18.7404	19.1964	19.3596	19.0958	18.5396	19.2063
X219	GINAENNER	18.232	18.1124	18.127	18.2473	24.4388	18.202	18.2219	18.2399	17.9848	18.2408	23.3391	19.1849	18.4558	18.2342	18.2907	18.2742	17.9983	18.0561
X220	GINAENNQR	17.1837	17.0365	17.1689	17.2077	17.919	17.0345	17.1667	17.6094	17.2565	18.1727	21.2702	18.2657	17.9314	18.0349	18.0403	17.7959	17.9779	17.834
X221	GKFFEITPEKNPQ	15.8419	16.1982	15.85	15.7733	15.6722	15.742	15.7656	15.6422	15.6396	15.6378	15.6802	15.6257	15.6276	15.6141	15.609	15.6426	15.5838	15.6305
X222	GKFFEITPEKNPQLQDL	13.8479	13.9657	14.17	13.8934	14.7216	13.9802	14.1742	14.6676	14.2764	14.7951	14.5556	14.6847	14.7542	14.7244	14.6906	16.8573	15.1296	15.0748
X223	GLHLPSFSPSP	20.8294	20.7161	19.4058	18.4807	17.4246	20.1112	17.4181	18.6655	17.394	19.2322	17.3983	19.7997	19.4788	19.6385	17.4115	20.2348	20.556	19.3771
X224	GLHLPSFSPSPQ	22.2833	21.6832	21.1895	21.3007	12.9741	21.5676	21.2132	20.6617	20.9232	19.1805	19.7877	12.9494	12.9795	12.9742	12.8396	12.9845	20.8059	12.9591
X225	GLTETWNPNHP	14.6926	14.7947	15.4313	14.8272	15.045	14.4059	14.9279	15.3461	15.0367	15.4671	15.4379	15.4598	15.4548	15.4649	15.4626	19.5146	19.1439	19.2296
X226	GLTETWNPNHPEL	21.9824	21.5317	22.25	21.8159	19.4894	21.7169	21.7039	20.0046	20.1637	18.5256	18.5272	19.1657	19.7914	18.5389	19.1501	18.9331	19.1271	18.5845
X227	GNLELVGFKNEQQE	15.0705	15.0176	15.0884	15.0134	15.1838	15.0003	15.107	15.0762	15.0351	15.5822	15.1651	15.4849	15.1841	15.3485	16.1472	15.1833	15.1643	15.4033
X228	GTKPEYGSTNT	18.9192	21.4823	21.514	19.6585	18.7091	18.8281	18.8751	18.7297	18.5199	18.4761	18.3007	18.4417	18.4838	18.4979	18.2425	18.7319	18.4295	18.661
X229	GTKPEYGSTNTGSG	22.723	22.1176	21.6451	17.9889	18.1933	17.9844	18.91	17.965	17.8336	17.9194	18.3969	17.8005	17.3334	17.7291	17.5301	17.9807	17.4449	17.9476
X230	GVNAENNQR	15.4377	15.3367	15.2879	15.37	20.2589	15.2478	15.4469	15.4344	15.1401	15.451	20.4891	15.423	15.8199	15.337	15.8726	15.4439	15.2286	15.3475
X231	GVSSESEPF	14.9118	14.9389	15.1825	14.8806	15.1879	15.011	15.1909	15.192	15.1969	16.3512	17.0661	16.5785	15.1963	16.5137	15.7808	16.8706	16.1528	16.4701
X232	HAGDLGNINVGDDGTVS	18.858	17.2232	18.6351	15.7444	15.9385	15.9376	15.8615	15.9362	15.4312	15.8625	15.8666	15.7478	15.6259	15.6361	15.5526	15.9352	15.6814	15.8954
X233	HAIVKVSREQIEELR	14.9218	14.835	14.8662	14.9023	14.9095	14.4769	14.1901	14.9217	14.2688	14.919	14.9139	14.9166	17.878	14.9152	14.9171	18.2458	18.2534	18.9397
X234	HLPSFSPSP	21.181	21.0268	20.7674	21.0062	19.0618	21.3929	20.6402	14.4414	14.443	20.7934	20.6499	20.3617	20.1343	20.1847	14.4258	14.4439	14.3734	14.4195
X235	HLPSFSPSPQ	22.9717	22.6915	14.3952	23.1688	14.4227	22.7564	14.4006	14.4069	14.4043	21.4553	22.2047	14.4213	14.4026	14.4006	14.4231	12.5381	14.4119	14.2055
X236	IAGDSIGEEVEK	14.0248	13.7351	13.2958	14.1108	14.3505	13.5879	13.0407	14.3472	13.2861	18.2522	18.6032	16.8499	18.2836	14.3518	14.3613	16.568	16.7248	16.9404
X237	IAPVDTKPQTGGGY	15.2666	15.2161	15.0545	14.9872	23.8028	14.5773	15.3153	15.2293	14.7381	15.2948	25.2086	15.3158	15.3161	15.3122	15.3074	17.1019	16.7002	15.7782
X238	IESEGGLIET	17.0936	17.1802	20.372	17.19	17.1156	21.0047	19.7311	18.5526	20.1443	19.1292	17.191	19.5532	18.9957	19.3621	17.1864	20.3833	20.1282	20.0583
X239	IESEGGLIETWNPNN	18.2537	17.3259	12.7345	17.9883	15.225	18.7114	18.023	17.6271	18.2506	12.733	17.1925	12.7396	12.5228	12.7042	12.7389	11.7374	12.734	12.3282
X240	IESEGGLIETWNPNNR	15.1715	14.4756	14.1989	14.4677	18.3853	13.6821	14.461	14.4191	13.9256	14.4751	22.6544	14.4527	14.1395	14.3403	14.4656	14.2129	14.47	14.4311
X241	IKEGSLLLPN	21.58	22.0256	12.4213	12.4631	12.4229	17.8765	12.0734	12.4127	12.4355	11.5892	12.2736	12.2865	11.6805	11.4648	12.4722	12.4105	11.6123	12.4367
X242	INEGGLLLPH	23.3229	23.0633	22.5513	22.8082	20.5015	21.4663	22.693	21.4296	21.2597	18.4704	21.5898	18.4856	18.4817	18.4882	18.477	18.4887	18.5529	18.4691
X243	ISLTDTGSSNNQ	19.72	19.2697	15.0853	17.7553	18.953	16.2975	15.0913	17.5107	15.2102	15.0481	17.8799	14.9617	14.9842	14.9081	15.0787	14.559	14.7177	15.0776
X244	ISLTDTGSSNNQLDQMPR	19.1348	18.4315	16.8289	16.4303	19.4595	16.4489	16.427	17.9488	17.4295	16.4257	20.1391	16.4443	16.1042	16.3023	16.2413	16.3022	16.2922	16.4468
X245	KEDEDEDEE	12.8948	13.0594	13.11	13.1083	13.1198	16.5124	17.3893	11.4274	13.1278	15.7018	14.8409	16.3339	13.1241	15.8649	15.2723	13.1168	13.1162	15.8337
X246	KEDEDEDEEE	13.5268	14.059	12.7897	15.9647	14.0478	20.4488	14.0707	14.0729	14.0841	15.6405	15.1949	17.5189	17.3404	16.2416	16.3367	17.9656	16.4503	17.1204
X247	KEDEDEDEEEE	12.2605	13.7522	13.688	13.7695	13.7096	20.7511	18.4083	12.3343	13.7488	14.0668	13.0753	13.8836	13.7536	13.5778	13.7551	18.764	13.7471	13.779
X248	KEDEDEDEEEEE	13.8379	13.8538	14.9324	13.8615	13.8445	13.6985	13.8655	13.5669	13.587	14.1218	13.8324	15.7644	14.6944	14.4441	13.8641	16.7779	17.3372	17.4756
X249	KEDEDEDEEEEEE	17.4096	17.4047	17.4229	17.4041	17.4691	17.4145	17.4356	17.4551	17.435	17.4936	17.4856	17.4743	17.4937	17.483	17.4911	17.7146	17.6036	17.4938
X250	KEDEEKVVEEEEGE	19.0776	18.6142	19.4328	18.3681	17.5587	17.7257	17.7507	18.9005	17.5634	17.3495	17.5635	17.563	17.5541	17.4087	17.4939	17.5616	17.4793	17.5656
X251	KEDEEKVVEEEEGEW	20.4343	19.9923	20.6467	20.6386	17.6866	20.1712	20.1001	14.5293	14.5275	14.5298	17.7313	14.5194	14.419	14.2574	14.4968	14.4908	14.529	14.082
X252	KEDEEKVVEEEEGEWRGS	20.0368	19.3596	19.3335	15.4526	15.4493	15.3484	15.4665	15.4738	14.8122	15.4145	15.4511	15.3858	15.1262	15.092	14.9818	15.4589	14.8364	15.4435
X253	KEDEEKVVEEEEGEWRGSQ	21.2232	20.7413	20.0847	19.6134	18.0552	17.1418	18.8599	20.0485	17.8869	17.0946	17.1406	16.9986	16.87	16.9957	17.0335	17.1373	17.1161	17.1398
X254	KEEAWTLFEKHS	19.1201	19.3102	18.5339	19.5221	18.3547	19.1567	18.9882	19.0055	18.3319	21.5214	22.8006	21.7876	21.7088	21.7206	21.529	21.7188	22.0094	21.9501
X255	KELAFPGSAQEVDRLLENQKQS	14.1817	14.0632	14.1376	14.0306	14.298	14.2188	14.0763	14.4625	14.5753	15.8197	14.616	15.3011	14.622	16.2712	14.6321	14.6215	14.6364	14.6366
X256	KGVSSESEPF	15.0882	23.2733	23.3785	24.0632	23.229	15.035	23.9156	15.0689	23.8563	15.0819	14.9895	13.8349	14.0919	15.9196	15.1681	15.0191	14.3526	14.6042
X257	KGVSSESEPFNLR	13.9105	13.7524	13.8761	13.9542	14.7493	13.7145	13.8779	14.3866	13.954	15.2331	18.7948	14.9532	14.7595	14.7949	14.8925	14.5941	14.8691	14.6822
X258	KSKPHTIFLPQFTDADFILVVLSGK	14.033	14.0302	14.111	14.0227	14.2942	14.0426	14.1286	14.2263	14.1385	14.2951	14.2973	14.2891	14.2972	14.2922	14.291	15.1816	14.6979	14.4809
X259	KSLPSEFEP	17.8749	17.9273	18.2842	18.029	18.0387	17.7208	17.9756	18.2115	18.0646	18.2931	18.2833	18.2923	18.29	18.2946	18.275	20.3319	20.4048	20.5072
X260	KSLPSEFEPF	20.1537	20.1533	20.15	20.1587	20.153	20.1508	20.1443	20.2432	20.1886	20.5281	20.2744	20.2649	20.2736	20.2737	20.2743	20.2738	20.2711	20.2696
X261	KVLLEDQEQEPQ	17.9952	17.9221	17.2898	17.2846	17.218	17.2858	17.219	17.2886	17.1625	17.287	17.2775	17.2793	17.2819	17.1894	17.2171	17.2843	17.1694	17.2661
X262	KVVEEEEGEWRGSQ	17.7556	17.6266	17.6059	17.5872	17.5898	17.5825	17.5471	17.5841	17.5305	17.5712	17.5735	17.5665	17.6003	17.5554	17.5587	17.5941	17.5817	17.5585
X263	LAFPGSAQEVDRLLENQ	14.6002	14.3957	14.5317	14.5148	14.5014	14.6845	14.472	14.6971	14.6915	16.2518	14.6924	15.8634	15.5766	15.253	15.9493	14.6897	14.7187	14.6953
X264	LAFPGSAQEVDRLLENQK	15.0661	14.9016	14.8169	15.0749	15.0725	14.9386	14.7574	16.1959	15.0811	16.919	15.0836	16.1082	17.9401	16.4784	18.5629	15.373	15.7756	16.0673
X265	LAGEEDNVISQI	14.1778	13.9656	14.1439	14.1733	18.5193	14.6525	14.626	14.8939	14.1601	15.3479	14.1716	15.6287	16.0669	15.4975	15.6462	14.178	14.1555	14.1808
X266	LAGEEDNVISQIQRP	14.5454	14.5802	14.7413	14.5763	14.7636	14.7917	14.5761	14.6756	14.7937	15.9458	15.0462	16.6796	15.4244	15.2616	15.215	15.1448	15.1	15.2067
X267	LAGEEDNVISQIQRPV	14.3266	14.128	14.9743	15.0881	14.3357	17.0554	16.4899	14.3205	14.3284	17.3643	15.8672	17.1766	18.9276	17.3878	16.8718	16.7646	17.7031	17.3411
X268	LAGEEDNVISQIQRPVKEL	15.2375	15.4138	15.5421	15.3504	15.5879	15.2684	15.4156	15.7559	15.413	15.5833	15.5867	15.5723	15.9526	15.5883	15.5885	17.2386	16.2857	16.6769
X269	LANRDDNED	14.1645	14.6586	14.6143	14.5012	15.3554	14.9255	15.6497	16.3871	21.5356	15.6026	14.1873	15.4471	15.1895	15.6283	16.2037	15.9457	14.7395	14.7247
X270	LANRDDNEDL	20.3927	21.955	22.2494	22.2138	20.5226	20.5181	22.1021	20.523	23.585	20.5136	19.8159	20.0873	20.1594	20.5173	20.5167	20.4733	20.2336	20.1518
X271	LDALEPDNRIESEGG	17.2139	17.4102	17.1718	17.0272	16.5815	16.5836	16.5847	16.5797	16.428	16.5437	16.5404	16.5644	16.5596	16.5505	16.5096	16.5762	16.5472	16.5833
X272	LDALEPDNRIESEGGLIET	14.2472	14.1618	14.3376	14.17	14.42	13.7865	14.1067	14.1378	14.0079	14.4207	17.2449	14.4245	14.4094	14.4214	14.4233	16.4123	16.892	15.5463
X273	LEDQEQEPQH	20.3286	21.5923	21.2176	20.3327	20.3368	21.328	21.2449	20.1052	20.3379	20.2449	20.152	20.2535	20.2863	20.1893	20.1761	20.3262	19.8242	20.1146
X274	LEEQENEPH	17.7195	20.819	21.8343	21.09	17.7352	21.447	21.2946	20.9739	21.4785	20.4145	17.7263	20.6058	20.9632	20.644	20.5719	21.3583	21.3254	20.7771
X275	LEPDNRIESEGGL	20.9106	21.62	20.8145	21.5351	21.8749	17.3732	20.6975	17.3678	17.3731	17.1131	17.3732	17.286	16.7845	17.2935	17.3452	17.213	17.2617	17.3696
X276	LFENLQNYR	17.6405	17.4286	17.513	17.4731	17.8842	17.5604	17.6064	17.741	17.7883	17.9629	17.7685	17.969	17.9713	19.1185	18.9359	17.8696	17.9681	17.9659
X277	LGGNPETEFPETQEEQQGR	15.7964	15.7416	15.7192	15.7363	19.2646	15.2988	15.6913	15.6333	15.4295	15.7279	21.4991	15.7375	15.6525	15.5763	15.7229	15.7132	15.704	15.7204
X278	LHLPSFSPSP	14.7014	14.615	14.7739	14.7717	14.9632	14.8695	14.6982	14.7737	14.8625	15.0259	15.0209	15.8576	15.032	15.9998	15.0303	15.0303	14.9722	15.0067
X279	LIETWNPNN	19.5614	19.2973	19.1288	18.945	18.2374	18.3952	18.8852	18.24	18.2105	18.2378	18.2145	18.2146	18.0951	18.2236	18.1879	18.239	18.2298	18.2403
X280	LLEDQEQEPQH	21.0408	21.0659	20.5147	21.4919	16.3051	21.9007	21.1602	21.3692	21.1434	19.0907	16.3478	19.4197	19.0154	19.7938	19.5467	18.2722	18.1253	16.3649
X281	LLSGTQNQPS	21.6608	22.0068	21.8527	22.2982	20.7899	22.3516	22.1333	21.8017	21.5823	13.8086	20.4227	13.8197	20.3473	20.5419	13.813	13.7921	13.7786	13.7912
X282	LLSGTQNQPSFL	15.0463	14.6931	14.687	15.0516	21.1466	17.2299	15.7264	15.802	14.6698	17.7315	20.0288	18.2051	18.2078	18.0755	18.4254	18.007	17.778	18.4985
X283	LLSGTQNQPSFLSGFSK	16.362	16.2908	16.4345	16.4188	16.438	16.2361	16.3842	16.4422	16.1962	16.4433	17.8276	17.0735	17.198	17.1094	16.9351	17.9476	18.0726	17.645
X284	LNIGSSSSPDI	14.3701	15.3964	15.3755	21.0781	17.4905	21.9584	20.7177	15.388	21.074	15.3705	15.4344	15.8149	15.4591	15.3818	19.8831	14.8274	15.3866	14.438
X285	LPQFTDADF	12.0087	12.0255	12.0558	12.1019	12.0966	12.0166	11.9567	12.8149	12.3497	15.3628	12.9581	13.1644	13.159	13.5467	13.1577	13.1586	13.1603	13.8213
X286	LPSFSPSPQ	18.9829	18.8005	18.8654	18.869	18.8516	18.9007	18.8912	18.5981	18.7773	18.9826	18.9847	20.3096	18.9827	20.0286	20.1528	18.9808	19.7702	19.498
X287	NGDDVKSACCDTCLCTR	14.9411	14.8562	14.8873	14.9117	15.1348	14.7437	14.7924	14.9299	14.848	15.1407	16.5836	15.1399	15.0524	15.0917	15.0277	15.1911	15.7111	15.1403
X288	LSGTQNQPSFLSGFSK	12.7957	12.5561	12.9397	12.7714	13.5294	13.0777	12.7434	13.2283	13.1506	14.851	16.3298	16.3266	13.5314	16.5736	13.5793	13.5433	13.4966	13.5329
X289	LSPGDVFVIP	16.6955	16.5724	12.8057	12.8126	12.7699	12.7727	12.4525	14.032	12.8119	13.5524	13.6149	13.3202	13.5549	12.7422	12.776	12.7908	12.1611	12.8248
X290	LSPGDVFVIPAGHPV	15.7049	15.3084	15.3681	15.5788	15.4611	15.4495	15.0723	19.5919	15.7262	20.0475	15.7233	19.2434	18.9809	18.9982	19.4176	18.6013	18.6203	18.5739
X291	LSPGDVFVIPAGHPVA	14.4725	14.4687	14.3164	14.4729	13.8195	14.4409	14.4611	19.3769	18.3379	18.1972	14.474	16.6975	16.3274	16.6127	16.7771	16.4022	16.263	16.5949
X292	LSPGDVFVVPAGHPV	15.5785	15.4699	15.5366	15.5815	15.4836	15.5507	15.5828	15.5835	15.4927	17.6065	15.5838	17.0444	17.5523	17.166	17.3127	16.8536	17.0988	16.5545
X293	LSPGDVFVVPAGHPVA	15.3086	15.1787	15.3013	15.2938	15.3085	15.3077	15.2857	18.0592	16.5245	17.8098	16.8246	18.1288	18.3394	18.6201	17.9447	18.2093	17.993	17.9217
X294	LSPGDVFVVPAGHPVAI	16.3536	16.0307	16.2847	16.3187	16.1824	16.3042	15.9416	19.5402	16.3576	20.4553	16.3678	20.5575	20.0548	20.6273	20.6026	19.7455	19.7942	19.4365
X295	LSPGDVLVIPA	17.2536	17.2412	17.2545	17.2541	17.5965	17.2533	17.1454	18.0384	17.3552	17.8228	17.886	17.8645	18.0478	17.8201	17.7862	17.496	17.3904	17.2546
X296	LSPGDVLVIPAGHPV	16.4022	16.3455	16.2525	16.3978	16.3969	16.4104	16.2769	16.4092	16.4124	19.4486	19.2043	19.1294	18.4464	18.9961	18.5551	17.9246	18.7753	18.8079
X297	LSPGDVLVIPAGHPVA	16.6843	16.2857	16.3532	16.3534	16.3675	16.3614	16.3578	20.0293	18.4722	19.1476	19.6172	19.0778	18.8989	19.3491	19.3021	18.8492	18.8119	18.2612
X298	LSPGDVLVIPAGHPVAI	15.6741	15.3993	15.4855	15.6648	15.6743	15.6189	15.4308	17.8695	15.6746	20.0143	19.8221	19.7548	19.6072	19.9714	19.9567	19.1437	19.4579	18.8162
X299	LSPGDVLVIPAGHPVAIN	14.3772	14.3444	14.3663	14.4752	14.649	14.3935	14.5723	14.9826	14.5798	16.8052	18.7601	15.1147	15.0006	15.229	15.6198	14.9667	14.6495	15.5069
X300	LSPGDVVIIPA	15.9383	15.7677	15.7353	15.9467	16.6304	15.9276	15.7437	16.5194	15.9481	18.6581	19.8499	17.3711	18.1112	17.0949	17.6351	16.7032	16.6076	17.5046
X301	LSPGDVVIIPAGHPV	16.659	16.0534	15.948	15.9432	16.859	16.5628	15.6557	18.7701	15.9888	19.8276	20.4269	21.0715	21.3837	15.9407	21.3372	20.8728	20.9275	21.1051
X302	LSPGDVVIIPAGHPVAI	8.811	8.40277	8.51945	8.47407	9.08473	8.77464	8.66638	9.15532	9.84138	9.87677	9.16623	9.89481	9.45649	12.6731	9.89636	9.55536	9.89536	9.36864
X303	LSPGDVVIIPAGHPVS	15.9336	13.9057	13.5672	13.9487	16.9084	15.3829	13.9637	13.9761	13.5166	17.1826	19.9582	13.9967	18.187	13.9752	18.5799	13.9166	13.9971	13.7284
X304	LSPGDVVIIPAGHPVSI	14.67	14.5075	14.3787	14.6856	14.661	14.5883	14.4147	17.1768	14.6887	19.0549	20.7056	19.3472	19.03	18.6381	19.2555	18.8811	19.1577	19.0326
X305	LSPGDVVIIPAGHPVSIS	14.9249	14.716	15.0214	14.8474	15.011	14.4147	14.9842	15.6997	15.0071	17.5265	18.9564	17.7555	15.0248	17.8571	16.1556	18.0338	17.9366	18.0666
X306	LSPGDVVIIPAGHPVSISA	12.8112	12.7636	12.7509	12.8365	13.1954	12.7365	12.7592	13.1921	12.9641	13.2022	14.2266	13.1964	13.1957	13.8124	13.1926	13.1013	13.2231	13.5834
X307	LSPGDVVIIPAGHPVSISAS	13.7989	13.7509	13.6611	14.0604	14.0465	13.6482	13.6445	13.7071	13.6707	14.1158	14.929	14.3334	14.0581	14.2842	14.0627	14.0613	14.9894	15.2237
X308	LSPGDVVIIPAGHPVSISASSNL	17.1059	17.0098	17.1075	17.0643	17.1082	17.0297	17.0867	17.0888	17.0833	17.1095	17.2167	17.7326	17.3437	18.1304	17.983	17.8585	17.9673	18.0297
X309	LSPGDVVIIPAGHPVSISASSNLN	13.2401	13.3468	13.4567	13.2812	13.4575	13.2908	13.405	13.4274	13.3057	13.4594	13.4438	13.9041	13.4133	13.771	13.6416	14.2541	13.4607	14.2285
X310	LTDTGSSNNQLDQMPR	18.5103	18.1537	18.1958	14.0131	16.8059	17.1381	17.4469	18.2746	17.7374	14.0556	18.256	17.0107	13.9181	17.3254	13.9961	17.7783	17.635	17.1915
X311	LTETWNPNHP	17.7155	17.7089	17.9769	17.7219	17.8295	17.5681	17.8722	17.9758	17.8869	18.3231	18.1949	18.1845	17.9774	18.3022	17.998	20.4846	20.4153	19.7712
X312	LTETWNPNHPE	22.0308	21.9637	21.9808	21.6896	19.4309	21.6021	21.3067	21.7634	22.1129	20.9636	17.7294	21.0141	21.4814	21.2918	20.6354	22.3154	22.3338	21.5047
X313	LTETWNPNHPEL	19.4104	21.429	21.6555	19.4352	21.5335	21.8059	22.0576	19.8072	20.4106	19.4126	19.4008	19.435	20.2235	19.3604	19.644	19.4324	18.3142	18.8805
X314	LTFPGSAQE	23.0318	22.4964	22.6262	17.056	21.219	17.0764	17.1386	17.1245	16.8693	21.1661	21.5211	21.1035	20.8828	21.0137	20.6588	22.2431	17.1516	21.3555
X315	LTGSDDNVISQ	20.254	20.3075	16.5421	16.561	16.5172	18.7149	16.5557	16.5118	16.5167	16.2286	16.5469	16.4606	16.1618	16.1108	16.4972	16.5301	16.1005	16.5269
X316	LVDMVQLLVMNGASVLDMH	15.1046	14.9039	15.0945	14.9949	15.1061	15.0924	15.1031	15.1076	14.9776	17.4388	15.706	17.8177	17.2548	17.7094	18.0096	17.1656	17.0435	16.9799
X317	LVNEGKGNLELVGF	13.3085	13.0423	13.3078	13.1354	13.2986	13.3012	13.2624	13.3046	12.988	17.4414	13.3084	18.3995	17.6783	18.1878	17.8233	17.5772	16.8089	17.6972
X318	LVNEGKGNLELVGFKNEQQE	13.2256	13.2443	13.7584	12.5213	13.4085	13.8519	13.1792	13.9828	13.9712	17.5226	14.0249	17.744	14.0003	17.9399	14.0529	16.4569	14.0266	14.0214
X319	LVNEGKGNLELVGFKNEQQEREDN	15.7526	15.6009	15.4218	15.4278	15.9817	15.9213	15.9947	16.0035	17.9087	16.0004	15.7205	15.9988	16.0041	18.1263	15.993	15.8182	15.9966	15.3497
X320	LVNPDDEEDL	22.7849	22.4016	22.6097	22.7556	21.5028	23.0475	22.9565	12.8603	14.6805	21.8245	14.6701	22.1678	14.6756	21.9763	21.9159	14.6684	21.4551	21.1785
X321	LVNPDDEEDLRVV	19.7835	19.7232	19.6607	19.8313	19.753	19.8362	19.6187	19.8786	19.6561	19.9528	19.8289	20.1015	20.4901	19.9488	19.9515	19.8589	19.9098	19.8952
X322	LVNPDDEEDLRVVD	17.4592	17.4231	16.9189	17.3339	19.2854	15.8642	16.2145	15.8637	15.5349	15.8073	15.8622	15.8501	15.8269	15.6651	15.8171	15.7623	15.7131	15.8537
X323	LVNPDDEEDLRVVDF	15.0572	15.038	15.2544	15.1049	19.5839	14.7116	15.1998	15.255	14.7762	16.8425	21.4352	16.6475	15.2561	16.4836	15.3197	17.1832	15.705	17.7539
X324	NAAWDPSNKE	15.0449	20.0777	15.0475	20.6419	15.0306	20.6058	20.5016	15.0435	20.3728	14.7951	15.0455	14.5827	15.0229	14.3216	15.044	15.0291	15.0306	14.272
X325	NALEPDHRVESEA	20.3253	19.7104	20.3378	20.3641	14.173	19.0911	19.6719	14.1738	14.1726	13.9542	14.0848	14.1675	14.1307	13.7507	13.8731	13.7995	14.1714	13.73
X326	NASSDLNLIGF	14.8972	14.8692	14.8835	14.8667	16.5667	14.9024	14.8848	14.9044	14.8854	15.6298	16.0216	15.8517	15.5994	15.7772	15.7023	15.073	15.0271	15.3051
X327	NASSDLNLIGFGINAK	13.8078	13.4316	13.8116	13.4541	13.2723	13.8058	13.7885	13.8638	13.8435	17.613	13.8526	15.7471	15.3023	15.8823	15.865	16.0273	16.081	13.8723
X328	NASSDLNLIGFGINAKNNQ	13.6118	13.45	13.2094	13.6144	13.3551	13.396	13.355	13.2707	13.433	13.6116	13.5251	13.621	13.599	13.6104	13.6176	13.6206	14.7635	14.2345
X329	NDDEGSEPRVPG	17.1421	20.6591	20.4674	19.9177	17.1172	17.1453	17.1207	17.7161	16.8739	16.6538	16.6988	16.7883	16.8601	16.8755	16.5513	17.144	17.0104	17.1334
X330	NDDEGSEPRVPGQRE	18.6988	20.6892	19.8434	18.7009	18.3148	18.639	18.694	18.1769	18.2144	18.1403	18.1272	18.0603	18.0891	18.0533	17.9398	18.2395	17.8919	18.131
X331	NEDVIVKVSREQIEELSK	15.4841	15.445	15.5605	15.4201	15.721	15.5077	15.5729	15.6958	15.7141	15.7199	15.6746	15.7213	15.7213	16.2789	15.9051	16.2516	15.8639	15.7173
X332	NEDVIVKVSREQIEELSKNA	14.7254	13.8147	14.037	13.9281	14.085	13.6509	13.855	13.7704	14.0818	19.3144	14.0863	19.4619	14.0877	19.7016	19.6264	16.532	20.3439	20.5278
X333	NEDVIVKVSREQIEELSKNAK	17.3304	17.1968	17.0151	17.4215	17.2472	17.3917	16.8984	17.7307	17.0635	17.8606	17.4279	17.859	19.2001	17.8015	17.861	17.5009	17.707	17.57
X334	NEGGLLLPH	21.7615	21.8502	17.9157	17.7853	17.663	17.9083	17.1807	17.8941	17.5627	18.9376	17.8822	18.7254	19.0415	17.9228	17.9198	19.1815	17.9162	19.2945
X335	NEGKGDFELVGQ	18.4933	18.4005	18.4873	18.427	18.4527	18.5572	18.4282	18.5729	18.5718	19.4854	18.5724	19.2402	18.9241	18.9944	19.1609	18.6507	18.5734	18.5906
X336	NEGKGDFELVGQRNENQQEQ	15.4504	15.373	15.4904	15.4268	15.5711	15.543	15.4676	15.421	15.4617	15.6185	15.6184	16.3939	15.624	16.3882	16.0241	15.6208	15.6224	15.6216
X337	NFLAGEEDNV	19.5258	19.2721	19.1172	19.0649	16.6675	19.0006	18.8809	16.656	19.2775	17.2078	16.3482	17.5951	17.1207	17.5853	17.054	16.3777	16.6507	16.4516
X338	NFLAGEEDNVI	13.2285	12.6617	13.623	12.941	13.5983	13.5639	13.5945	13.0171	13.0657	13.6329	13.6353	17.5129	16.8352	17.1761	16.9786	16.4355	16.3536	13.6351
X339	NFLAGEEDNVISQ	20.1192	19.8894	19.9368	20.0716	20.5022	20.1625	20.2161	18.7266	18.7607	19.1925	20.5419	18.9224	18.9284	19.1188	19.6103	18.8893	18.8759	18.7704
X340	NFLAGEEDNVISQI	16.2952	16.1718	16.1919	16.2554	19.3822	16.2964	16.2939	17.3857	16.429	17.7939	20.6204	17.5861	16.9001	17.5609	17.6015	16.4437	16.299	16.368
X341	NFLAGEEDNVISQIQRP	15.97	15.8131	15.9267	16.0156	16.7198	15.7982	15.9314	16.4126	16.011	17.2704	20.4555	16.9256	16.7643	16.7735	16.8685	16.5896	16.8243	16.6882
X342	NFLAGEEDNVISQIQRPV	17.0355	16.6881	15.9696	15.9158	15.8253	15.9825	15.8293	19.071	17.6456	19.6904	15.9967	19.7927	19.5642	19.5704	19.7243	19.4102	19.54	18.8762
X343	NFLAGEEDNVISQIQRPVK	17.9645	17.4327	17.5463	17.8267	17.9776	17.4703	17.6462	18.5123	17.9693	21.0228	23.6899	20.6561	18.8924	21.4068	21.0474	17.981	20.431	20.0212
X344	NFLAGEEDNVISQIQRPVKE	15.401	15.1451	15.246	15.2407	15.4041	14.8873	15.2129	17.3379	15.6754	17.5098	17.2936	17.1226	15.407	17.45	16.5579	17.126	17.4191	17.2416
X345	NFLAGEEDNVISQIQRPVKEL	17.7818	17.5281	17.6204	17.7246	17.786	17.7155	17.4647	20.1547	17.7863	21.1041	19.106	20.9253	20.7853	21.0852	21.0332	20.0482	20.333	20.1756
X346	NFLTGSDDNVISQ	17.8355	16.0356	17.2656	17.2263	19.5561	16.8976	17.056	15.994	15.9717	17.0875	18.3197	16.8545	15.9922	16.7946	16.0337	16.0417	16.0363	16.8751
X347	NFLTGSDDNVISQIENPV	13.5476	13.3055	13.3348	13.4784	13.8232	13.6334	13.3272	13.8359	13.5442	15.3247	17.0406	15.0486	15.3223	14.0542	15.0789	13.8323	13.8343	13.8331
X348	NFLTGSDDNVISQIENPVK	13.1299	12.6816	12.8845	13.1291	14.3362	12.8547	12.8571	14.2005	13.3597	14.3303	20.1117	15.0417	15.2665	14.4219	15.1057	14.3134	14.3222	14.0548
X349	NFLTGSDDNVISQIENPVKEL	16.4563	16.2621	16.3212	16.3646	16.4522	16.4536	16.3595	16.4566	16.3088	18.0036	19.0947	18.058	18.2067	17.6876	18.3773	17.6385	17.7255	17.2855
X350	NGLHLPSFSPSP	18.5669	18.2837	16.1214	16.1519	18.2593	18.0643	16.14	16.129	17.2944	16.1115	16.1382	16.4589	17.4387	16.5973	17.13	18.0566	18.1427	16.6341
X351	NGLHLPSFSPSPQ	20.4432	19.8406	19.0973	19.5576	16.5797	19.4814	19.2753	19.3378	19.3982	16.5969	19.6085	17.5579	18.0589	17.5916	17.434	18.07	18.5107	17.5236
X352	NIGSSSSPDIYNP	16.5206	17.4246	17.8153	17.3495	16.7888	16.5202	16.6226	16.5131	16.2971	16.4356	16.4978	16.4438	16.4835	16.5045	16.3249	16.5162	16.4362	16.5197
X353	NILEAAFNTEY	13.2794	13.2839	13.262	13.3092	13.3632	13.2902	13.2393	13.459	13.3385	13.8592	13.4584	13.4649	13.8425	13.7167	13.4653	13.4329	13.4647	13.442
X354	NILEAAFNTEYEEIEK	16.5103	16.462	16.5029	16.3463	17.1961	16.2396	16.3032	18.081	16.989	16.6979	17.8037	17.4716	16.7261	16.9207	17.2182	16.67	16.6506	16.5103
X355	NILEAAFNTEYEEIEKV	16.7212	15.3126	14.708	11.6645	11.6847	11.6723	11.152	17.802	11.6377	19.956	15.3622	19.8388	19.8366	20.0748	20.1864	19.7987	19.6844	19.7432
X356	NILEAAFNTEYEEIEKVL	14.2069	14.0333	14.1195	14.2001	14.2064	14.2015	14.1182	14.2019	13.8988	17.6625	16.2944	18.2811	18.2056	18.2873	18.6169	16.8487	17.5757	17.8175
X357	NILEAAFNTEYEEIEKVLL	16.3839	16.3452	16.5768	16.5445	16.5175	16.604	16.38	16.4518	16.0893	16.6144	16.6221	18.4514	18.2887	16.6191	17.9603	17.3235	17.3662	17.5272
X358	NILEAAFNTEYEEIEKVLLEEQEQ	13.4599	13.312	13.4589	13.3923	13.4353	13.4371	13.2763	13.451	13.1199	15.6349	13.4568	16.9031	16.5991	15.5208	16.2255	16.0485	15.3251	15.6988
X359	NILEAAFNTEYEEIEKVLLEEQEQK	19.0487	18.8889	18.996	18.981	19.1425	19.1372	19.0308	19.1004	18.9509	19.1423	19.9234	20.4848	19.9484	20.2364	20.438	19.1445	19.4743	19.4658
X360	NLERGDTIKLPAGT	21.5612	21.4931	21.3173	20.9043	20.1484	20.1304	14.4783	14.4741	14.4136	13.1997	14.4644	14.4659	13.4318	13.5232	12.8502	14.4506	14.1168	14.0932
X361	NLERGDTIKLPAGTI	13.0715	14.9273	20.2017	20.5149	18.5218	14.9264	20.3985	14.9257	14.8954	19.5222	14.9316	18.9912	21.6219	19.4297	17.9885	19.9233	20.3809	19.0214
X362	NLERGDTIKLPAGTIA	18.1601	18.3045	18.3986	18.2445	18.4153	18.1692	18.0898	18.4707	18.2688	19.2808	18.4791	18.4914	20.1746	18.4864	18.4915	21.1004	20.2119	20.7341
X363	NLERGDTIKLPAGTIAYL	18.4524	18.5539	18.6139	18.7699	18.7872	18.3798	18.4557	18.7833	18.6783	20.3183	20.9079	20.165	18.9684	20.0438	18.7881	19.659	19.8756	21.3016
X364	NLLGFGINAENNER	15.6202	15.2067	15.2903	15.624	18.6564	15.5561	15.6074	15.5812	15.213	15.6553	15.5996	16.2316	17.0225	16.2278	16.7513	15.6252	16.3919	15.6268
X365	NLLGFGINAENNERNFL	13.1792	13.1613	13.571	13.072	13.4602	13.2473	13.3441	13.211	13.331	13.7082	13.4222	15.0302	13.5838	13.5874	14.41	14.7491	14.207	13.5874
X366	NNPGQLESFLLSGTQNQPS	15.3859	15.4838	15.537	15.4296	15.5342	15.4101	15.4157	16.0869	15.5377	16.4038	15.5367	15.7782	16.2746	16.0601	16.2823	16.4978	15.5367	16.3839
X367	NNPGQLESFLLSGTQNQPSFL	13.6047	13.4801	13.5106	13.4996	13.5801	13.5751	13.5396	13.6932	13.5246	14.3219	13.6969	13.6971	14.681	13.8147	13.9371	14.8525	14.8245	13.6869
X368	NRPGEPQSFLLSGNQNQPS	14.9255	14.873	14.8965	14.8812	14.9924	14.8964	14.917	14.9508	14.9338	15.003	14.962	15.005	15.0053	15.3	15.3528	14.9804	15.0052	15.0038
X369	NRPGQLQSFLLSGTQNQPS	13.4863	12.9754	12.8024	13.2513	13.1318	13.1195	12.9402	12.847	12.7854	13.4895	13.2442	13.5633	15.0295	13.499	15.2873	13.4851	15.3495	13.4935
X370	NSFNLERGDTIKLPAGTI	16.5756	16.4064	16.5018	16.4772	17.0849	16.4837	16.558	16.6136	16.3942	17.0924	16.6401	17.0453	17.093	17.0878	18.5025	16.7127	16.7342	16.9525
X371	NTDYEEIEK	14.5451	21.6957	22.4323	22.2765	21.4371	23.1792	22.2735	14.5139	22.9186	23.0715	14.6607	14.9501	22.9543	14.8579	23.1538	14.5481	14.5746	14.8799
X372	NTDYEEIEKV	17.8021	18.1868	17.7996	17.7841	18.7437	17.1851	17.2038	20.1239	17.795	17.7939	17.7963	18.825	18.8073	18.4549	17.7889	18.5323	18.2317	18.4762
X373	NTEYEEIEKV	18.9097	19.3893	18.8984	21.1757	19.8184	21.0413	21.613	18.5955	18.8878	18.9064	18.8658	19.6657	19.3633	19.2798	18.8752	18.8327	18.7492	18.7059
X374	NTEYEEIEKVLLEEQEQK	16.4836	16.4608	16.7159	16.5064	19.053	16.6681	16.5623	16.5947	16.7185	18.0798	16.7187	18.7509	17.0715	18.4276	17.5996	17.317	16.7329	18.31
X375	NTEYEEIEKVLLEEQEQKS	13.357	13.3036	13.2654	13.5499	13.5907	13.3573	13.227	13.556	13.8758	15.7278	14.9326	15.5852	13.8775	16.2559	13.8764	13.8781	15.0871	16.1731
X376	NTNYEEIEK	14.4269	15.2617	14.501	16.8134	14.8745	20.5804	16.8059	14.4077	15.0554	15.2452	14.5904	15.9348	15.9311	15.521	15.7945	16.9672	15.4903	15.5817
X377	PHMPSSSSN	15.3802	14.9189	15.1663	15.4205	22.1726	15.4677	15.4576	15.0702	14.4879	15.4492	15.4675	16.3776	15.4638	15.4715	15.9918	14.9466	14.652	15.2366
X378	PSFSPSPQL	14.8297	14.9711	14.9377	14.9412	22.3194	14.9728	15.556	19.3734	20.1245	14.7475	19.0292	14.9351	14.8817	14.9648	14.9561	14.9678	14.1777	14.5682
X379	QEEETSTQVQR	14.3893	14.2973	14.2892	14.3125	18.6051	14.2077	14.3865	14.3351	14.1201	14.3803	18.466	14.3915	14.3627	14.212	14.3853	14.3873	14.2355	14.2001
X380	QEEKEEEEEEK	15.2678	15.2223	15.4482	15.2692	15.2971	15.1838	15.1407	15.2826	15.0569	15.4616	15.4493	16.2601	16.8521	15.4651	15.5192	17.6346	17.6365	17.2728
X381	QTLYENENGHI	23.2441	23.2737	23.2714	23.2684	23.3019	23.2836	23.3244	23.3519	23.609	23.3148	23.2453	23.3073	23.297	23.3183	23.3462	23.3305	23.2748	23.2719
X382	QTLYENENGHIR	16.08	15.3377	15.289	15.646	15.785	15.253	15.0137	16.0641	15.7646	18.9754	22.2273	16.7923	16.118	17.187	16.1184	16.1004	19.9506	16.1169
X383	QVEEQTEEKD	17.9548	20.3166	20.4222	17.9543	17.9527	17.9578	19.6648	20.6436	20.4852	17.9138	17.8957	17.9406	17.4515	17.8521	17.9461	17.9553	17.3818	17.6404
X384	QWRPSHGKEEDEEEKEQ	14.9236	15.2856	15.4028	15.1898	16.041	15.0082	15.1959	15.7543	15.1707	16.1752	16.048	16.1746	16.1241	16.1578	15.9731	17.7727	16.1781	18.5943
X385	REESDEEEEQEEE	17.2573	18.4267	18.4364	17.4729	17.1552	17.1988	17.2618	17.1994	17.1261	16.9955	16.9533	16.9727	16.9929	16.9829	16.8894	17.1324	16.9552	17.0711
X386	SACCDTCLCTR	15.3596	15.1525	15.9705	14.9261	15.5177	14.9306	15.3448	15.2818	15.2219	15.9586	15.9438	18.5422	15.9669	15.9574	15.9721	20.8128	20.1272	19.2345
X387	RPSHGKEEDEEEKEQ	12.654	12.4813	12.4253	12.5191	12.3072	12.2608	12.5941	12.7154	12.6423	13.9196	12.7164	12.9231	13.3061	12.7189	14.0801	15.1299	15.8809	14.8605
X388	RQQSQEENVIVK	15.6939	15.8025	15.6297	15.8927	19.5629	15.9765	15.8679	15.9834	15.8741	17.0979	15.9988	15.9981	17.5165	15.996	16.0983	15.9872	15.998	15.546
X389	RSDQENPFIFKSNRFQTLY	18.2477	18.1055	18.1917	18.2537	18.2579	18.2529	18.1619	18.2536	18.2038	19.9837	18.2582	18.9814	19.9536	20.3982	19.4046	19.541	20.1523	19.8257
X390	RSDQENPFIFKSNRFQTLYE	16.5231	16.3314	16.3777	16.5835	16.5829	16.1917	16.3187	16.5849	16.3428	16.585	17.2018	17.0582	17.1076	17.9102	17.0743	18.1567	19.1351	19.0783
X391	SATTGAEFAAHEVHSWSF	12.4991	12.004	12.2562	12.0582	12.5589	12.2214	12.678	12.6359	12.3607	13.9801	13.9783	13.6363	14.0085	13.9337	13.9816	18.5439	18.6725	13.9992
X392	SDLFENLQN	16.4846	16.17	16.5435	15.4566	19.4653	15.8599	15.3625	15.2398	15.2639	17.422	15.3172	17.2815	15.3145	15.3121	15.2897	17.175	16.7889	17.8826
X393	SDLFENLQNY	14.8806	14.5174	14.7691	14.7957	18.2642	14.9056	14.9356	14.7563	14.3797	14.9229	14.9421	16.5908	14.9361	16.2502	16.4067	14.9242	14.6429	15.4242
X394	SDQDNPFIFES	15.4199	15.5279	15.5909	15.556	15.6267	15.6259	15.5601	15.6294	16.1921	16.4855	15.6275	16.832	15.6269	16.8571	15.629	15.6235	15.6283	16.4413
X395	SDQDNPFIFESK	17.5354	16.9571	17.2303	17.0788	19.8763	18.2347	17.3808	14.123	13.8227	14.0944	15.1359	20.4348	20.7046	20.5579	20.501	14.0351	14.1186	14.1348
X396	SDQENPFIF	14.1982	13.978	14.1062	14.1446	18.5198	14.3194	14.2499	14.3068	13.9764	15.3311	15.9594	15.692	15.112	14.7024	15.3996	14.3178	14.1912	14.3294
X397	SDQENPFIFK	17.4303	17.3877	17.4521	17.436	17.6684	17.4071	17.4278	17.6272	17.4738	17.6672	18.5387	17.9108	17.6687	18.0156	17.6634	17.6642	17.6623	17.6581
X398	SFLLSGTQNQPSFL	13.6076	13.5773	13.6726	13.5758	13.6707	13.6847	13.6316	13.6326	13.6611	14.1381	13.7719	14.4144	13.773	14.1468	14.0974	13.7661	13.7732	13.7693
X399	SFNTGYEEIE	19.4524	19.3201	19.023	19.0325	18.0688	19.0976	18.0268	18.026	17.7984	18.0225	17.9657	18.024	17.9709	17.95	17.8928	18.0184	18.022	18.0013
X400	SFNTGYEEIEK	23.2	22.8367	23.2212	22.9565	20.0725	19.7451	22.9789	22.8666	22.9819	19.7517	20.6195	19.7031	21.0782	21.5085	21.3821	21.9274	21.471	22.1301
X401	SFNTGYEEIEKV	19.9934	19.8714	20.2112	21.02	17.2719	20.735	21.2164	15.4728	15.4321	20.8489	15.4816	20.3274	20.8156	15.4054	20.6371	19.6572	19.3213	19.6273
X402	SGFSKNILEAAFNTEYEEIEKV	15.3883	15.2538	15.4172	15.2485	15.4184	15.2815	15.3681	15.2103	15.332	15.7806	15.4177	16.6824	15.4184	16.354	16.4932	16.168	16.4492	16.4077
X403	SILEAAFNTDYEEIEK	16.0196	16.0184	15.9947	15.9698	18.1188	15.8274	16.0142	17.5391	17.0191	16.3487	18.5811	16.4357	16.0633	16.3632	16.6673	16.7758	16.022	16.3301
X404	SILEAAFNTDYEEIEKV	17.3881	17.3389	17.3696	17.3869	17.3844	17.2939	17.2197	19.2411	17.8439	18.9413	17.3877	18.6783	18.7981	18.6565	18.9796	19.0477	18.8536	19.1772
X405	SILEAAFNTDYEEIEKVL	14.5357	12.6561	12.6561	12.3397	12.6165	12.6536	11.933	12.647	11.8388	18.1938	16.1038	18.5042	18.6744	18.5985	18.9356	18.8965	18.2238	18.6065
X406	SILEAAFNTDYEEIEKVLL	15.7412	15.4968	15.7376	15.6511	15.7405	15.7369	15.6325	15.7344	15.4683	17.0863	17.1224	18.7302	18.2186	18.4311	18.4866	17.4017	17.5711	17.6794
X407	SILEAAFNTDYEEIEKVLLEDQEQE	10.9002	10.4177	10.2666	10.7764	10.8045	10.4832	10.4587	10.5459	10.6626	10.8961	10.7579	10.9004	10.8965	12.231	12.3745	10.8978	12.6646	11.7523
X408	SKIFENLQN	15.044	14.82	20.0978	14.987	15.0046	15.0139	19.988	15.0184	15.0193	15.0376	14.5479	19.3268	18.9919	19.6873	15.0393	20.0571	19.707	20.4411
X409	SKIFENLQNY	19.233	19.2642	19.2979	19.235	19.2036	19.2548	19.3102	19.5817	19.3494	20.4786	19.5131	19.5825	19.5792	19.5808	19.5817	19.9606	19.674	19.5817
X410	SKIFENLQNYRLL	13.7538	13.6359	13.6482	13.7133	13.9018	13.5343	13.525	13.8421	13.6981	14.3839	15.6341	14.07	14.0993	13.9058	13.8964	13.9034	14.6597	13.9868
X411	SKIFENLQNYRLLEYK	14.7511	14.6925	14.7943	14.6768	14.8991	14.9002	14.6717	14.8242	14.9063	16.1548	15.763	16.2257	14.9044	16.2145	14.9024	14.903	14.8511	14.9065
X412	SKPHTIFLPQFTDADF	14.4902	14.5048	14.5521	14.5739	14.6146	14.4242	14.2988	14.6178	14.3734	16.095	14.8825	15.0688	15.912	15.0789	15.5149	15.1513	14.6167	14.9531
X413	SKPHTIFLPQFTDADFILVVLSGK	13.1995	13.2118	13.2059	13.2393	13.2833	13.3088	13.0727	13.3112	13.2195	14.5024	13.8789	14.2955	14.6455	14.113	13.3123	13.3095	13.3132	13.301
X414	SKPHTIFLPQQTDADFILVVLSGK	13.5498	13.5249	13.6854	13.8458	13.8846	13.9495	13.5053	13.6506	13.507	13.991	13.6866	15.0961	14.8763	14.4186	13.9846	13.9841	13.9733	13.9831
X415	SLNTKYDTIEKVLL	16.8674	16.855	16.8563	16.8591	16.9147	16.8572	16.8568	16.9088	16.8879	16.9842	16.9192	16.9297	16.9442	17.1089	17.035	16.9205	16.9296	17.0103
X416	SLNTKYDTIEKVLLEEQENEPH	17.5012	17.2168	17.2155	17.2535	17.3213	17.2883	17.2643	17.4735	17.4998	17.6036	17.5008	17.6732	17.502	18.6541	17.5014	17.8487	18.3602	17.7424
X417	SLNTKYDTIEKVLLEEQENEPHQ	15.1185	14.31	14.4594	14.5274	14.5045	14.7531	14.5501	13.9243	14.6104	15.1272	14.9556	17.7654	15.1259	17.4632	17.1712	15.1259	18.0167	15.1208
X418	SLPSEFEPF	20.5102	20.0272	20.0767	20.5166	10.1315	20.9408	20.4308	20.463	20.7561	10.1482	10.1531	19.8711	10.1435	10.1589	19.6083	10.1368	10.04	10.1068
X419	SLTDTGSSNNQLDQM	17.4202	16.5412	16.2081	16.165	16.2088	16.1525	15.9245	16.2061	15.8645	16.0684	16.1937	16.0541	16.2079	15.961	15.9999	16.1911	16.1165	15.9874
X420	SLTDTGSSNNQLDQMP	14.7482	14.7529	14.5436	14.4278	14.7629	14.5383	14.6758	17.5719	17.3171	14.756	15.6478	15.4531	14.654	14.763	14.7586	14.7567	14.6424	14.6487
X421	SNKFLTLFENENGHIR	16.4131	16.5444	16.6197	16.498	16.8364	16.4198	16.4305	16.8389	16.3672	17.1187	17.0512	16.8392	18.112	17.0243	17.2817	18.3423	17.3889	18.1706
X422	SNRFQTLYENENGHI	15.76	15.4935	15.5819	15.7333	15.6545	15.6623	15.5921	17.915	18.0435	19.361	15.681	19.1749	19.4802	20.3553	21.2299	15.755	17.3082	18.3877
X423	SNRFQTLYENENGHIR	18.5633	18.4338	18.5219	18.4708	18.5454	18.5941	18.4868	18.786	18.669	20.0375	18.7881	19.4752	19.0421	19.5588	19.617	18.7818	18.7863	18.7805
X424	SNRFQTLYENENGHIRLL	14.0299	13.9973	14.1324	14.0083	14.1029	14.1035	14.0548	14.0422	14.0508	14.4351	14.1812	15.1844	14.4365	14.4369	14.7864	14.4334	14.4214	14.4343
X425	SPGDVLVIPAGHPVAI	11.8786	11.7592	11.8476	11.9093	12.5696	11.7392	11.8911	12.425	12.081	12.5752	15.3733	12.5756	12.4126	13.0922	12.5431	12.3661	12.5683	12.5711
X426	SRNPIYSNKFGKF	14.4126	14.2851	14.2013	14.4138	14.4178	13.9998	14.418	14.4152	13.4324	14.4089	14.0009	14.4146	18.9523	14.4008	19.201	18.157	18.4287	18.5572
X427	SRQEEDEDEDEKEE	23.422	19.4211	19.5526	19.1325	16.8446	18.4045	16.8428	16.8473	15.1588	16.7699	16.3772	16.816	16.8472	16.4535	16.3487	19.738	18.9569	16.8393
X428	SRSDQDNPFIFES	13.7091	13.1819	13.3238	13.4176	13.989	13.9835	13.1315	13.984	12.7963	13.9907	13.9873	17.4965	18.1114	17.8948	18.2923	13.7455	13.9918	13.9836
X429	SRSDQDNPFIFESK	15.7701	15.5316	15.3725	15.9067	15.8632	14.9567	15.1654	20.9346	15.8749	15.9036	21.0797	18.0498	20.2011	20.7283	18.8155	18.6688	18.5198	18.8603
X430	SRSDQDNPFIFESKR	13.7313	14.0571	14.2323	13.9335	14.483	13.8226	14.0533	14.6011	13.9707	14.7591	14.5435	14.7708	14.7267	14.7376	14.6384	16.5088	14.7667	16.5868
X431	SRSDQENPFIFKSNRFQTLY	15.9237	15.7901	15.7399	15.7855	15.8326	15.8091	15.7591	15.9097	15.9364	16.2984	15.946	15.952	15.9487	16.5711	15.9513	15.9478	16.278	15.953
X432	SVEIKEGSLLLPN	17.252	17.1247	16.6331	16.3899	14.9685	16.1947	16.0609	14.9619	14.9499	14.9655	14.5467	14.9625	17.5715	14.9417	17.1753	14.9309	14.954	14.9423
X433	SVEIKEGSLLLPNYNS	16.4195	14.7622	14.681	14.7814	16.7357	14.7811	14.7795	19.1253	17.0108	18.1121	14.7838	19.1942	18.9462	19.3049	20.1115	17.7574	18.6208	18.9001
X434	SVEINEGGLLLPH	21.2544	20.639	19.3568	19.9299	17.4458	20.1582	18.6856	20.2273	19.4322	20.4521	17.4675	20.3707	21.222	20.6152	20.1186	20.5802	20.3936	21.0405
X435	SVEINEGGLLLPHY	12.5182	12.4579	12.6292	12.6515	13.2164	12.3647	12.6453	12.8333	12.4375	13.214	16.7132	13.2058	12.9302	13.185	13.1961	12.9746	13.2134	13.3526
X436	SVEINEGGLLLPHYN	13.0481	12.9125	13.014	13.0075	13.5233	12.9603	13.1084	13.2653	13.1156	13.5375	15.886	14.0567	13.4355	13.5368	13.5398	13.3669	13.4905	13.33
X437	SVEINEGGLLLPHYNS	15.9626	15.7484	15.96	15.9506	15.9574	15.9573	15.8439	18.1006	16.6013	18.5048	15.9617	19.3028	19.1473	19.3405	19.5124	18.9116	19.4059	19.2478
X438	SVLEASLNTKYDTIEK	16.0803	15.9006	16.09	15.9717	18.4913	15.9992	16.093	16.0928	15.9817	17.0308	16.0972	16.345	16.0923	17.3638	17.2588	16.5194	16.4034	16.6313
X439	SVLEASLNTKYDTIEKV	15.0914	14.5644	14.441	14.5007	14.4971	14.5003	14.2518	14.5008	14.2039	14.5012	14.4814	14.5023	14.9351	14.4233	14.5054	14.4903	14.485	14.4136
X440	SVLEASLNTKYDTIEKVL	16.2731	16.0852	16.1436	16.1965	16.0758	16.2047	16.2643	16.465	16.2916	18.9258	16.4619	16.7733	17.2112	17.2282	17.9382	17.1607	17.3668	16.4653
X441	SVLEASLNTKYDTIEKVLL	16.2148	16.2682	16.3966	16.2534	16.3972	16.3053	16.3593	16.2931	16.2957	16.5422	16.3975	17.0762	16.4235	17.0152	16.8361	16.9077	16.3985	16.9447
X442	SVSSESEPF	20.8155	20.1583	15.156	20.5677	15.2481	15.2596	20.9439	15.2261	15.0303	18.9942	19.843	19.2673	15.152	19.8272	19.5438	14.8809	15.2417	15.2398
X443	SVSSESEPFNL	17.3269	17.7219	17.7644	18.2387	16.1904	20.1581	17.9194	17.5251	18.471	13.266	13.4136	13.3978	13.3854	16.4722	17.3295	13.313	13.304	12.6952
X444	SVSSESEPFNLR	18.0677	18.2204	18.8508	19.8587	20.1921	20.0463	18.3346	17.7331	17.753	17.7605	17.7634	20.0922	19.058	19.6613	17.757	18.6185	17.7573	17.7617
X445	SVSSESEPFNLRS	18.6241	18.1145	19.095	15.5015	14.9663	14.9988	19.8854	14.9929	17.1166	14.9363	14.4996	14.3065	13.1674	14.9958	14.9624	14.9951	14.9421	14.9887
X446	TDTGSSNNQLDQM	19.611	19.1133	18.138	17.5045	21.1746	18.8188	18.6664	17.4947	18.7623	17.4888	20.5795	17.5029	17.4713	17.4627	17.4863	17.4973	17.4004	17.2219
X447	TETTSFSITKFSPDQKNLIFQGDGY	18.7852	18.8449	18.8882	18.7456	18.9231	18.4919	18.6121	18.9195	18.843	20.9161	20.1338	19.1127	20.0506	18.9289	19.0913	22.3814	22.0409	22.0122
X448	TETWNPNHPE	16.9828	25.2566	25.0906	25.2625	16.9717	25.3448	24.8694	19.9485	25.354	23.9068	23.0451	25.1774	23.9298	25.1748	24.9812	25.4543	25.6303	25.7969
X449	TEYEEIEKV	15.9065	15.9547	15.9797	15.9627	16.3099	15.9862	15.9913	19.9329	19.3516	20.0109	16.7956	19.0246	19.1406	18.8886	18.9498	17.6203	17.0712	18.1269
X450	TEYEEIEKVLLEEQEQK	15.9516	15.622	15.6188	15.8704	15.944	15.8028	15.6259	15.6948	15.9406	18.1668	16.4553	18.4731	16.811	18.4793	17.6637	15.9526	17.9742	18.3466
X451	TFFIAPVDTKPQTGGGY	16.8298	15.8364	14.088	14.0355	16.7931	14.0882	13.8711	14.0411	13.6707	18.9239	19.3056	19.5544	20.4632	19.3871	20.3119	21.4865	21.1589	20.83
X452	TGGTVITDDLGLELK	14.8995	14.6791	14.7683	14.7349	14.7692	14.711	14.7793	14.7813	14.562	14.9072	14.9073	14.8992	16.4039	14.8333	15.7235	16.4164	16.6925	14.9065
X453	TGSDDNVISQIENPV	14.013	14.4678	13.9783	13.9806	14.6927	14.7812	16.628	13.0508	13.9502	17.248	13.9958	16.5758	17.2059	17.1338	17.999	15.9169	16.3767	16.9009
X454	TGSDDNVISQIENPVK	13.9465	13.8632	13.8549	13.8646	19.6418	14.0581	14.0194	13.9837	13.8394	16.1447	22.599	15.8799	16.5098	16.1253	15.5679	16.5464	16.6184	14.0563
X455	TGSDDNVISQIENPVKE	13.4403	13.3156	13.3335	13.4139	16.7013	13.4024	13.4356	13.4262	13.1969	14.3924	18.1978	13.4587	13.4073	13.4584	13.626	13.4543	13.4447	13.4274
X456	TGSDDNVISQIENPVKEL	18.1149	18.0014	18.0805	18.1141	19.4776	18.1043	18.0007	19.6451	18.1156	19.2156	20.5675	19.2009	19.2886	19.4464	19.4204	18.5919	18.482	18.8293
X457	TIFLPQFTDADF	13.2236	13.2205	13.2185	13.1644	13.2221	13.2226	13.0856	13.2172	12.8879	15.8837	15.129	14.9601	16.7785	15.1613	14.8433	16.6458	15.8929	16.0358
X458	TIFLPQQTDADFI	13.4997	13.604	13.6487	13.5913	13.8636	13.6041	13.4876	13.8721	13.5455	14.2685	14.5986	13.8738	15.3377	13.8609	13.8734	15.7848	14.8125	14.3313
X459	TIFLPQQTDADFILV	13.8064	13.9574	14.2273	13.9073	14.3131	13.8379	13.7812	14.4104	13.8612	14.6406	14.498	14.4977	16.4465	14.4895	14.4946	17.4911	16.2173	16.6815
X460	TLFENENGHIR	16.041	16.0953	16.1166	16.1936	16.6357	16.0178	16.0809	16.3505	16.1161	17.4241	19.6814	16.629	16.6358	16.5495	16.633	16.5072	16.6344	16.5565
X461	TLFLPQYTDADFI	10.7798	11.1015	11.6785	10.8857	11.7238	11.1971	11.0905	12.1959	11.2175	13.1617	12.2189	12.2242	14.4276	12.204	12.2306	15.3022	12.2192	12.1943
X462	TLFLPQYTDADFILV	10.3229	10.2731	10.0951	10.726	10.4588	10.646	9.87115	11.0457	10.2502	13.2801	11.1479	11.809	14.2652	11.1522	11.4038	11.1435	11.1481	11.129
X463	TLNEVVPLKDVVPEWVRIGF	11.315	11.8997	12.3353	11.526	12.5149	11.7705	12.1578	12.7219	11.9889	14.9563	12.7339	14.8079	12.6981	14.4863	13.8175	16.6633	12.7339	16.4937
X464	TVLSPNDRNSYN	16.0294	19.0457	17.4572	16.0096	15.6062	15.8486	16.0301	15.1636	15.3671	15.261	15.3794	15.0443	15.1943	15.0701	14.9156	15.3357	14.8747	15.2206
X465	TVNEGKGDFELVGQ	20.1366	19.9963	20.1594	19.4531	19.4424	20.1513	19.4568	20.3694	19.4581	19.4477	19.4518	20.1795	19.7695	19.7966	19.9032	19.4573	19.2961	19.4574
X466	TVNEGKGDFELVGQRNENQQEQ	16.6042	16.4583	16.5099	16.4886	16.754	16.4942	16.5527	16.6859	16.5904	17.4521	16.7351	16.9498	16.9471	17.3626	18.0618	16.8109	16.8835	17.007
X467	VESEAGLTETWNPNHPEL	13.8782	13.8662	13.8904	13.9039	14.1921	14.5729	15.5058	13.4464	13.886	13.8999	17.0374	13.9032	13.3697	13.9015	13.8963	13.6767	13.6126	13.7457
X468	VFEDNDFET	20.2649	20.295	20.5444	20.0333	20.5594	20.5125	20.5146	20.562	20.5316	21.3281	20.5197	21.5094	20.566	21.1906	21.0164	21.7806	20.5635	20.5646
X469	VFEDNDFETK	18.2618	17.7969	18.1536	18.4524	19.2216	17.5513	18.9794	17.252	17.3894	17.5464	22.8093	17.5501	17.1535	17.4613	17.55	17.1228	17.5231	17.5352
X470	VFEDNDFETKIDT	21.6309	20.284	19.5743	20.2202	15.7883	17.6727	20.0771	20.6035	18.4386	15.4875	15.7743	15.7484	15.2592	15.7476	15.7841	15.7329	15.7722	15.7479
X471	VLDLAIPVNRPGQL	14.2678	14.3202	14.4648	14.5125	15.4987	14.2178	14.1971	15.4806	14.7652	18.1543	23.2991	16.3094	17.0592	15.7993	16.0775	16.3289	15.9508	15.4958
X472	VLDLAIPVNRPGQLQSF	13.903	13.8153	13.8078	13.9473	14.1832	13.9162	13.7949	14.184	13.9266	15.2467	16.5145	14.7675	15.1859	14.9633	14.6849	14.1854	14.445	14.1753
X473	VLDLAIPVNRPGQLQSFL	13.8683	13.7101	13.7566	13.8565	13.977	13.9683	13.6859	13.9413	13.8121	15.2153	14.6704	14.9185	15.3728	14.131	15.2009	13.9848	13.987	13.9877
X474	VLLEEQENEPH	14.2661	13.7844	14.4374	13.8921	14.6483	14.5093	14.4485	13.8182	13.9693	14.6568	14.5806	18.4202	14.6471	18.1096	18.6479	14.6694	14.6452	14.6665
X475	VLLEEQENEPHQ	18.4766	18.3764	18.7767	19.3748	17.6015	19.1519	18.8832	19.0152	19.4403	15.0461	15.0524	15.0422	14.8763	15.0456	15.0472	15.0413	15.0522	14.97
X476	VNEGKGDFE	18.0826	19.3141	18.8464	21.2855	18.8429	18.8489	20.9423	18.425	18.3514	18.5205	18.8409	18.5622	18.4382	18.5231	18.4383	17.9419	18.0588	18.2873
X477	VNGVAPGPI	15.1703	15.1609	15.4217	15.0781	15.3456	15.1168	15.2906	15.4301	15.4087	16.1283	15.4273	16.5944	15.4229	16.0434	15.8475	18.0094	17.7744	17.7294
X478	VNGVAPGPIWTPL	18.7157	18.6628	18.5789	18.4365	12.9289	18.0269	18.0705	17.7624	12.9827	14.2713	15.0417	14.5243	14.6374	13.7415	12.9988	14.3748	15.3312	14.6705
X479	VNPDDEEDL	16.6567	16.6478	17.0076	16.596	17.7891	17.0042	16.8847	17.0125	16.8533	18.0787	17.0137	18.7335	18.2471	18.4042	18.1818	18.1818	17.0101	17.0116
X480	VNSVEIKEGSLLLPHYNS	15.0538	14.9964	15.025	15.0219	15.1938	15.0181	15.0413	15.0574	14.9892	15.2087	15.0706	15.1893	15.209	15.2089	15.6205	15.0807	15.0988	15.1554
X481	VNSVEIKEGSLLLPN	15.9121	15.9904	16.3865	16.0477	16.3867	16.0394	16.2008	16.388	16.1483	16.3889	16.3716	16.5505	17.136	17.0661	16.3891	17.2265	16.4694	16.7856
X482	VNSVEIKEGSLLLPNYN	14.3663	14.2158	14.2817	14.4081	14.6653	14.5296	14.4094	14.6413	14.3869	15.7179	17.7853	15.6387	15.6956	15.4891	16.2612	14.6671	14.6897	15.1965
X483	VNSVEIKEGSLLLPNYNS	16.967	15.5011	15.4954	15.477	18.3262	16.7305	15.4491	18.8205	17.7713	19.5607	17.3121	15.1506	19.4205	15.356	15.4924	18.4675	19.0722	15.4753
X484	VNSVEIKEGSLLLPNYNSR	16.8768	16.7679	16.8018	16.8627	17.9413	16.8655	16.9174	16.8646	16.6824	16.9154	16.9207	16.9183	16.922	16.9554	17.8787	16.844	16.7984	16.9194
X485	VSREQIEELSKNA	16.2234	16.4047	16.4121	16.3009	16.4369	16.3167	16.4375	17.471	17.9398	16.6114	16.4337	16.4376	16.4364	16.3769	16.4279	17.0047	16.4389	16.7406
X486	VSSVEINEGGLLLPH	14.5233	14.374	14.5399	14.5246	14.5548	14.5531	14.4044	14.5544	14.0257	18.3866	18.9287	18.9935	19.6367	19.1043	19.0227	18.816	18.1006	18.7717
X487	VSSVEINEGGLLLPHYNS	15.912	15.7697	15.8921	15.9146	15.9283	15.9222	15.9172	15.9411	15.9308	16.6398	17.4527	17.3575	16.9014	17.3064	17.6602	16.5265	16.6998	17.0926
X488	VSSVEINEGGLLLPHYNSR	16.0499	15.8743	15.765	16.0878	16.2222	15.8669	15.752	16.217	16.0044	16.2175	16.6505	16.2533	16.8462	17.2599	16.3347	16.2226	17.0832	17.1081
X489	VTSYTLNEVVPLKDVVPEWVR	12.5453	12.5175	12.1644	13.0694	12.8394	12.3231	12.0809	12.4214	12.2854	12.9166	12.9872	13.0803	14.0567	13.095	12.9211	13.1301	14.9866	15.8288
X490	VTSYTLNEVVPLKDVVPEWVRIGF	18.9564	17.9163	18.7227	17.2853	15.9184	16.0181	16.1034	12.4961	14.356	20.8276	19.9638	20.2632	20.5998	19.7514	19.7604	23.5733	23.4858	23.5397
X491	VVEEEEGEWRGSQ	18.8778	18.7982	18.5226	18.6964	16.4004	16.3999	18.3969	18.0891	16.3909	16.2457	16.3961	16.1765	16.0753	16.2397	16.1942	16.2364	16.2829	16.3751
X492	WMYNDQDTPVIA	19.3145	18.0579	13.4446	13.4268	19.4749	13.3479	13.2469	18.6153	17.9186	12.6079	13.4222	13.4569	13.3142	12.6624	13.3732	13.4233	15.1	13.4549
X493	YLGGNPETEFPET	17.7963	17.7824	17.8582	17.7665	17.6884	17.6954	17.6234	17.8106	17.7483	18.402	17.8606	18.3843	18.5517	18.2009	17.8611	19.489	19.6594	19.659
X494	YLVNPDDEED	19.5528	19.1855	17.932	18.7412	17.9356	19.0004	18.8979	17.8313	18.887	18.3214	17.9143	18.6676	17.9042	17.9023	18.5372	17.919	19.8659	19.4971
X495	YLVNPDDEEDL	18.6346	18.6617	18.7206	18.7266	18.6359	18.7279	18.6221	18.7284	18.6585	19.9973	18.7289	20.0095	19.8985	19.3452	19.4493	19.5978	19.6744	19.8997
X496	YLVNPDDEEDLRV	15.6701	15.9562	16.155	17.0102	15.9552	16.1825	17.0556	15.8673	15.8383	15.9161	15.9547	15.9558	15.8785	15.9484	15.8902	15.6875	15.715	15.8248
X497	YLVNPDDEEDLRVV	19.1713	18.6891	17.8091	19.4589	18.4744	19.5004	17.8284	18.5179	17.7406	19.2858	19.3176	18.9872	20.7131	18.6691	18.1922	18.9342	19.0918	19.239
X498	YNAAWDPSNKER	16.9926	16.7444	16.7638	17.8193	20.7908	16.7678	17.3674	16.7603	16.3349	16.5039	16.767	16.7434	16.7263	16.5624	16.7568	16.1626	16.1293	16.3638
X499	YQHEGKEEET	18.2527	20.4382	18.2502	20.9294	18.2554	21.0188	18.2527	18.2102	18.243	18.3456	18.0812	18.2609	19.6306	18.2562	18.4184	19.5679	19.375	19.0336
X500	YQHEGKEEETSSE	18.2446	18.3553	17.3261	18.4949	17.3213	17.3257	18.0646	17.3205	17.0607	17.2364	17.3255	17.2715	16.9827	17.3155	17.3257	16.944	17.0512	17.1217
X501	YQHEGKEEETSSESQER	20.3413	19.4102	19.2276	19.5535	18.3718	19.0379	19.3599	13.7358	16.992	13.7019	13.7423	13.7403	13.7375	13.5656	13.5759	13.6589	13.7374	13.7409

## Sheet: scaled
	sequence	A4	A5	A6	B1	B2	B3	B4	B5	B6	G1	G2	G3	K1	K2	K3	P1	P2	P3
X1	ALGDTTNGCISTGPH	-0.590603	-0.849284	-0.72791	-0.812696	-0.55078	-0.748306	-0.511689	-0.517526	-0.667974	0.179069	0.164215	-0.04545	0.179075	0.0955619	0.176894	2.49036	2.55579	0.181252
X2	DDVKSACCDTCLCTR	-0.685174	-0.723406	-0.688608	-0.665748	-0.22878	-0.625731	-0.842056	-0.314237	-0.573867	1.35278	2.98433	1.32637	0.85836	-0.22781	-0.225062	-0.225464	-0.237696	-0.258193
X3	DTHKFCYKACHNSE	-0.432111	-0.55321	-0.549257	-0.534615	-0.994655	-0.772962	-0.360799	-0.368122	-0.406918	1.85672	-0.357755	-0.365055	-0.356172	-0.362917	-0.360671	2.00714	2.33253	0.578833
X4	ESCHSACDKCVCAY	-0.601043	-0.771168	-0.671938	-0.582646	0.1113	-0.824464	-0.681494	-0.273043	-0.626174	0.377251	3.63921	0.265432	0.0491545	0.103251	0.14711	-0.0564025	0.366694	0.0289647
X5	GDDVKSACCDTCLCT	-0.663935	-0.903399	-0.657567	-0.90424	-0.660353	-0.654101	-0.790539	-0.713972	-0.759257	-0.650351	-0.651334	0.927986	0.667379	0.693309	0.553885	1.91752	1.72919	1.51978
X6	GDDVKSACCDTCLCTR	-0.64829	-0.652462	-0.691129	-0.566409	-0.558075	-0.998249	-0.788162	-0.563591	-0.648968	0.106451	1.28425	-0.501143	0.0981176	0.16241	-0.556179	1.56827	2.25701	1.69615
X7	AAVDTLPPVVNESEEPT	-0.890623	-0.718714	-0.818939	-0.487068	-0.82588	-0.714705	-1.02563	-0.314412	-0.620967	2.22311	-0.314151	0.637751	1.50577	-0.311978	-0.321575	0.407835	0.739873	1.8503
X8	AAVDTLPPVVNESEEPTAKP	-0.838323	-0.933864	-0.701053	-0.712892	-0.697103	-0.704152	-0.142107	-0.811293	-0.860364	-0.692112	0.891088	0.876912	1.2834	0.729365	0.188992	1.91759	1.89986	-0.693945
X9	AFNTDYEEIE	0.0505843	-0.229906	-1.131	-1.37294	-1.12622	0.849795	-1.12677	-1.12489	0.998957	-0.18906	-1.13166	0.827801	0.149083	0.375306	-0.00443704	1.72287	1.44578	1.01671
X10	AFNTDYEEIEK	0.61431	0.584942	0.726531	0.76065	-0.378976	0.78774	0.732429	0.762787	0.74415	-1.50286	-1.53176	0.656049	0.568828	0.587218	0.422835	-1.50106	-1.508	-1.52581
X11	AFNTDYEEIEKV	0.405406	0.391289	0.493174	0.910509	-0.368323	0.802948	0.989005	-2.16327	-1.59673	0.793194	-1.53264	-1.53268	0.707403	0.322705	0.739441	0.142681	0.265152	0.230739
X12	AFNTDYEEIEKVL	-0.918085	-1.02986	-0.880338	-0.893383	-0.879824	-0.928769	-1.07675	0.686192	-0.868827	1.4253	-0.877839	0.933955	0.881556	0.893522	1.27919	0.796665	0.0508573	1.40644
X13	AFNTDYEEIEKVLL	-0.86441	-0.963198	-0.857484	-0.889938	-0.852414	-0.852667	-0.849846	-0.84783	-0.76697	0.970207	-0.855174	1.10973	1.20626	1.33224	1.3881	0.938392	0.783528	0.871487
X14	AFNTDYEEIEKVLLEDQEQEPQ	-0.637181	-0.83007	-0.840479	-0.421165	-0.321636	-0.685145	-0.673963	-0.574729	-0.699246	1.9091	-0.277848	-0.0920337	1.35235	-0.0578872	2.72379	-0.277556	0.333623	0.0700676
X15	AFNTEYEEIE	-0.564624	-0.609159	-0.489609	-0.778007	-0.60236	-0.633637	-0.478517	-0.863254	-0.552307	0.749145	-0.484818	1.201	-0.480717	-0.489661	-0.490241	2.02194	1.99664	1.5482
X16	AFNTEYEEIEK	0.577376	0.604444	0.744879	-1.39106	-0.429681	0.798674	0.753205	0.756538	0.645885	0.57696	-0.328229	0.358899	0.18299	0.185331	0.123375	0.4414	-2.31071	-2.29027
X17	AFNTEYEEIEKV	0.513976	0.288757	0.392819	1.2193	-1.64049	1.02317	1.27074	0.248656	0.106521	0.64276	-2.7183	0.152806	0.158082	-0.0796402	0.489489	-0.743422	-0.833004	-0.492227
X18	AFNTEYEEIEKVL	-0.675822	-0.963278	-0.937027	-0.684464	-0.651906	-0.707481	-0.805897	1.25478	-0.291884	1.7063	-0.679399	0.320644	1.0369	1.08231	2.13568	-0.577162	-0.64135	0.0790672
X19	AFNTEYEEIEKVLL	-0.766403	-0.934486	-0.835606	-0.83778	-0.833532	-0.839248	-0.848869	-0.834076	-0.949361	1.20234	-0.834689	1.37657	1.12493	0.947991	1.56988	0.716044	0.816148	0.760144
X20	AFNTEYEEIEKVLLEEQEQ	-0.590968	-0.829698	-0.442563	-0.716559	-0.372655	-0.366138	-0.462014	-0.842604	-0.710454	-0.138913	-0.193318	2.46797	-0.138666	1.97176	1.84841	-0.203671	-0.142356	-0.137569
X21	AFNTEYEEIEKVLLEEQEQK	-0.546167	-0.951671	-1.04389	-0.664561	-0.845878	-0.724536	-0.983595	-0.832789	-0.551191	1.31506	-0.545327	1.46636	1.11975	0.762223	1.45825	-0.5438	1.50064	0.611126
X22	AFNTEYEEIEKVLLEEQEQKS	-0.326916	-0.761871	-1.16197	-0.346998	-0.677327	-0.596762	-1.29768	0.857926	-0.340806	0.366582	-0.329628	-0.325986	2.51149	1.29581	-0.330469	-0.326372	1.71265	0.0783307
X23	AFPGSAQEVDRLLENQ	-0.844748	-0.957281	-0.639547	-0.918586	-0.395947	-0.813243	-0.463008	-0.398156	-0.522898	0.40307	-0.393122	-0.390832	0.0051799	0.46123	0.742339	2.89103	1.64856	0.585963
X24	AFPGSAQEVDRLLENQK	-0.718872	-0.706466	-0.363783	-0.666084	-0.529336	-0.849069	-0.519135	-0.337495	-0.50909	-0.185206	-0.177328	-0.179829	-0.184193	-0.180435	-0.187575	2.41897	2.25819	1.61673
X25	AFPGSAQEVDRLLENQKQS	-0.965876	-0.865798	-0.4538	-0.95907	-0.207025	-0.922518	-0.575631	-0.179967	-0.492111	-0.200608	-0.186317	-0.163031	-0.168607	0.851467	-0.117935	2.80976	1.30768	1.4894
X26	AGEEDNVISQIQRP	-0.88529	-0.939141	-0.853701	-0.846448	-0.85352	1.69473	0.557832	-0.843242	-0.000329222	-0.292626	1.2972	1.81299	0.624701	0.900288	1.03173	-0.857664	-0.85325	-0.694262
X27	AGEEDNVISQIQRPV	-1.10232	-1.04676	-0.844	-0.0388872	-1.5438	0.720416	0.774445	-0.418979	-0.471275	1.18702	-1.84003	0.94188	1.26127	0.682582	1.50477	0.257383	-0.0673395	0.0436213
X28	AGEEDNVISQIQRPVK	-0.747642	-0.73588	-0.757374	-0.739089	1.48252	-0.274436	-0.77087	-0.735973	-0.797919	0.758	2.45833	0.579334	0.958954	0.767897	0.783644	-0.744024	-0.749377	-0.736093
X29	AGEEDNVISQIQRPVKEL	-1.27629	-1.28585	-1.29677	-1.28866	-0.477899	-1.0599	-1.27809	0.923683	0.260303	0.882396	-0.20787	0.685289	1.16269	1.0202	1.13484	0.753514	0.573455	0.774971
X30	AGLTETWNPNHPE	1.43437	1.3583	1.38062	1.21026	-0.915866	-0.914223	0.856039	-0.916697	-0.920101	0.0404535	-0.957316	-0.906883	-0.906373	-0.909009	-0.910402	0.783569	0.807955	0.385288
X31	AGLTETWNPNHPEL	-0.610184	1.43747	-0.605589	1.74954	1.56085	-0.610628	1.45989	0.988963	0.856757	-1.06241	-0.616364	-0.755699	-0.603786	-0.684134	-0.627057	-0.638659	-0.632778	-0.606183
X32	AILTVLKPDDRNSF	-0.823205	-0.700013	-0.756512	-0.164741	-0.362536	-0.497559	-0.857354	-0.304992	-0.653259	2.09994	-0.155782	-0.145245	2.52791	-0.158345	1.60709	-0.209451	-0.187468	-0.258471
X33	AILTVLNSNDRNS	-0.519209	-0.611325	-0.957128	0.049406	-0.256029	-0.802116	-0.952688	-0.743445	-0.806319	-0.236193	0.0335465	0.0497835	0.565133	0.286961	-0.0454072	0.0583906	2.11732	2.76932
X34	AILTVLNSNDRNSF	-0.63692	-0.987689	-0.981467	-0.554317	-0.545736	-0.768459	-1.0126	-0.545604	-1.11383	-0.545432	0.775398	1.03279	1.93285	0.609064	1.56772	-0.345593	1.05907	1.06075
X35	AILTVLSPNDRNSY	-0.698813	-1.04026	-0.942938	-0.689584	-0.687661	-0.687782	-0.992689	-0.688461	-1.0185	0.678307	0.857992	1.29996	1.68698	0.815416	1.77169	-0.685514	0.293732	0.728136
X36	AIVIVTVNEGKGDFELVGQR	-0.744539	-1.00002	-0.60955	-0.720675	-0.113069	-0.423138	-0.822453	-0.425094	-0.341251	-0.0765367	0.260735	2.20157	-0.114146	2.90343	-0.0665738	0.101594	-0.0785709	0.0682854
X37	AIVIVTVNEGKGY	-0.678647	-0.816549	-0.682655	-0.748678	-0.81135	-0.776795	-0.680065	-0.743994	-1.04436	1.315	-0.678227	0.950013	0.704026	-0.677538	1.62565	1.44837	1.31438	0.981413
X38	AIVVLLVNEGKGNLELVGFKNEQQE	-0.960428	-0.910317	-0.88436	-0.705951	-0.518458	-0.859712	-0.969024	-0.50138	-0.219249	0.664224	-0.116139	1.24926	0.159815	2.36736	-0.10732	-0.125417	0.483755	1.95335
X39	AKLSPGDVFVIPA	-0.786477	-0.870664	-0.642272	-0.821933	-0.571648	-0.576721	-0.906244	-0.520758	-0.485716	2.22013	-0.484947	1.94271	0.549857	1.48425	0.484807	-0.280071	-0.481625	0.747327
X40	AKLSPGDVFVIPAGHPV	-0.685912	-0.977157	-0.860635	-0.946911	-0.216879	-0.878771	-0.855202	-0.223284	-0.481267	1.83254	-0.167198	0.462218	-0.127197	2.11732	1.85184	-0.337769	-0.165576	0.659838
X41	AKLSPGDVFVVPAGHPVAI	-0.850724	-1.02095	-0.96387	-0.852315	-0.927569	-0.903227	-0.987623	0.09626	-0.850888	1.31221	-0.850435	0.922625	1.42097	0.954606	1.65293	0.460483	0.866845	0.52067
X42	ALEPDHRVESEA	-0.306775	2.01721	1.05695	2.3845	-0.313728	-0.302489	1.51024	-0.401708	-0.306247	-0.644042	-0.302931	-0.574089	-0.709739	-0.487012	-0.670253	-0.692275	-0.704726	-0.55289
X43	ALEPDHRVESEAG	1.54252	-0.580333	-0.588688	1.31973	1.58117	0.377456	1.0652	-0.666704	-0.582538	-0.581168	1.91906	-0.584379	-0.590351	-0.597779	-0.624221	-1.20511	-0.600686	-0.603184
X44	ALEPDHRVESEAGL	-0.0881593	-0.0435386	-0.117895	-0.131836	2.6259	-0.415818	0.0539218	-0.450811	-0.420791	-0.42734	2.77395	-0.416063	-0.538502	-0.520695	-0.417544	-0.430362	-0.490592	-0.543821
X45	ALEPDNRIESEGGL	-0.185359	-0.121579	-0.257108	2.28783	3.00631	-0.16824	-0.167747	-0.459983	-0.729626	-0.570355	-0.185211	-0.167975	-0.173116	-0.423679	-0.171125	-1.03054	-0.301863	-0.180632
X46	ARLSPGDVLVIPAGHPVAI	-0.733215	-0.996396	-0.781997	-0.829286	-0.80924	-0.80497	-0.743274	-0.748886	-0.898549	0.997205	-0.736305	0.509208	1.2731	0.754377	1.87308	0.958094	1.58674	0.130308
X47	ASSNLDLLGF	-0.709128	-0.928634	-0.754882	-0.888698	-0.650658	-0.653451	-0.947711	-0.64976	-0.907126	1.96944	1.41592	0.96093	0.763106	1.47111	1.11671	0.197095	-0.158363	-0.645906
X48	ASSNLNLLGFGINAENNERNFL	-0.850525	-0.919692	-0.67296	-0.94446	0.0818117	-0.807627	-0.858532	0.0893315	-0.181533	0.0985891	2.97423	1.93491	0.0655227	0.0967704	0.0813667	0.0267126	-0.0547681	-0.159142
X49	ASSNLNLLGFGINAK	-0.482633	-0.777044	-0.928889	-0.701767	-0.483023	-0.941009	-0.876581	-0.486615	-0.597168	1.64611	2.67543	0.433874	-0.22076	-0.139105	0.946826	-0.481895	0.900304	0.513937
X50	AVLTVLNSNDRNS	-0.619033	-0.849208	-0.656081	-0.865662	-0.561996	-0.756488	-0.516042	-0.562041	-0.686496	0.171467	0.133451	0.175218	0.173653	0.0805126	0.148342	2.63017	2.38522	0.175012
X51	AVLTVLNSNDRNSF	-0.297149	-0.742073	-0.955722	-0.650406	-0.295211	-0.445259	-0.766511	-0.328169	-0.754753	1.13984	2.27324	-0.300326	1.80855	-0.296901	1.76185	-0.386755	-0.302998	-0.461248
X52	DALEPDNRIESE	-0.502964	1.99757	1.84046	1.7888	-0.510531	0.459373	1.35844	-0.530237	-0.50352	-0.531433	-0.564637	-0.504645	-0.601833	-0.504611	-0.736938	-0.608478	-0.789863	-0.554957
X53	DALEPDNRIESEGG	1.92956	1.8136	1.55612	0.00681744	-0.582342	-0.558014	0.769808	1.31702	0.0776299	-0.739385	-0.560913	-0.590181	-0.958067	-0.691052	-0.659376	-0.615089	-0.844401	-0.671736
X54	DALEPDNRIESEGGL	1.20171	1.18451	0.659981	1.17286	1.29133	0.398438	-1.55108	1.07728	0.599838	-0.775561	0.604966	-0.429413	-1.51655	-0.958718	-0.682662	-0.79359	-0.636149	-0.847197
X55	DALEPDNRIESEGGLI	0.657641	0.187626	0.133145	0.579949	3.17155	-0.464054	0.125422	1.48499	-0.484807	-0.790718	-0.470041	-0.531607	-0.474308	-0.623787	-0.499784	-0.553052	-0.948902	-0.499263
X56	DALEPDNRIESEGGLIET	1.47696	1.24789	1.39841	1.28212	-0.32317	0.683463	1.15943	0.514774	0.15312	-0.779561	-0.655085	-0.889647	-1.17994	-1.17521	-1.44762	-0.508824	-0.331132	-0.625975
X57	DDEEEQEEET	-0.773849	-0.773478	0.352329	-0.786062	-0.807518	-0.896919	-0.778373	-0.781885	-0.775286	0.0745806	-0.803715	1.5506	1.2431	0.318565	1.4994	1.4994	1.41105	-0.771945
X58	DDEEEQEEETST	1.72611	1.86234	-0.698189	1.68946	-0.0276674	1.73572	-0.69765	-0.713394	-0.855788	-0.540275	-0.686833	-0.701914	-0.695597	-0.213988	-0.111428	-0.739726	-0.350764	0.0195874
X59	DDEEEQEEETSTQ	-0.770774	-0.772064	0.780846	1.23751	1.64666	1.61303	1.56319	-1.11822	-0.752302	-0.746334	0.820696	-0.753069	-0.804214	-0.159595	0.335463	-0.746727	-0.762209	-0.611878
X60	DDEEEQEEETSTQV	1.19339	-1.49711	0.158301	0.373215	-1.48324	1.51833	0.468954	1.85112	-0.436547	-0.827878	-1.47154	0.865706	-0.994746	-0.112552	0.410799	-0.0989533	-0.105688	0.188449
X61	DDEEEQEEETSTQVQRY	-0.853322	-0.834585	0.090446	0.735268	1.6645	0.890654	0.258054	-1.99243	-2.00425	-0.799498	-0.13221	0.276989	-0.465331	0.381995	0.168817	0.932828	0.833537	0.848534
X62	DEEEGQEEET	-0.427615	1.59521	1.92599	1.38189	-0.992806	-0.990705	-0.99375	-0.991904	-1.49942	-0.227859	-1.01204	0.196313	0.453355	0.325857	-0.320609	0.266161	0.601333	0.710586
X63	DEEEGQEEETTKQV	-1.46851	1.16579	-0.353501	0.241502	-1.47077	-0.963967	-0.907997	2.33205	0.610732	-0.331008	-1.4688	0.377837	-0.0684093	0.450744	0.612257	0.411939	0.233157	0.596952
X64	DEEEGQEEETTKQVQ	0.603972	-0.895812	-0.907935	-0.62568	-0.717672	0.136505	0.120892	1.13235	0.178264	0.296299	-3.15148	0.85089	0.374015	0.984516	0.803901	0.158275	0.246922	0.411775
X65	DEEEGQEEETTKQVQR	-0.387904	-1.37865	-0.897974	-0.422422	0.758652	-0.135924	-0.595573	-1.2685	-1.41048	0.566751	1.78541	0.875804	0.830766	1.0151	0.789883	-1.40534	0.668514	0.611892
X66	DEEEGQEEETTKQVQRY	0.549916	0.797565	1.07357	-0.319779	1.51867	1.20918	1.25433	-1.39185	-1.36261	-1.35794	-0.0224753	0.6561	-0.736531	0.364782	0.272669	-0.858857	-1.34899	-0.297743
X67	DEEEQEEETSTQVQR	-0.337543	-0.470725	-0.405542	-0.335002	1.97346	-0.672605	-0.423344	-0.349086	-0.547444	-0.334619	3.29435	0.0533759	-0.364242	-0.290119	-0.330432	-0.330123	-0.185581	0.0552171
X68	DIFVNSVEIKEGSLLLPNYNS	-0.657227	-0.904109	-0.572574	-0.859777	-0.456408	-0.509054	-0.547032	-0.356448	-0.410485	1.62403	-0.362957	1.82725	-0.360207	1.87909	1.84139	-0.415086	-0.394821	-0.36558
X69	DIFVNSVEIKEGSLLLPNYNSR	-0.954661	-0.97981	-0.587216	-0.924904	-0.50407	-0.570942	-0.904292	-0.677003	-0.523342	1.55909	0.207047	2.92769	0.256061	0.652297	0.24913	0.253903	0.260578	0.260447
X70	DLAIPVNNPGQLES	-0.368197	-0.535409	-0.611133	-0.337426	1.96438	0.31604	0.0302014	-0.614392	-0.613486	1.17748	2.60998	-0.659157	-0.612631	-0.620365	0.83656	-0.653318	-0.667363	-0.641765
X71	DLAIPVNNPGQLESF	-0.701515	-0.767744	-0.730281	-0.801494	2.87979	-0.720015	-0.714149	-0.700303	-0.879874	0.304118	1.82396	-0.0152974	0.203402	-0.457197	0.202212	0.529377	0.18058	0.364425
X72	DLAIPVNNPGQLESFL	-0.801568	-1.06712	-0.941848	-0.978419	-0.593861	-0.777976	-0.848858	-0.716308	-0.981053	1.27888	1.55878	0.536425	1.36155	0.753888	0.804656	1.15026	0.979821	-0.717255
X73	DLAIPVNNPGQLESFLLSGT	-0.910235	-0.549862	-0.587292	-0.307823	-0.390021	-0.494138	-0.923021	-0.527274	-0.753722	1.32365	-0.326286	2.16214	1.45675	-0.319356	-0.300747	-0.315061	-0.309451	2.07175
X74	DLAIPVNNPGQLESFLLSGTQNQPS	-0.838991	-0.868932	-0.794833	-0.836913	-0.846621	-0.798343	-0.807908	-0.79367	-0.937021	0.880251	-0.793702	0.371772	1.47493	0.740805	0.592722	1.56756	1.38471	1.30418
X75	DLAIPVNRPGQLQ	-0.357354	-0.358071	-0.574514	-0.382412	-0.363269	-0.528988	-0.87144	1.98346	-0.355365	-0.361814	-0.364126	-0.369315	2.35902	-0.340341	2.10792	-0.357671	-0.363975	-0.501744
X76	DLAIPVNRPGQLQSF	-1.05506	-1.06268	-1.06031	-1.17366	0.440661	-1.05748	-1.07729	-1.05898	-1.05991	1.01623	1.07465	0.935294	0.944226	0.815267	0.661927	0.844562	0.850575	1.02199
X77	DLDIFVNSV	-0.895504	-0.998309	-0.936719	-0.789646	-0.790911	-0.795811	-0.945182	0.331247	-0.788856	1.68831	-0.792665	1.09741	1.59588	1.31693	1.27073	0.42482	-0.164383	0.172654
X78	DLDIFVNSVEI	-0.684183	-0.685321	-0.69219	0.578316	-0.71372	1.80921	-0.684476	-1.31084	-0.747908	0.956632	-0.707746	1.59604	0.985523	0.900101	1.31844	-0.684129	-0.67856	-0.555191
X79	DLDIFVNSVEIK	-1.1041	-1.10708	-1.34179	-1.11946	0.653078	1.37016	-1.10425	0.842346	0.353408	0.873227	1.71005	0.582356	0.575593	0.567242	0.613748	-1.10236	-0.826835	-0.435333
X80	DLDIFVNSVEIKEGSLLLPNYNS	-0.449336	-0.885993	-0.627121	-0.711801	-0.445812	-0.472764	-0.762382	-0.739858	-0.709376	0.815689	-0.446758	1.40233	1.52015	0.623612	2.67821	-0.39238	0.0492757	-0.445692
X81	DLNFTPNEFDS	1.9298	-0.33671	-0.844995	-1.01497	-0.42069	-0.432022	-0.421965	1.53867	1.69426	-0.416626	1.92914	-0.0458615	-0.713403	-0.42953	-0.413414	-0.618522	-0.417053	-0.566113
X82	DLSAPDLDNSGGGGSIK	-0.601532	-0.559508	1.60325	-0.594844	-0.56017	-0.587416	-0.556803	-0.597725	-0.660988	-0.370156	-0.735105	-0.539534	0.0759166	-0.287344	-0.544751	1.656	1.719	2.14172
X83	LCESNADCTNKGSGK	-0.441988	-0.681334	-0.589026	-0.555785	0.0273106	-0.91846	-0.81062	-0.378054	-0.614646	0.271593	3.42966	0.0681749	-0.11336	0.00627876	-0.188779	0.0829352	1.32656	0.0795432
X84	DTIEKVLLEEQENEPH	-0.740562	-0.661695	-0.407204	-0.680127	-0.392734	-0.80601	-0.717293	-0.300574	-0.676351	-0.289838	-0.298711	-0.29444	0.875978	-0.301857	-0.292287	2.48497	1.65016	1.84858
X85	DTSNIANQLDSTPR	-0.172092	-0.312709	-0.310763	-0.0531701	3.87821	-0.045683	-0.0499339	-0.197466	-0.589354	-0.24182	0.350669	-0.0511782	-0.069505	-0.313758	-0.0737023	-0.489853	-0.723604	-0.534285
X86	DVIVKVSREQIEELSKNA	-0.669825	-0.791956	-0.432868	-0.661476	-0.436138	-0.882778	-0.619074	-0.413315	-0.58522	-0.412023	-0.422955	-0.401435	-0.402847	0.480589	0.614569	2.04509	2.03655	1.95511
X87	EAAFNTDYEEIEK	-0.454365	-0.452934	-0.446101	-0.480406	2.04623	-0.837706	-0.499205	1.22347	0.479411	-0.43993	2.79532	-0.314194	-0.572153	-0.448445	-0.482968	-0.457117	-0.33243	-0.326484
X88	EAAFNTDYEEIEKV	-0.325614	-1.0324	-1.5123	-0.934669	-1.51361	-0.370021	-0.780991	1.06517	0.746728	0.521109	-1.52679	0.494488	1.32802	0.844704	1.27366	0.588046	0.595033	0.539436
X89	EAAFNTDYEEIEKVL	-1.05684	-1.05719	-1.08781	-1.09859	-1.05513	-1.06473	-1.05074	1.28738	1.09125	0.724371	-1.05038	0.74561	0.523851	0.965025	1.0931	0.598453	0.501491	0.99088
X90	EAAFNTDYEEIEKVLL	-0.428898	-1.10005	-1.10342	-1.18065	-0.199095	-1.08291	-1.02247	-1.08923	-1.12064	0.806416	0.346459	1.14743	0.838853	1.16086	1.21443	1.00544	0.767865	1.03964
X91	EAAFNTDYEEIEKVLLEDQEQEPQ	-0.638831	-0.827923	-0.496109	-0.819477	-0.496202	-0.691236	-0.612239	-0.959663	-0.90961	-0.494861	-0.495275	2.40064	-0.170677	1.08819	1.52928	0.755429	0.724987	1.11358
X92	EAAFNTEYEEIEK	-0.414744	-0.67129	-0.577956	-0.51668	0.0634867	-0.870172	-0.703706	-0.406129	-0.633239	0.157484	3.53584	0.0694653	-0.115158	-0.0329194	-0.159507	0.05828	1.17352	0.0434243
X93	EAAFNTEYEEIEKV	-0.48595	-1.36575	-1.23377	-1.0602	-0.312323	-0.376687	-0.836685	0.933015	0.47983	0.431258	-2.13177	0.612259	1.18598	1.04712	1.1263	0.669337	0.562451	0.755584
X94	EAAFNTEYEEIEKVL	0.0620668	-1.13302	-1.13166	-1.18206	0.338764	-1.13481	-1.20653	-0.693518	-1.12761	1.03145	-0.498525	1.24297	0.979055	1.25688	1.37115	0.614554	0.46892	0.741932
X95	EAAFNTEYEEIEKVLL	-0.350283	-1.03807	-1.0311	-1.04485	-0.543552	-0.917694	-1.10224	-1.0541	-1.14048	0.944613	-0.0266047	1.20569	0.957162	1.30412	1.34931	0.763758	0.747471	0.976845
X96	EAAFNTEYEEIEKVLLEEQEQ	-0.627396	-0.736569	-0.704264	-0.559222	-0.407917	-0.568692	-0.88048	-0.409814	-0.935913	-0.402713	-0.41788	1.26421	1.29982	2.32679	1.66239	-0.402522	-0.404532	0.904711
X97	EAAFNTEYEEIEKVLLEEQEQK	-0.839656	-0.902808	-0.718538	-0.812375	-0.721072	-0.711217	-0.782615	-0.765538	-0.802947	0.46966	-0.708971	2.27837	0.55974	1.2994	1.35882	0.296005	0.27539	1.22835
X98	EAAFNTEYEEIEKVLLEEQEQKS	-0.66579	-0.99373	-0.528723	-0.486063	-0.759257	-0.549065	-0.740851	-0.812985	-1.05479	-0.518946	-0.52625	1.83879	1.61139	0.98918	-0.138692	0.541199	1.65582	1.13876
X99	EASFNTGYEEIEK	0.0963594	-0.47658	-0.554772	-0.502395	2.1033	-0.772359	-0.676574	1.08338	-0.0910759	-0.475414	2.84123	0.0949459	-0.247979	-0.471611	-0.50892	-0.485711	-0.478807	-0.477016
X100	EASFNTGYEEIEKV	-0.326762	-1.10566	-1.35634	-0.427658	-0.500291	0.519578	-0.344726	1.46479	0.0306284	1.51854	-1.87028	0.77382	0.95112	1.10742	1.15476	-0.330391	-0.846353	-0.412195
X101	EASFNTGYEEIEKVL	-0.710021	-0.976132	-0.970854	-0.588983	-0.450149	-0.791666	-0.918785	2.10702	-0.392268	1.40384	-0.396676	0.0973581	1.26774	1.15874	1.5094	-0.406263	-0.548258	-0.394044
X102	EASLNTKYDTIEKVL	-0.744827	-1.02824	-0.589134	-0.651868	-0.0319493	-0.304401	-0.818991	-0.50257	-0.461751	-0.0552367	-0.0514138	2.25962	-0.0993633	2.85151	-0.0418774	0.356596	-0.0268677	-0.0592366
X103	EASLNTKYDTIEKVLL	-0.759822	-0.698076	-0.533552	-0.850576	-0.933023	-0.782603	-0.816167	-0.607413	-0.531352	1.0934	-0.525145	1.46312	-0.526315	1.54666	-0.524933	1.10264	1.12698	1.75617
X104	EASLNTKYDTIEKVLLEEQENEPH	-0.80075	-0.634914	-0.740532	-0.401468	-0.345298	-0.863105	-0.8329	-0.738898	-0.945332	-0.344184	-0.345308	0.725548	0.559041	0.819337	0.325167	0.57522	0.966944	3.02143
X105	EASLNTKYDTIEKVLLEEQENEPHQ	-0.664515	-0.982025	-0.966224	-0.889506	-0.465569	-0.843862	-0.961163	-0.109948	-0.342702	1.87356	-0.118118	0.200198	0.189268	2.61836	1.07999	-0.228954	0.192635	0.418573
X106	EDEDEDEEE	-0.179847	-0.745976	-0.961952	-0.573479	-0.781852	-0.694403	-0.740431	-0.686201	-0.660121	0.344597	0.000305054	-0.171735	0.350412	0.327773	0.300825	1.29839	3.21306	0.360639
X107	EDNDFETKIDT	2.03067	1.45656	0.496435	1.44079	-0.567407	-0.547179	1.13407	1.27559	-0.247458	-0.717174	-0.564306	-0.615441	-0.892822	-0.553567	-0.571578	-0.923243	-0.878515	-0.755426
X108	EEDEDEDEKEE	-0.367758	-0.372713	-0.740466	-0.275281	-0.820799	-0.582194	-0.517967	-1.28949	-0.830937	-0.276	-0.499761	1.77787	-0.270426	0.788347	0.913775	-0.273875	1.20246	2.43522
X109	EEDEEEKEQ	-0.341225	-0.49945	-0.984645	0.0819636	-0.409687	-0.733741	-0.794834	-0.870028	-0.659204	-0.198238	0.0140281	0.0853511	0.0785223	0.0772333	-0.0378817	0.0811709	2.52361	2.58705
X110	EEEEGEWRGSQ	2.37787	2.60671	-0.266154	0.817078	-0.435866	-0.280163	0.616982	-0.295338	-0.678386	-0.293129	-0.262256	-0.26947	-0.708602	-0.420391	-0.384433	-0.698532	-0.882164	-0.543754
X111	EEEGQEEETTKQVQ	0.376518	-0.481916	-1.37139	-1.33686	0.205287	0.771252	0.788474	-1.37131	1.78449	0.163532	-1.37234	0.59697	0.0347816	1.19412	0.994969	0.286954	0.0998048	-1.36333
X112	EEEGQEEETTKQVQR	-0.82897	-0.834288	-0.455192	-0.693997	0.626093	-0.759051	-0.539525	-0.209788	-0.49141	-0.206895	3.47174	0.695937	-0.21223	0.705617	-0.211387	0.359168	-0.208786	-0.207038
X113	EEESEEQNEGNSV	1.43271	1.07907	-0.492017	0.466013	1.20331	-0.511322	0.408636	-0.507115	-0.568759	-0.494051	2.6991	-0.492131	-0.841936	-0.575038	-0.500924	-0.895272	-0.771617	-0.638654
X114	EEESEEQNEGNSVLSGF	-0.852394	-0.689698	-0.716635	-0.648931	1.40055	-0.994734	-0.869153	-0.647881	-0.939098	-0.646294	0.818717	-0.00596758	0.484048	0.147114	-0.0671558	0.893914	0.629748	2.70385
X115	EEETSSESQER	-0.667122	-0.845445	-0.717558	-0.624993	0.0769493	-0.798385	-0.656544	-0.235998	-0.613304	0.369106	3.59229	0.351804	0.16764	0.191747	0.42517	-0.111483	0.07286	0.0232702
X116	EEVKVEVEDD	-0.962957	-0.335394	-0.898866	0.631243	-0.629737	3.33917	0.611152	-0.958636	-0.514152	-0.316666	-0.784366	0.169139	0.149618	-0.119783	0.0629728	0.898046	-0.19259	-0.148189
X117	EGSLLLPNYNSR	-0.168291	-0.206454	-0.195617	-0.122272	3.79454	0.694358	0.205123	-0.304841	-0.450713	-0.446749	-0.134573	-0.125342	-0.134383	-0.432467	-0.131714	-0.420544	-0.799539	-0.620523
X118	EIKEGSLLLPH	-0.530704	-0.647404	-1.11418	-0.157366	-0.368706	-0.731179	-1.20462	-0.21961	-0.863388	-0.158608	-0.154699	-0.152676	1.73853	0.973155	-0.15392	-0.158077	1.49968	2.40377
X119	EIKEGSLLLPHYNS	-0.436571	-0.71173	-1.08302	-0.241572	-0.612428	-0.275993	-1.32328	0.309169	-1.013	0.514619	-0.251249	0.635892	3.2166	0.517994	0.520291	-0.138	0.329872	0.0424007
X120	EIKEGSLLLPN	0.889997	-1.75103	0.860132	-1.9896	-0.38909	0.599571	-1.76387	0.503427	0.368851	0.490053	-1.4632	0.35441	0.394945	0.388121	0.471546	0.769689	0.667322	0.59872
X121	EIKEGSLLLPNYN	-0.833398	-0.799716	-0.613936	-0.723235	-0.618868	-0.806505	-0.609794	-0.672874	-0.607698	1.24523	0.940802	1.52355	-0.604256	1.60745	1.72991	-0.60497	-0.60457	1.05288
X122	EIKEGSLLLPNYNS	0.241163	-0.280412	-0.17394	0.0559511	-1.2693	0.313567	-0.0526702	-1.733	-1.73107	0.84756	-1.71525	0.88485	0.971681	1.01606	1.51035	0.336539	0.409154	0.368764
X123	EINEGGLLLPH	0.871835	0.845773	0.841384	0.73548	-2.44608	0.509945	0.395019	-0.175093	-0.410372	0.679488	-0.236121	-0.0766747	0.608387	-0.0463884	-0.260559	-2.53317	0.184582	0.512566
X124	EINEGGLLLPHYNS	-1.17124	-1.0487	-0.588828	-0.958923	-0.429832	-0.944587	-0.731915	-0.432875	-0.90241	0.416319	-0.427218	0.477791	0.630857	1.36484	1.4722	1.79906	-0.0716997	1.54715
X125	EITPEKNPQL	-0.0519605	0.0584983	-0.0405714	0.490377	1.73178	0.449022	0.884646	0.802774	0.62328	-0.541644	2.0064	-0.694598	-0.430431	-1.24727	-1.89638	-0.535033	-0.714	-0.894892
X126	EITPEKNPQLQD	0.95235	0.837881	0.56841	0.702747	1.4557	0.205202	0.619525	0.64281	0.739734	-1.03507	1.57071	-1.03016	-1.02984	-1.04993	-1.05072	-1.03271	-1.03483	-1.03181
X127	EITPEKNPQLQDL	-0.388679	-0.719268	-0.568345	-0.279352	1.53176	-0.925564	-1.47848	0.775411	-0.422544	-1.49896	2.6649	0.00371453	0.304231	0.116138	0.0250901	0.381777	0.0866386	0.391529
X128	EITPEKNPQLQDLD	-0.293483	-0.367681	-0.372922	-0.332052	2.68853	-0.415714	-0.284324	-0.285645	-0.43643	-0.275944	2.79763	-0.277257	-0.302813	-0.43759	-0.276714	-0.287848	-0.404449	-0.435296
X129	EITPEKNPQLQDLDI	-0.4957	-1.26281	-0.969885	-0.269306	1.87135	-0.579047	-0.498732	0.440863	-0.42308	-1.35514	2.39642	-0.00193576	0.707696	0.122346	1.13012	-0.075924	-0.505269	-0.231967
X130	EITPEKNPQLQDLDIF	-0.50505	-0.514619	-0.580697	-0.52503	2.25732	-0.50929	-0.502324	-0.500727	-0.607245	-0.0485537	2.9522	-0.304002	0.412482	-0.26849	0.311905	-0.0843909	-0.496395	-0.487092
X131	EITPEKNPQLQDLDIFV	-0.830143	-0.751528	-0.815182	-0.760057	-0.743003	-1.08132	-1.19485	2.19586	-0.742558	0.0156845	-0.65499	0.337435	0.795224	0.358346	0.189473	1.50755	1.03256	1.1415
X132	EITPEKNPQLQDLDIFVN	-0.919274	-1.01673	-1.00483	-0.905163	-0.904471	-0.986744	-1.1857	1.5993	-0.58309	1.28813	-0.903236	0.857741	1.13911	0.922194	0.857421	0.786086	0.368284	0.590959
X133	EITPEKNPQLQDLDIFVNS	-1.00218	-0.409591	-0.385183	-0.713645	-0.512933	-1.01779	-0.642044	1.93181	-0.370184	1.48737	-0.376155	-0.356524	-0.366712	0.0361936	-0.364647	2.35361	-0.370234	1.07885
X134	EITPEKNPQLQDLDIFVNSV	-0.943224	-1.03627	-0.924483	-0.935301	-0.963785	-0.926811	-1.0253	0.427252	-0.921515	1.15731	-0.921569	0.814461	1.13122	1.10298	1.03612	1.29026	0.878669	0.759985
X135	EITPEKNPQLQDLDIFVNSVEI	-0.510246	-0.808782	-0.700988	-0.48665	0.00875566	-0.535389	-0.170149	-0.257295	-0.564188	0.0204523	3.69001	0.0398746	0.0349578	0.048458	0.920441	-0.322882	-0.177185	-0.229194
X136	EITPEKNPQLQDLDIFVNSVEIK	-0.784144	-0.95307	-0.794409	-0.763994	-0.635525	-0.703097	-0.895255	-0.38903	-0.715589	1.6389	2.36679	0.643019	0.944045	1.2915	0.479045	-0.0169244	-0.077643	-0.634616
X137	EKIPGTEQS	-0.443753	1.7068	2.1946	1.49532	-0.441082	-0.438146	1.15385	-0.431785	0.990692	-0.588361	-0.92614	-0.78535	-0.810962	-0.438533	-0.654328	-0.460816	-0.636096	-0.485908
X138	ELAFPGSAQEVDR	-0.664519	-0.693394	-0.251973	-0.397171	1.8518	-0.178975	-0.695219	-0.731387	-0.81081	0.244903	3.09813	0.263979	0.0766896	-0.0514652	0.344505	-0.70756	-0.594034	-0.1035
X139	ELAFPGSAQEVDRL	-0.356084	-0.501062	-0.372328	-0.462167	2.8093	-0.467556	-0.387233	-0.326269	-0.478217	-0.313201	2.52178	0.583925	-0.322575	-0.337566	-0.314716	-0.427161	-0.513341	-0.335527
X140	ELAFPGSSHEVDR	-0.53729	-0.738442	-0.642075	-0.734195	-0.344129	-0.508845	-0.503238	-0.487659	-0.542897	1.53316	2.97684	1.03854	-0.320613	-0.311901	1.11086	-0.357112	-0.307184	-0.323827
X141	ELAFPGSSHEVDRL	-0.886692	-0.858528	-0.829811	-0.833183	-0.937498	-0.886002	-0.852759	0.0985943	-0.537362	3.12707	0.145398	0.350511	0.415597	0.414879	0.394354	0.717626	0.416715	0.541091
X142	ENDDEEEQEEETSTQVQ	-0.493983	2.02621	2.34906	1.23175	-0.497457	0.991874	0.764886	-0.492465	-0.508047	-0.595431	-0.736462	-0.568695	-0.495794	-0.492948	-0.692758	-0.493308	-0.760922	-0.535515
X143	EQIEELSKNA	0.614693	-0.133571	0.231497	0.0852675	-0.337892	0.803123	0.0937516	-1.50836	1.09335	1.14929	-1.53532	1.27146	1.14287	0.0375191	0.755744	-1.50755	-0.731522	-1.52436
X144	EQIEELSKNAK	-0.679428	-0.934044	-0.6975	-0.769145	-0.297601	-0.670582	-0.490671	-0.493197	-0.582671	-0.272676	2.93576	1.49898	-0.292153	1.19977	0.749061	-0.215227	0.282989	-0.271668
X145	EQSPGQWRP	-0.299112	-0.555095	0.544154	0.832604	-1.32184	0.931198	0.625842	-1.33526	-1.32451	-1.3229	-1.36921	0.809856	0.682891	0.798268	-0.712707	1.08989	1.22288	0.703049
X146	EQSPGQWRPS	0.520986	-0.549224	-1.08667	-0.417737	-0.873188	-0.496217	-0.95499	-0.492212	-0.43964	0.952088	-0.42995	-0.428946	0.732075	1.34217	0.566598	-0.422246	2.90218	-0.42507
X147	EQSPGQWRPSHGKEEDEEEKE	0.0161634	-0.400458	-1.06017	0.0161789	-0.639814	-0.553011	-0.697738	-0.912603	-0.587147	0.0197678	-0.249186	-0.00489594	0.0128265	0.0183163	0.0142185	0.010735	3.12615	1.87066
X148	EQSPGQWRPSHGKEEDEEEKEQ	-0.741678	-0.894824	-0.686661	-0.873295	-0.414465	-0.779519	-0.468501	-0.433482	-0.63109	0.169494	0.166862	-0.00160746	0.161657	0.0997169	0.168816	2.83914	2.14921	0.170227
X149	ETWNPNHPE	-0.756022	-0.239379	-0.24083	2.08555	-0.239471	2.11303	2.22679	-0.590543	-0.239547	-0.549923	-0.628452	-0.242119	-0.335904	-0.410908	-0.276105	-0.519865	-0.468789	-0.687523
X150	ETWNPNHPEL	0.606413	0.594343	0.780385	1.02542	0.757863	0.972998	1.10959	0.854107	1.03746	-1.19177	-1.18457	0.336899	-1.18993	0.243871	-1.18712	-1.19001	-1.19292	-1.18304
X151	EVDRLLTNQ	-0.71993	-0.710922	-0.958593	-0.480671	-0.468779	-0.655362	-1.19426	1.21517	-0.364606	1.8263	-0.134619	-0.126102	2.67515	0.719748	-0.144646	-0.155652	-0.148664	-0.17356
X152	EVDRLLTNQK	-1.01361	-0.882513	-0.757779	-0.846085	-0.719262	-0.855408	-1.06896	-0.701568	-0.797628	1.63283	0.544384	0.95602	1.46473	1.20755	-0.711613	0.94084	0.473159	1.13491
X153	EVDRLLTNQKQSH	-0.818195	-0.831146	-0.868251	-0.53944	-0.667828	-0.657548	-1.08523	0.18062	-0.550845	2.49523	0.174262	0.185455	2.4031	0.190201	0.186698	0.135185	0.184379	-0.116649
X154	EVESSDTIDNV	2.3506	2.02023	1.91451	0.4647	-0.382305	-0.388853	-0.380862	-0.386787	-0.877801	-0.457189	-0.432431	-0.445774	-0.514404	-0.521611	-0.675096	-0.389026	-0.511493	-0.386417
X155	FDKRSDLFENLQNY	-0.146256	-0.315575	-0.507877	-0.257198	-0.303943	-0.453624	-0.705305	-0.145883	-1.05979	-0.146002	-0.543026	-0.14242	2.69595	-0.155652	2.63063	-0.141885	-0.150885	-0.151273
X156	FEITPEKNPQ	0.455744	0.604895	0.701214	1.21764	-1.45269	-1.45937	1.05718	-1.46451	-1.45638	0.886299	-0.330338	0.464735	-1.2	0.418031	-0.661414	0.727725	0.855526	0.635721
X157	FEITPEKNPQL	-0.298035	-0.321955	-0.332809	-0.370462	2.79662	-0.273798	-0.289246	-0.40933	-0.390741	-0.284338	2.68614	-0.292142	-0.297248	-0.439773	-0.206343	-0.342441	-0.477106	-0.456986
X158	FEITPEKNPQLQD	-0.062083	-0.0762227	-0.701355	-0.172608	1.76341	-0.742045	-0.0566666	-0.0176588	-0.952283	-0.698469	2.32895	-0.918085	-0.952266	-0.661489	-0.949539	1.25612	0.70691	0.90538
X159	FEITPEKNPQLQDL	-0.651547	-0.952511	-1.15033	-1.19683	1.12615	-1.13802	-0.950449	-1.20246	-1.21895	0.83087	1.2888	0.683371	0.932588	1.05119	0.407033	0.63777	0.655069	0.848263
X160	FEITPEKNPQLQDLDI	-0.670605	-0.745717	-0.807709	-0.674997	1.25065	-0.711944	-0.68689	0.510186	-0.702541	0.755484	3.20578	-0.661991	-0.0623332	-0.366878	0.163444	0.263432	0.154688	-0.212066
X161	FEITPEKNPQLQDLDIF	-0.917595	-1.00364	-0.935268	-0.929418	-0.918685	-0.91752	-0.921714	-0.917502	-1.11396	0.679679	1.6074	0.812115	0.863778	0.85657	0.987747	1.10574	0.951861	0.710404
X162	FEITPEKNPQLQDLDIFV	-0.666087	-0.654922	-0.45868	-0.621756	-0.461521	-0.948887	-0.619894	-0.465513	-0.818808	-0.454319	1.38577	-0.354419	-0.245424	-0.184752	-0.0668139	2.04566	2.08183	1.50854
X163	FEITPEKNPQLQDLDIFVN	-0.825393	-0.972406	-0.83223	-0.874863	-0.877458	-0.823965	-0.857798	-0.823199	-0.885839	1.35724	-0.832803	0.976601	0.9954	1.08178	1.26252	0.707082	1.26706	0.958277
X164	FEITPEKNPQLQDLDIFVNS	-0.790293	-0.688292	-0.484494	-0.72044	-0.484087	-1.02273	-0.665439	-0.485694	-0.821229	-0.201645	1.4601	-0.0549987	-0.481955	0.080176	-0.115961	2.06675	1.72035	1.68988
X165	FEITPEKNPQLQDLDIFVNSV	-0.458087	-0.949638	-0.790787	-0.846396	-0.756226	-0.560673	-0.829325	-0.829007	-0.462481	1.27159	-0.462054	1.78312	0.533248	1.78644	1.52302	-0.457093	0.934098	-0.429758
X166	FEITPEKNPQLQDLDIFVNSVEI	-0.663645	-0.929641	-0.63155	-0.89386	-0.462343	-0.679532	-0.709077	-0.634034	-0.667572	1.46215	-0.0620569	1.8505	0.0872167	0.08984	2.62157	0.0815491	0.0528091	0.0876741
X167	FEITPEKNPQLQDLDIFVNSVEIK	-0.763286	-0.917946	-0.795028	-0.833185	-0.890456	-0.763145	-0.956204	-0.790466	-0.76292	1.26699	-0.762525	1.53029	0.950535	1.71548	0.852675	0.13353	0.755124	1.03053
X168	FELVGQRNENQQEQ	-0.862976	-0.847333	-0.895483	-0.487253	-0.59766	-0.667849	-1.01251	0.120133	-0.548853	2.3557	0.0894137	0.122563	2.56265	0.381754	0.119516	0.0719515	0.197396	-0.101167
X169	FEVTPEKKYPQLQDLDL	-0.509221	-0.799792	-0.627197	-0.768206	-0.346301	-0.749214	-0.358427	-0.444604	-0.843153	-0.342931	1.9689	-0.440026	0.152006	-0.351852	0.694508	2.16466	1.9439	-0.343049
X170	FFEITPEKNPQL	0.124469	-0.383847	-0.970871	-0.727646	-0.0134138	0.463006	-0.929893	-0.93894	-0.9759	1.23875	0.2667	1.40533	1.30712	1.34142	1.63478	-0.952782	-0.934425	-0.953862
X171	FFEITPEKNPQLQ	0.125298	-0.3123	-0.137313	-0.523562	-0.742228	0.898505	-1.03893	-1.07625	-1.09378	1.39096	1.67698	1.19393	0.42738	0.918403	1.27707	-1.03513	-0.950896	-0.998144
X172	FFEITPEKNPQLQD	-0.823173	-0.658274	-0.580031	-0.627917	-0.346599	-1.50909	-1.06428	2.31123	-0.343011	1.04169	2.14856	0.179922	0.034786	0.0813309	0.513001	-0.339744	-0.164675	0.146281
X173	FFEITPEKNPQLQDL	-0.737113	-0.977045	-0.923841	-0.796499	-0.366955	-0.607533	-1.04676	-0.610524	-0.917374	2.09556	1.98056	0.736387	0.888425	0.78801	0.844473	-0.459602	0.013466	0.0963656
X174	FFEITPEKNPQLQDLD	-0.676167	-0.303061	-0.442429	-0.438721	-0.31908	-1.30179	-1.34332	2.93217	-0.299148	0.699678	0.814739	0.141797	1.52646	-0.295844	-0.0367744	-0.307887	-0.289326	-0.0612947
X175	FFEITPEKNPQLQDLDI	-0.745278	-0.744241	-0.747978	-0.771009	-0.746969	-1.2124	-0.840968	2.20248	0.327253	0.0427451	2.16735	0.623089	-0.105652	0.541405	1.02908	-0.743866	-0.166743	-0.108298
X176	FFEITPEKNPQLQDLDIF	-0.601939	-1.11224	-0.912489	-0.875787	-0.621853	-0.6208	-0.614174	-0.606721	-0.901896	-0.607895	1.95622	1.24304	1.17738	1.09226	1.42578	0.433492	0.751198	-0.603578
X177	FFEITPEKNPQLQDLDIFVN	-0.823135	-0.932167	-0.824453	-0.819698	-0.89536	-0.829392	-0.828333	-0.819673	-0.830907	1.3918	-0.816658	1.30653	1.26226	1.21906	1.36235	0.334566	0.857572	0.685646
X178	FFEITPEKNPQLQDLDIFVNS	-0.797135	-0.911174	-0.900474	-0.793732	-0.885632	-0.793631	-0.80936	-0.795589	-0.799879	1.493	-0.792648	1.31991	1.13011	1.24494	1.20814	-0.0223908	0.795813	1.10973
X179	FFEITPEKNPQLQDLDIFVNSV	-0.227709	-0.636015	-0.699141	-0.978122	-0.966869	-0.961756	-1.0711	-0.967661	-1.11502	1.3709	-0.760402	1.15595	1.36499	1.2191	0.983397	0.789452	0.91263	0.587387
X180	FFEITPEKNPQLQDLDIFVNSVEIK	-0.861977	-1.01939	-0.953898	-0.877089	-0.87324	-0.862502	-0.967711	-0.869967	-1.00066	1.40657	0.491759	1.32529	1.04009	1.4504	1.19694	0.203292	0.50082	0.67129
X181	FFEVTPEKKYPQLQDL	-0.863998	-0.888214	-0.909344	-0.677763	-0.539335	-0.783215	-1.1158	0.338744	-0.373446	2.19807	-0.090587	0.297969	2.05529	1.59998	0.111686	-0.185058	-0.0947957	-0.080183
X182	FFEVTPEKKYPQLQDLDL	-0.620733	-0.806811	-1.01335	-0.624918	-0.795351	-0.786078	-0.839706	-0.50209	-0.632138	0.12664	-0.613971	1.7912	0.511768	1.10733	1.8703	-0.61212	1.21975	1.22027
X183	FFEVTPEKKYPQLQDLDLL	-0.549827	-0.770226	-0.646704	-0.632998	-0.582916	-0.568908	-0.609837	-0.923291	-0.851249	-0.160925	-0.476005	2.20893	0.2122	1.34958	2.1253	-0.476763	0.591736	0.761911
X184	FGKFFEITPEKNPQLQDL	-0.910091	-0.900717	-0.875516	-0.837015	-0.88113	-0.857836	-0.973248	0.0395291	-0.523893	3.03525	0.218503	0.422878	0.565644	0.864461	0.419867	0.411837	0.393696	0.387783
X185	FGKFFEITPEKNPQLQDLDIFVNSV	-0.438845	-0.938922	-0.773208	-0.85696	-0.512116	-0.685948	-0.723041	-0.782131	-0.673666	1.45181	-0.454235	1.4869	-0.272448	1.68828	1.98816	-0.424013	0.825474	0.0948999
X186	FLPQFTDADF	-0.772164	-0.676781	-0.583968	-0.694576	-0.648683	-0.500796	-0.889832	0.128219	0.330082	1.61255	-0.481735	1.9162	1.89252	1.5074	-0.483627	-0.690004	-0.482317	-0.482482
X187	FLPQFTDADFI	-0.974388	-0.787759	-0.949949	-0.153862	-0.977326	-0.958493	-0.325006	-0.750069	-1.02631	1.51582	-0.965934	1.11606	1.78272	0.798628	1.42854	0.628142	0.272447	0.326734
X188	FLPQQTDADF	-0.628427	-0.829808	-0.624095	-0.704507	-0.99041	-0.636537	-0.734576	-0.643168	0.558625	1.49414	-0.18344	1.5148	1.91762	1.35602	-0.645167	-0.635612	1.04284	-0.628286
X189	FLPQQTDADFI	-0.752775	-0.83744	-0.674979	-0.698384	-0.763741	-0.587482	-0.963469	-0.394011	-0.619169	2.53495	-0.382486	1.68819	1.00257	0.871231	0.717003	-0.382763	-0.386977	0.629731
X190	FLPQQTDADFILV	-0.505394	-0.518786	-0.704822	-0.534779	-0.505212	-0.521984	-1.07506	1.66728	-0.499682	-0.504618	-0.512006	0.954668	2.52445	0.877294	1.30652	-0.505535	-0.436163	-0.506179
X191	FLPQYTDAD	-0.470902	-0.552924	-0.640227	-0.468307	-1.11377	-0.578231	-0.750445	-0.929263	-0.44972	1.847	-0.459222	1.35699	-0.452542	1.00229	-0.445959	-0.262007	1.56159	1.80564
X192	FLPQYTDADFI	-0.881398	-0.801887	-0.651876	-0.674878	-0.681727	-0.520797	-0.931218	-0.263936	-0.783767	1.90648	-0.340755	0.779523	2.6072	0.142137	0.119805	1.09665	0.0186567	-0.138221
X193	FLPQYTDADFILVVLSGK	-0.866201	-0.773881	-0.398699	-0.812918	-0.557162	-0.67991	-0.780513	-0.393848	-0.82468	0.113174	-0.202779	0.531842	1.28402	-0.257695	-0.390874	2.80172	1.35019	0.858203
X194	FLTGSDDNVISQ	-0.472674	-0.198466	-0.196197	1.3948	3.28562	-0.194565	1.12764	-0.20357	-0.514531	-0.530737	-0.205741	-0.26566	-0.222157	-0.350356	-0.196449	-0.845335	-0.820076	-0.591542
X195	FLTLFENENGHI	-0.715633	-0.749625	-0.477426	-0.644498	-0.664565	-0.51657	-0.646409	-0.871989	-0.823286	0.964603	-0.47746	2.47112	0.251488	1.10334	1.75393	-0.474848	-0.34805	0.865869
X196	FLTLFENENGHIR	-0.671216	-0.871064	-0.8365	-0.717354	-0.140751	-0.872774	-0.971989	-0.127913	-0.752129	-0.124787	-0.269355	-0.122761	1.1084	2.2548	1.86548	-0.141599	-0.136089	1.52759
X197	FNLEEGDIM	-0.810716	-1.1437	-0.629974	-1.08037	-0.802742	-0.655247	-0.799802	0.486384	-0.624121	2.11107	-0.623081	1.62665	-0.412784	0.709537	1.10194	1.09931	-0.247071	0.694711
X198	FNRAEDLATAMEAR	-0.0750455	-0.748058	-0.743348	-0.756091	0.107128	-0.775809	-0.745807	-1.161	-0.787905	1.08726	-0.735325	1.39948	-0.738451	1.33193	1.58312	-0.738446	1.29294	1.20342
X199	FNTDYEEIEK	-0.899604	-0.685864	-0.680383	-0.683158	-0.780267	-0.793917	-1.03569	1.56251	1.76294	0.996101	-0.680213	-0.688428	0.938938	-0.682776	-0.689205	0.939526	0.836145	1.26335
X200	FNTDYEEIEKV	0.379804	0.338864	0.669451	2.04876	-0.56594	1.64123	2.21663	-0.572292	-0.566637	-0.577992	-0.591844	-0.555401	-0.572677	-0.614236	-0.584604	-0.762905	-0.585226	-0.744989
X201	FNTEYEEIEKV	0.925163	0.970656	0.824696	1.24001	-0.829734	1.23477	1.44728	1.34345	0.528491	-0.846802	-0.829716	-0.830074	-0.832736	-0.830428	-0.832777	-0.832192	-0.832113	-1.01794
X202	FNTEYEEIEKVL	-0.604154	-0.923134	-0.887728	-0.772449	-0.831219	-0.621174	-0.901375	0.75397	-0.333486	2.60082	-0.355777	0.92913	0.747596	0.488377	1.71501	-0.340354	-0.329735	-0.334318
X203	FNTEYEEIEKVLL	-0.811846	-0.914056	-0.805329	-0.833029	-0.808183	-0.811535	-0.803088	-0.801966	-0.971711	0.920031	-0.805876	1.46965	1.02836	1.0698	1.73949	0.584255	0.47351	1.08152
X204	FNTEYEEIEKVLLEEQEQK	-0.528554	-0.661685	-0.71626	-0.85342	-0.555422	-1.0162	-0.691483	-0.0719753	-0.399719	2.49793	-0.098631	-0.0695156	-0.0733219	-0.0713441	2.35145	-0.0823231	-0.0777229	1.1182
X205	FQTLYENENGHI	0.582947	-0.223184	0.196924	-0.305188	-1.23449	0.247239	-0.429066	-1.26677	-1.24475	1.62665	-1.26595	1.36269	0.369841	1.23376	1.45387	-1.23466	-0.203314	0.333455
X206	FQTLYENENGHIR	-0.740716	-1.09455	-0.885807	-0.711971	0.30728	-0.679014	-0.809773	-0.670021	-0.961441	0.237262	2.76378	0.954798	0.691816	0.78664	1.02665	-0.668878	0.0412817	0.412662
X207	GDAMVNILSGEAEITIEGTI	-0.458203	-0.834592	-1.02154	-0.45932	-0.615005	-0.549279	-1.06535	0.907268	0.179739	2.38246	0.812226	-0.450851	1.76504	-0.453761	-0.506809	-0.452929	1.27917	-0.458255
X208	GDTIKLPAGTI	-0.786144	-0.882283	-0.788852	-0.33912	-0.542526	-0.227718	-1.12485	-0.421161	-1.02802	0.397167	-0.391303	2.10512	2.60188	0.398051	0.395117	0.0566801	0.180392	0.397571
X209	GDTIKLPAGTIA	-0.426151	-0.453586	-0.408704	-0.433357	-1.04279	-0.427585	0.177271	-0.454727	-0.417265	2.13646	-0.395919	-0.401836	-0.398765	-0.509093	-0.416945	2.23282	1.99694	-0.356766
X210	GDTIKLPAGTIAY	-0.602329	-0.576488	-0.656979	-0.593247	2.42614	-0.613699	-0.549548	-0.509496	-0.671019	-0.52585	1.92454	-0.531839	1.27429	-0.502286	0.770201	0.983474	-0.526486	-0.519369
X211	GDTIKLPAGTIAYL	-0.702586	-1.04375	-0.883955	-0.745013	0.845522	-0.713002	-0.893311	-0.704823	-0.941488	0.964594	2.63955	0.962008	0.718044	0.249107	0.880141	-0.701518	-0.0196809	0.0901551
X212	GDTIKLPAGTIGYL	-0.510936	-0.775182	-0.50666	-0.558437	1.80583	-0.544433	-0.578241	-0.503982	-0.598694	1.00171	2.82393	0.713929	-0.500031	0.620806	-0.514342	-0.512887	-0.577291	-0.285085
X213	GFGINAENNER	0.272901	-1.09552	-1.09779	-1.09207	1.49366	-1.0951	-1.1125	1.00722	-1.0978	-1.0907	-0.371671	0.916789	-0.205821	0.908215	1.03274	0.853991	0.752337	1.02111
X214	GFGINAENNERN	-0.886781	-0.711952	-0.732859	-0.644947	0.084412	-0.204835	0.113578	0.0950895	3.56922	0.0954688	-0.860697	0.118719	-0.0736118	0.26722	0.737361	0.0726592	-0.433207	-0.604843
X215	GFGINAENNERNF	-1.03909	-0.635789	-0.624526	-0.742374	-0.159022	-0.965433	-0.868414	-0.0418317	-0.695367	1.3617	-0.0544547	0.0766134	0.139979	-0.0418078	-0.0431892	1.49929	-0.0372811	2.87099
X216	GFGINAENNERNFL	-0.210933	-0.789771	-1.23556	-0.931214	-0.231872	0.154136	-1.21574	-1.21236	-1.23888	0.692624	-0.475267	1.47286	1.03419	1.44213	1.72744	0.214307	0.417616	0.3863
X217	GFGINAENNQR	-0.629783	-0.870528	-0.89585	-0.57738	1.83433	-1.07656	-0.762332	-0.568744	-0.559333	-0.0128528	2.01837	-0.557305	-0.557333	1.25202	-0.571363	0.453755	0.976179	1.1047
X218	GFGVNAENNQ	-0.858251	-0.950032	-0.768316	-0.943259	-0.779051	-0.767819	-0.811952	-0.775165	-0.856864	0.471145	-0.768234	1.75529	0.675021	1.21344	1.40619	1.09473	0.437943	1.22519
X219	GINAENNER	-0.35164	-0.416305	-0.408405	-0.343335	3.00484	-0.367843	-0.35709	-0.347354	-0.485303	-0.346895	2.41013	0.163651	-0.230629	-0.350435	-0.319859	-0.3288	-0.477999	-0.446729
X220	GINAENNQR	-0.672825	-0.826622	-0.688275	-0.647833	0.0949531	-0.828624	-0.690669	-0.228397	-0.596898	0.359828	3.5942	0.456919	0.107823	0.215909	0.22159	-0.0336444	0.156401	0.00616689
X221	GKFFEITPEKNPQ	0.90704	3.35342	0.962502	0.43623	-0.258465	0.220885	0.383028	-0.463996	-0.481702	-0.494191	-0.203063	-0.577123	-0.564315	-0.657039	-0.692305	-0.461423	-0.864901	-0.544584
X222	GKFFEITPEKNPQLQDL	-1.10708	-0.935785	-0.638593	-1.04094	0.163733	-0.914696	-0.632412	0.0850714	-0.483871	0.270568	-0.0777042	0.110014	0.211035	0.167681	0.118587	3.26993	0.757061	0.677392
X223	GLHLPSFSPSP	1.40849	1.31684	0.257507	-0.490484	-1.34438	0.8278	-1.34963	-0.341099	-1.36906	0.117112	-1.36562	0.575971	0.316494	0.445606	-1.35492	0.927722	1.18742	0.234237
X224	GLHLPSFSPSPQ	1.08883	0.941505	0.820338	0.84763	-1.1963	0.91315	0.826154	0.690771	0.754953	0.327185	0.476241	-1.20235	-1.19497	-1.19626	-1.2293	-1.19375	0.726154	-1.19997
X225	GLTETWNPNHP	-0.70763	-0.64473	-0.25255	-0.624697	-0.49051	-0.884243	-0.562629	-0.305024	-0.495611	-0.230494	-0.248452	-0.234977	-0.238082	-0.231839	-0.233279	2.2629	2.03451	2.08733
X226	GLTETWNPNHPEL	1.39214	1.06653	1.58551	1.27182	-0.409169	1.20032	1.19094	-0.0369265	0.0780828	-1.10556	-1.10436	-0.643064	-0.190941	-1.09597	-0.654309	-0.811114	-0.670961	-1.06297
X227	GNLELVGFKNEQQE	-0.587525	-0.774727	-0.524013	-0.789659	-0.186345	-0.836178	-0.458119	-0.567172	-0.712991	1.22457	-0.252605	0.879841	-0.185209	0.397047	3.2254	-0.187909	-0.255485	0.591076
X228	GTKPEYGSTNT	-0.0547086	2.58553	2.61819	0.706902	-0.271063	-0.148541	-0.100057	-0.249844	-0.465992	-0.51112	-0.691788	-0.546493	-0.503165	-0.48866	-0.751725	-0.24764	-0.559146	-0.320673
X229	GTKPEYGSTNTGSG	2.4472	2.08471	1.80183	-0.387305	-0.264934	-0.389956	0.164189	-0.401571	-0.480247	-0.428929	-0.143026	-0.500092	-0.779749	-0.542864	-0.662003	-0.392196	-0.713013	-0.412046
X230	GVNAENNQR	-0.326687	-0.38928	-0.419505	-0.368624	2.6595	-0.444297	-0.320998	-0.328735	-0.511057	-0.318491	2.80205	-0.335797	-0.0899978	-0.389083	-0.0573263	-0.322876	-0.456224	-0.382578
X231	GVSSESEPF	-1.04342	-1.00772	-0.68687	-1.08458	-0.679821	-0.912829	-0.675918	-0.674396	-0.667903	0.85238	1.79403	1.15171	-0.668758	1.06641	0.101127	1.53653	0.591066	1.00895
X232	HAGDLGNINVGDDGTVS	2.66405	1.03336	2.44169	-0.441635	-0.248093	-0.248963	-0.32486	-0.250325	-0.754075	-0.323893	-0.319733	-0.438248	-0.559858	-0.549632	-0.632927	-0.251311	-0.504523	-0.291026
X233	HAIVKVSREQIEELR	-0.416305	-0.4724	-0.452213	-0.428872	-0.424259	-0.703714	-0.889029	-0.416397	-0.838195	-0.418107	-0.421391	-0.419663	1.49361	-0.420541	-0.419364	1.73123	1.7361	2.17951
X234	HLPSFSPSP	0.869229	0.818468	0.733039	0.811682	0.171327	0.939041	0.691159	-1.35027	-1.34973	0.741586	0.694346	0.599444	0.524551	0.541142	-1.35542	-1.34944	-1.37266	-1.35749
X235	HLPSFSPSPQ	1.46761	1.39869	-0.641754	1.51609	-0.634985	1.41465	-0.640431	-0.638869	-0.6395	1.09467	1.27898	-0.635334	-0.639938	-0.640412	-0.634899	-1.09851	-0.637649	-0.688409
X236	IAGDSIGEEVEK	-0.645577	-0.796779	-1.02603	-0.600693	-0.475647	-0.873606	-1.15917	-0.47735	-1.03112	1.56057	1.7437	0.828728	1.57691	-0.474967	-0.470008	0.681617	0.763449	0.875975
X237	IAPVDTKPQTGGGY	-0.381994	-0.398738	-0.452369	-0.474706	2.45021	-0.610679	-0.365826	-0.394383	-0.557333	-0.372644	2.91664	-0.365668	-0.365556	-0.36685	-0.368451	0.22692	0.0936643	-0.21224
X238	IESEGGLIET	-1.3055	-1.24323	1.05138	-1.2362	-1.28966	1.50625	0.590605	-0.256612	0.887711	0.157893	-1.23545	0.462747	0.0619731	0.325351	-1.23875	1.05953	0.876101	0.82585
X239	IESEGGLIETWNPNN	1.16846	0.826076	-0.868164	1.07052	0.0508429	1.33735	1.08332	0.93724	1.16731	-0.868746	0.776851	-0.866289	-0.946303	-0.879364	-0.866541	-1.2361	-0.86836	-1.01811
X240	IESEGGLIETWNPNNR	0.0585663	-0.266261	-0.395442	-0.269967	1.55872	-0.63666	-0.273061	-0.292619	-0.523005	-0.266504	3.5515	-0.276967	-0.423155	-0.329433	-0.270914	-0.388866	-0.268898	-0.287029
X241	IKEGSLLLPN	2.42803	2.5628	-0.341989	-0.329371	-0.341519	1.3079	-0.447229	-0.344589	-0.337696	-0.59367	-0.386669	-0.382756	-0.56605	-0.631288	-0.326617	-0.345275	-0.586672	-0.337337
X242	INEGGLLLPH	1.45742	1.32441	1.06217	1.19374	0.0121936	0.506394	1.13477	0.487562	0.400559	-1.02822	0.56962	-1.02043	-1.02244	-1.01911	-1.02488	-1.01888	-0.985989	-1.02888
X243	ISLTDTGSSNNQ	1.97361	1.71912	-0.645994	0.863117	1.54012	0.0391388	-0.642621	0.724875	-0.575391	-0.66705	0.933554	-0.715876	-0.703166	-0.746164	-0.649709	-0.943466	-0.853764	-0.650328
X244	ISLTDTGSSNNQLDQMPR	1.5289	0.978869	-0.274494	-0.586197	1.78281	-0.571659	-0.588771	0.601389	0.19522	-0.589754	2.31428	-0.575254	-0.841223	-0.686304	-0.734011	-0.686391	-0.694159	-0.573251
X245	KEDEDEDEE	-0.820453	-0.722657	-0.692582	-0.693562	-0.68672	1.32973	1.85091	-1.69268	-0.682012	0.847951	0.336213	1.22362	-0.68418	0.944857	0.592619	-0.688504	-0.688863	0.926309
X246	KEDEDEDEEE	-1.12949	-0.854834	-1.50996	0.128751	-0.86062	2.44316	-0.848776	-0.847632	-0.841885	-0.0385427	-0.26856	0.930953	0.83881	0.271715	0.320782	1.16148	0.379387	0.725267
X247	KEDEDEDEEEE	-0.964692	-0.319298	-0.34708	-0.311834	-0.337756	2.70866	1.6951	-0.932742	-0.320777	-0.183216	-0.612156	-0.26246	-0.318699	-0.39477	-0.318034	1.84898	-0.321511	-0.307712
X248	KEDEDEDEEEEE	-0.606826	-0.594644	0.23054	-0.588785	-0.60175	-0.713512	-0.585734	-0.814146	-0.798788	-0.389655	-0.611045	0.866983	0.048393	-0.143058	-0.586796	1.64239	2.07025	2.17619
X249	KEDEDEDEEEEEE	-0.878515	-0.943069	-0.705414	-0.95113	-0.101998	-0.815709	-0.539578	-0.284915	-0.547306	0.21815	0.113884	-0.0334101	0.219977	0.0795494	0.18632	3.10577	1.65623	0.221165
X250	KEDEEKVVEEEEGE	1.78099	1.06914	2.32669	0.690972	-0.552624	-0.296079	-0.257656	1.5089	-0.545334	-0.874049	-0.545222	-0.546051	-0.559666	-0.78308	-0.652213	-0.54817	-0.674562	-0.54198
X251	KEDEEKVVEEEEGEW	1.31255	1.15441	1.38852	1.38562	0.329489	1.21842	1.19297	-0.80012	-0.800755	-0.79994	0.345484	-0.803648	-0.839588	-0.897388	-0.811758	-0.813874	-0.800226	-0.960161
X252	KEDEEKVVEEEEGEWRGS	2.42273	2.01673	2.00109	-0.325611	-0.327564	-0.388097	-0.317284	-0.312882	-0.70952	-0.348477	-0.32653	-0.365667	-0.521311	-0.541784	-0.60789	-0.32183	-0.695043	-0.331067
X253	KEDEEKVVEEEEGEWRGSQ	2.03697	1.71478	1.27576	0.960596	-0.081284	-0.691982	0.456822	1.25152	-0.193778	-0.723577	-0.692788	-0.787704	-0.873704	-0.789702	-0.764402	-0.695025	-0.709198	-0.693304
X254	KEEAWTLFEKHS	-0.815203	-0.693423	-1.19072	-0.5577	-1.3055	-0.791743	-0.89972	-0.888626	-1.32012	0.722981	1.54234	0.893504	0.842983	0.850555	0.727818	0.849404	1.03557	0.997591
X255	KELAFPGSAQEVDRLLENQKQS	-0.723723	-0.918427	-0.796174	-0.971956	-0.532726	-0.662703	-0.896868	-0.262449	-0.0770902	1.96715	-0.0102457	1.11518	-0.000471172	2.70872	0.0161451	-0.00115859	0.0232695	0.0235205
X256	KGVSSESEPF	-0.628077	1.2845	1.30908	1.46909	1.27414	-0.640501	1.43459	-0.63259	1.42074	-0.629544	-0.651123	-0.920931	-0.860872	-0.433793	-0.609394	-0.644213	-0.799944	-0.741155
X257	KGVSSESEPFNLR	-0.649138	-0.787361	-0.679185	-0.610942	0.0844819	-0.820515	-0.677646	-0.232725	-0.611107	0.507607	3.62256	0.262813	0.0933894	0.124342	0.209704	-0.0512635	0.189245	0.025741
X258	KSKPHTIFLPQFTDADFILVVLSGK	-0.898278	-0.90844	-0.621699	-0.935046	0.0287544	-0.864468	-0.558943	-0.212197	-0.523878	0.0321488	0.0399669	0.0108205	0.0396175	0.0215888	0.0174068	3.179	1.46203	0.691613
X259	KSLPSEFEP	-0.704028	-0.64557	-0.247091	-0.532029	-0.521139	-0.876107	-0.591593	-0.32825	-0.492271	-0.237168	-0.248044	-0.23803	-0.240591	-0.23545	-0.257385	2.03922	2.12061	2.23492
X260	KSLPSEFEPF	-0.854325	-0.859274	-0.893946	-0.800989	-0.862304	-0.885477	-0.955362	0.106136	-0.480106	3.16582	0.440937	0.339399	0.433269	0.434288	0.440792	0.435038	0.406519	0.389587
X261	KVLLEDQEQEPQ	2.85354	2.54053	-0.16693	-0.189066	-0.474113	-0.183821	-0.470121	-0.171799	-0.711974	-0.178773	-0.219535	-0.211697	-0.200643	-0.596735	-0.478039	-0.190433	-0.682195	-0.268192
X262	KVVEEEEGEWRGSQ	3.52118	0.824539	0.390834	0.000934429	0.0548928	-0.0979036	-0.837843	-0.0651442	-1.18561	-0.333863	-0.285819	-0.433029	0.274592	-0.664186	-0.594711	0.14518	-0.114884	-0.599163
X263	LAFPGSAQEVDRLLENQ	-0.574183	-0.927794	-0.692549	-0.721769	-0.74502	-0.428395	-0.795875	-0.406504	-0.416226	2.28223	-0.414618	1.61048	1.11448	0.554923	1.75907	-0.419399	-0.369119	-0.409723
X264	LAFPGSAQEVDRLLENQK	-0.656336	-0.805592	-0.882432	-0.648416	-0.650567	-0.772062	-0.936436	0.368603	-0.642723	1.0246	-0.640475	0.288977	1.95091	0.624831	2.51584	-0.377941	-0.0127254	0.251939
X265	LAGEEDNVISQI	-0.642867	-0.831951	-0.673031	-0.646888	3.22594	-0.219867	-0.243445	-0.00469407	-0.658603	0.399855	-0.648396	0.650109	1.04054	0.533203	0.665645	-0.642687	-0.662733	-0.640127
X266	LAGEEDNVISQIQRP	-0.940197	-0.876676	-0.581898	-0.883654	-0.54099	-0.48958	-0.88418	-0.70206	-0.486041	1.62173	-0.0239923	2.96434	0.667937	0.370069	0.284785	0.156347	0.0744149	0.269649
X267	LAGEEDNVISQIQRPV	-1.22002	-1.35398	-0.783334	-0.706636	-1.21393	0.619748	0.238505	-1.22417	-1.21885	0.828018	-0.181368	0.701487	1.88207	0.843858	0.496006	0.423715	1.05649	0.812385
X268	LAGEEDNVISQIQRPVKEL	-0.938755	-0.599444	-0.352648	-0.721405	-0.264644	-0.879318	-0.596112	0.0585613	-0.601137	-0.273426	-0.266807	-0.294611	0.437049	-0.263794	-0.263333	2.91131	1.07802	1.8305
X269	LANRDDNED	-0.831263	-0.529495	-0.556599	-0.625641	-0.103915	-0.366508	0.0758185	0.526193	3.67068	0.0470454	-0.817347	-0.0479037	-0.205243	0.0627087	0.414168	0.25657	-0.480106	-0.489162
X270	LANRDDNEDL	-0.510745	1.00722	1.29324	1.2586	-0.384473	-0.388929	1.15008	-0.384163	2.59085	-0.393292	-1.07117	-0.807413	-0.737439	-0.38963	-0.390215	-0.432388	-0.665343	-0.744796
X271	LDALEPDNRIESEGG	1.78268	2.46044	1.63741	1.13825	-0.400457	-0.393203	-0.389589	-0.406955	-0.930469	-0.530983	-0.542574	-0.459442	-0.476143	-0.507752	-0.648907	-0.418868	-0.518936	-0.394511
X272	LDALEPDNRIESEGGLIET	-0.489235	-0.571637	-0.401934	-0.563774	-0.32241	-0.934002	-0.624868	-0.59485	-0.720246	-0.3217	2.40505	-0.31805	-0.332653	-0.321016	-0.319228	1.60117	2.06436	0.765021
X273	LEDQEQEPQH	-0.272798	2.233	1.48998	-0.264646	-0.256552	1.70898	1.54414	-0.715799	-0.254339	-0.438776	-0.622894	-0.421758	-0.356708	-0.549044	-0.575209	-0.277462	-1.27296	-0.697147
X274	LEEQENEPH	-2.0922	0.250403	1.01772	0.455238	-2.08035	0.725051	0.609867	0.367436	0.748856	-0.0553118	-2.08706	0.0892929	0.359412	0.118152	0.0636438	0.658003	0.633143	0.218708
X275	LEPDNRIESEGGL	1.18829	1.55141	1.13907	1.50795	1.68189	-0.622477	1.0792	-0.625232	-0.622514	-0.755616	-0.622496	-0.667132	-0.92382	-0.663263	-0.636841	-0.704495	-0.679567	-0.624345
X276	LFENLQNYR	-0.570922	-1.04057	-0.853486	-0.942063	-0.0307436	-0.748525	-0.646597	-0.348183	-0.243391	0.143654	-0.287125	0.157329	0.162349	2.70524	2.30051	-0.0630578	0.155276	0.150299
X277	LGGNPETEFPETQEEQQGR	-0.247431	-0.282201	-0.296352	-0.285511	1.95017	-0.562731	-0.314063	-0.350839	-0.479958	-0.290878	3.36603	-0.284802	-0.338662	-0.386922	-0.294044	-0.300183	-0.306029	-0.295595
X278	LHLPSFSPSP	-0.819579	-1.05679	-0.620798	-0.626783	-0.101735	-0.358635	-0.82838	-0.621507	-0.377908	0.07023	0.0566048	2.35123	0.0871101	2.74138	0.0823485	0.0824162	-0.0769157	0.0177074
X279	LIETWNPNN	2.36214	1.78096	1.41017	1.0056	-0.55148	-0.204154	0.874017	-0.545681	-0.610503	-0.550515	-0.601695	-0.601544	-0.864543	-0.581677	-0.660241	-0.547871	-0.568051	-0.544937
X280	LLEDQEQEPQH	0.802613	0.816175	0.518653	1.04609	-1.75351	1.26673	0.867047	0.979854	0.85799	-0.249953	-1.73042	-0.0723711	-0.290578	0.129549	-0.0038487	-0.69174	-0.771061	-1.72121
X281	LLSGTQNQPS	0.725608	0.817291	0.776449	0.894478	0.494892	0.908627	0.850804	0.762952	0.704821	-1.3546	0.397609	-1.35166	0.377653	0.429197	-1.35342	-1.35896	-1.36254	-1.3592
X282	LLSGTQNQPSFL	-1.10012	-1.2833	-1.28647	-1.09734	2.06402	0.0324747	-0.74733	-0.708114	-1.2954	0.292683	1.48424	0.538346	0.539732	0.47108	0.652601	0.435574	0.316806	0.690522
X283	LLSGTQNQPSFLSGFSK	-0.775887	-0.887131	-0.66258	-0.687201	-0.657219	-0.972614	-0.74123	-0.650642	-1.035	-0.648966	1.51395	0.335728	0.530244	0.391899	0.119593	1.70157	1.8968	1.22869
X284	LNIGSSSSPDI	-0.964771	-0.578869	-0.586702	1.5576	0.20859	1.88861	1.4221	-0.582022	1.55608	-0.588597	-0.564562	-0.421482	-0.55527	-0.584352	1.10824	-0.792819	-0.582541	-0.939243
X285	LPQFTDADF	-0.933434	-0.914284	-0.879876	-0.827374	-0.833337	-0.924436	-0.992647	-0.0156067	-0.54524	2.88505	0.147382	0.382275	0.376052	0.817427	0.37465	0.375693	0.377639	1.13007
X286	LPSFSPSPQ	-0.373529	-0.720562	-0.597089	-0.590268	-0.623477	-0.530062	-0.548005	-1.10576	-0.764787	-0.374257	-0.370156	2.15062	-0.373982	1.61601	1.85217	-0.377677	1.12435	0.606468
X287	NGDDVKSACCDTCLCTR	-0.416145	-0.615986	-0.54289	-0.485472	0.0396953	-0.880653	-0.766182	-0.442617	-0.635351	0.0535038	3.44888	0.0515305	-0.154192	-0.06186	-0.21237	0.171984	1.39567	0.0524574
X288	LSGTQNQPSFLSGFSK	-0.779026	-0.963322	-0.668338	-0.797749	-0.214802	-0.562163	-0.819259	-0.446372	-0.506117	0.801579	1.93885	1.93639	-0.213281	2.1263	-0.176432	-0.204129	-0.240032	-0.212092
X289	LSPGDVFVIP	2.61067	2.51342	-0.463706	-0.458227	-0.491967	-0.489739	-0.742839	0.505513	-0.458754	0.126507	0.175913	-0.0570113	0.128498	-0.513912	-0.487182	-0.475439	-0.973138	-0.448605
X290	LSPGDVFVIPAGHPV	-0.838817	-1.04678	-1.01549	-0.90493	-0.966687	-0.972764	-1.17067	1.20042	-0.827613	1.43943	-0.829116	1.01754	0.879855	0.888943	1.10897	0.680705	0.690688	0.666315
X291	LSPGDVFVIPAGHPVA	-0.883555	-0.885898	-0.979055	-0.883318	-1.28293	-0.902915	-0.890571	2.11557	1.4802	1.39418	-0.882678	0.477082	0.250768	0.425198	0.52577	0.29648	0.211353	0.414311
X292	LSPGDVFVVPAGHPV	-0.797701	-0.92537	-0.84695	-0.794237	-0.909258	-0.830469	-0.792744	-0.791817	-0.898539	1.58546	-0.791564	0.924895	1.52175	1.06783	1.24011	0.700607	0.988771	0.349233
X293	LSPGDVFVVPAGHPVA	-1.1229	-1.21734	-1.12825	-1.1337	-1.12302	-1.12355	-1.13959	0.876646	-0.23899	0.695302	-0.0208379	0.927243	1.08034	1.28434	0.793366	0.985769	0.828481	0.776688
X294	LSPGDVFVVPAGHPVAI	-0.899908	-1.06035	-0.934132	-0.917205	-0.984967	-0.924423	-1.10465	0.683894	-0.897891	1.13873	-0.892823	1.18951	0.939681	1.2242	1.21192	0.785922	0.810152	0.632341
X295	LSPGDVLVIPA	-0.922177	-0.961797	-0.919335	-0.92056	0.173177	-0.923166	-1.26756	1.58507	-0.597572	0.896351	1.09801	1.02938	1.61493	0.887597	0.779389	-0.147732	-0.485152	-0.918859
X296	LSPGDVLVIPAGHPV	-0.915124	-0.958913	-1.03065	-0.918556	-0.919207	-0.908833	-1.01179	-0.909774	-0.90727	1.4351	1.24662	1.18887	0.661933	1.08604	0.745753	0.259339	0.91566	0.940801
X297	LSPGDVLVIPAGHPVA	-0.962681	-1.24734	-1.19916	-1.19899	-1.1889	-1.19331	-1.19584	1.42633	0.314208	0.796634	1.13197	0.746784	0.619022	0.940491	0.906948	0.583467	0.556834	0.163538
X298	LSPGDVLVIPAGHPVAI	-1.00646	-1.14134	-1.09904	-1.01102	-1.00634	-1.03355	-1.12588	0.0713362	-1.00621	1.12423	1.02987	0.996833	0.92441	1.10319	1.09599	0.696849	0.851085	0.53605
X299	LSPGDVLVIPAGHPVAIN	-0.692368	-0.722417	-0.70236	-0.602551	-0.443368	-0.677391	-0.513596	-0.137698	-0.506703	1.53204	3.32294	-0.0167316	-0.121267	0.0880081	0.446015	-0.152311	-0.44286	0.342619
X300	LSPGDVVIIPA	-0.812963	-0.961553	-0.989802	-0.805688	-0.210251	-0.822359	-0.982494	-0.30691	-0.804457	1.55561	2.59361	0.434809	1.07932	0.194238	0.664724	-0.146858	-0.230087	0.551106
X301	LSPGDVVIIPAGHPV	-0.733846	-0.988012	-1.03227	-1.03429	-0.649887	-0.774229	-1.15493	0.152254	-1.01516	0.596115	0.847617	1.11819	1.24925	-1.03533	1.22973	1.03477	1.05773	1.13231
X302	LSPGDVVIIPAGHPVAI	-0.624809	-1.04545	-0.925217	-0.97198	-0.342761	-0.662268	-0.77382	-0.270021	0.436886	0.473343	-0.258782	0.491938	0.0403001	3.35465	0.493535	0.14217	0.492506	-0.0502275
X303	LSPGDVVIIPAGHPVS	0.332691	-0.66436	-0.830764	-0.643237	0.811991	0.0619374	-0.635836	-0.629741	-0.855685	0.946812	2.31146	-0.619608	1.44065	-0.630166	1.63379	-0.658998	-0.61942	-0.751515
X304	LSPGDVVIIPAGHPVSI	-1.00696	-1.07576	-1.13027	-1.00037	-1.01078	-1.04156	-1.11505	0.0542919	-0.999058	0.849412	1.54821	0.973121	0.838859	0.672927	0.93431	0.775826	0.892907	0.839953
X305	LSPGDVVIIPAGHPVSIS	-0.8377	-0.972896	-0.775246	-0.887846	-0.781935	-1.16797	-0.799329	-0.336118	-0.784479	0.846567	1.77227	0.994829	-0.773045	1.06058	-0.0409364	1.17496	1.11209	1.19619
X306	LSPGDVVIIPAGHPVSISA	-0.858338	-0.978185	-1.01007	-0.794698	0.108153	-1.04636	-0.98919	0.0998322	-0.4737	0.125175	2.70262	0.110626	0.108924	1.6604	0.101042	-0.128518	0.177861	1.08442
X307	LSPGDVVIIPAGHPVSISAS	-0.64969	-0.748787	-0.93402	-0.109941	-0.138651	-0.960706	-0.968283	-0.839162	-0.914183	0.00435968	1.68274	0.453589	-0.114632	0.352067	-0.10514	-0.108092	1.80752	2.29101
X308	LSPGDVVIIPAGHPVSISASSNL	-0.6825	-0.911745	-0.678678	-0.781713	-0.677051	-0.864217	-0.728221	-0.723288	-0.736295	-0.673793	-0.418236	0.812699	-0.115179	1.76155	1.41003	1.11289	1.3725	1.52126
X309	LSPGDVVIIPAGHPVSISASSNLN	-0.997846	-0.64726	-0.286284	-0.862802	-0.283434	-0.831525	-0.455925	-0.382427	-0.782326	-0.277134	-0.328572	1.18412	-0.428887	0.746706	0.321527	2.33462	-0.272954	2.2504
X310	LTDTGSSNNQLDQMPR	1.0051	0.788186	0.813809	-1.73044	-0.0316644	0.170433	0.358286	0.861753	0.534973	-1.70459	0.850417	0.0929453	-1.78825	0.284385	-1.7408	0.559876	0.472652	0.202921
X311	LTETWNPNHP	-0.676024	-0.683301	-0.387588	-0.668935	-0.550189	-0.838656	-0.503114	-0.388823	-0.486942	-0.00557344	-0.147056	-0.158503	-0.387032	-0.0286507	-0.364311	2.37944	2.30298	1.59228
X312	LTETWNPNHPE	0.660484	0.601034	0.616181	0.357848	-1.6456	0.280251	0.0182798	0.423373	0.733306	-0.286094	-3.15484	-0.241268	0.173228	0.00498998	-0.577227	0.912931	0.929303	0.193822
X313	LTETWNPNHPEL	-0.607463	1.19263	1.39464	-0.585322	1.28582	1.52877	1.75328	-0.253592	0.284497	-0.605454	-0.616012	-0.585536	0.117678	-0.652042	-0.399107	-0.587817	-1.58502	-1.07994
X314	LTFPGSAQE	1.28133	1.04759	1.10425	-1.3271	0.490022	-1.31818	-1.29105	-1.29719	-1.40858	0.466926	0.621892	0.439606	0.343272	0.400428	0.24552	0.937059	-1.2854	0.549598
X315	LTGSDDNVISQ	2.47023	2.51065	-0.33058	-0.316344	-0.349365	1.30892	-0.320336	-0.353495	-0.349745	-0.567197	-0.326993	-0.392138	-0.617541	-0.656016	-0.364479	-0.339655	-0.663848	-0.342067
X316	LVDMVQLLVMNGASVLDMH	-0.855748	-1.02086	-0.864091	-0.945996	-0.854519	-0.865778	-0.856956	-0.853274	-0.960244	1.06423	-0.361127	1.37587	0.91284	1.28678	1.53368	0.839442	0.73901	0.686748
X317	LVNEGKGNLELVGF	-0.824966	-0.94015	-0.825259	-0.899849	-0.829251	-0.828096	-0.8449	-0.826667	-0.963638	0.963355	-0.82502	1.37792	1.06585	1.28629	1.1286	1.02209	0.689653	1.07404
X318	LVNEGKGNLELVGFKNEQQE	-0.756035	-0.744901	-0.439019	-1.1751	-0.647241	-0.383404	-0.783652	-0.305484	-0.312388	1.80066	-0.280442	1.93239	-0.295124	2.04897	-0.263831	1.16658	-0.279445	-0.282539
X319	LVNEGKGNLELVGFKNEQQEREDN	-0.406148	-0.608765	-0.848037	-0.839939	-0.100188	-0.180884	-0.0828484	-0.0710882	2.47358	-0.0751563	-0.449064	-0.0773842	-0.0702314	2.7643	-0.0850466	-0.318549	-0.0802057	-0.944346
X320	LVNPDDEEDL	0.752252	0.648436	0.704794	0.7443	0.405006	0.823363	0.798711	-1.93558	-1.44262	0.492142	-1.44545	0.585102	-1.44396	0.533246	0.516895	-1.44591	0.392093	0.317178
X321	LVNPDDEEDLRVV	-0.444265	-0.750357	-1.0676	-0.201622	-0.598934	-0.177063	-1.28058	0.0383556	-1.09094	0.414957	-0.214058	1.16954	3.14195	0.394745	0.408212	-0.0614278	0.196522	0.122563
X322	LVNPDDEEDLRVVD	1.14841	1.11151	0.595832	1.02033	3.0164	-0.483011	-0.12476	-0.483495	-0.819838	-0.541267	-0.485113	-0.497473	-0.521144	-0.686628	-0.531185	-0.587268	-0.637581	-0.493725
X323	LVNPDDEEDLRVVDF	-0.662422	-0.673041	-0.553473	-0.636087	1.83899	-0.85342	-0.583612	-0.553147	-0.817712	0.324131	2.86196	0.216359	-0.55254	0.125762	-0.51739	0.512376	-0.304456	0.827723
X324	NAAWDPSNKE	-0.531723	1.41827	-0.530686	1.63688	-0.537238	1.6229	1.58253	-0.53225	1.53262	-0.628481	-0.531478	-0.710789	-0.54025	-0.811946	-0.532078	-0.537834	-0.537269	-0.831187
X325	NALEPDHRVESEA	1.50796	1.29444	1.51229	1.52143	-0.628241	1.07942	1.28109	-0.627965	-0.62837	-0.704191	-0.658859	-0.630138	-0.642916	-0.774845	-0.732371	-0.757896	-0.628792	-0.78204
X326	NASSDLNLIGF	-0.808895	-0.863274	-0.835574	-0.868106	2.43309	-0.798792	-0.833008	-0.794905	-0.831779	0.613795	1.37455	1.04464	0.554661	0.90002	0.754472	-0.467471	-0.556657	-0.0167727
X327	NASSDLNLIGFGINAK	-0.645303	-0.940918	-0.642349	-0.923293	-1.06612	-0.646865	-0.660456	-0.60132	-0.617252	2.34493	-0.610159	0.878665	0.52908	0.984862	0.971305	1.09885	1.14101	-0.594662
X328	NASSDLNLIGFGINAKNNQ	0.0173619	-0.428736	-1.09204	0.0247059	-0.690377	-0.577641	-0.690519	-0.923154	-0.475557	0.0169642	-0.22172	0.0428412	-0.0179783	0.0135404	0.0333682	0.04169	3.1929	1.73435
X329	NDDEGSEPRVPG	-0.307863	2.35582	2.21065	1.7943	-0.326743	-0.305469	-0.324098	0.126815	-0.510985	-0.677712	-0.643653	-0.575835	-0.521447	-0.50981	-0.755384	-0.306481	-0.407602	-0.314499
X330	NDDEGSEPRVPGQRE	0.306141	3.09408	1.90937	0.309124	-0.231653	0.222408	0.299518	-0.424812	-0.372292	-0.476129	-0.494504	-0.588167	-0.547866	-0.597935	-0.756984	-0.337187	-0.824033	-0.489077
X331	NEDVIVKVSREQIEELSK	-0.993298	-1.15723	-0.672553	-1.26144	0.000831907	-0.8942	-0.620466	-0.104931	-0.02842	-0.00397264	-0.194187	0.00205798	0.00181738	2.34119	0.773052	2.22655	0.59998	-0.0147731
X332	NEDVIVKVSREQIEELSKNA	-0.486935	-0.811758	-0.73245	-0.771282	-0.715327	-0.870152	-0.797384	-0.827561	-0.716468	1.14987	-0.714867	1.20246	-0.71437	1.28796	1.26113	0.15745	1.51703	1.58265
X333	NEDVIVKVSREQIEELSKNAK	-0.45163	-0.714091	-1.07114	-0.272623	-0.615012	-0.331148	-1.30061	0.335146	-0.976076	0.590378	-0.259983	0.587172	3.22295	0.47418	0.591243	-0.116563	0.288545	0.0192579
X334	NEGGLLLPH	2.41218	2.47928	-0.498703	-0.597403	-0.690025	-0.504354	-1.05507	-0.515093	-0.765904	0.274762	-0.524061	0.114116	0.353355	-0.493328	-0.495647	0.45933	-0.498362	0.544924
X335	NEGKGDFELVGQ	-0.642228	-0.931828	-0.660899	-0.849153	-0.769141	-0.442925	-0.845363	-0.393794	-0.397134	2.45444	-0.39544	1.68914	0.702495	0.921672	1.44162	-0.150842	-0.392106	-0.338517
X336	NEGKGDFELVGQRNENQQEQ	-0.662648	-0.916951	-0.531263	-0.740207	-0.266049	-0.358416	-0.606044	-0.759443	-0.625709	-0.110099	-0.110515	2.43812	-0.0922005	2.4193	1.2226	-0.102694	-0.0975623	-0.100223
X337	NFLAGEEDNV	1.46068	1.2496	1.12077	1.07732	-0.916718	1.02383	0.924279	-0.92623	1.25412	-0.467296	-1.18228	-0.145144	-0.53975	-0.153293	-0.595238	-1.15769	-0.930705	-1.09624
X338	NFLAGEEDNVI	-0.740992	-1.06445	-0.515942	-0.905046	-0.530015	-0.549643	-0.532182	-0.861644	-0.833902	-0.510282	-0.508916	1.70368	1.31696	1.51151	1.39879	1.08892	1.04216	-0.509012
X339	NFLAGEEDNVISQ	0.916094	0.568751	0.640347	0.844084	1.49495	0.981533	1.0625	-1.18859	-1.13708	-0.484502	1.55489	-0.892613	-0.883505	-0.59582	0.146908	-0.942596	-0.962986	-1.12237
X340	NFLAGEEDNVISQI	-0.663086	-0.764187	-0.74771	-0.69567	1.86715	-0.662037	-0.664138	0.230714	-0.553369	0.565331	2.88198	0.394979	-0.167288	0.374306	0.407651	-0.541316	-0.659907	-0.603396
X341	NFLAGEEDNVISQIQRP	-0.648811	-0.797798	-0.689916	-0.605467	0.0631719	-0.811854	-0.685464	-0.228475	-0.609853	0.586017	3.61047	0.258628	0.105485	0.114192	0.204359	-0.060379	0.162479	0.0332119
X342	NFLAGEEDNVISQIQRPV	-0.507835	-0.712874	-1.13694	-1.16868	-1.22212	-1.12932	-1.21972	0.693477	-0.147771	1.05904	-1.12093	1.11938	0.984543	0.988193	1.07906	0.893672	0.970288	0.578529
X343	NFLAGEEDNVISQIQRPVK	-0.678626	-0.972133	-0.909455	-0.754684	-0.671382	-0.95139	-0.854331	-0.376291	-0.675967	1.00924	2.48117	0.806862	-0.166546	1.22116	1.0228	-0.669513	0.682638	0.456448
X344	NFLAGEEDNVISQIQRPVKE	-0.83634	-1.0855	-0.987315	-0.992451	-0.833352	-1.33657	-1.01953	1.04968	-0.569108	1.21712	1.00654	0.84009	-0.830459	1.15887	0.290203	0.843335	1.12882	0.955969
X345	NFLAGEEDNVISQIQRPVKEL	-0.961991	-1.13039	-1.06917	-0.999956	-0.959219	-1.00601	-1.17251	0.61319	-0.958995	1.2434	-0.0829846	1.12468	1.03178	1.23087	1.19629	0.542464	0.731507	0.627037
X346	NFLTGSDDNVISQ	0.991093	-0.879494	0.398819	0.357921	2.77916	0.0163208	0.180958	-0.922711	-0.945869	0.213718	1.4943	-0.0284277	-0.924566	-0.0906884	-0.881472	-0.873166	-0.878822	-0.00707106
X347	NFLTGSDDNVISQIENPV	-0.634155	-0.877844	-0.848359	-0.703816	-0.356769	-0.547803	-0.855979	-0.344062	-0.637547	1.15429	2.88118	0.876424	1.15189	-0.124337	0.90699	-0.347633	-0.345608	-0.346861
X348	NFLTGSDDNVISQIENPVK	-0.660849	-0.926651	-0.806383	-0.66135	0.0543571	-0.824009	-0.822628	-0.0260772	-0.524627	0.0508477	3.47866	0.472621	0.605904	0.105185	0.510617	0.0408198	0.0460506	-0.112487
X349	NFLTGSDDNVISQIENPVKEL	-0.809608	-1.0224	-0.957685	-0.910116	-0.814127	-0.812628	-0.915675	-0.809299	-0.971261	0.885963	2.0816	0.945526	1.10849	0.539638	1.29546	0.48586	0.581176	0.0990917
X350	NGLHLPSFSPSP	1.59397	1.28719	-1.05518	-1.02221	1.26076	1.04951	-1.0351	-1.04702	0.215447	-1.06596	-1.03703	-0.689669	0.371778	-0.539648	0.0373715	1.04116	1.13445	-0.499823
X351	NGLHLPSFSPSPQ	1.63211	1.11166	0.46964	0.867228	-1.7047	0.801399	0.623357	0.67739	0.729501	-1.68988	0.911187	-0.859916	-0.427222	-0.830748	-0.966862	-0.41763	-0.0370013	-0.889519
X352	NIGSSSSPDIYNP	-0.350332	1.80683	2.73913	1.62749	0.289496	-0.351481	-0.106984	-0.368366	-0.883708	-0.553264	-0.4047	-0.533699	-0.43904	-0.388904	-0.81729	-0.360837	-0.55182	-0.352517
X353	NILEAAFNTEY	-0.874119	-0.84977	-0.966998	-0.714586	-0.425786	-0.816173	-1.08837	0.086329	-0.558086	2.22613	0.0831713	0.118025	2.13686	1.46412	0.120067	-0.0530306	0.116656	-0.00444248
X354	NILEAAFNTEYEEIEK	-0.650984	-0.743523	-0.665263	-0.965208	0.663416	-1.16969	-1.04783	2.3592	0.26651	-0.291419	1.82772	1.19132	-0.237335	0.135497	0.705626	-0.344991	-0.382097	-0.650955
X355	NILEAAFNTEYEEIEKV	0.0637461	-0.326128	-0.493468	-1.33586	-1.33026	-1.3337	-1.47769	0.362878	-1.34327	0.959081	-0.312404	0.926642	0.92602	0.991963	1.02284	0.915528	0.883896	0.900175
X356	NILEAAFNTEYEEIEKVL	-0.896675	-0.986906	-0.942144	-0.900215	-0.89695	-0.899487	-0.94281	-0.899281	-1.05684	0.89947	0.188337	1.22103	1.18179	1.22423	1.39555	0.476465	0.854367	0.980068
X357	NILEAAFNTEYEEIEKVLL	-0.760122	-0.814441	-0.489595	-0.534934	-0.572693	-0.451438	-0.765667	-0.664872	-1.17331	-0.436833	-0.426002	2.13955	1.91129	-0.430195	1.45078	0.557674	0.617476	0.843328
X358	NILEAAFNTEYEEIEKVLLEEQEQ	-0.780981	-0.887777	-0.781759	-0.829827	-0.798737	-0.7975	-0.913529	-0.787439	-1.02645	0.788872	-0.78327	1.70427	1.48482	0.706543	1.21514	1.08741	0.565235	0.834986
X359	NILEAAFNTEYEEIEKVLLEEQEQK	-0.68543	-0.981487	-0.782993	-0.810874	-0.511549	-0.521508	-0.718664	-0.589662	-0.866675	-0.512003	0.935552	1.97591	0.981744	1.51559	1.88907	-0.507852	0.103253	0.0875701
X360	NLERGDTIKLPAGT	1.53989	1.51993	1.46842	1.34741	1.12589	1.12062	-0.535757	-0.536967	-0.554695	-0.910427	-0.53983	-0.539392	-0.842425	-0.815633	-1.01287	-0.543863	-0.641691	-0.648602
X361	NLERGDTIKLPAGTI	-1.87674	-1.17159	0.832468	0.951479	0.194172	-1.17195	0.907267	-1.17222	-1.18373	0.574282	-1.16996	0.372531	1.37208	0.539143	-0.00846488	0.726681	0.900563	0.383992
X362	NLERGDTIKLPAGTIA	-0.750372	-0.601342	-0.50426	-0.663293	-0.487042	-0.741054	-0.82289	-0.42987	-0.638228	0.406048	-0.421254	-0.408586	1.3283	-0.413666	-0.408395	2.28356	1.36679	1.90554
X363	NLERGDTIKLPAGTIAYL	-0.931466	-0.820685	-0.755204	-0.584926	-0.566036	-1.01074	-0.927937	-0.570204	-0.684929	1.10542	1.74914	0.938066	-0.368155	0.805795	-0.564982	0.385729	0.622193	2.17892
X364	NLLGFGINAENNER	-0.417589	-0.908991	-0.809666	-0.413007	3.19107	-0.493762	-0.432821	-0.463892	-0.901539	-0.375794	-0.442004	0.309068	1.24911	0.30465	0.926844	-0.411592	0.499678	-0.409756
X365	NLLGFGINAENNERNFL	-0.847144	-0.878803	-0.155475	-1.03637	-0.350963	-0.726873	-0.55596	-0.791046	-0.579081	0.0868501	-0.418085	2.4208	-0.132807	-0.126522	1.32582	1.92459	0.967473	-0.126416
X366	NNPGQLESFLLSGTQNQPS	-1.03422	-0.795446	-0.665521	-0.927501	-0.672246	-0.975253	-0.961513	0.676454	-0.663886	1.44984	-0.666326	-0.0769766	1.13443	0.610955	1.15326	1.67913	-0.666274	1.4011
X367	NNPGQLESFLLSGTQNQPSFL	-0.547717	-0.812706	-0.747848	-0.771358	-0.600163	-0.610825	-0.686148	-0.359454	-0.718198	0.977645	-0.351735	-0.351281	1.74159	-0.101129	0.159251	2.10629	2.0467	-0.372913
X368	NRPGEPQSFLLSGNQNQPS	-0.524444	-0.928517	-0.747649	-0.865093	-0.00907272	-0.747933	-0.589848	-0.328953	-0.460431	0.0729831	-0.242914	0.0882303	0.0905097	2.36005	2.76643	-0.101653	0.0897279	0.0785766
X369	NRPGQLQSFLLSGTQNQPS	-0.0698322	-0.695178	-0.906978	-0.357516	-0.503807	-0.518863	-0.738329	-0.852394	-0.927838	-0.0658666	-0.366174	0.02445	1.81923	-0.0542656	2.13482	-0.0712959	2.21088	-0.0610361
X370	NSFNLERGDTIKLPAGTI	-0.520288	-0.864898	-0.670577	-0.720761	0.517583	-0.707484	-0.556039	-0.442718	-0.889836	0.532944	-0.388704	0.436995	0.534107	0.523464	3.40633	-0.240932	-0.196971	0.247788
X371	NTDYEEIEK	-1.1155	0.654613	0.83697	0.798393	0.590595	1.02186	0.797654	-1.1232	0.957338	0.995201	-1.08688	-1.01522	0.966174	-1.03806	1.01558	-1.11474	-1.10819	-1.0326
X372	NTDYEEIEKV	-0.552029	0.00255406	-0.555617	-0.577985	0.805428	-1.44149	-1.41458	2.79504	-0.562243	-0.563809	-0.560411	0.922553	0.897003	0.389011	-0.571065	0.500627	0.0672657	0.41975
X373	NTEYEEIEKV	-0.554602	-0.0341057	-0.566881	1.90479	0.431594	1.75886	2.37941	-0.895651	-0.57846	-0.558275	-0.602301	0.265853	-0.0623142	-0.15295	-0.592066	-0.638168	-0.728883	-0.77585
X374	NTEYEEIEKVLLEEQEQK	-0.894349	-0.920495	-0.628555	-0.868263	2.04628	-0.68318	-0.804321	-0.767231	-0.625572	0.932477	-0.625355	1.70054	-0.221564	1.33052	0.38283	0.0594117	-0.609054	1.19588
X375	NTEYEEIEKVLLEEQEQKS	-0.836373	-0.886452	-0.922269	-0.655429	-0.61715	-0.836028	-0.958273	-0.64967	-0.349776	1.38732	0.641493	1.25353	-0.348146	1.88263	-0.349195	-0.347542	0.786366	1.80496
X376	NTNYEEIEK	-0.926853	-0.348934	-0.87553	0.725284	-0.616963	3.33309	0.720092	-0.940155	-0.491772	-0.360328	-0.813631	0.11701	0.114454	-0.169414	0.019935	0.831785	-0.190707	-0.127368
X377	PHMPSSSSN	-0.19107	-0.466728	-0.318903	-0.166964	3.86824	-0.13877	-0.1448	-0.376353	-0.724322	-0.14981	-0.138923	0.404983	-0.141088	-0.136533	0.174445	-0.450224	-0.626276	-0.276901
X378	PSFSPSPQL	-0.522068	-0.462557	-0.476599	-0.475123	2.63139	-0.461821	-0.216284	1.391	1.70726	-0.556694	1.2461	-0.477682	-0.500178	-0.465179	-0.468867	-0.463908	-0.796598	-0.632192
X379	QEEETSTQVQR	-0.281974	-0.349092	-0.355051	-0.338038	2.7942	-0.414474	-0.284044	-0.321549	-0.478413	-0.288569	2.69272	-0.280359	-0.301402	-0.411372	-0.284922	-0.283461	-0.394168	-0.420029
X380	QEEKEEEEEEK	-0.615836	-0.666752	-0.413806	-0.614276	-0.58302	-0.709885	-0.758161	-0.59925	-0.85192	-0.398759	-0.412616	0.495264	1.15816	-0.394935	-0.334336	2.03435	2.03649	1.62929
X381	QTLYENENGHI	-0.857977	-0.489711	-0.517999	-0.555775	-0.138154	-0.366727	0.142164	0.484086	3.68395	0.0224466	-0.843533	-0.0709612	-0.199667	0.0652199	0.412661	0.217631	-0.475863	-0.511792
X382	QTLYENENGHIR	-0.306243	-0.700442	-0.726281	-0.536674	-0.462898	-0.745416	-0.872467	-0.314661	-0.473737	1.23139	2.95833	0.0720694	-0.286044	0.28165	-0.285828	-0.295393	1.74929	-0.286647
X383	QVEEQTEEKD	-0.482307	1.53925	1.62966	-0.482778	-0.484094	-0.479733	0.981308	1.81912	1.68357	-0.517411	-0.532866	-0.494502	-0.913118	-0.570214	-0.489798	-0.481859	-0.9728	-0.751422
X384	QWRPSHGKEEDEEEKEQ	-1.09563	-0.710629	-0.58607	-0.812489	0.0926801	-1.00568	-0.806045	-0.212217	-0.832872	0.235391	0.100066	0.23468	0.18102	0.216876	0.0204421	1.93415	0.238466	2.80786
X385	REESDEEEEQEEE	0.0184589	2.59518	2.61667	0.493524	-0.206446	-0.110299	0.0284098	-0.108994	-0.270543	-0.558245	-0.651397	-0.608652	-0.564157	-0.585974	-0.792092	-0.256588	-0.647067	-0.391791
X386	SACCDTCLCTR	-0.591027	-0.702585	-0.26191	-0.824507	-0.50584	-0.822106	-0.598959	-0.632898	-0.665181	-0.268336	-0.276306	1.12341	-0.263851	-0.268961	-0.261036	2.34654	1.97721	1.49634
X387	RPSHGKEEDEEEKEQ	-0.531191	-0.690531	-0.742193	-0.655637	-0.851211	-0.893958	-0.586502	-0.474509	-0.541974	0.636542	-0.473666	-0.282902	0.0704409	-0.471339	0.784594	1.75323	2.44612	1.50468
X388	RQQSQEENVIVK	-0.581818	-0.468378	-0.648862	-0.374182	3.45766	-0.286752	-0.400089	-0.279534	-0.393687	0.884124	-0.263484	-0.264205	1.32107	-0.266357	-0.159515	-0.275522	-0.264246	-0.736216
X389	RSDQENPFIFKSNRFQTLY	-0.782047	-0.949303	-0.847895	-0.775011	-0.770008	-0.775922	-0.882988	-0.775057	-0.833671	1.2597	-0.769681	0.080876	1.22431	1.74722	0.578607	0.739057	1.45795	1.07386
X390	RSDQENPFIFKSNRFQTLYE	-0.588542	-0.797245	-0.746826	-0.522725	-0.523397	-0.949398	-0.811123	-0.521212	-0.784926	-0.5211	0.150528	-0.00581768	0.0479339	0.92192	0.0116976	1.19042	2.25585	2.19396
X391	SATTGAEFAAHEVHSWSF	-0.596351	-0.849162	-0.720388	-0.821473	-0.5658	-0.738123	-0.504996	-0.526489	-0.667001	0.159875	0.158935	-0.0156968	0.174366	0.136146	0.160636	2.49014	2.5558	0.169586
X392	SDLFENLQN	0.145343	-0.120737	0.195085	-0.723966	2.66589	-0.382917	-0.803556	-0.907333	-0.886958	0.93803	-0.841855	0.819186	-0.844158	-0.846226	-0.865131	0.72918	0.40264	1.32748
X393	SDLFENLQNY	-0.41915	-0.789795	-0.532947	-0.505775	3.03365	-0.393582	-0.363044	-0.545999	-0.93031	-0.375986	-0.356337	1.32602	-0.362529	0.978466	1.13811	-0.37465	-0.661681	0.135537
X394	SDQDNPFIFES	-0.93439	-0.705157	-0.571422	-0.645503	-0.49536	-0.497068	-0.636828	-0.489558	0.705163	1.32805	-0.49355	2.06372	-0.494979	2.11708	-0.490537	-0.502067	-0.491924	1.23432
X395	SDQDNPFIFESK	0.205616	-0.0154767	0.0889818	0.0310552	1.10053	0.472941	0.146496	-1.09893	-1.21371	-1.10987	-0.711715	1.31404	1.41719	1.36108	1.33933	-1.13255	-1.1006	-1.09441
X396	SDQENPFIF	-0.563914	-0.762366	-0.646799	-0.612186	3.32963	-0.454699	-0.517326	-0.466106	-0.763803	0.456727	1.02283	0.781938	0.259321	-0.109666	0.518493	-0.456154	-0.570237	-0.445687
X397	SDQENPFIFK	-0.795713	-0.947722	-0.718147	-0.775432	0.0538936	-0.878679	-0.804693	-0.0930873	-0.640632	0.0494072	3.15981	0.918997	0.0549973	1.29286	0.036173	0.0387306	0.0320738	0.0171596
X398	SFLLSGTQNQPSFL	-0.799733	-0.926999	-0.526887	-0.933423	-0.534844	-0.475774	-0.699139	-0.694623	-0.574889	1.42852	-0.109827	2.5891	-0.10488	1.46504	1.2574	-0.134173	-0.104055	-0.120814
X399	SFNTGYEEIE	2.00996	1.77567	1.24957	1.26645	-0.440151	1.38159	-0.514704	-0.515948	-0.919073	-0.522277	-0.622775	-0.519546	-0.613647	-0.650681	-0.75197	-0.529557	-0.5232	-0.559711
X400	SFNTGYEEIEK	1.16973	0.888169	1.18609	0.980981	-1.25395	-1.50767	0.998345	0.91133	1.0007	-1.50256	-0.83002	-1.54017	-0.474605	-0.141133	-0.239063	0.183492	-0.170214	0.34056
X401	SFNTGYEEIEKV	0.421734	0.365696	0.521726	0.893054	-0.827674	0.762172	0.983187	-1.65364	-1.67231	0.814474	-1.6496	0.575064	0.799184	-1.68459	0.717267	0.267395	0.113177	0.253677
X402	SGFSKNILEAAFNTEYEEIEKV	-0.639463	-0.893131	-0.584888	-0.903246	-0.582678	-0.840854	-0.677572	-0.975214	-0.745563	0.100811	-0.584038	1.80224	-0.58254	1.18273	1.44526	0.831744	1.3623	1.2841
X403	SILEAAFNTDYEEIEK	-0.688985	-0.690537	-0.720699	-0.752373	1.9798	-0.933406	-0.695886	1.24271	0.581686	-0.270578	2.56748	-0.160046	-0.633488	-0.252209	0.134455	0.272406	-0.68601	-0.294312
X404	SILEAAFNTDYEEIEKV	-0.96253	-1.02348	-0.985398	-0.964044	-0.967072	-1.0791	-1.17096	1.33048	-0.398492	0.95958	-0.963057	0.63408	0.782322	0.607065	1.00693	1.09122	0.851052	1.2514
X405	SILEAAFNTDYEEIEKVL	-0.312743	-0.936218	-0.936231	-1.04118	-0.949362	-0.937047	-1.17609	-0.939255	-1.20734	0.900674	0.207409	1.00364	1.06011	1.03493	1.14673	1.13378	0.910626	1.03758
X406	SILEAAFNTDYEEIEKVLL	-0.840852	-1.04268	-0.843788	-0.915255	-0.841392	-0.844347	-0.930584	-0.84647	-1.06623	0.270088	0.299939	1.62784	1.20532	1.38076	1.4266	0.530566	0.67052	0.759963
X407	SILEAAFNTDYEEIEKVLLEDQEQE	-0.193201	-0.868835	-1.0803	-0.36651	-0.327159	-0.776997	-0.811345	-0.689233	-0.525804	-0.198945	-0.392488	-0.192878	-0.198371	1.6702	1.87119	-0.19656	2.27736	0.999881
X408	SKIFENLQN	-0.825685	-0.915566	1.20231	-0.848582	-0.841506	-0.837751	1.15827	-0.835943	-0.835587	-0.828268	-1.02475	0.892943	0.758538	1.03759	-0.827576	1.18598	1.0455	1.34009
X409	SKIFENLQNY	-0.895514	-0.796122	-0.689151	-0.889175	-0.988798	-0.825966	-0.649883	0.213502	-0.525259	3.06612	-0.00466922	0.216009	0.205502	0.210625	0.213707	1.4185	0.507098	0.213471
X410	SKIFENLQNYRLL	-0.46863	-0.704172	-0.67957	-0.54948	-0.173097	-0.907044	-0.925528	-0.292233	-0.579937	0.789842	3.28684	0.162968	0.221345	-0.165126	-0.183735	-0.169797	1.34059	-0.00323667
X411	SKIFENLQNYRLLEYK	-0.644182	-0.750049	-0.566287	-0.778467	-0.377007	-0.37503	-0.787615	-0.51218	-0.364006	1.89045	1.18305	2.01848	-0.367419	1.99838	-0.370947	-0.369855	-0.46372	-0.363596
X412	SKPHTIFLPQFTDADF	-0.736742	-0.708555	-0.617601	-0.575865	-0.497662	-0.863442	-1.10445	-0.491515	-0.961195	2.34762	0.0172213	0.375327	1.99585	0.394783	1.2328	0.533993	-0.493494	0.152924
X413	SKPHTIFLPQFTDADFILVVLSGK	-0.677853	-0.653427	-0.665169	-0.598543	-0.51101	-0.460452	-0.930072	-0.455637	-0.638013	1.91444	0.673949	1.50276	2.19926	1.13971	-0.453364	-0.459043	-0.451637	-0.475907
X414	SKPHTIFLPQQTDADFILVVLSGK	-0.897578	-0.953516	-0.593346	-0.233401	-0.146363	-0.000705553	-0.99742	-0.67144	-0.993655	0.0923667	-0.590681	2.57235	2.07909	1.05204	0.0780317	0.0768735	0.0525758	0.0747828
X415	SLNTKYDTIEKVLL	-0.807904	-0.983499	-0.964447	-0.925607	-0.141096	-0.951934	-0.958584	-0.224294	-0.519259	0.838538	-0.0783028	0.070698	0.27481	2.59851	1.55574	-0.059985	0.0693797	1.20724
X416	SLNTKYDTIEKVLLEEQENEPH	-0.2013	-0.937537	-0.940898	-0.842567	-0.667005	-0.75254	-0.814624	-0.272925	-0.204845	0.0638002	-0.202305	0.244127	-0.199126	2.784	-0.200816	0.698437	2.02281	0.423309
X417	SLNTKYDTIEKVLLEEQENEPHQ	-0.194738	-0.825002	-0.708552	-0.655526	-0.673388	-0.479554	-0.637849	-1.12567	-0.590817	-0.187927	-0.321711	1.86858	-0.188975	1.63304	1.40542	-0.188929	2.0645	-0.192908
X418	SLPSEFEPF	0.904188	0.811663	0.821146	0.905425	-1.08392	0.986673	0.888992	0.895159	0.951304	-1.08073	-1.07979	0.781769	-1.08163	-1.07868	0.73143	-1.08291	-1.10145	-1.08865
X419	SLTDTGSSNNQLDQM	3.59225	1.01947	0.0447517	-0.0813286	0.0467599	-0.117957	-0.78529	0.0389651	-0.960915	-0.364108	0.00246482	-0.406149	0.044054	-0.678443	-0.564684	-0.00519992	-0.223287	-0.601358
X420	SLTDTGSSNNQLDQMP	-0.362598	-0.357393	-0.586987	-0.713971	-0.346437	-0.592772	-0.441997	2.73406	2.45457	-0.353971	0.623971	0.410435	-0.465818	-0.346385	-0.351159	-0.35326	-0.478596	-0.471695
X421	SNKFLTLFENENGHIR	-0.958294	-0.749767	-0.630161	-0.823493	-0.286071	-0.947582	-0.930635	-0.281955	-1.03117	0.162288	0.0551735	-0.281511	1.73984	0.0124325	0.421122	2.10555	0.591368	1.83287
X422	SNRFQTLYENENGHI	-0.817417	-0.955068	-0.909416	-0.831238	-0.871933	-0.867899	-0.904117	0.295572	0.361901	1.04239	-0.858247	0.946264	1.10391	1.55589	2.00758	-0.820031	-0.0178258	0.539682
X423	SNRFQTLYENENGHIR	-0.68524	-0.960788	-0.773434	-0.882109	-0.723312	-0.619827	-0.847913	-0.211548	-0.460438	2.45047	-0.207126	1.25447	0.333189	1.43225	1.55603	-0.220584	-0.210867	-0.223225
X424	SNRFQTLYENENGHIRLL	-0.836065	-0.939756	-0.510145	-0.904635	-0.603847	-0.601913	-0.756869	-0.796978	-0.769518	0.452317	-0.355163	2.83429	0.456653	0.457907	1.56889	0.446614	0.408655	0.449565
X425	SPGDVLVIPAGHPVAI	-0.701115	-0.846591	-0.738846	-0.663743	0.140415	-0.870965	-0.685916	-0.0357744	-0.454674	0.147186	3.55476	0.14763	-0.050843	0.776819	0.108143	-0.107434	0.13873	0.142224
X426	SRNPIYSNKFGKF	-0.515427	-0.577375	-0.6181	-0.514829	-0.512915	-0.716026	-0.512815	-0.514174	-0.991779	-0.517223	-0.715512	-0.51448	1.69077	-0.521167	1.81166	1.30431	1.43633	1.49876
X427	SRQEEDEDEDEKEE	2.8857	0.824497	0.89225	0.675808	-0.502874	0.300771	-0.503815	-0.501479	-1.3714	-0.541345	-0.743671	-0.517633	-0.501545	-0.704356	-0.758353	0.987744	0.585332	-0.505633
X428	SRSDQDNPFIFES	-0.481234	-0.762278	-0.686639	-0.636631	-0.331992	-0.334947	-0.789169	-0.33464	-0.967883	-0.331077	-0.332925	1.53801	1.86587	1.75039	1.96232	-0.461819	-0.330508	-0.33485
X429	SRSDQDNPFIFESK	-0.816793	-0.925225	-0.997553	-0.754715	-0.774481	-1.18658	-1.0917	1.53103	-0.76918	-0.756099	1.59698	0.219569	1.19757	1.43726	0.567654	0.500986	0.433255	0.588019
X430	SRSDQDNPFIFESKR	-1.10601	-0.694489	-0.473143	-0.850595	-0.156412	-0.990613	-0.699199	-0.00730253	-0.803631	0.192342	-0.0800151	0.207144	0.151359	0.165206	0.0398369	2.40255	0.201887	2.50109
X431	SRSDQENPFIFKSNRFQTLY	-0.182697	-0.806306	-1.04046	-0.827613	-0.607866	-0.717683	-0.95071	-0.248336	-0.123542	1.56505	-0.0787179	-0.0507168	-0.0664064	2.83739	-0.0543952	-0.0704833	1.46977	-0.0462814
X432	SVEIKEGSLLLPN	1.45246	1.32927	0.853394	0.617951	-0.757856	0.429004	0.299579	-0.764252	-0.775869	-0.760752	-1.16608	-0.763648	1.76168	-0.783802	1.37824	-0.794274	-0.771848	-0.783199
X433	SVEIKEGSLLLPNYNS	-0.373182	-1.21305	-1.25416	-1.20329	-0.212981	-1.20343	-1.20424	0.99795	-0.0735526	0.484517	-1.20208	1.03285	0.907184	1.08895	1.49767	0.304765	0.742274	0.883815
X434	SVEINEGGLLLPH	1.15242	0.601926	-0.544994	-0.0323972	-2.25446	0.171839	-1.14544	0.233642	-0.477554	0.434751	-2.23499	0.361935	1.12342	0.58065	0.136395	0.54934	0.382426	0.961094
X435	SVEINEGGLLLPHY	-0.602586	-0.665448	-0.487002	-0.463759	0.124827	-0.762575	-0.470221	-0.274352	-0.68664	0.122353	3.76797	0.113739	-0.173375	0.0921397	0.103638	-0.127074	0.121648	0.266718
X436	SVEINEGGLLLPHYN	-0.600254	-0.801915	-0.651066	-0.660672	0.106129	-0.7309	-0.51067	-0.277499	-0.499965	0.127262	3.6184	0.899055	-0.0243693	0.126207	0.130574	-0.126376	0.0573358	-0.18128
X437	SVEINEGGLLLPHYNS	-0.966518	-1.09913	-0.968084	-0.973906	-0.969687	-0.969794	-1.04001	0.357601	-0.570926	0.607942	-0.967071	1.1022	1.00584	1.12552	1.23195	0.859913	1.16604	1.06812
X438	SVLEASLNTKYDTIEK	-0.575188	-0.841084	-0.560827	-0.735872	2.9923	-0.695161	-0.556452	-0.556701	-0.721127	0.831259	-0.550131	-0.183549	-0.55741	1.32394	1.16856	0.0744914	-0.0971255	0.240072
X439	SVLEASLNTKYDTIEKV	2.82459	0.237254	-0.368574	-0.0753134	-0.0930507	-0.0774124	-1.29737	-0.0750531	-1.53234	-0.072796	-0.170272	-0.0673735	2.057	-0.455115	-0.0520984	-0.126469	-0.152461	-0.503149
X440	SVLEASLNTKYDTIEKVL	-0.626494	-0.872425	-0.795921	-0.726732	-0.884715	-0.715966	-0.63791	-0.375338	-0.602272	2.84551	-0.379278	0.0281932	0.601427	0.623572	1.55288	0.535326	0.805072	-0.374933
X441	SVLEASLNTKYDTIEKVLL	-1.03603	-0.853658	-0.415059	-0.904241	-0.412993	-0.727012	-0.542349	-0.768751	-0.759813	0.0825028	-0.411952	1.90688	-0.323068	1.69849	1.08676	1.33126	-0.408483	1.45752
X442	SVSSESEPF	1.27818	1.01876	-0.955886	1.18038	-0.919531	-0.914995	1.32887	-0.928209	-1.00553	0.559212	0.894279	0.667016	-0.957455	0.888062	0.776179	-1.06447	-0.922073	-0.922794
X443	SVSSESEPFNL	0.556637	0.721643	0.739383	0.937479	0.0820105	1.73907	0.804109	0.639444	1.03446	-1.13933	-1.07768	-1.08429	-1.08949	0.199706	0.557736	-1.1197	-1.12346	-1.37774
X444	SVSSESEPFNLR	-0.589278	-0.428381	0.235707	1.29751	1.6487	1.49517	-0.308067	-0.941731	-0.920717	-0.912812	-0.909816	1.54352	0.453963	1.08951	-0.916512	-0.00904072	-0.916174	-0.911549
X445	SVSSESEPFNLRS	1.48719	1.21514	1.73856	-0.17981	-0.465494	-0.448163	2.16048	-0.451285	0.682439	-0.481489	-0.714636	-0.817712	-1.42579	-0.449741	-0.467602	-0.450112	-0.478438	-0.453533
X446	TDTGSSNNQLDQM	1.11002	0.68872	-0.136878	-0.673178	2.43363	0.439408	0.310441	-0.681461	0.391632	-0.686454	1.92988	-0.674534	-0.701275	-0.708565	-0.688534	-0.679215	-0.761255	-0.912378
X447	TETTSFSITKFSPDQKNLIFQGDGY	-0.665325	-0.619425	-0.586156	-0.695763	-0.559415	-0.890666	-0.798289	-0.562118	-0.620893	0.971811	0.370796	-0.413725	0.306847	-0.554935	-0.430173	2.09758	1.83595	1.8139
X448	TETWNPNHPE	-2.40891	0.520021	0.461257	0.522106	-2.41283	0.551229	0.382935	-1.35906	0.554502	0.0421914	-0.262849	0.491975	0.0503094	0.491059	0.422502	0.590001	0.652305	0.711265
X449	TEYEEIEKV	-1.09582	-1.0648	-1.04876	-1.05966	-0.836525	-1.04459	-1.04126	1.49219	1.11855	1.54232	-0.524294	0.908421	0.982945	0.820983	0.860337	0.00575269	-0.347192	0.3314
X450	TEYEEIEKVLLEEQEQK	-0.647088	-0.93647	-0.939282	-0.718389	-0.653725	-0.777704	-0.933004	-0.872554	-0.656717	1.29801	-0.204762	1.56697	0.107555	1.57235	0.856264	-0.646195	1.12889	1.45585
X451	TFFIAPVDTKPQTGGGY	-0.220332	-0.555976	-1.14673	-1.16446	-0.232749	-1.14666	-1.22002	-1.16258	-1.28773	0.487192	0.616154	0.700222	1.00729	0.643684	0.956144	1.35301	1.24233	1.1312
X452	TGGTVITDDLGLELK	-0.34361	-0.669447	-0.537472	-0.58696	-0.536231	-0.622299	-0.521247	-0.518344	-0.842565	-0.332175	-0.332094	-0.344056	1.88049	-0.441491	0.874587	1.89899	2.30716	-0.333241
X453	TGSDDNVISQIENPV	-0.966283	-0.669575	-0.988901	-0.987407	-0.522877	-0.46512	0.739645	-1.59394	-1.00722	1.14414	-0.977498	0.705621	1.11665	1.06962	1.63403	0.275748	0.575704	0.917674
X454	TGSDDNVISQIENPVK	-0.712583	-0.748128	-0.751634	-0.747505	1.71581	-0.665015	-0.681505	-0.69672	-0.758242	0.224686	2.9767	0.111768	0.380343	0.216421	-0.0212523	0.395977	0.426671	-0.665788
X455	TGSDDNVISQIENPVKE	-0.358845	-0.452424	-0.439012	-0.378649	2.08846	-0.387313	-0.362393	-0.36942	-0.541568	0.355655	3.21153	-0.345085	-0.383599	-0.345301	-0.219519	-0.348368	-0.355559	-0.368582
X456	TGSDDNVISQIENPVKEL	-0.93854	-1.09044	-0.984565	-0.939559	0.88449	-0.952722	-1.09139	1.10846	-0.937633	0.533925	2.34243	0.514265	0.63156	0.842694	0.807855	-0.300433	-0.447505	0.0171059
X457	TIFLPQFTDADF	-0.864149	-0.866355	-0.867765	-0.906488	-0.865222	-0.864886	-0.962777	-0.868716	-1.10405	1.0367	0.497414	0.376688	1.67609	0.520429	0.29322	1.58126	1.04328	1.14533
X458	TIFLPQQTDADFI	-0.877146	-0.719685	-0.65223	-0.738914	-0.328011	-0.719651	-0.895429	-0.315292	-0.807965	0.282855	0.780947	-0.312611	1.89618	-0.332054	-0.313292	2.57088	1.1037	0.377715
X459	TIFLPQQTDADFILV	-0.833907	-0.700971	-0.463209	-0.745082	-0.387695	-0.806222	-0.856132	-0.30198	-0.785689	-0.0992055	-0.224854	-0.225105	1.49126	-0.232332	-0.227845	2.41126	1.28944	1.69828
X460	TLFENENGHIR	-0.670078	-0.6056	-0.580387	-0.488975	0.0359189	-0.697681	-0.622721	-0.302679	-0.580894	0.971868	3.65146	0.0279398	0.0360119	-0.0664566	0.0326683	-0.116675	0.0343572	-0.0580779
X461	TLFLPQYTDADFI	-1.12224	-0.851598	-0.366331	-1.03313	-0.328189	-0.771223	-0.860841	0.0688241	-0.754102	0.881132	0.0881576	0.0926024	1.94584	0.0756621	0.0980176	2.68144	0.0884627	0.0675191
X462	TLFLPQYTDADFILV	-0.723467	-0.768644	-0.930076	-0.357838	-0.600198	-0.430388	-1.13327	-0.0677807	-0.789392	1.9591	0.0249538	0.624593	2.85278	0.0287797	0.257015	0.0209559	0.0251053	0.00776274
X463	TLNEVVPLKDVVPEWVRIGF	-1.15513	-0.797055	-0.530285	-1.02595	-0.420286	-0.876201	-0.63902	-0.29353	-0.742438	1.0749	-0.286151	0.984002	-0.308074	0.787088	0.37746	2.12035	-0.286182	2.0165
X464	TVLSPNDRNSYN	0.305991	3.23259	1.69135	0.286786	-0.104624	0.130494	0.30662	-0.534151	-0.336669	-0.43961	-0.324728	-0.649834	-0.504358	-0.624844	-0.774722	-0.367111	-0.814372	-0.4788
X465	TVNEGKGDFELVGQ	1.13378	0.729226	1.19967	-0.83748	-0.868388	1.17615	-0.826816	1.80533	-0.822897	-0.853051	-0.841214	1.25753	0.0751193	0.153107	0.460604	-0.825407	-1.29036	-0.82491
X466	TVNEGKGDFELVGQRNENQQEQ	-0.598294	-0.949582	-0.825293	-0.876561	-0.237653	-0.863069	-0.722348	-0.401689	-0.631467	1.44334	-0.283126	0.233975	0.227277	1.22775	2.91148	-0.100647	0.0743055	0.371604
X467	VESEAGLTETWNPNHPEL	-0.281088	-0.294945	-0.267031	-0.251415	0.0817035	0.521904	1.60032	-0.780247	-0.272054	-0.256044	3.37069	-0.252163	-0.868847	-0.25415	-0.260166	-0.514048	-0.588109	-0.434309
X468	VFEDNDFET	-0.976419	-0.911014	-0.368957	-1.47955	-0.336415	-0.438463	-0.433841	-0.330864	-0.396935	1.33375	-0.422799	1.72788	-0.322177	1.035	0.656508	2.31701	-0.327599	-0.325109
X469	VFEDNDFETK	0.142818	-0.208409	0.0610437	0.286768	0.867885	-0.393968	0.684873	-0.620076	-0.516269	-0.397632	3.57821	-0.39485	-0.694449	-0.46197	-0.394952	-0.717678	-0.415242	-0.406105
X470	VFEDNDFETKIDT	1.81827	1.22267	0.908823	1.19447	-0.765372	0.0679164	1.13116	1.36396	0.406603	-0.898387	-0.771577	-0.783028	-0.999335	-0.783347	-0.767244	-0.78987	-0.772493	-0.783225
X471	VLDLAIPVNRPGQL	-0.760841	-0.736423	-0.669004	-0.64678	-0.18703	-0.784162	-0.793806	-0.195481	-0.52896	1.05089	3.4492	0.190857	0.540396	-0.046918	0.0827884	0.199947	0.0237065	-0.188378
X472	VLDLAIPVNRPGQLQSF	-0.738508	-0.86249	-0.873121	-0.675757	-0.341961	-0.719736	-0.891416	-0.340768	-0.705024	1.16305	2.95717	0.484935	1.07703	0.761938	0.368047	-0.338798	0.0284715	-0.353065
X473	VLDLAIPVNRPGQLQSFL	-0.625111	-0.902539	-0.821088	-0.64577	-0.434485	-0.449741	-0.945013	-0.497128	-0.723597	1.73745	0.781736	1.217	2.01382	-0.164383	1.71218	-0.420795	-0.416888	-0.415652
X474	VLLEEQENEPH	-0.495287	-0.801365	-0.386362	-0.732955	-0.252358	-0.340715	-0.379305	-0.779897	-0.683896	-0.246961	-0.295397	2.14478	-0.253145	1.9474	2.28951	-0.238924	-0.254317	-0.240809
X475	VLLEEQENEPHQ	0.794586	0.743949	0.946202	1.24839	0.352481	1.13578	1.00003	1.06672	1.28148	-0.938637	-0.935453	-0.940568	-1.02443	-0.93888	-0.93805	-0.941017	-0.935515	-0.977068
X476	VNEGKGDFE	-0.802172	0.558979	0.0420453	2.73789	0.0381447	0.0448366	2.35853	-0.423684	-0.505078	-0.318102	0.0359566	-0.27205	-0.409071	-0.315322	-0.408968	-0.957642	-0.828395	-0.575901
X477	VNGVAPGPI	-0.762369	-0.771944	-0.503642	-0.857234	-0.581915	-0.817414	-0.638545	-0.495013	-0.516973	0.223556	-0.497884	0.703191	-0.502407	0.136185	-0.0653939	2.15924	1.91742	1.87114
X478	VNGVAPGPIWTPL	1.33576	1.31184	1.27386	1.2094	-1.28325	1.02404	1.04376	0.904326	-1.2589	-0.675675	-0.327013	-0.561181	-0.510011	-0.915475	-1.2516	-0.628855	-0.196009	-0.495017
X479	VNPDDEEDL	-1.05527	-1.06775	-0.561341	-1.14065	0.538753	-0.566011	-0.734256	-0.554359	-0.77849	0.946482	-0.552741	1.86809	1.18348	1.40454	1.09148	1.09148	-0.557766	-0.555677
X480	VNSVEIKEGSLLLPHYNS	-0.481084	-0.872599	-0.677599	-0.698972	0.473363	-0.724819	-0.566178	-0.45691	-0.921344	0.574823	-0.36687	0.442666	0.576917	0.576135	3.38266	-0.297459	-0.174391	0.211666
X481	VNSVEIKEGSLLLPN	-1.349	-1.14824	-0.131939	-1.00129	-0.131556	-1.02259	-0.608312	-0.128281	-0.743035	-0.125856	-0.170205	0.288595	1.79068	1.61142	-0.125447	2.02274	0.0806117	0.891714
X482	VNSVEIKEGSLLLPNYN	-0.755601	-0.920035	-0.848001	-0.710005	-0.428974	-0.577273	-0.708548	-0.455207	-0.73309	0.720722	2.97882	0.634188	0.696356	0.470762	1.31409	-0.427048	-0.402352	0.151203
X483	VNSVEIKEGSLLLPNYNS	-0.0150476	-0.919494	-0.923051	-0.934368	0.823573	-0.160966	-0.951603	1.12853	0.481204	1.58519	0.197874	-1.13579	1.49874	-1.00906	-0.924852	0.910732	1.2838	-0.935416
X484	VNSVEIKEGSLLLPNYNSR	-0.301275	-0.616862	-0.518779	-0.342098	2.78505	-0.334134	-0.183575	-0.3366	-0.864906	-0.189285	-0.174043	-0.181009	-0.17031	-0.0732376	2.60351	-0.396223	-0.528405	-0.177819
X485	VSREQIEELSKNA	-0.853375	-0.445661	-0.428875	-0.678915	-0.37327	-0.643443	-0.371865	1.95246	3.00663	0.0191904	-0.38044	-0.371631	-0.374267	-0.508002	-0.39344	0.903739	-0.368586	0.309744
X486	VSSVEINEGGLLLPH	-0.930429	-0.995546	-0.923203	-0.929885	-0.916679	-0.917412	-0.982275	-0.916853	-1.14748	0.75469	0.991158	1.01942	1.29998	1.06774	1.03218	0.941982	0.629955	0.922667
X487	VSSVEINEGGLLLPHYNS	-0.869245	-1.08441	-0.899296	-0.865358	-0.844586	-0.853908	-0.861409	-0.825255	-0.840878	0.231049	1.46021	1.31621	0.626565	1.23901	1.77394	0.0598237	0.321843	0.915691
X488	VSSVEINEGGLLLPHYNSR	-0.5794	-0.951917	-1.18375	-0.499021	-0.213869	-0.967575	-1.2113	-0.225046	-0.675901	-0.223974	0.694384	-0.147923	1.10959	1.98708	0.0246058	-0.213129	1.61214	1.66501
X489	VTSYTLNEVVPLKDVVPEWVR	-0.534592	-0.562968	-0.923015	-4.90465e-05	-0.234602	-0.761194	-1.00821	-0.660981	-0.799601	-0.155897	-0.083842	0.0110848	1.00703	0.0261442	-0.15123	0.0619581	1.95551	2.81446
X490	VTSYTLNEVVPLKDVVPEWVRIGF	0.0298487	-0.303299	-0.0449895	-0.505395	-0.943184	-0.911247	-0.883947	-2.03932	-1.4436	0.62919	0.352512	0.448391	0.556206	0.28449	0.28735	1.50861	1.48057	1.49782
X491	VVEEEEGEWRGSQ	1.63699	1.56592	1.31985	1.47501	-0.57467	-0.575104	1.20771	0.932915	-0.58319	-0.712745	-0.578491	-0.774562	-0.864882	-0.718089	-0.758791	-0.721089	-0.679575	-0.597211
X492	WMYNDQDTPVIA	1.77648	1.27418	-0.569823	-0.576938	1.84059	-0.608476	-0.648822	1.49701	1.21853	-0.904246	-0.578774	-0.564901	-0.621942	-0.882462	-0.598328	-0.578304	0.0919008	-0.565678
X493	YLGGNPETEFPET	-0.600523	-0.620564	-0.511354	-0.643451	-0.756036	-0.745863	-0.849652	-0.579998	-0.669746	0.271924	-0.507862	0.246448	0.487616	-0.0177166	-0.507211	1.83786	2.08333	2.0828
X494	YLVNPDDEED	1.46282	0.908727	-0.98168	0.238746	-0.976286	0.629691	0.475093	-1.13361	0.45855	-0.394434	-1.00847	0.127767	-1.02368	-1.02657	-0.0689172	-1.00138	1.93492	1.37872
X495	YLVNPDDEEDL	-0.918814	-0.870707	-0.765902	-0.75509	-0.916579	-0.752867	-0.941093	-0.752031	-0.876359	1.50619	-0.751127	1.52793	1.33043	0.345661	0.531019	0.795259	0.931526	1.33255
X496	YLVNPDDEEDLRV	-0.911317	-0.177897	0.331573	2.52392	-0.180445	0.40213	2.64031	-0.405794	-0.480335	-0.280926	-0.181747	-0.178922	-0.377272	-0.197895	-0.347245	-0.866926	-0.79627	-0.514949
X497	YLVNPDDEEDLRVV	0.41467	-0.244145	-1.44642	0.807645	-0.537472	0.864262	-1.42007	-0.477981	-1.54001	0.571087	0.61458	0.163105	2.52119	-0.271476	-0.922922	0.0907083	0.30603	0.507213
X498	YNAAWDPSNKER	0.0432925	-0.195568	-0.176915	0.838825	3.69835	-0.172972	0.404009	-0.180273	-0.589558	-0.426975	-0.173828	-0.196514	-0.212922	-0.370712	-0.183557	-0.755368	-0.787484	-0.561828
X499	YQHEGKEEET	-0.685916	1.51302	-0.688438	2.00729	-0.683246	2.09727	-0.685978	-0.728732	-0.695676	-0.592539	-0.858485	-0.677705	0.700427	-0.682486	-0.519286	0.637396	0.443261	0.0998137
X500	YQHEGKEEETSSE	1.63865	1.86685	-0.253986	2.15442	-0.26372	-0.254689	1.26773	-0.265509	-0.800805	-0.438663	-0.255106	-0.366457	-0.961597	-0.275681	-0.254706	-1.04126	-0.820308	-0.675172
X501	YQHEGKEEETSSESQER	1.52305	1.19119	1.12608	1.24227	0.821053	1.05849	1.17326	-0.831426	0.329231	-0.843533	-0.829122	-0.829825	-0.830823	-0.892113	-0.888445	-0.858841	-0.83088	-0.829633
