# Supplementary material for: Solid-state fermentation of green lentils by Lactiplantibacillus plantarum leads to formation of distinct peptides that are absorbable and enhances DPP-IV inhibitory activity in an intestinal Caco-2 cell model
Source: Royal Society of Chemistry journal article supplement (doi:10.1039/d4fo03326d), 2024-01-01
Supplement: d4fo03326d4.xlsx [file d4fo03326d4.xlsx]

## Sheet: Sheet0
From	Entry	Reviewed	Entry Name	Protein names	Gene Names	Organism	Length	group_name
A0A173G7D5	A0A173G7D5	unreviewed	A0A173G7D5_LENCC	Lectin		Lens culinaris subsp. culinaris (Cultivated lentil) (Lens esculenta)	261	Lectin
A0A2L1J0R5	A0A2L1J0R5	unreviewed	A0A2L1J0R5_LATSA	Superoxide dismutase, EC 1.15.1.1	SOD	Lathyrus sativus (White vetchling)	126	Other
A0A3G5BED8	A0A3G5BED8	unreviewed	A0A3G5BED8_LATSA	Beta-lathyrin 1		Lathyrus sativus (White vetchling)	370	Lathyrin
A0A7H0S597	A0A7H0S597	unreviewed	A0A7H0S597_PEA	FAX3		Pisum sativum (Garden pea)	225	Other
B0BCI9	B0BCI9	unreviewed	B0BCI9_LENCU	Convicilin	cvc	Lens culinaris subsp. odemensis	162	Convicilin
B0BCJ3	B0BCJ3	unreviewed	B0BCJ3_PEA	Convicilin	cvc	Pisum sativum subsp. sativum	511	Convicilin
B0BCK0	B0BCK0	unreviewed	B0BCK0_LATHI	Cvc protein	cvc	Lathyrus hirsutus (Rough pea) (Hairy vetchling)	576	Convicilin
C4TP26	C4TP26	unreviewed	C4TP26_9FABA	Dehydrin a	DHNa	Vicia monantha	195	Dehydrin
C7BUS0	C7BUS0	unreviewed	C7BUS0_LENCU	Bowman-Birk inhibitor	ltci	Lens culinaris (Lentil) (Cicer lens)	114	Bowman-Birk inhibitor
D3VND7	D3VND7	unreviewed	D3VND7_PEA	Vicilin 47k	vc-2	Pisum sativum (Garden pea)	438	Vicilin
I0B569	I0B569	unreviewed	I0B569_VICFA	Vicilin		Vicia faba (Broad bean) (Faba vulgaris)	463	Vicilin
O24294	O24294	unreviewed	O24294_PEA	Legumin (Minor small)	legS	Pisum sativum (Garden pea)	566	Legumin
O24295	O24295	unreviewed	O24295_PEA	Lipoxygenase, EC 1.13.11.-	lox1:Ps:5	Pisum sativum (Garden pea)	866	Other
O24538	O24538	unreviewed	O24538_VICFA	Potassium channel		Vicia faba (Broad bean) (Faba vulgaris)	807	Other
O49927	O49927	unreviewed	O49927_PEA	p54 protein	p54	Pisum sativum (Garden pea)	483	p54 protein
Q03971	Q03971	unreviewed	Q03971_VICFA	N-terminal incomplete legumin A1 pre-pro-polypeptide	LeA1	Vicia faba var. minor	497	Legumin
Q40117	Q40117	unreviewed	Q40117_LENCU	Vicilin type C		Lens culinaris (Lentil) (Cicer lens)	88	Vicilin
Q41032	Q41032	unreviewed	Q41032_PEA	Legumin J	J	Pisum sativum (Garden pea)	36	Legumin
Q41674	Q41674	unreviewed	Q41674_VICNA	Convicilin		Vicia narbonensis (Narbonne vetch)	545	Convicilin
Q41676	Q41676	unreviewed	Q41676_VICNA	Legumin A		Vicia narbonensis (Narbonne vetch)	482	Legumin
Q41677	Q41677	unreviewed	Q41677_VICNA	Vicilin		Vicia narbonensis (Narbonne vetch)	463	Vicilin
Q41703	Q41703	unreviewed	Q41703_VICSA	Legumin B		Vicia sativa (Spring vetch) (Tare)	485	Legumin
Q43671	Q43671	unreviewed	Q43671_VICFA	Storage protein		Vicia faba var. minor	308	Other
Q84UI0	Q84UI0	unreviewed	Q84UI0_LENCU	Allergen Len c 1.0102		Lens culinaris (Lentil) (Cicer lens)	415	Vicilin
Q84UI1	Q84UI1	unreviewed	Q84UI1_LENCU	Allergen Len c 1.0101		Lens culinaris (Lentil) (Cicer lens)	418	Vicilin
Q8H1A6	Q8H1A6	unreviewed	Q8H1A6_PEA	Heat shock protein		Pisum sativum (Garden pea)	158	Other
Q8S4X3	Q8S4X3	unreviewed	Q8S4X3_PEA	TIR-similar-domain-containing protein TSDC		Pisum sativum (Garden pea)	464	Other
Q99304	Q99304	unreviewed	Q99304_VICFA	Legumin A2 primary translation product	LeA2	Vicia faba var. minor	500	Legumin
Q9AT20	Q9AT20	unreviewed	Q9AT20_LENCU	Histone H1	His1	Lens culinaris (Lentil) (Cicer lens)	281	Other
Q9LKJ2	Q9LKJ2	unreviewed	Q9LKJ2_PEA	Phosphoglycerate kinase, EC 2.7.2.3		Pisum sativum (Garden pea)	401	Other
Q9M3X6	Q9M3X6	unreviewed	Q9M3X6_PEA	Convicilin	cvc	Pisum sativum (Garden pea)	613	Convicilin
Q9M3X8	Q9M3X8	unreviewed	Q9M3X8_LENCU	Convicilin	cvc	Lens culinaris (Lentil) (Cicer lens)	518	Convicilin
Q9ZRW9	Q9ZRW9	unreviewed	Q9ZRW9_VICFA	Polyubiquitin		Vicia faba (Broad bean) (Faba vulgaris)	229	Other
W5RWG0	W5RWG0	unreviewed	W5RWG0_LENCC	Insecticidal lentil peptide		Lens culinaris subsp. culinaris (Cultivated lentil) (Lens esculenta)	118	Other
