# Supplementary material for: Solid-state fermentation of green lentils by Lactiplantibacillus plantarum leads to formation of distinct peptides that are absorbable and enhances DPP-IV inhibitory activity in an intestinal Caco-2 cell model
Source: Royal Society of Chemistry journal article supplement (doi:10.1039/d4fo03326d), 2024-01-01
Supplement: d4fo03326d5.xlsx [file d4fo03326d5.xlsx]

## Sheet: GREEN LENTILS
Green lentils
29/03/19				2019-05-04
				MRS
Label	Time	pH	Acidity (mL .1M NaOH)	-7	-6	-5	-4	-3	CFU/mL		AVG
A	0					4	20	NC	20000000	10000000	15000000	-7	10000000
A	48	4.01	31.4	4	14	NC			2000000000	700000000	1350000000	-6	1000000
B	0					2	24	NC	10000000	12000000	11000000	-5	100000
B	48	4.02	31.8	6	21	NC			3000000000	1050000000	2025000000	-4	10000
C	0					4	25	NC	20000000	12500000	16250000
C	72	4.06	40.9		4	20	NC		200000000	100000000	150000000	volume	0.02
D	0					5	28	NC	25000000	14000000	19500000
D	72	3.98	32.7			4	16	NC	20000000	8000000	14000000
3/04319
				MRS
Label	Time	pH	Acidity (mL .1M NaOH)	-7	-6	-5	-4	-3	CFU/mL		AVG
P-1	0	6.49	3.3									-7	10000000
P-1	0	6.43	3.2									-6	1000000
P-2	0	6.44	4.1									-5	100000
P-2	0	6.38	4.2									-4	10000
P-3	0	6.38	4
P-3	0	6.35	3.8									volume	0.02
		6.41167	3.76667
2019-06-04
				MRS
Label	Time	pH	Acidity (mL .1M NaOH)	-7	-6	-5	-4	-3	CFU/mL		AVG
	0						11	77	5500000	3850000	4675000
G-1	48	4.01	30.7		43	NC	NC		2150000000		2150000000	-7	10000000
	0					1	8	64	100000	80000	90000	-6	1000000
G-2	48	3.99	32.5		37	NC	NC		1850000000		1850000000	-5	100000
G-2	48	3.94	29.4									-4	10000
	0						5	72	2500000	3600000	3050000	-3	1000
G-3	48	3.95	31.3		30	NC	NC		1500000000		1500000000	volume	0.02
	0					1	9	77	5000000	4500000	4750000
K-1	72	3.96	31.7			2	46	NC	10000000	23000000	16500000
	0					1	15	76	500000	7500000	4000000
K-2	72	3.9	32.1			34	NC	NC	170000000		170000000
	0					1	11	NC	5000000	5500000	5250000
K-3	72	3.94	33.8		2	12	NC		100000000	60000000	80000000
17/04/19
				MRS
Label	Time	pH	Acidity (mL .1M NaOH)	-7	-6	-5	-4	-3	CFU/mL		AVG
						3	20		15000000	10000000	12500000
M-1	24	4.17	28.6	14	86				7000000000	4300000000	5650000000	-7	10000000
M-2	24	4.22	29.3	11	60				5500000000	3000000000	4250000000	-6	1000000
M-3	24	4.19	29.9	7	63				3500000000	3150000000	3325000000	-5	100000
						2	17		10000000	8500000	9250000
N-1	48	4.21	30.8	2	15				1000000000	750000000	875000000	-4	10000
N-2	48	4.11	32.9	5	44				2500000000	2200000000	2350000000
N-3	48	4.15	31.4	2	20				1000000000	1000000000	1000000000	volume	0.02
						1	18		5000000	9000000	7000000
O-1	72	4.02	33.1
O-2	72	4.03	31
O-3	72	4.05	30.1
						3	18		15000000	9000000	12000000	Time						Log CFU/mL	pH	Acidity
Q-1	96	4.04	30.9									0	12500000	9250000	7000000	12000000		7.00807	6.41167	3.76667
Q-2	96	4.1	30.3									24	5650000000	4250000000	3325000000			9.64427	4.19333	29.2667
Q-3	96	4.06	30.5									48	875000000	2350000000	1000000000			9.14871	4.15667	31.7
												72	16500000	170000000	80000000			7.94858	4.03333	31.4
												96						6.5	4.06667	30.5667
												Log CFU/mL	STD CFU/ml	pH	STD pH	Acidity	STD Acidity
											0	7.00807	0.116565	6.41167	0.0511534	3.76667	0.42269
											24	9.64427	0.115234	4.19333	0.0251661	29.2667	0.650641
											48	9.14871	0.23279	4.15667	0.0503322	31.7	1.08167
											72	7.94858	0.516933	4.03333	0.0152753	31.4	1.53948
											96	6.5		4.06667	0.0305505	30.5667	0.305505

## Sheet: YELLOW PEA
Yellow Pea
15/04/19
				MRS
Label	Time	pH	Acidity (mL .1M NaOH)	-7	-6	-5	-4	-3	-2	CFU/mL			AVG
C	0	6.17	6.8
D	0	6.31	6.6
E	0	6.15	6.8
						2	28			10000000		14000000	12000000
M-1	24	3.97	23.8	15	93					7500000000		4650000000	7500000000	-7	10000000
M-2	24	4.02	23.3	7	74					3500000000		3700000000	3500000000	-6	1000000
M-3	24	4	27.4	10	90					5000000000		4500000000	5000000000	-5	100000
						3	23			15000000		11500000	13250000
N-1	48	4.04	28.2		1	46				50000000		230000000	140000000	-4	10000
N-2	48	4.06	27.5		4	19	10			200000000		95000000	147500000	-3	1000
N-3	48	4	28.8		16	80				800000000		400000000	600000000	volume	0.02
						3	23			15000000		11500000	13250000
O-1	72	4.1	27.4		1	3	30			15000000		15000000	15000000
O-2	72	4.04	28.4			1	8	44		4000000		2200000	3100000
O-3	72	4.02	27				14	57		7000000		2850000	4925000
						2	24			10000000		12000000	11000000
Q-1	96	3.94	28.8					2	34	100000		170000	135000
Q-2	96	4.06	28.6					4	44	200000		220000	210000
Q-3	96	3.99	32.2					3	26	150000		130000	140000
					Yellow Peas
					Time					AVG		Log CFU/mL	STD CFU/ml	pH	STD pH	Acidity	STD Acidity
					0	12000000	13250000	13250000	11000000	12375000		7.09255	0.0389409	6.21	0.087178	6.73333	0.11547
					24	7500000000	3500000000	5000000000		5.33333e+09		9.727	0.16561	3.99667	0.0251661	24.8333	2.23681
					48	140000000	147500000	600000000		2.95833e+08		8.47105	0.358535	4.03333	0.0305505	28.1667	0.650641
					72	15000000	3100000	4925000		7675000		6.88508	0.351953	4.05333	0.0416333	27.6	0.72111
					96	135000	210000	140000		161667		5.20862	0.106519	3.99667	0.0602771	29.8667	2.0232
					0	7.07918	7.12222	7.12222	7.04139
					24	9.87506	9.54407	9.69897
					48	8.14613	8.16879	8.77815
					72	7.17609	6.49136	6.69241
					96	5.13033	5.32222	5.14613
					Green lentils
					Time					AVG		Log CFU/mL	STD CFU/ml	pH	STD pH	Acidity	STD Acidity
					0	12500000	9250000	7000000	12000000	10187500		7.00807	0.116565	6.41167	0.0511534	3.76667	0.42269
					24	5650000000	4250000000	3325000000		4.40833e+09		9.64427	0.115234	4.19333	0.0251661	29.2667	0.650641
					48	875000000	2350000000	1000000000		1.40833e+09		9.14871	0.23279	4.15667	0.0503322	31.7	1.08167
					72	16500000	170000000	80000000		8.88333e+07		7.94858	0.516933	4.03333	0.0152753	31.4	1.53948
					96							6.5		4.06667	0.0305505	30.5667	0.305505
					0	7.09691	6.96614	6.8451	7.07918
					24	9.75205	9.62839	9.52179
					48	8.94201	9.37107	9
					72	7.21748	8.23045	7.90309
					96
